# Supplementary material for: Access to ligand-stabilized PH-containing phosphenium complexes
Source: Royal Society of Chemistry journal article supplement (doi:10.1039/d3dt03869f), 2024-01-01
Supplement: d3dt03869f1.pdf [file d3dt03869f1.pdf]

Supporting Information

## Access to ligand-stabilized PH-containing phosphenium complexes

David Biskup,<sup>a</sup> Gregor Schnakenburg,<sup>a</sup> Arturo Espinosa Ferao<sup>\*b</sup> and Rainer Streibel<sup>\*a</sup>

<sup>a</sup>*Institut für Anorganische Chemie, Rheinische Friedrich-Wilhelms-Universität Bonn, Gerhard-Domagk-Str. 1, 53121 Bonn, Germany.*

<sup>b</sup>*Departamento de Química Orgánica, Facultad de Química, Campus de Espinardo, Universidad de Murcia, 30100 Murcia, Spain.*

### Table of contents

|   |                                                    |      |
|---|----------------------------------------------------|------|
| 1 | General methods .....                              | S2   |
| 2 | Experimental procedures and characterisation ..... | S5   |
| 3 | NMR spectra .....                                  | S15  |
| 4 | X-ray diffraction studies .....                    | S66  |
| 5 | Computational Details .....                        | S99  |
| 6 | Calculated structures .....                        | S100 |
| 7 | References .....                                   | S116 |

## 1 General methods

All reactions were performed under a dried and deoxygenated argon atmosphere using Schlenk or glovebox techniques. The used argon (>99.998%) was purified by a system of three columns (deoxygenation by a BTS copper catalyst (BASF PuriStar® R3-15S) at ca. 100 °C, removing moisture with silica gel, phosphorus pentoxide desiccant with indicator (Sicapent®) and calcium chloride). Glassware, spatulae, cannulae as well as filter papers were dried in a compartment dryer at 110 °C for at least one hour. Additionally, the glassware was heated with a heat gun (up to 550 °C) under active vacuum (<0.02 mbar) and filled with argon three times. Sterile syringes were purged with argon three times before use. The solvents were dried by standard procedures<sup>1</sup> by refluxing over proper desiccants under an argon atmosphere (*n*-pentane and toluene over sodium wire ( $\varnothing = 2$  mm); diethyl ether stabilized with 3,5-di-*tert*-butyl-4-hydroxytoluene (BHT) and tetrahydrofuran over benzophenone and sodium wire; dichloromethane over calcium hydride) for several days and distilled before use. Alternatively, diethyl ether and toluene were dried using an MBraun SPS-800 solvent purification system. For filtration stainless steel cannulae ( $\varnothing = 1$  mm and 2 mm) with Whatman® glass microfiber filters (grade GF/B) were used if not stated otherwise. After use, devices made of stainless steel were cleaned with acetone, water and diluted hydrochloric acid and glassware by storage in a concentrated solution of potassium hydroxide in isopropanol for at least two days and in diluted hydrochloric acid for one day. Afterwards, the glassware was washed with water and soap, acetone and petroleum ether 40/65. All joints were greased with OKS 1112 grease or with PTFE paste (Carl Roth). Vacuum was applied by a rotary vane pump (vacuubrand RZ6) enabling pressures <10<sup>-2</sup> mbar.

NMR spectra were recorded on a Bruker Avance I 300 MHz, Bruker Avance I 400 MHz, Bruker Avance I 500 MHz or Bruker Avance III HD Ascend 500 MHz spectrometer at the NMR department of the University of Bonn and subsequently analysed by the program *Mestrenova 14.2*. The calibration of the <sup>1</sup>H and <sup>13</sup>C NMR spectra was done via the solvent residual signals relative to tetramethylsilane (<1% in CDCl<sub>3</sub>) (C<sub>6</sub>D<sub>6</sub>:  $\delta(^1\text{H}) = 7.16$  ppm and  $\delta(^{13}\text{C}) = 128.06$  ppm, CD<sub>2</sub>Cl<sub>2</sub>:  $\delta(^1\text{H}) = 5.32$  ppm and  $\delta(^{13}\text{C}) = 53.84$  ppm).<sup>2</sup> <sup>11</sup>B NMR spectra were measured relative to BF<sub>3</sub>·OEt<sub>2</sub> in CDCl<sub>3</sub> as external reference by using the <sup>2</sup>H frequency of the deuterated solvent (lock frequency) and the frequency ratio value  $\Xi(^{11}\text{B}) = 32.083974\%$ , <sup>19</sup>F NMR spectra relative to CFCl<sub>3</sub> using the <sup>2</sup>H frequency of the deuterated solvent (lock frequency) and the frequency ratio value  $\Xi(^{19}\text{F}) = 94.094011\%$ , <sup>27</sup>Al NMR spectra relative to 1.1 M Al(NO<sub>3</sub>)<sub>3</sub> in D<sub>2</sub>O using the <sup>2</sup>H frequency of the deuterated solvent (lock frequency) and the frequency ratio value  $\Xi(^{27}\text{Al}) = 26.056859\%$ , <sup>31</sup>P NMR spectra relative to 85% H<sub>3</sub>PO<sub>4</sub> in water using the <sup>2</sup>H frequency of the deuterated solvent (lock frequency) and the frequency ratio value  $\Xi(^{31}\text{P}) = 40.480742\%$ , and <sup>15</sup>N NMR spectra via ge-2D NMR <sup>1</sup>H,<sup>15</sup>N HMBC experiments relative to liquid ammonia by using the <sup>2</sup>H frequency of the deuterated solvent (lock frequency) and the frequency ratio value  $\Xi(^{15}\text{N}) = 10.132912\%$ .<sup>3</sup> To obtain the <sup>15</sup>N NMR chemical shifts relative to CH<sub>3</sub>NO<sub>2</sub>, 380.5 ppm were

subtracted.<sup>4</sup> All lock frequencies were calibrated internally against the <sup>1</sup>H signals of solutions of tetramethylsilane with a volume fraction of  $\Phi \leq 1\%$  in the corresponding deuterated solvent. The used deuterated solvents were purified by distillation over proper desiccants (C<sub>6</sub>D<sub>6</sub> over a potassium mirror and CD<sub>2</sub>Cl<sub>2</sub> over CaH<sub>2</sub>), trap-to-trap recondensation and degassing by three freeze-pump-thaw cycles. The purified solvent was stored over 3 Å or 4 Å molecular sieves. The chemical shift ( $\delta$ ) is given in parts per million (ppm) and the coupling constant ( ${}^nJ_{X,Y}$ ) in Hertz (Hz) as absolute values neglecting the sign where  $n$  is the number of bonds between the coupling nuclei X and Y. For assigning the multiplicity following abbreviations were used: s = singlet, d = doublet, q = quartet, dq = doublet of quartets, qd = quartet of doublets, q\* = quartet (intensities 1:1:1:1), qq\* = quartet of quartets (intensities 1:1:1:1), sept = septet, m = multiplet, sat = satellites and br = broad. For <sup>1</sup>H NMR spectra additionally, the number of nuclei is given accordingly which is determined via integration. The <sup>1</sup>H and <sup>13</sup>C NMR signals of compounds were assigned by a combination of COSY, HSQC, HMQC and HMBC experiments to unequivocally assign protons and carbon resonances if necessary. All measurements were performed at ambient temperature (298 K) if not stated otherwise.

Mass spectra using electron impact ionisation (EI) were recorded on a Thermo Finnigan MAT 95 XL sector field instrument using an ionization energy of 70 eV. The calibration and referencing were done using perfluorokerosene (PFK). Liquid injection field desorption ionisation (LIFDI) measurements were performed on a Thermo Finnigan MAT 90 sector field instrument equipped with a LIFDI ion source (Linden CMS). The samples were dissolved in toluene. Electrospray ionisation (ESI) measurements were performed on a Thermo Fisher Scientific Orbitrap XL spectrometer with an HPLC autosampler using acetonitrile or dichloromethane as solvents. Solutions of highly air-sensitive compounds for LIFDI and ESI measurements were prepared in a glovebox using dried, recondensed and degassed solvents. Only selected data are given for detected ions. The peaks are given in mass-to-charge ratio ( $m/z$ ) while only the isotopomer with the highest relative abundance is represented. Additionally, the relative intensities of the peaks are given in parentheses and the proposed molecule fragments are in square brackets if not stated otherwise. High-resolution mass spectra (HRMS) that were obtained using ESI were recorded in a single measurement and, hence, no standard deviations for ESI HRMS were obtained.

ATR-IR spectra of solids were recorded in the spectral range of 4000–400 cm<sup>-1</sup> on a Bruker Alpha FTIR spectrometer with a single-reflection ATR measurement attachment (Platinum-ATR Diamond) or a Shimadzu IRSpirit FTIR spectrometer with a single-reflection ATR measurement attachment (QATR-S) in a glovebox at ambient temperature. For apodization, the Happ-Genzel function was used. All analyses were performed using the programs *EZ OMNIC 7.3* of Fisher Scientific, *OPUS* of Bruker and *LabSolutions IR 2.26* of Shimadzu. Only selected wavenumbers of the absorption bands are given using

reciprocal centimetres ( $\text{cm}^{-1}$ ). The intensities of the bands are marked as strong (s), medium (m) or weak (w).

Elemental analyses were performed on an Elementar Vario Micro analysis device in quadruplicate or triplicate for each sample. All samples were prepared and weighed up in tin or silver sample containers using a micro-analytical balance in a glovebox. The mean C, H, N and S values are given for each compound. Due to instrumental problems and the air sensitivity of several compounds, some values fall outside the recommended error of  $\pm 0.4\%$ .

Melting points were measured using an SRS DigiMelt device or a Büchi melting point determination device according to Dr. Tottoli. The samples were flame-sealed in a glass capillary ( $\varnothing = 0.1 \text{ mm}$ ) *in vacuo* ( $< 0.02 \text{ mbar}$ ) and heated quickly (ca.  $5 \text{ K/min}$ ) for a rough determination of the melting point or decomposition temperature. Afterwards, a heating rate of approximately  $2 \text{ K/min}$  was used until the sample melted or decomposed. The thermally treated samples were cooled to ambient temperature and studied by  $^1\text{H}$  and/or  $^{31}\text{P}$  NMR spectroscopy to confirm whether decomposition had occurred. No internal or external temperature corrections were performed.

Single crystal X-ray diffraction analyses were performed on a Bruker D8 Venture diffractometer, an STOE IPDS-2T diffractometer or an STOE STADIVARI diffractometer, equipped with a low-temperature device (Bruker Kryoflex, Oxford Cryostream 700 series or Oxford Cryostream 800 series) at  $100(2) \text{ K}$  or  $123(2) \text{ K}$  by using graphite monochromated  $\text{Mo-K}\alpha$  radiation ( $\lambda = 0.71073 \text{ \AA}$ ) or  $\text{Cu-K}\alpha$  radiation ( $\lambda = 1.54186 \text{ \AA}$ ). Intensities were measured by fine-slicing  $\Phi$  and  $\omega$  scans and corrected background, polarization and Lorentz effects. A semi-empirical absorption correction was applied for the data sets following Blessing's method.<sup>5</sup> The structure was solved by direct methods and refined anisotropically by the least-squares procedure implemented in the ShelX program system.<sup>6</sup> All non-hydrogen atoms were refined anisotropically. The hydrogen atoms were included isotropically refined using a riding model at the bound carbon atoms. The program *Olex2 1.5*<sup>7</sup> of *OlexSys* was used for analyses and the ellipsoid representations of the molecular structures with the probability level set to 50%. Crystallographic data for the structures reported in this paper have been deposited with the Cambridge Crystallographic Data Centre as supplementary publication no. 2302946 (**2**), 2302947 (**10a**), 2302948 (**10a-Cr**), 2302949 (**11a**), 2302950 (**11b**), 2302951 (**11c**), 2302952 (**12**) and 2302953 (**12-Cr**) which can be obtained free of charge via [www.ccdc.cam.ac.uk/data\\_request/cif](http://www.ccdc.cam.ac.uk/data_request/cif).

## 2 Experimental procedures and characterisation

### Synthesis of complex 2

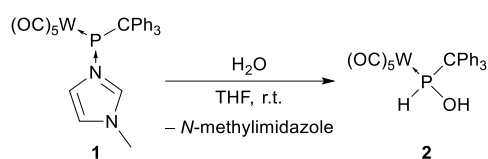

0.07 mL (3.87 mmol, 20.8 eq.) of water was added to a solution of 0.127 g (0.19 mmol, 1.0 eq.) of complex **1**<sup>8</sup> in 2.0 mL of THF at ambient temperature. The solution was stirred for 3 h at ambient temperature. Afterwards, all volatiles were removed *in vacuo* at ambient temperature within 5 minutes and the obtained yellow sticky solid was further dried for 30 minutes. The crude product was purified via column chromatography ( $SiO_2$ ,  $\varnothing = 1$  cm,  $h = 10$  cm) using a 1:9 *n*-pentane/diethyl ether mixture at ambient temperature. Yield: 0.095 g (0.15 mmol, 83%). Mp 181 °C (dec.). Elemental analysis calcd (%) for  $C_{24}H_{17}O_6PW$ : C 46.78, H 2.78; found: C 47.30, H 3.05. IR (ATR Diamond):  $\nu_{max} / cm^{-1} = 1924$  (s) (CO), 1944 (m) (CO), 1993 (m) (CO), 2076 (m) (CO).  $^1H$  NMR (500.04 MHz,  $CD_2Cl_2$ , 298 K):  $\delta / ppm = 7.93$  ( $d_{sat}$ ,  $^1J_{P,H} = 340$  Hz,  $^2J_{W,H} = 7$  Hz, 1H; PH), 7.43–7.38 (m, 9H; CPh<sub>3</sub>), 7.29–7.27 (m, 6H; CPh<sub>3</sub>), 3.79 (d,  $^2J_{P,H} = 5$  Hz, 1H; POH).  $^{13}C\{^1H\}$  NMR (125.75 MHz,  $CD_2Cl_2$ , 298 K):  $\delta / ppm = 199.3$  ( $d_{sat}$ ,  $^2J_{P,C} = 31$  Hz,  $^1J_{W,C} = 143$  Hz; *trans*-CO), 196.3 ( $d_{sat}$ ,  $^2J_{P,C} = 7$  Hz,  $^1J_{W,C} = 126$  Hz; *cis*-CO), 141.7 (s; *ipso*-C), 130.4 (d,  $J_{P,C} = 6$  Hz; Ph), 129.4 (s; Ph), 128.3 (d,  $J_{P,C} = 2$  Hz; Ph).  $^{31}P\{^1H\}$  NMR (202.44 MHz,  $CD_2Cl_2$ , 298 K):  $\delta / ppm = 100.7$  ( $s_{sat}$ ,  $^1J_{W,P} = 279$  Hz).  $^{31}P$  NMR (202.44 MHz,  $CD_2Cl_2$ , 298 K):  $\delta / ppm = 100.7$  ( $d_{sat}$ ,  $^1J_{P,H} = 341$  Hz,  $^1J_{W,P} = 279$  Hz). MS (EI, 70 eV, selected data):  $m/z$  (%) = 616.0 (21)  $[M]^+$ , 476.0 (45)  $[M-5CO]^+$ , 243.3 (100)  $[CPh_3]^+$ . MS (ESI neg., selected data):  $m/z$  (%) = 615.021 (100)  $[M-H]^-$ , 1231.051 (42)  $[2M-H]^-$ . MS (ESI pos., selected data):  $m/z$  (%) = 243.117 (100)  $[CPh_3]^+$ . HRMS (ESI neg.):  $m/z$  calcd for  $[C_{24}H_{16}O_6PW]^-$ : 615.0202; found: 615.0209.

### Generation of complex 3a

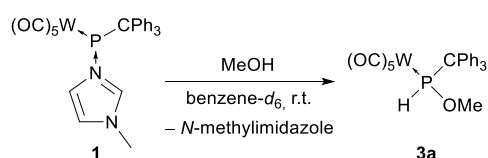

0.01 mL (0.25 mmol, 12.9 eq.) of methanol was added to a solution of 0.013 g (0.02 mmol, 1.0 eq.) of complex **1**<sup>8</sup> in 0.5 mL of benzene- $d_6$ . The reaction mixture was shaken thoroughly for 30 seconds and then kept for 16 h at ambient temperature to obtain a yellow solution. The obtained analytical data were in accordance with the literature.<sup>9</sup> Yield: 97% ( $^{31}P$  NMR integration) (Lit.:<sup>9</sup> 76%).  $^1H$  NMR (300.13 MHz,  $C_6D_6$ , 298 K):  $\delta / ppm = 7.68$  (d,  $^1J_{P,H} = 343$  Hz, 1H; PH), 7.28–7.24 (m, 6H; CPh<sub>3</sub>), 7.12–7.04 (m, 9H; CPh<sub>3</sub>), 2.75 (d,  $^3J_{P,H} = 12$  Hz, 3H; POCH<sub>3</sub>).  $^{31}P\{^1H\}$  NMR (121.51 MHz,  $C_6D_6$ , 298 K):  $\delta / ppm$

= 127.2 ( $s_{\text{sat}}$ ,  $^1J_{\text{W,P}} = 274$  Hz).  $^{31}\text{P}$  NMR (121.51 MHz,  $\text{C}_6\text{D}_6$ , 298 K):  $\delta$  / ppm = 127.2 ( $d_{\text{q,sat}}$ ,  $^1J_{\text{P,H}} = 343$  Hz,  $^3J_{\text{P,H}} = 13$  Hz,  $^1J_{\text{W,P}} = 274$  Hz).

### Generation of complex 3b

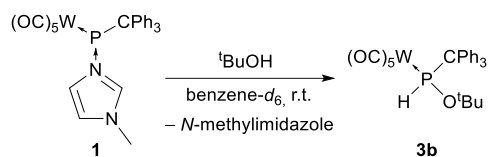

0.01 mL (0.11 mmol, 3.9 eq.) of *tert*-butanol was added to a solution of 0.018 g (0.03 mmol, 1.0 eq.) of complex **1**<sup>8</sup> in 0.5 mL of benzene- $d_6$ . The reaction mixture was shaken thoroughly for 30 seconds and then kept for 14 days at ambient temperature to obtain a yellow solution. The obtained analytical data were in accordance with similar alkoxyphosphane complexes in the literature.<sup>9</sup> Yield: 77% ( $^{31}\text{P}$  NMR integration).  $^1\text{H}$  NMR (400.13 MHz,  $\text{C}_6\text{D}_6$ , 298 K):  $\delta$  / ppm = 7.79 (d,  $^1J_{\text{P,H}} = 322$  Hz, 1H; PH), 7.39–7.36 (m, 6H; CPh<sub>3</sub>), 7.12–6.94 (m, 9H; CPh<sub>3</sub>), 0.83 (d,  $^4J_{\text{P,H}} = 1$  Hz, 9H; POC(CH<sub>3</sub>)<sub>3</sub>).  $^{31}\text{P}\{^1\text{H}\}$  NMR (162.00 MHz,  $\text{C}_6\text{D}_6$ , 298 K):  $\delta$  / ppm = 97.4 ( $s_{\text{sat}}$ ,  $^1J_{\text{W,P}} = 283$  Hz).  $^{31}\text{P}$  NMR (162.00 MHz,  $\text{C}_6\text{D}_6$ , 298 K):  $\delta$  / ppm = 97.4 ( $d_{\text{sat}}$ ,  $^1J_{\text{P,H}} = 322$  Hz,  $^1J_{\text{W,P}} = 283$  Hz).

### Synthesis of complex 10a

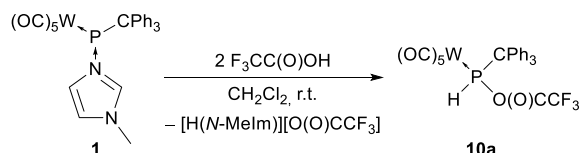

0.10 mL (1.30 mmol, 5.5 eq.) of trifluoroacetic acid was added dropwise to a solution of 0.16 g (0.2 mmol, 1.0 eq.) of complex **1**<sup>8</sup> in 30 mL of dichloromethane and the solution was stirred for 20.5 h at ambient temperature. Afterwards, all volatiles were removed *in vacuo* at ambient temperature within 30 minutes and the obtained pale yellow solid was further dried for 15 minutes. The product was extracted using three times 10 mL of *n*-pentane at ambient temperature via a filter cannular ( $\varnothing = 1$  mm) with a glass microfibre filter paper. All volatiles of the extract were removed *in vacuo* at ambient temperature. The obtained colourless solid was further dried for 2 h. Yield: 0.131 g (0.18 mmol, 78%). Mp 158 °C (dec.). Elemental analysis calcd (%) for  $\text{C}_{26}\text{H}_{16}\text{O}_7\text{F}_3\text{PW}$ : C 43.85, H 2.26; found: C 44.83, H 2.65. IR (ATR Diamond):  $\nu_{\text{max}}$  /  $\text{cm}^{-1}$  = 1930 (s) (CO), 1960 (s) (CO), 1999 (w) (CO), 2079 (m) (CO).  $^1\text{H}$  NMR (500.04 MHz,  $\text{C}_6\text{D}_6$ , 298 K):  $\delta$  / ppm = 8.42 ( $d_{\text{sat}}$ ,  $^1J_{\text{P,H}} = 362$  Hz,  $^2J_{\text{W,H}} = 7$  Hz, 1H; PH), 7.23–7.12 (m, 6H; CPh<sub>3</sub>), 7.05–6.99 (m, 9H; CPh<sub>3</sub>).  $^{13}\text{C}\{^1\text{H}\}$  NMR (125.52 MHz,  $\text{C}_6\text{D}_6$ , 298 K):  $\delta$  / ppm = 197.1 (d,  $^2J_{\text{P,C}} = 34$  Hz; *trans*-CO), 194.7 ( $d_{\text{sat}}$ ,  $^2J_{\text{P,C}} = 7$  Hz,  $^1J_{\text{W,C}} = 126$  Hz; *cis*-CO), 153.7 (qd,  $^2J_{\text{F,C}} = 45$  Hz,  $^2J_{\text{P,C}} = 12$  Hz; OOCF<sub>3</sub>), 140.2 (br s; *ipso*-C), 130.4 (br s; Ph), 129.1 (s; Ph), 128.5 (s; Ph), 114.7 (q,  $^1J_{\text{F,C}} = 287$  Hz; OOCF<sub>3</sub>), 65.2 (d,  $^1J_{\text{P,C}} = 16$  Hz; CPh<sub>3</sub>).  $^{19}\text{F}\{^1\text{H}\}$  NMR (469.65 MHz,  $\text{C}_6\text{D}_6$ , 298 K):  $\delta$  / ppm = -75.4 (s).  $^{31}\text{P}\{^1\text{H}\}$

NMR (202.44 MHz, C<sub>6</sub>D<sub>6</sub>, 298 K):  $\delta$  / ppm = 112.1 ( $s_{\text{sat}}$ ,  $^1J_{\text{W,P}} = 285$  Hz).  $^{31}\text{P}$  NMR (202.44 MHz, C<sub>6</sub>D<sub>6</sub>, 298 K):  $\delta$  / ppm = 112.1 ( $d_{\text{sat}}$ ,  $^1J_{\text{P,H}} = 362$  Hz,  $^1J_{\text{W,P}} = 285$  Hz). MS (LIFDI, selected data):  $m/z$  (%) = 712.2 (100)  $[\text{M}]^+$ , 243.2 (50)  $[\text{CPh}_3]^+$ .

### Synthesis of complex 10a-Cr

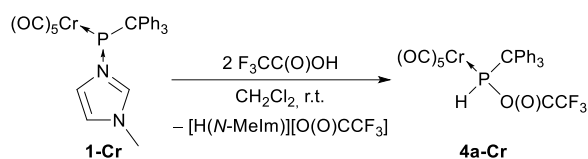

0.11 mL (1.43 mmol, 5.9 eq.) of trifluoroacetic acid was added dropwise to a solution of 0.133 g (0.24 mmol, 1.0 eq.) of complex **1-Cr**<sup>8</sup> in 10 mL of dichloromethane and the solution was stirred for 3.5 h at ambient temperature. Afterwards, all volatiles were removed *in vacuo* at ambient temperature within 7 minutes and the obtained pale yellow solid was further dried for 50 minutes. The product was extracted using six times 3 mL of *n*-pentane at ambient temperature via a filter cannula ( $\varnothing = 1$  mm) with a glass microfibre filter paper. All volatiles of the extract were removed *in vacuo* at ambient temperature. The obtained colourless solid was further dried for 1 h. Yield: 0.136 g (0.23 mmol, 96%). Mp 160 °C (dec.). Elemental analysis calcd (%) for C<sub>26</sub>H<sub>16</sub>O<sub>7</sub>F<sub>3</sub>PCr: C 53.81, H 2.78; found: C 54.26, H 2.95. IR (ATR Diamond):  $\nu_{\text{max}}$  / cm<sup>-1</sup> = 1944 (s) (CO), 1956 (s) (CO), 2003 (w) (CO), 2075 (m) (CO).  $^1\text{H}$  NMR (400.13 MHz, C<sub>6</sub>D<sub>6</sub>, 298 K):  $\delta$  / ppm = 8.19 (d,  $^1J_{\text{P,H}} = 350$  Hz, 1H; PH), 7.20–7.11 (m, 6H; CPh<sub>3</sub>), 7.06–6.97 (m, 9H; CPh<sub>3</sub>).  $^{13}\text{C}\{^1\text{H}\}$  NMR (100.63 MHz, C<sub>6</sub>D<sub>6</sub>, 298 K):  $\delta$  / ppm = 219.1 (d,  $^2J_{\text{P,C}} = 2$  Hz; *trans*-CO), 214.3 (d,  $^2J_{\text{P,C}} = 13$  Hz; *cis*-CO), 153.7 (qd,  $^2J_{\text{F,C}} = 45$  Hz,  $^2J_{\text{P,C}} = 13$  Hz; OOCF<sub>3</sub>), 140.3 (br s; *ipso*-C), 130.3 (br s; Ph), 129.1 (s; Ph), 128.5 (s; Ph), 114.6 (q,  $^1J_{\text{F,C}} = 287$  Hz; OOCF<sub>3</sub>), 66.9 (d,  $^1J_{\text{P,C}} = 10$  Hz; CPh<sub>3</sub>).  $^{19}\text{F}$  NMR (470.51 MHz, C<sub>6</sub>D<sub>6</sub>, 298 K):  $\delta$  / ppm = -75.5 (s).  $^{31}\text{P}\{^1\text{H}\}$  NMR (162.00 MHz, C<sub>6</sub>D<sub>6</sub>, 298 K):  $\delta$  / ppm = 164.8 (s).  $^{31}\text{P}$  NMR (162.00 MHz, C<sub>6</sub>D<sub>6</sub>, 298 K):  $\delta$  / ppm = 164.8 (d,  $^1J_{\text{P,H}} = 350$  Hz). MS (LIFDI, selected data):  $m/z$  (%) = 580.1 (100)  $[\text{M}]^+$ , 243.2 (5)  $[\text{CPh}_3]^+$ . MS (ESI neg., selected data):  $m/z$  (%) = 578.993 (21)  $[\text{M-H}]^-$ . HRMS (ESI neg.):  $m/z$  calcd for  $[\text{C}_{26}\text{H}_{15}\text{O}_7\text{F}_3\text{PCr}]^-$ : 578.9921; found: 578.9930.

### Synthesis of complex 10b

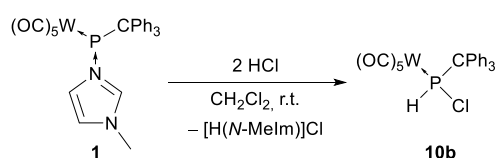

0.16 mL (0.32 mmol, 2.5 eq.) of a hydrogen chloride solution ( $c = 2$  M in diethyl ether) was added to a solution of 0.086 g (0.13 mmol, 1.0 eq.) of complex **1**<sup>8</sup> in 8.0 mL of dichloromethane and the formed pale yellow suspension was stirred for 1 hour at ambient temperature. Afterwards, all volatiles were removed *in vacuo* at ambient temperature within 10 minutes and the obtained pale yellow solid was

further dried for 10 minutes. The product was extracted using three times 5.0 mL of diethyl ether at ambient temperature via a filter cannula ( $\varnothing = 1$  mm) with a glass microfibre filter paper. All volatiles of the extract were removed *in vacuo* at ambient temperature. The obtained colourless solid was further dried for 30 minutes at ambient temperature. The obtained analytical data were in accordance with the literature.<sup>11</sup> Yield: 0.081 g (0.13 mmol, 100%) (Lit.:<sup>11</sup> 53%).  $^{31}\text{P}\{^1\text{H}\}$  NMR (121.51 MHz,  $\text{CH}_2\text{Cl}_2$ , 298 K):  $\delta$  / ppm = 71.2 ( $s_{\text{sat}}$ ,  $^1J_{\text{W,P}} = 271$  Hz).  $^{31}\text{P}$  NMR (121.51 MHz,  $\text{CH}_2\text{Cl}_2$ , 298 K):  $\delta$  / ppm = 71.2 ( $d_{\text{sat}}$ ,  $^1J_{\text{P,H}} = 345$  Hz,  $^1J_{\text{W,P}} = 271$  Hz).

### Synthesis of complex 11a

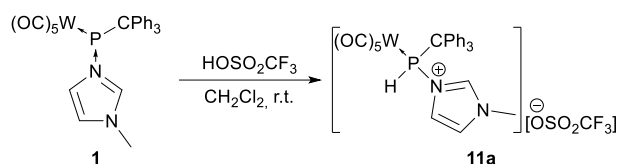

0.02 mL (0.23 mmol, 1.1 eq.) of trifluoromethanesulfonic acid was added dropwise to a solution of 0.145 g (0.21 mmol, 1.0 eq.) of complex **1**<sup>8</sup> in 10 mL of dichloromethane and the solution was stirred for 1.5 h at ambient temperature. Afterwards, 10 mL of *n*-pentane were added to the reaction solution forming a colourless suspension. After additional stirring for 1 minute, the solid transformed to a yellow oil. All volatiles were removed *in vacuo* at ambient temperature within 15 minutes and the obtained pale yellow solid was further dried for 2 h. After the addition of 10 mL of diethyl ether the solid formed a yellow oil. The mixture was stirred for 10 minutes obtaining a pale yellow suspension. The supernatant was filtered off using a filter cannula ( $\varnothing = 1$  mm) with a Whatman® 595 filter paper. The pale yellow solid residue was washed two times using 10 mL of diethyl ether and three times using 10 mL of *n*-pentane at ambient temperature. The obtained colourless solid was dried for 19 h *in vacuo* at ambient temperature. Yield: 0.153 g (0.18 mmol, 86%). Mp 142 °C (dec.). Elemental analysis calcd (%) for  $\text{C}_{29}\text{H}_{22}\text{N}_2\text{O}_8\text{F}_3\text{PSW}$ : C 41.95, H 2.67, N 3.37, S 3.86; found: C 42.13, H 2.83, N 3.42, S 3.92. IR (ATR Diamond):  $\nu_{\text{max}}$  /  $\text{cm}^{-1}$  = 1932 (s) (CO), 1940 (m) (CO), 2001 (w) (CO), 2081 (m) (CO).  $^1\text{H}$  NMR (500.04 MHz,  $\text{CD}_2\text{Cl}_2$ , 298 K):  $\delta$  / ppm = 9.41 (d,  $^1J_{\text{P,H}} = 373$  Hz, 1H; PH), 9.12 (s, 1H; Im-H), 7.46–7.36 (m, 15H;  $\text{CPh}_3$ ), 7.30 (br s, 1H; Im-H), 6.48–6.46 (m, 1H; Im-H), 3.87 (s, 3H;  $\text{CH}_3$ ).  $^{13}\text{C}\{^1\text{H}\}$  NMR (125.75 MHz,  $\text{CD}_2\text{Cl}_2$ , 298 K):  $\delta$  / ppm = 196.5 ( $d_{\text{sat}}$ ,  $^2J_{\text{P,C}} = 35$  Hz,  $^1J_{\text{W,C}} = 143$  Hz; *trans*-CO), 194.5 ( $d_{\text{sat}}$ ,  $^2J_{\text{P,C}} = 6$  Hz,  $^1J_{\text{W,C}} = 127$  Hz; *cis*-CO), 141.2 (s; Im), 139.8 (br s; *ipso*-C), 130.4 (br s; Ph), 129.7 (s; Ph), 129.0 (s; Ph), 125.3 (s; Im), 125.2 (s; Im), 121.1 (q,  $^1J_{\text{F,C}} = 320$  Hz;  $\text{CF}_3$ ), 64.7 (d,  $^1J_{\text{P,C}} = 8$  Hz;  $\text{CPh}_3$ ), 37.1 (s;  $\text{CH}_3$ ).  $^{15}\text{N}\{^1\text{H}\}$  NMR (50.68 MHz,  $\text{CD}_2\text{Cl}_2$ , 298 K):  $\delta$  / ppm = -200.3 (s; N-P), -205.0 (s; N- $\text{CH}_3$ ).  $^{19}\text{F}$  NMR (470.51 MHz,  $\text{CD}_2\text{Cl}_2$ , 298 K):  $\delta$  / ppm = -79.0 (s).  $^{31}\text{P}\{^1\text{H}\}$  NMR (202.44 MHz,  $\text{CD}_2\text{Cl}_2$ , 298 K):  $\delta$  / ppm = 65.5 ( $s_{\text{sat}}$ ,  $^1J_{\text{W,P}} = 278$  Hz).  $^{31}\text{P}$  NMR (202.44 MHz,  $\text{CD}_2\text{Cl}_2$ , 298 K):  $\delta$  / ppm = 65.5 ( $d_{\text{sat}}$ ,  $^1J_{\text{P,H}} = 373$  Hz,  $^1J_{\text{W,P}} = 278$  Hz). MS (ESI pos., selected data):  $m/z$  (%) = 681.076 (100) [ $\text{W}(\text{CO})_5\{\text{P}(\text{CPh}_3)(\text{H})(\text{N-MeIm})\}]^+$ , 243.117 (11) [ $\text{CPh}_3$ ] $^+$ . MS (ESI



neg., selected data):  $m/z$  (%) = 149.0 (100)  $[\text{OSO}_2\text{CF}_3]^-$ . HRMS (ESI pos.):  $m/z$  calcd for  $[\text{C}_{28}\text{H}_{22}\text{N}_2\text{O}_5\text{PW}]^+$ : 681.0775; found: 681.0774.

### Synthesis of complex 11a-Cr

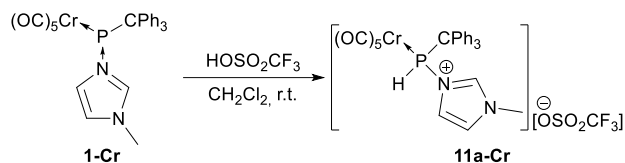

0.03 mL (0.34 mmol, 1.2 eq.) of trifluoromethanesulfonic acid was added dropwise to a solution of 0.161 g (0.29 mmol, 1.0 eq.) of complex **1-Cr**<sup>8</sup> in 10 mL of dichloromethane and the solution was stirred for 2 h at ambient temperature. Afterwards, 26 mL of *n*-pentane were added to the reaction solution forming a colourless suspension. After additional stirring for 1 minute, the solid transformed to a yellow oil. All volatiles were removed *in vacuo* at ambient temperature within 8 minutes and the obtained colourless and blue-green solids were further dried for 1.5 h. After the addition of 10 mL of diethyl ether, the solids formed a yellow oil. The mixture was stirred for 20 minutes obtaining a pale yellow suspension. The supernatant was filtered off using a filter cannula ( $\varnothing = 1$  mm) with a Whatman<sup>®</sup> 595 filter paper. The pale yellow solid residue was washed two times using 10 mL of diethyl ether and four times using 10 mL of *n*-pentane at ambient temperature. The obtained pale yellow solid was dried for 16.5 h *in vacuo* at ambient temperature. Yield: 0.181 g (0.26 mmol, 88%). Mp 144 °C (dec.). Elemental analysis calcd (%) for  $\text{C}_{29}\text{H}_{22}\text{N}_2\text{O}_8\text{F}_3\text{PSCr}$ : C 49.86, H 3.17, N 4.01, S 4.59; found: C 49.53, H 3.21, N 4.07, S 4.60. IR (ATR Diamond):  $\nu_{\text{max}} / \text{cm}^{-1} = 1941$  (s) (CO), 1972 (m) (CO), 2001 (w) (CO), 2076 (m) (CO). <sup>1</sup>H NMR (500.04 MHz,  $\text{CD}_2\text{Cl}_2$ , 298 K):  $\delta / \text{ppm} = 9.11$  (s, 1H; Im-*H*), 8.94 (d, <sup>1</sup> $J_{\text{P,H}} = 362$  Hz, 1H; PH), 7.47–7.40 (m, 9H; CPh<sub>3</sub>), 7.34–7.32 (m, 7H; CPh<sub>3</sub> & Im-*H*), 6.49 (s, 1H; Im-*H*), 3.87 (s, 3H; CH<sub>3</sub>). <sup>13</sup>C{<sup>1</sup>H} NMR (125.75 MHz,  $\text{CD}_2\text{Cl}_2$ , 298 K):  $\delta / \text{ppm} = 218.8$  (d, <sup>2</sup> $J_{\text{P,C}} = 1$  Hz; *trans*-CO), 214.0 (d, <sup>2</sup> $J_{\text{P,C}} = 12$  Hz; *cis*-CO), 141.2 (d, <sup>2</sup> $J_{\text{P,C}} = 4$  Hz; Im), 139.9 (br s; *ipso*-C), 130.3 (br s; Ph), 129.7 (s; Ph), 129.1 (s; Ph), 125.5 (d, <sup>3</sup> $J_{\text{P,C}} = 2$  Hz; Im), 124.9 (d, <sup>2</sup> $J_{\text{P,C}} = 5$  Hz; Im), 121.3 (q, <sup>1</sup> $J_{\text{F,C}} = 321$  Hz; CF<sub>3</sub>), 66.0 (d, <sup>1</sup> $J_{\text{P,C}} = 3$  Hz; CPh<sub>3</sub>), 37.1 (s; CH<sub>3</sub>). <sup>15</sup>N{<sup>1</sup>H} NMR (50.68 MHz,  $\text{CD}_2\text{Cl}_2$ , 298 K):  $\delta / \text{ppm} = -200.3$  (s; N-P),  $-205.8$  (s; N-CH<sub>3</sub>). <sup>19</sup>F NMR (470.51 MHz,  $\text{CD}_2\text{Cl}_2$ , 298 K):  $\delta / \text{ppm} = -78.9$  (s). <sup>31</sup>P{<sup>1</sup>H} NMR (202.44 MHz,  $\text{CD}_2\text{Cl}_2$ , 298 K):  $\delta / \text{ppm} = 116.4$  (s). <sup>31</sup>P NMR (202.44 MHz,  $\text{CD}_2\text{Cl}_2$ , 298 K):  $\delta / \text{ppm} = 116.4$  (d, <sup>1</sup> $J_{\text{P,H}} = 362$  Hz). MS (ESI pos., selected data):  $m/z$  (%) = 549.071 (100)  $[\text{Cr}(\text{CO})_5\{\text{P}(\text{CPh}_3)(\text{H})(\text{N-MeIm})\}]^+$ , 357.155 (3)  $[\text{P}(\text{CPh}_3)(\text{H})(\text{N-MeIm})]^+$ , 243.119 (51)  $[\text{CPh}_3]^+$ . MS (ESI neg., selected data):  $m/z$  (%) = 149.1 (100)  $[\text{OSO}_2\text{CF}_3]^-$ . HRMS (ESI pos.):  $m/z$  calcd for  $[\text{C}_{28}\text{H}_{22}\text{N}_2\text{O}_5\text{PCr}]^+$ : 549.0666; found: 549.0676.

### Synthesis of complex 11b

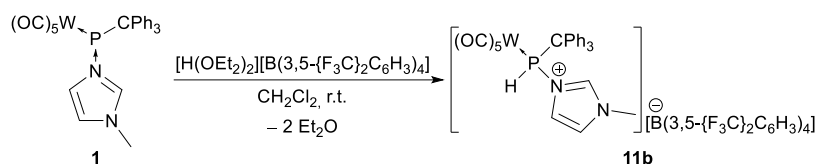

A solution of 0.1225 g (0.18 mmol, 1.0 eq.) of complex **1**<sup>8</sup> and 0.1847 g (0.18 mmol, 1.0 eq.) of [H(OEt<sub>2</sub>)<sub>2</sub>][B(3,5-{F<sub>3</sub>C}<sub>2</sub>C<sub>6</sub>H<sub>3</sub>)<sub>4</sub>]<sup>12</sup> in 10 mL of dichloromethane was stirred for 1.5 h at ambient temperature. Afterwards, 60 mL of *n*-pentane were added to the reaction solution forming a colourless suspension with brown oil. The supernatant was filtered off using a filter cannula ( $\varnothing = 1$  mm) with a Whatman<sup>®</sup> 595 filter paper. The pale brown residue was washed once with 5.0 mL of *n*-pentane at  $-40$  °C. The obtained pale yellow solid was dried for 3.5 h *in vacuo* at ambient temperature. Yield: 0.251 g (0.16 mmol, 90%). Mp 84 °C (dec.). Elemental analysis calcd (%) for C<sub>60</sub>H<sub>34</sub>BN<sub>2</sub>O<sub>5</sub>F<sub>24</sub>PW: C 46.66, H 2.22, N 1.81; found: C 46.86, H 2.56, N 1.93. IR (ATR Diamond):  $\nu_{\text{max}} / \text{cm}^{-1} = 1949$  (s) (CO), 1963 (m) (CO), 2001 (w) (CO), 2086 (m) (CO). <sup>1</sup>H NMR (500.04 MHz, CD<sub>2</sub>Cl<sub>2</sub>, 298 K):  $\delta / \text{ppm} = 8.84$  (d, <sup>1</sup>J<sub>P,H</sub> = 353 Hz, 1H; PH), 7.75–7.73 (m, 8H; *ortho*-CH<sup>BARF</sup>), 7.57 (s, 4H; *para*-CH<sup>BARF</sup>), 7.48–7.44 (m, 9H; CPh<sub>3</sub>), 7.28–7.23 (m, 7H; CPh<sub>3</sub> & Im-*H*), 7.19–7.17 (m, 1H; Im-*H*), 7.08 (br s, 1H; Im-*H*), 3.76 (s, 3H; CH<sub>3</sub>). <sup>11</sup>B{<sup>1</sup>H} NMR (160.43 MHz, CD<sub>2</sub>Cl<sub>2</sub>, 298 K):  $\delta / \text{ppm} = -6.6$  (s). <sup>13</sup>C{<sup>1</sup>H} NMR (125.75 MHz, CD<sub>2</sub>Cl<sub>2</sub>, 298 K):  $\delta / \text{ppm} = 195.1$  (d<sub>sat</sub>, <sup>2</sup>J<sub>P,C</sub> = 36 Hz, <sup>1</sup>J<sub>W,C</sub> = 141 Hz; *trans*-CO), 194.3 (d<sub>sat</sub>, <sup>2</sup>J<sub>P,C</sub> = 6 Hz, <sup>1</sup>J<sub>W,C</sub> = 127 Hz; *cis*-CO), 162.2 (q\*, <sup>1</sup>J<sub>C,B</sub> = 50 Hz; *ipso*-C<sup>BARF</sup>), 139.4 (br s; *ipso*-C<sup>Ph</sup>), 138.3 (s; Im), 135.2 (s; *ortho*-C<sup>BARF</sup>), 130.3 (br s; Ph), 130.1 (s; Ph), 129.8 (d, J<sub>P,C</sub> = 2 Hz; Ph), 129.3 (qq\*, <sup>2</sup>J<sub>F,C</sub> = 32 Hz, <sup>3</sup>J<sub>C,B</sub> = 3 Hz; *meta*-C<sup>BARF</sup>), 126.4 (s; Im), 125.2 (d, J<sub>P,C</sub> = 2 Hz; Im), 125.0 (q, <sup>1</sup>J<sub>F,C</sub> = 272 Hz; CF<sub>3</sub>), 117.9 (sept, <sup>3</sup>J<sub>F,C</sub> = 4 Hz; *para*-C<sup>BARF</sup>), 65.5 (d, <sup>1</sup>J<sub>P,C</sub> = 7 Hz; CPh<sub>3</sub>), 37.7 (s; CH<sub>3</sub>). <sup>15</sup>N{<sup>1</sup>H} NMR (50.68 MHz, CD<sub>2</sub>Cl<sub>2</sub>, 298 K):  $\delta / \text{ppm} = -194.6$  (s; N-P),  $-203.1$  (s; N-CH<sub>3</sub>). <sup>19</sup>F NMR (470.51 MHz, CD<sub>2</sub>Cl<sub>2</sub>, 298 K):  $\delta / \text{ppm} = -62.8$  (s). <sup>31</sup>P{<sup>1</sup>H} NMR (202.44 MHz, CD<sub>2</sub>Cl<sub>2</sub>, 298 K):  $\delta / \text{ppm} = 77.7$  (s<sub>sat</sub>, <sup>1</sup>J<sub>W,P</sub> = 284 Hz). <sup>31</sup>P NMR (202.44 MHz, CD<sub>2</sub>Cl<sub>2</sub>, 298 K):  $\delta / \text{ppm} = 77.7$  (d<sub>sat</sub>, <sup>1</sup>J<sub>P,H</sub> = 353 Hz, <sup>1</sup>J<sub>W,P</sub> = 284 Hz). MS (ESI pos., selected data): *m/z* (%) = 681.084 (8) [W(CO)<sub>5</sub>{P(CPh<sub>3</sub>)(H)(N-MeIm)}]<sup>+</sup>, 599.030 (29) [W(CO)<sub>5</sub>{P(CPh<sub>3</sub>)H}]<sup>+</sup>, 571.035 (11) [W(CO)<sub>4</sub>{P(CPh<sub>3</sub>)H}]<sup>+</sup>, 543.040 (35) [W(CO)<sub>3</sub>{P(CPh<sub>3</sub>)H}]<sup>+</sup>, 515.044 (100) [W(CO)<sub>2</sub>{P(CPh<sub>3</sub>)H}]<sup>+</sup>, 487.050 (12) [W(CO){P(CPh<sub>3</sub>)H}]<sup>+</sup>, 459.054 (23) [W{P(CPh<sub>3</sub>)H}], 357.156 (24) [P(CPh<sub>3</sub>)(H)(N-MeIm)]<sup>+</sup>. MS (ESI neg., selected data): *m/z* (%) = 863.064 (100) [B(3,5-{F<sub>3</sub>C}<sub>2</sub>C<sub>6</sub>H<sub>3</sub>)<sub>4</sub>]<sup>-</sup>. HRMS (ESI pos.): *m/z* calcd for [C<sub>28</sub>H<sub>22</sub>N<sub>2</sub>O<sub>5</sub>PW]<sup>+</sup>: 681.0775; found: 681.0775.

## Synthesis of complex 11c

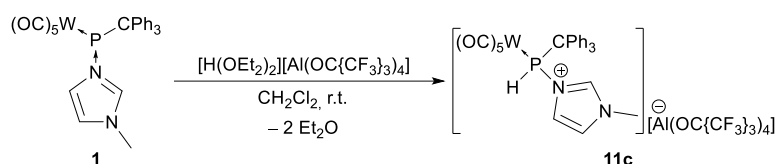

A solution of 0.109 g (0.16 mmol, 1.0 eq.) of complex **1**<sup>8</sup> and 0.178 g (0.16 mmol, 1.0 eq.) of  $[\text{H}(\text{OEt}_2)_2][\text{Al}(\text{OC}(\text{CF}_3)_3)_4]$ <sup>13</sup> in 16 mL of dichloromethane was stirred for 3 h at ambient temperature. Afterwards, 80 mL of *n*-pentane were added to the reaction solution forming a pale yellow suspension. The supernatant was filtered off using a filter cannula ( $\varnothing = 2$  mm) with a glass microfibre filter paper. The pale yellow residue was washed three times using 11 mL of a 10:1 *n*-pentane/dichloromethane mixture and two times using 5 mL of *n*-pentane at ambient temperature. The obtained colourless solid was dried for 14 h *in vacuo* at ambient temperature. Yield: 0.234 g (0.14 mmol, 89%). Mp 160 °C (dec.). Elemental analysis calcd (%) for  $\text{C}_{44}\text{H}_{22}\text{N}_2\text{O}_9\text{F}_{36}\text{AlPW}$ : C 32.06, H 1.35, N 1.70; found: C 31.32, H 1.56, N 1.73. IR (ATR Diamond):  $\nu_{\text{max}} / \text{cm}^{-1} = 1949$  (s) (CO), 1963 (m) (CO), 2009 (w) (CO), 2085 (m) (CO).  $^1\text{H}$  NMR (400.13 MHz,  $\text{CD}_2\text{Cl}_2$ , 298 K):  $\delta / \text{ppm} = 8.84$  (d,  $^1J_{\text{P,H}} = 353$  Hz, 1H; PH), 7.49–7.48 (m, 9H;  $\text{CPh}_3$ ), 7.29–7.25 (m, 7H;  $\text{CPh}_3$  & Im-H), 7.20–7.19 (m, 1H; Im-H), 7.08 (br s, 1H; Im-H), 3.81 (s, 3H;  $\text{CH}_3$ ).  $^{13}\text{C}\{^1\text{H}\}$  NMR (100.63 MHz,  $\text{CD}_2\text{Cl}_2$ , 298 K):  $\delta / \text{ppm} = 195.1$  (d,  $^2J_{\text{P,C}} = 36$  Hz; *trans*-CO), 194.3 (d,  $^2J_{\text{P,C}} = 6$  Hz; *cis*-CO), 139.3 (br s; *ispo*-C), 138.3 (s; Im), 130.3 (br d,  $J_{\text{P,C}} = 9$  Hz; Ph), 130.1 (s; Ph), 129.8 (d,  $J_{\text{P,C}} = 2$  Hz; Ph), 126.4 (s; Im), 126.0 (s;  $\text{C}(\text{CF}_3)_3$ ), 125.2 (d,  $J_{\text{P,C}} = 2$  Hz; Im), 121.7 (q,  $^1J_{\text{F,C}} = 293$  Hz;  $\text{CF}_3$ ), 65.5 (d,  $^1J_{\text{P,C}} = 7$  Hz;  $\text{CPh}_3$ ), 37.8 (s;  $\text{CH}_3$ ).  $^{15}\text{N}\{^1\text{H}\}$  NMR (50.68 MHz,  $\text{CD}_2\text{Cl}_2$ , 298 K):  $\delta / \text{ppm} = -195.7$  (s; N-P),  $-204.2$  (s; N- $\text{CH}_3$ ).  $^{19}\text{F}$  NMR (470.51 MHz,  $\text{CD}_2\text{Cl}_2$ , 298 K):  $\delta / \text{ppm} = -75.7$  (s).  $^{27}\text{Al}\{^1\text{H}\}$  NMR (78.20 MHz,  $\text{CD}_2\text{Cl}_2$ , 298 K):  $\delta / \text{ppm} = 34.7$  (s).  $^{31}\text{P}\{^1\text{H}\}$  NMR (162.00 MHz,  $\text{CD}_2\text{Cl}_2$ , 298 K):  $\delta / \text{ppm} = 77.8$  ( $s_{\text{sat}}$ ,  $^1J_{\text{W,P}} = 284$  Hz).  $^{31}\text{P}$  NMR (162.00 MHz,  $\text{CD}_2\text{Cl}_2$ , 298 K):  $\delta / \text{ppm} = 77.8$  ( $d_{\text{sat}}$ ,  $^1J_{\text{P,H}} = 354$  Hz,  $^1J_{\text{W,P}} = 284$  Hz). MS (ESI pos., selected data):  $m/z$  (%) = 681.077 (<1)  $[\text{W}(\text{CO})_5\{\text{P}(\text{CPh}_3)(\text{H})(\text{N-MeIm})\}]^+$ , 243.116 (100)  $[\text{CPh}_3]^+$ . MS (ESI neg., selected data):  $m/z$  (%) = 966.907 (100)  $[\text{Al}(\text{OC}(\text{CF}_3)_3)_4]^-$ . HRMS (ESI pos.):  $m/z$  calcd for  $[\text{C}_{28}\text{H}_{22}\text{N}_2\text{O}_5\text{PW}]^+$ : 681.0775; found: 681.0782.

## Synthesis of complex 11c-Cr

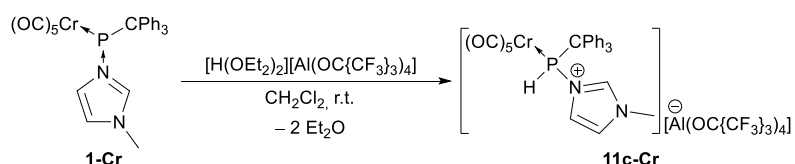

A solution of 0.167 g (0.30 mmol, 1.0 eq.) of complex **1-Cr**<sup>8</sup> and 0.339 g (0.30 mmol, 1.0 eq.) of  $[H(OEt_2)_2][Al(OC\{CF_3\}_3)_4]$ <sup>13</sup> in 16 mL of dichloromethane was stirred for 3 h at ambient temperature. Afterwards, 100 mL of *n*-pentane were added to the reaction solution forming a yellow suspension. The supernatant was filtered off using a filter cannula ( $\varnothing = 2$  mm) with a Whatman<sup>®</sup> 595 filter paper. The pale yellow residue was washed three times using 11 mL of a 10:1 *n*-pentane/dichloromethane mixture and three times using 10 mL of *n*-pentane at ambient temperature. The obtained pale yellow solid was dried for 19 h *in vacuo* at ambient temperature. Yield: 0.44 g (0.29 mmol, 96%). Mp 151 °C (dec.). Elemental analysis calcd (%) for  $C_{44}H_{22}N_2O_9F_{36}AlPCr$ : C 34.85, H 1.46, N 1.85; found: C 33.50, H 1.52, N 1.84. IR (ATR Diamond):  $\nu_{max} / cm^{-1} = 1953$  (s) (CO), 1969 (s) (CO), 2014 (w) (CO), 2079 (m) (CO). <sup>1</sup>H NMR (500.04 MHz, CD<sub>2</sub>Cl<sub>2</sub>, 298 K):  $\delta / ppm = 8.34$  (d, <sup>1</sup>J<sub>P,H</sub> = 341 Hz, 1H; PH), 7.50–7.49 (m, 9H; CPh<sub>3</sub>), 7.28 (m, 1H; Im-H), 7.26–7.18 (m, 6H; CPh<sub>3</sub>), 7.20–7.19 (m, 1H; Im-H), 7.03 (br s, 1H; Im-H), 3.80 (s, 3H; CH<sub>3</sub>). <sup>13</sup>C{<sup>1</sup>H} NMR (125.75 MHz, CD<sub>2</sub>Cl<sub>2</sub>, 298 K):  $\delta / ppm = 217.4$  (s; *trans*-CO), 213.8 (d, <sup>2</sup>J<sub>P,C</sub> = 11 Hz; *cis*-CO), 139.5 (br s; *ipso*-C), 138.2 (d, <sup>2</sup>J<sub>P,C</sub> = 5 Hz; Im), 130.2–129.9 (m; Ph); 126.3 (d, J<sub>P,C</sub> = 5 Hz; Im), 125.3 (s; Im), 121.7 (q, <sup>1</sup>J<sub>F,C</sub> = 293 Hz; CF<sub>3</sub>), 67.0 (d, <sup>1</sup>J<sub>P,C</sub> = 2 Hz; CPh<sub>3</sub>), 37.7 (d, <sup>4</sup>J<sub>P,C</sub> = 1 Hz; CH<sub>3</sub>). <sup>15</sup>N{<sup>1</sup>H} NMR (50.68 MHz, CD<sub>2</sub>Cl<sub>2</sub>, 298 K):  $\delta / ppm = -195.7$  (s; N-P), -204.2 (s; N-CH<sub>3</sub>). <sup>19</sup>F NMR (470.51 MHz, CD<sub>2</sub>Cl<sub>2</sub>, 298 K):  $\delta / ppm = -75.7$  (s). <sup>27</sup>Al{<sup>1</sup>H} NMR (130.29 MHz, CD<sub>2</sub>Cl<sub>2</sub>, 298 K):  $\delta / ppm = 34.6$  (s). <sup>31</sup>P{<sup>1</sup>H} NMR (202.44 MHz, CD<sub>2</sub>Cl<sub>2</sub>, 298 K):  $\delta / ppm = 132.0$  (s). <sup>31</sup>P NMR (202.44 MHz, CD<sub>2</sub>Cl<sub>2</sub>, 298 K):  $\delta / ppm = 132.0$  (d, <sup>1</sup>J<sub>P,H</sub> = 342 Hz). MS (ESI pos., selected data):  $m/z$  (%) = 549.067 (36) [Cr(CO)<sub>5</sub>{P(CPh<sub>3</sub>)(H)(N-MeIm)}]<sup>+</sup>. MS (ESI neg., selected data):  $m/z$  (%) = 966.9 (100) [Al(OC{CF<sub>3</sub>}\_3)\_4]<sup>-</sup>. HRMS (ESI pos.):  $m/z$  calcd for [C<sub>28</sub>H<sub>22</sub>N<sub>2</sub>O<sub>5</sub>PCr]<sup>+</sup>: 549.0666; found: 549.0669.

## Synthesis of complex 12

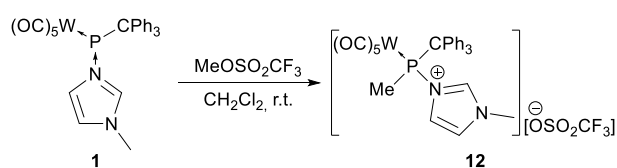

0.02 mL (0.18 mmol, 1.1 eq.) of methyl trifluoromethanesulfonate was added to a solution of 0.111 g (0.16 mmol, 1.0 eq.) of complex **1**<sup>8</sup> in 10 mL of dichloromethane at ambient temperature. The solution was stirred for 3 h at ambient temperature. After addition of 40 mL of *n*-pentane the formed colourless suspension was stirred for 2 h. The supernatant was filtered off using a filter cannula ( $\varnothing = 2$  mm) with

a Whatman® 595 filter paper and the colourless solid residue was washed three times with 4.0 mL of *n*-pentane. The solid was dried for 14 h *in vacuo* at ambient temperature. The product was isolated by recrystallization in 20 mL of a 1:1 diethylether/THF mixture at -40 °C. After the supernatant was filtered off using a filter cannula ( $\varnothing = 2$  mm) with a Whatman® 595 filter paper and washing the colourless solid three times with 3 mL of *n*-pentane at -40 °C. The product was dried for 75 minutes at ambient temperature. Yield: 0.078 g (0.09 mmol, 56%). Mp 155 °C (dec.). Elemental analysis calcd (%) for C<sub>30</sub>H<sub>24</sub>N<sub>2</sub>O<sub>8</sub>F<sub>3</sub>PSW: C 42.67, H 2.87, N 3.32, S 3.80; found: C 41.74, H 2.92, N 3.35, S 4.32. IR (ATR Diamond):  $\nu_{\max} / \text{cm}^{-1} = 1927$  (s) (CO), 1995 (w) (CO), 2079 (m) (CO). <sup>1</sup>H NMR (500.04 MHz, CD<sub>2</sub>Cl<sub>2</sub>, 298 K):  $\delta / \text{ppm} = 8.71$  (s, 1H; Im-H), 7.70–7.57 (m, 2H; CPh<sub>3</sub>), 7.54–7.35 (m, 9H; CPh<sub>3</sub>), 7.35–7.27 (m, 2H; CPh<sub>3</sub>), 7.25 (s, 1H; Im-H), 6.98–6.69 (m, 1H; Im-H), 6.65–6.55 (m, 2H; CPh<sub>3</sub>), 3.96 (s, 3H; N-CH<sub>3</sub>), 2.53 (d, <sup>2</sup>J<sub>P,H</sub> = 1 Hz, 3H; P-CH<sub>3</sub>). <sup>13</sup>C{<sup>1</sup>H} NMR (125.75 MHz, CD<sub>2</sub>Cl<sub>2</sub>, 298 K):  $\delta / \text{ppm} = 197.1$  (d, <sup>2</sup>J<sub>P,C</sub> = 34 Hz; *trans*-CO), 196.0 (d<sub>sat</sub>, <sup>2</sup>J<sub>P,C</sub> = 6 Hz, <sup>1</sup>J<sub>W,C</sub> = 127 Hz; *cis*-CO), 141.2 (br s; *ipso*-C), 139.9 (d, J<sub>P,C</sub> = 1 Hz; Im), 139.6 (br s; *ipso*-C), 137.3 (br s; *ipso*-C), 131.8–131.4 (m; Ph), 130.1–129.6 (m; Ph), 125.3 (d, J<sub>P,C</sub> = 5 Hz; Im), 125.1 (d, J<sub>P,C</sub> = 3 Hz; Im), 121.2 (q, <sup>1</sup>J<sub>F,C</sub> = 320 Hz; CF<sub>3</sub>), 68.1 (d, <sup>1</sup>J<sub>P,C</sub> = 2 Hz; CPh<sub>3</sub>), 37.5 (s; N-CH<sub>3</sub>), 26.1 (d, <sup>1</sup>J<sub>P,C</sub> = 20 Hz; P-CH<sub>3</sub>). <sup>15</sup>N{<sup>1</sup>H} NMR (50.68 MHz, CD<sub>2</sub>Cl<sub>2</sub>, 298 K):  $\delta / \text{ppm} = -191.4$  (s; N-P), -202.4 (s; N-CH<sub>3</sub>). <sup>19</sup>F NMR (470.51 MHz, CD<sub>2</sub>Cl<sub>2</sub>, 298 K):  $\delta / \text{ppm} = -79.0$  (s). <sup>31</sup>P{<sup>1</sup>H} NMR (202.44 MHz, CD<sub>2</sub>Cl<sub>2</sub>, 298 K):  $\delta / \text{ppm} = 116.4$  (s<sub>sat</sub>, <sup>1</sup>J<sub>W,P</sub> = 274 Hz). <sup>31</sup>P NMR (121.51 MHz, CD<sub>2</sub>Cl<sub>2</sub>, 298 K):  $\delta / \text{ppm} = 116.4$  (s<sub>sat</sub>, <sup>1</sup>J<sub>W,P</sub> = 274 Hz). MS (ESI pos., selected data): *m/z* (%) = 695.092 (4) [W(CO)<sub>5</sub>{P(CPh<sub>3</sub>)(Me)(N-MeIm)}<sup>+</sup>, 613.039 (3) [W(CO)<sub>5</sub>{P(CPh<sub>3</sub>)Me}]<sup>+</sup>, 585.044 (1) [W(CO)<sub>4</sub>{P(CPh<sub>3</sub>)Me}]<sup>+</sup>, 529.054 (1) [W(CO)<sub>2</sub>{P(CPh<sub>3</sub>)Me}]<sup>+</sup>, 501.059 (1) [W(CO){P(CPh<sub>3</sub>)Me}]<sup>+</sup>, 371.166 (12) [P(CPh<sub>3</sub>)(Me)(N-MeIm)]<sup>+</sup>, 289.113 (44) [P(CPh<sub>3</sub>)Me]<sup>+</sup>, 243.116 (100) [CPh<sub>3</sub>]<sup>+</sup>. MS (ESI neg., selected data): *m/z* (%) = 148.9 (100) [OSO<sub>2</sub>CF<sub>3</sub>]<sup>-</sup>. HRMS (ESI pos.): *m/z* calcd for [C<sub>29</sub>H<sub>24</sub>N<sub>2</sub>O<sub>5</sub>PW]<sup>+</sup>: 695.0928; found: 695.0921.

### Synthesis of complex 12-Cr

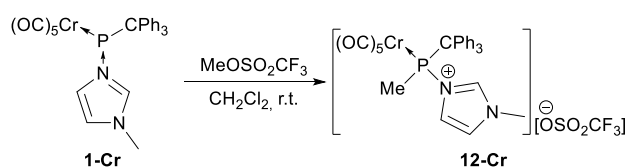

0.04 mL (0.37 mmol, 1.2 eq.) of methyl trifluoromethanesulfonate was added to a solution of 0.171 g (0.31 mmol, 1.0 eq.) of complex **1-Cr**<sup>8</sup> in 16 mL of dichloromethane at ambient temperature. The solution was stirred for 80 minutes in a glovebox. Afterwards, all volatiles were removed *in vacuo* at ambient temperature. The obtained yellow solid was redissolved in 15 mL of dichloromethane. After addition of 50 mL of *n*-pentane the formed yellow suspension was stirred for 3 minutes. The supernatant was filtered off using a filter cannula ( $\varnothing = 2$  mm) with a Whatman® 595 filter paper and the pale yellow solid residue was washed three times with 5.0 mL of *n*-pentane. The product was dried

for 2.5 h *in vacuo* at ambient temperature. Yield: 0.194 g (0.27 mmol, 87%). Mp 142 °C (dec.). Elemental analysis calcd (%) for C<sub>30</sub>H<sub>24</sub>N<sub>2</sub>O<sub>8</sub>F<sub>3</sub>PSCr: C 50.57, H 3.40, N 3.93, S 4.50; found: C 47.04, H 3.46, N 3.60, S 4.31. IR (ATR Diamond):  $\nu_{\max}$  / cm<sup>-1</sup> = 1934 (s) (CO), 1981 (m) (CO), 2001 (w) (CO), 2073 (m) (CO). <sup>1</sup>H NMR (500.04 MHz, CD<sub>2</sub>Cl<sub>2</sub>, 298 K):  $\delta$  / ppm = 8.66 (s, 1H; Im-H), 7.67–7.63 (m, 2H; CPh<sub>3</sub>), 7.56–7.45 (m, 6H; CPh<sub>3</sub>), 7.45–7.33 (m, 3H; CPh<sub>3</sub>), 7.28 (s, 1H; Im-H), 7.26–7.17 (m, 2H; CPh<sub>3</sub>), 6.58 (s, 1H; Im-H), 6.56–6.45 (m, 2H; CPh<sub>3</sub>), 3.97 (s, 3H; N-CH<sub>3</sub>), 2.28 (s, 3H; P-CH<sub>3</sub>). <sup>13</sup>C{<sup>1</sup>H} NMR (125.75 MHz, CD<sub>2</sub>Cl<sub>2</sub>, 298 K):  $\delta$  / ppm = 219.3 (d, <sup>2</sup>J<sub>P,C</sub> = 2 Hz; *trans*-CO), 214.8 (d, <sup>2</sup>J<sub>P,C</sub> = 11 Hz; *cis*-CO), 141.1 (br s; *ipso*-C), 139.8 (d, J<sub>P,C</sub> = 2 Hz; Im), 139.5 (br s; *ipso*-C), 137.8 (br s; *ipso*-C), 131.7–131.3 (m; Ph), 130.0–129.5 (m; Ph), 125.4 (d, J<sub>P,C</sub> = 2 Hz; Im), 124.9 (d, J<sub>P,C</sub> = 4 Hz; Im), 121.4 (br q, <sup>1</sup>J<sub>F,C</sub> = 324 Hz; CF<sub>3</sub>), 69.7 (d, <sup>1</sup>J<sub>P,C</sub> = 2 Hz; CPh<sub>3</sub>), 37.5 (s; N-CH<sub>3</sub>), 24.8 (d, <sup>1</sup>J<sub>P,C</sub> = 16 Hz; P-CH<sub>3</sub>). <sup>15</sup>N{<sup>1</sup>H} NMR (50.68 MHz, CD<sub>2</sub>Cl<sub>2</sub>, 298 K):  $\delta$  / ppm = -191.4 (s; N-P), -203.1 (s; N-CH<sub>3</sub>). <sup>19</sup>F NMR (470.51 MHz, CD<sub>2</sub>Cl<sub>2</sub>, 298 K):  $\delta$  / ppm = -78.8 (s). <sup>31</sup>P{<sup>1</sup>H} NMR (202.44 MHz, CD<sub>2</sub>Cl<sub>2</sub>, 298 K):  $\delta$  / ppm = 165.1 (s). <sup>31</sup>P NMR (202.44 MHz, CD<sub>2</sub>Cl<sub>2</sub>, 298 K):  $\delta$  / ppm = 165.1 (s). MS (ESI pos., selected data): *m/z* (%) = 563.082 (12) [Cr(CO)<sub>5</sub>{P(CPh<sub>3</sub>)(Me)(N-MeIm)}]<sup>+</sup>, 481.029 (7) [Cr(CO)<sub>5</sub>{P(CPh<sub>3</sub>)Me}]<sup>+</sup>, 425.039 (1) [Cr(CO)<sub>3</sub>{P(CPh<sub>3</sub>)Me}]<sup>+</sup>, 397.044 (8) [Cr(CO)<sub>2</sub>{P(CPh<sub>3</sub>)Me}]<sup>+</sup>, 382.081 (4) [Cr(CO)<sub>2</sub>(PCPh<sub>3</sub>)]<sup>+</sup>, 371.167 (100) [P(CPh<sub>3</sub>)(Me)(N-MeIm)]<sup>+</sup>, 289.114 (64) [P(CPh<sub>3</sub>)Me]<sup>+</sup>, 243.117 (26) [CPh<sub>3</sub>]<sup>+</sup>, 237.983 (1) [Cr(CO)<sub>5</sub>(PMe)]<sup>+</sup>. MS (ESI neg., selected data): *m/z* (%) = 149.0 (100) [OSO<sub>2</sub>CF<sub>3</sub>]<sup>-</sup>. HRMS (ESI pos.): *m/z* calcd for [C<sub>29</sub>H<sub>24</sub>N<sub>2</sub>O<sub>5</sub>PCr]<sup>+</sup>: 563.0825; found: 563.0820.

### 3 NMR spectra

#### Compound 2

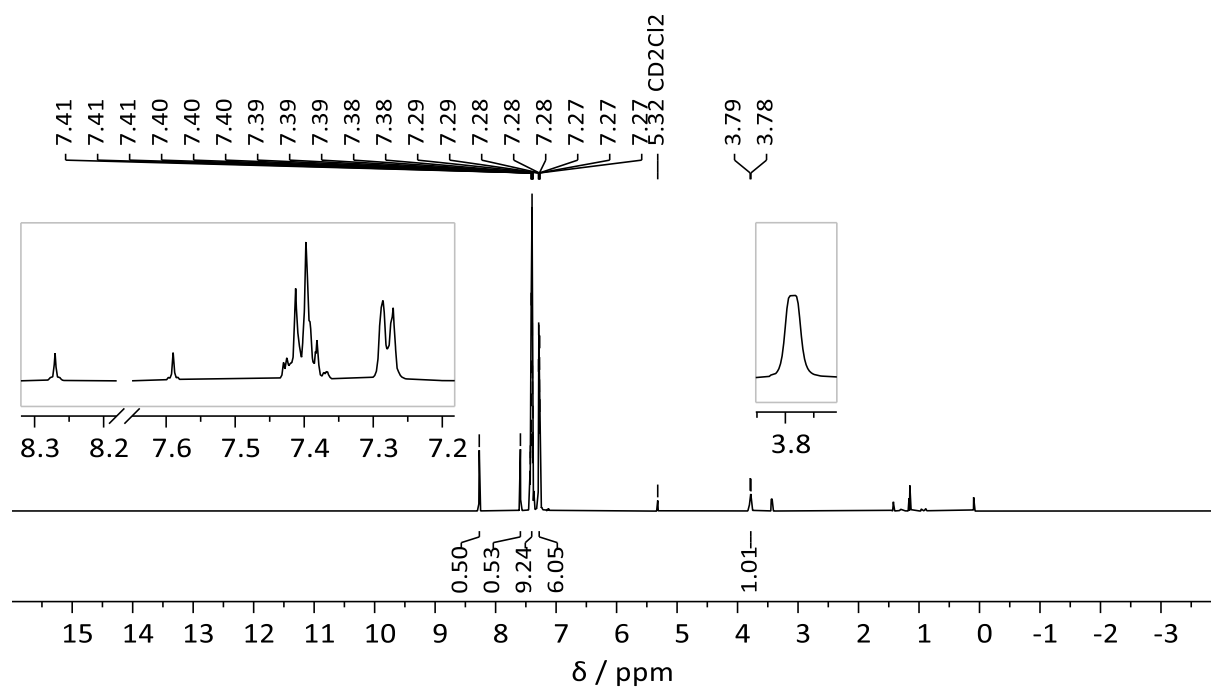

Fig. S1 <sup>1</sup>H NMR spectrum (500.04 MHz, CD<sub>2</sub>Cl<sub>2</sub>, 298 K) of compound 2.

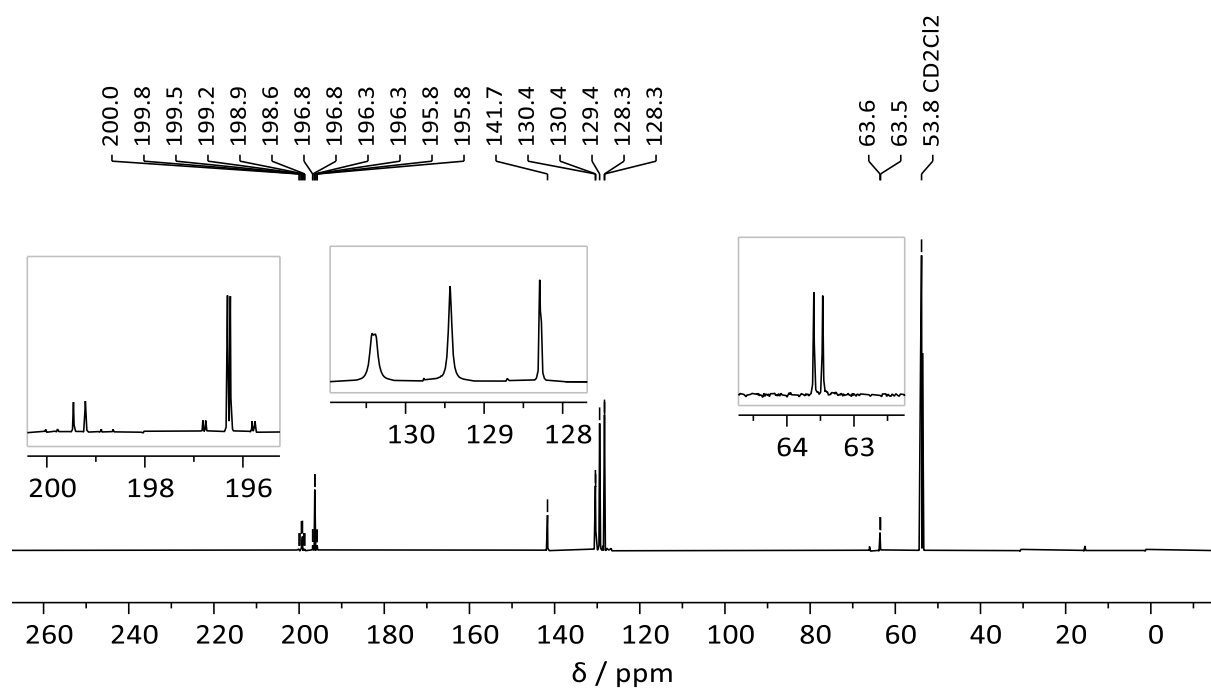

Fig. S2 <sup>13</sup>C{<sup>1</sup>H} NMR spectrum (125.75 MHz, CD<sub>2</sub>Cl<sub>2</sub>, 298 K) of compound 2.

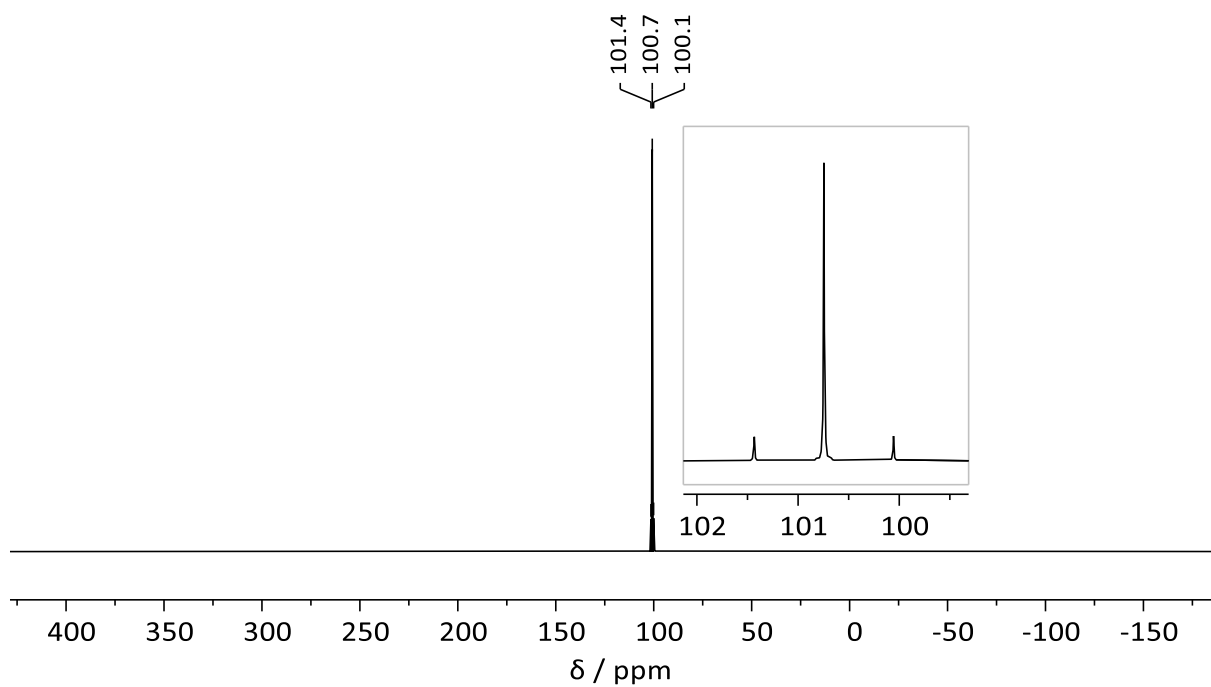

**Fig. S3** <sup>31</sup>P{<sup>1</sup>H} NMR spectrum (202.44 MHz, CD<sub>2</sub>Cl<sub>2</sub>, 298 K) of compound **2**.

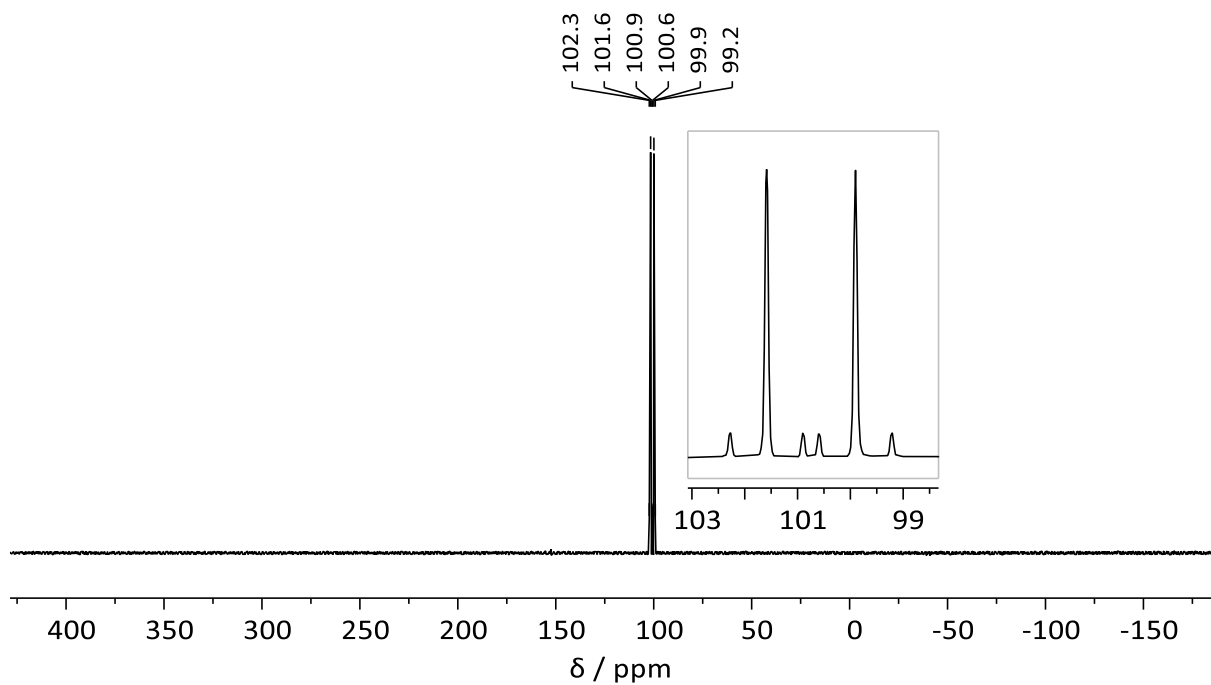

**Fig. S4** <sup>31</sup>P NMR spectrum (202.44 MHz, CD<sub>2</sub>Cl<sub>2</sub>, 298 K) of compound **2**.



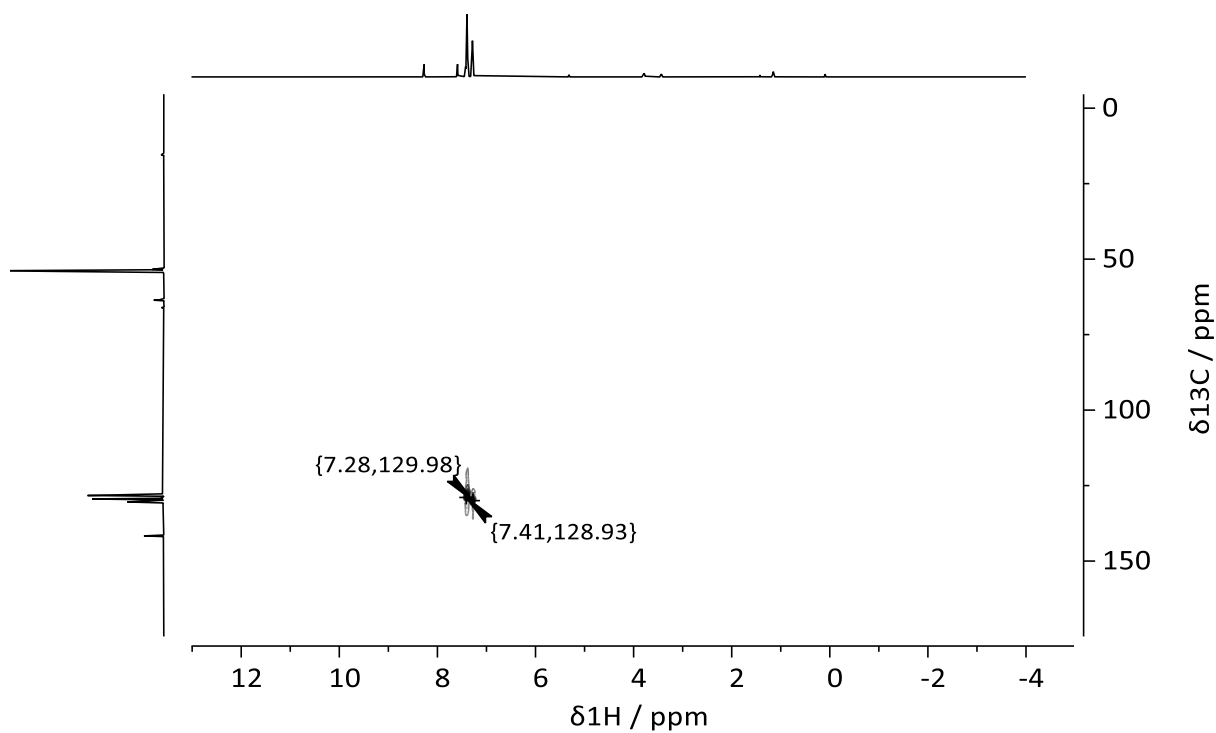

**Fig. S5**  $^1\text{H}$ ,  $^{13}\text{C}$  HSQC NMR spectrum (500.04 MHz, 125.75 MHz,  $\text{CD}_2\text{Cl}_2$ , 298 K) of compound **2**.

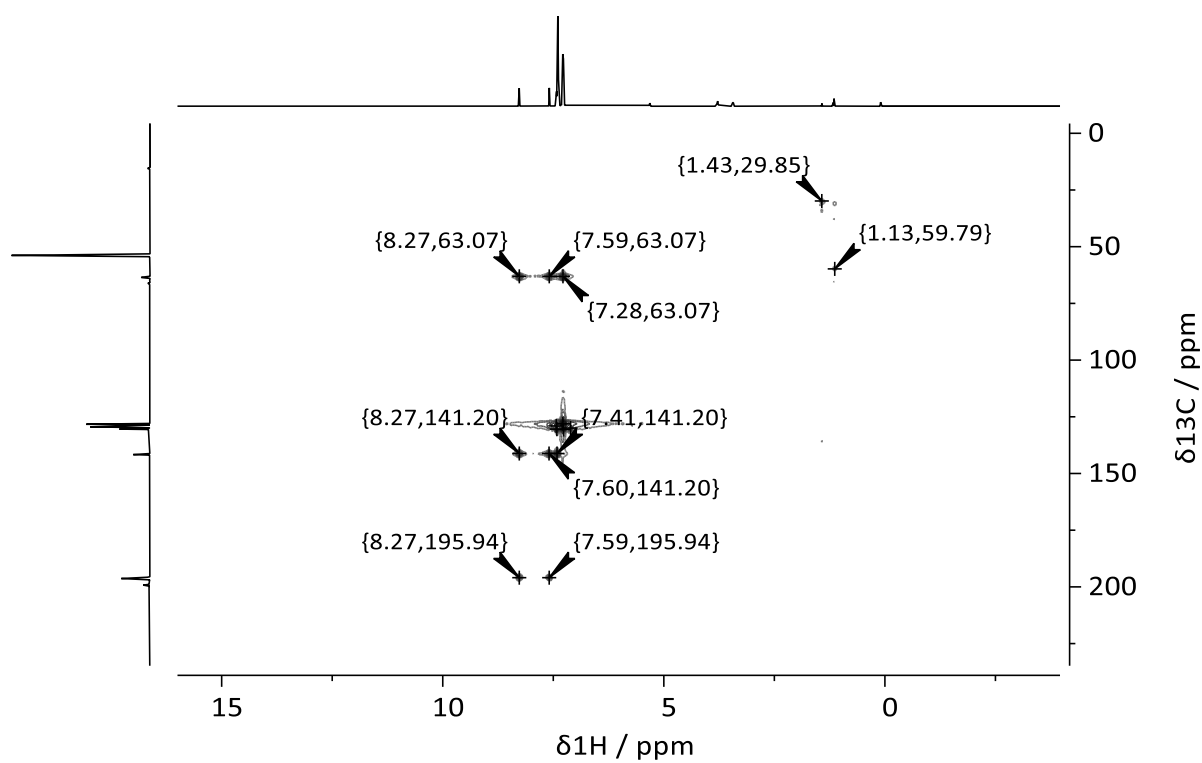

**Fig. S6**  $^1\text{H}$ ,  $^{13}\text{C}$  HMBC NMR spectrum (500.04 MHz, 125.75 MHz,  $\text{CD}_2\text{Cl}_2$ , 298 K) of compound **2**.

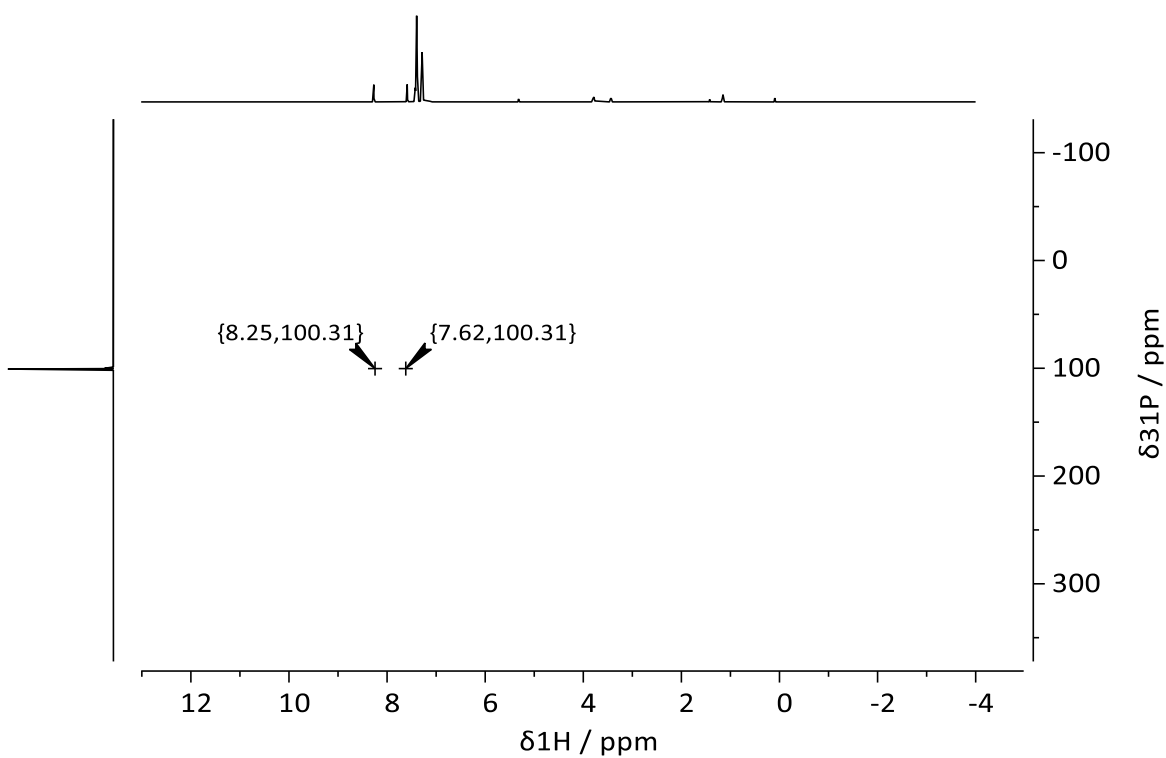

**Fig. S7**  $^1\text{H}$ ,  $^{31}\text{P}$  HMQC NMR spectrum (500.04 MHz, 202.44 MHz,  $\text{CD}_2\text{Cl}_2$ , 298 K) of compound **2**.

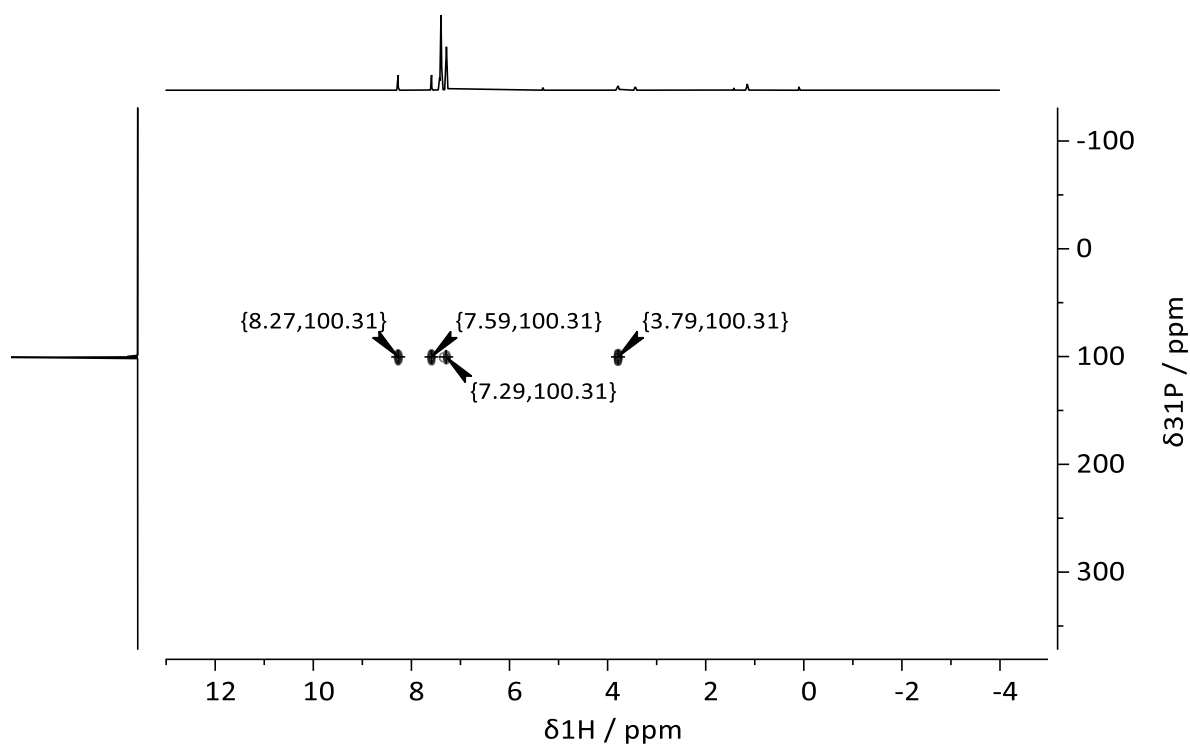

**Fig. S8**  $^1\text{H}$ ,  $^{31}\text{P}$  HMBC NMR spectrum (500.04 MHz, 202.44 MHz,  $\text{CD}_2\text{Cl}_2$ , 298 K) of compound **2**.

### Compound 3a

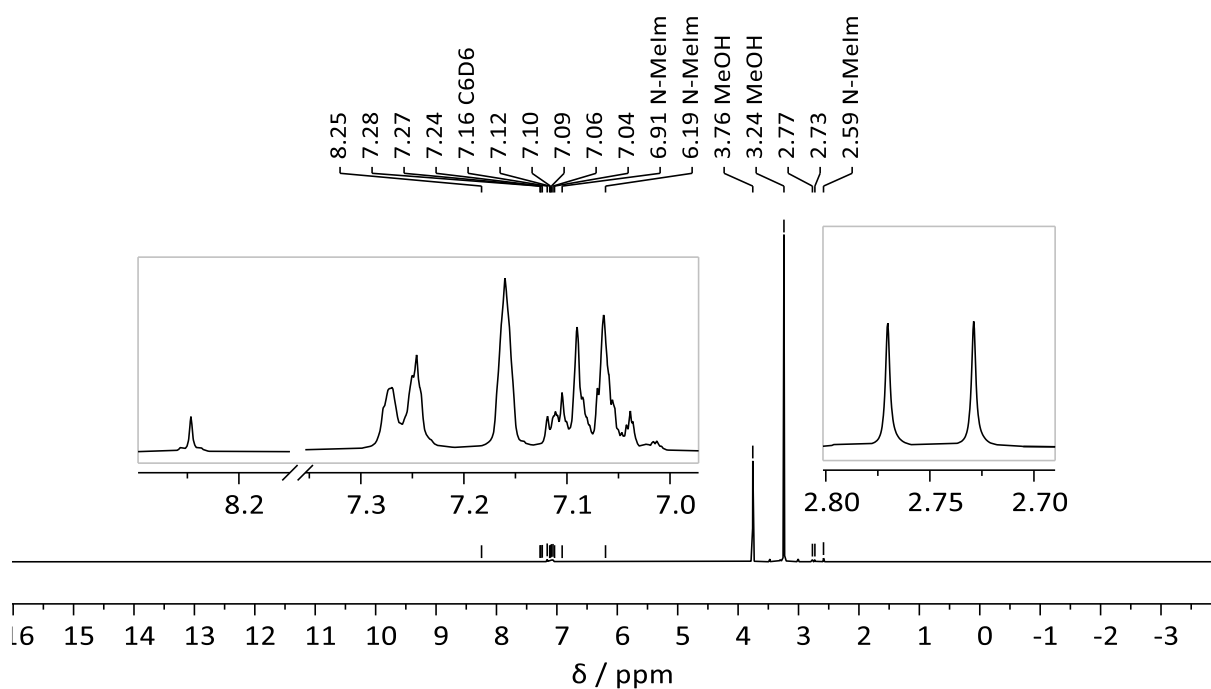

**Fig. S9**  $^1\text{H}$  NMR spectrum (300.13 MHz,  $\text{C}_6\text{D}_6$ , 298 K) of the reaction mixture of compound **1** with methanol to form compound **3a**.

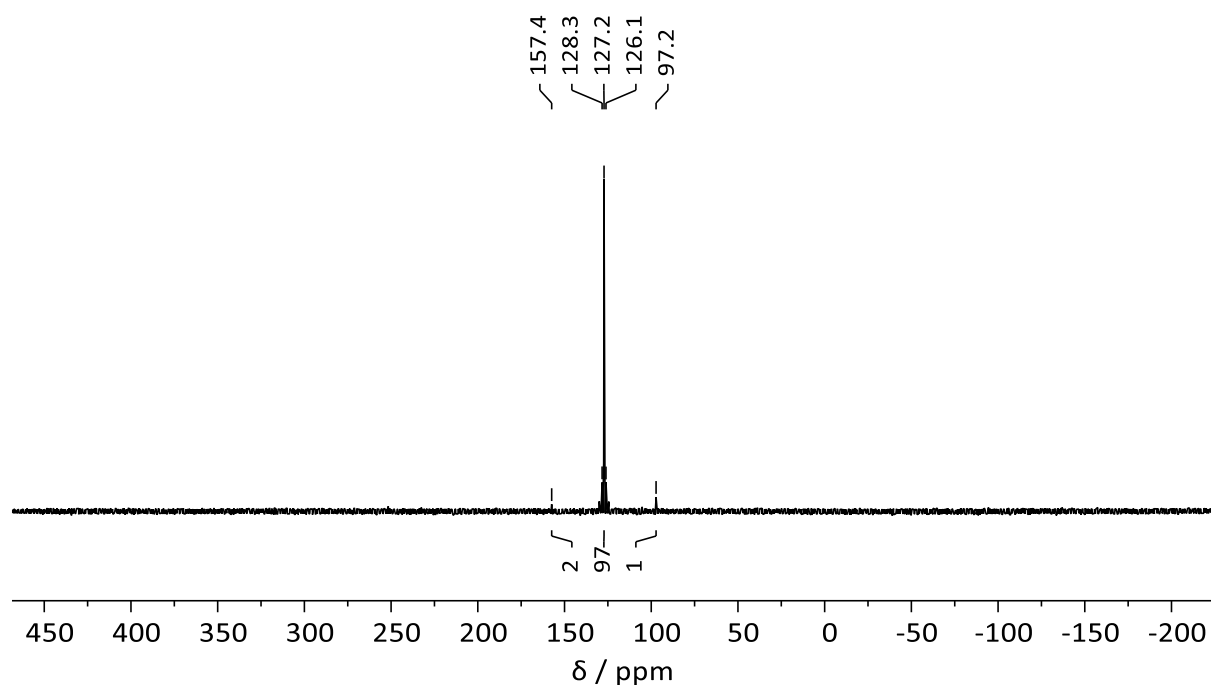

**Fig. S10**  $^{31}\text{P}\{^1\text{H}\}$  NMR spectrum (121.51 MHz,  $\text{C}_6\text{D}_6$ , 298 K) of the reaction mixture of compound **1** with methanol to form compound **3a**.

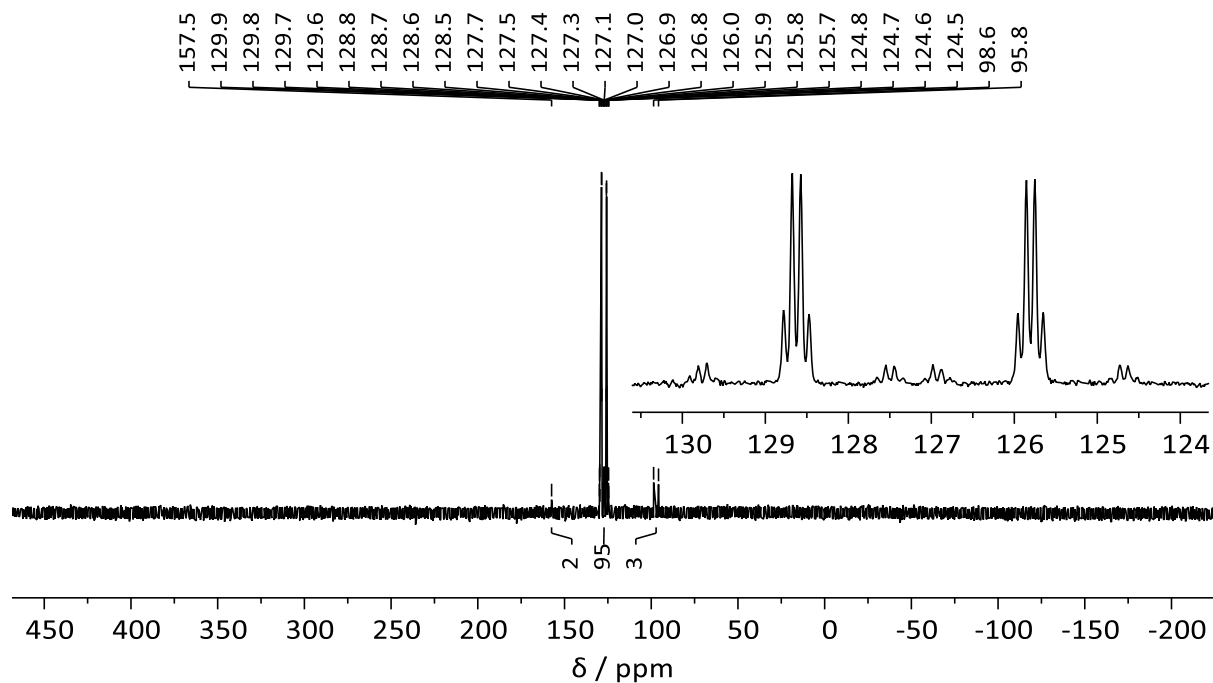

**Fig. S11**  $^{31}\text{P}$  NMR spectrum (121.51 MHz,  $\text{C}_6\text{D}_6$ , 298 K) of the reaction mixture of compound **1** with methanol to form compound **3a**.

### Compound 3b

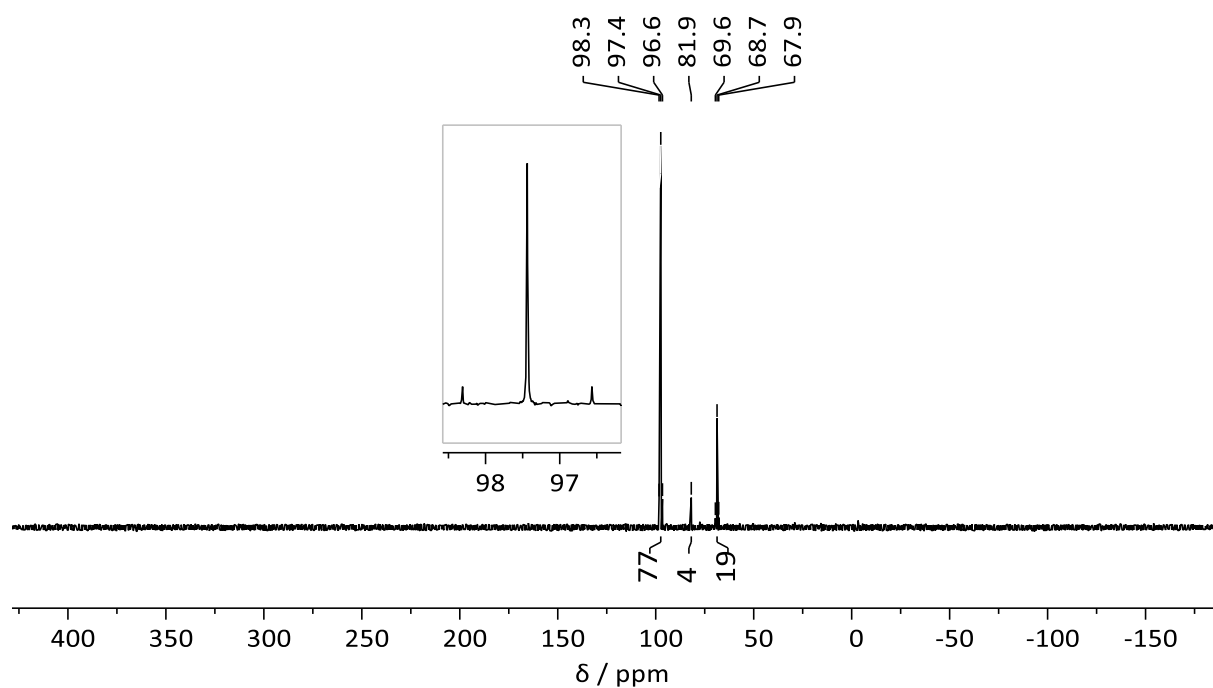

**Fig. S12**  $^{31}\text{P}\{^1\text{H}\}$  NMR spectrum (162.00 MHz,  $\text{C}_6\text{D}_6$ , 298 K) of the reaction mixture of compound **1** with *tert*-butanol to form compound **3b**.

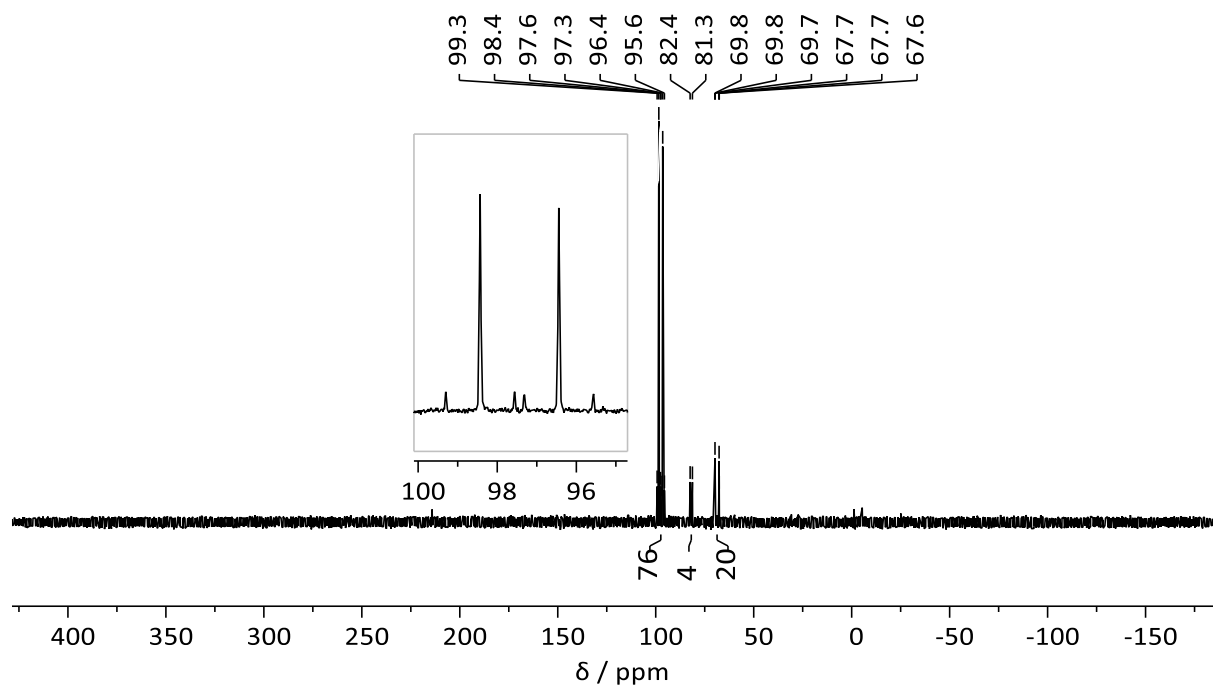

**Fig. S13**  $^{31}\text{P}$  NMR spectrum (162.00 MHz,  $\text{C}_6\text{D}_6$ , 298 K) of the reaction mixture of compound **1** with *tert*-butanol to form compound **3b**.

### Compound 10a

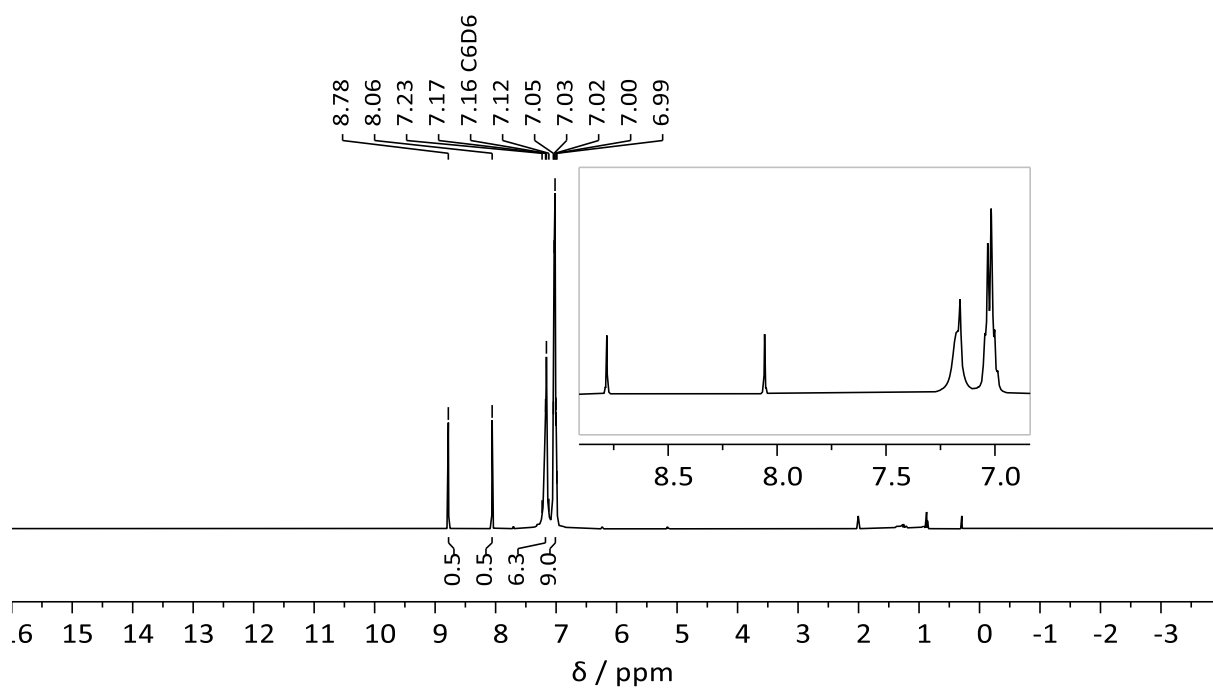

**Fig. S14**  $^1\text{H}$  NMR spectrum (500.04 MHz,  $\text{C}_6\text{D}_6$ , 298 K) of compound **10a**.

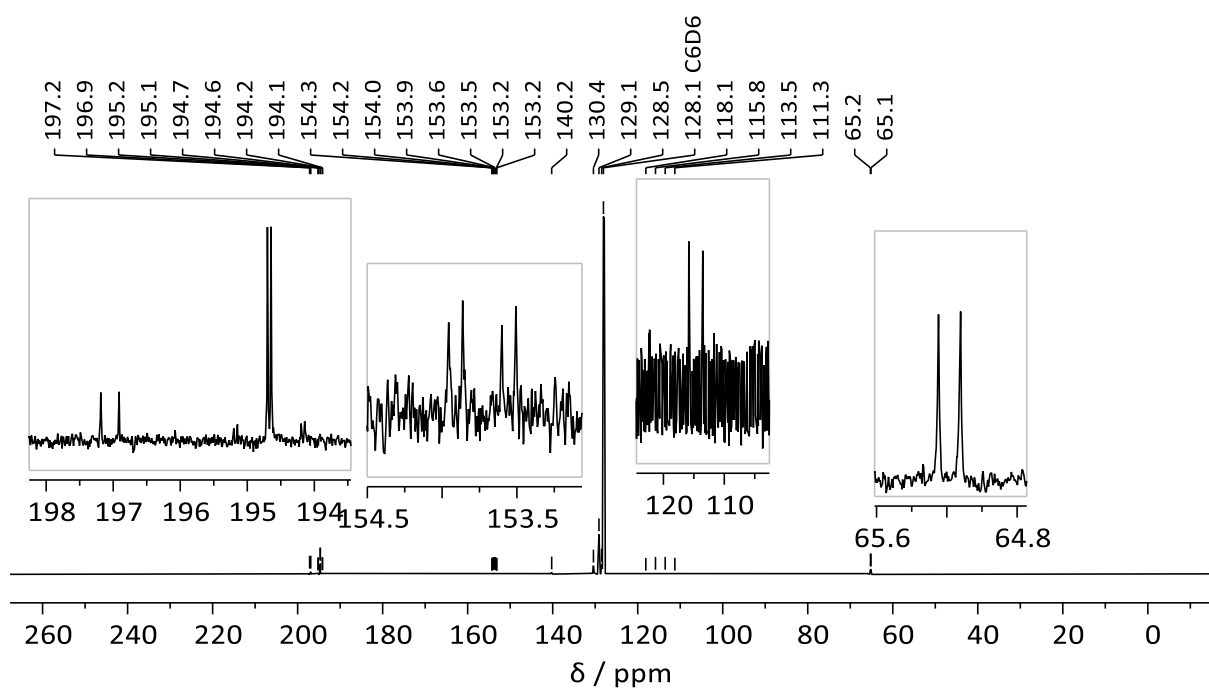

**Fig. S15**  $^{13}\text{C}\{^1\text{H}\}$  NMR spectrum (125.52 MHz,  $\text{C}_6\text{D}_6$ , 298 K) of compound **10a**.

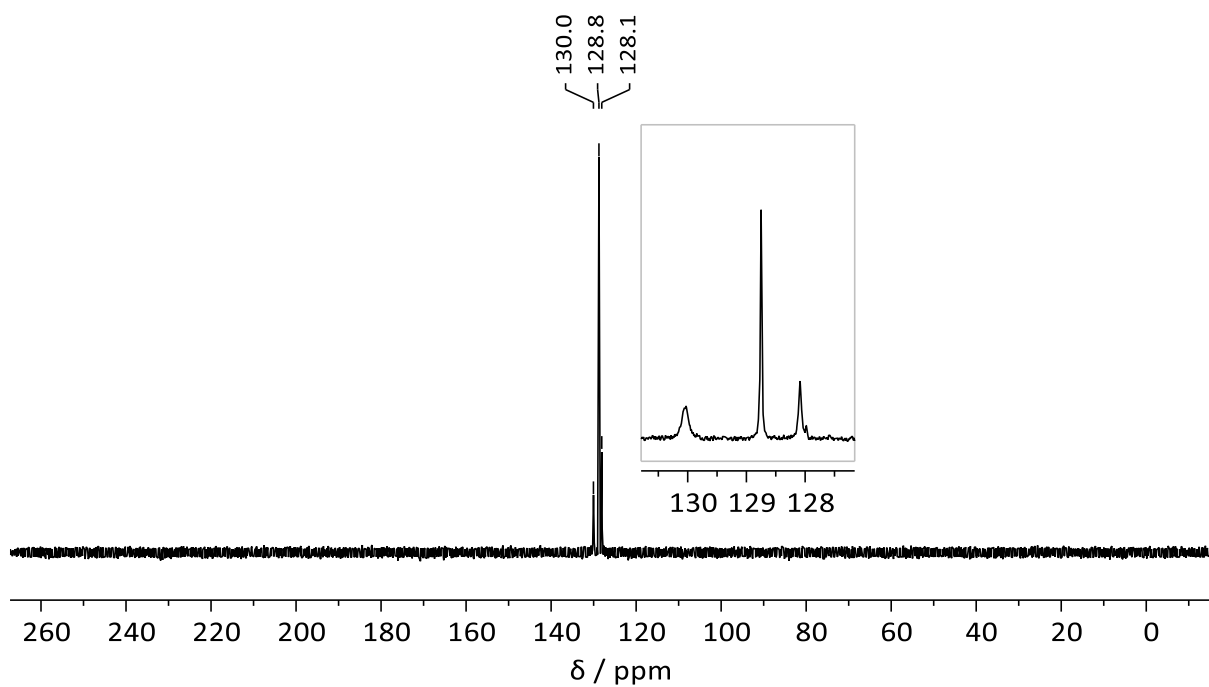

**Fig. S16**  $^{13}\text{C}\{^1\text{H}\}$  DEPT90 NMR spectrum (125.52 MHz,  $\text{C}_6\text{D}_6$ , 298 K) of compound **10a**.

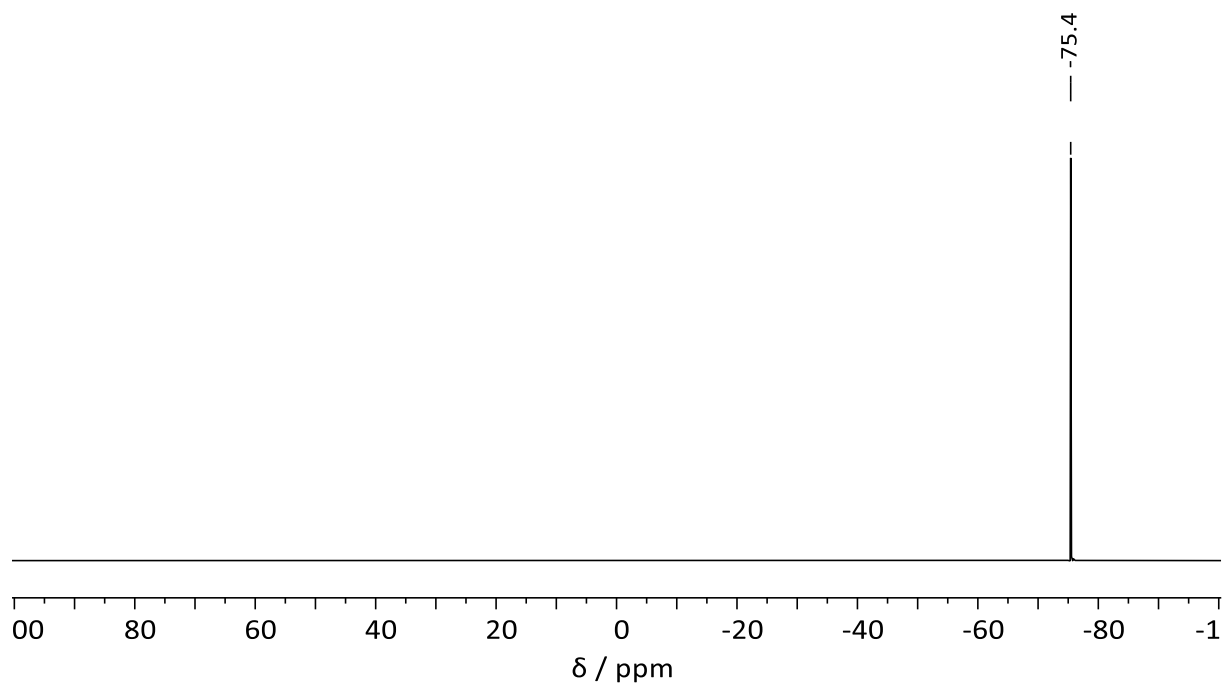

**Fig. S17**  $^{19}\text{F}\{^1\text{H}\}$  NMR spectrum (469.65 MHz,  $\text{C}_6\text{D}_6$ , 298 K) of compound **10a**.

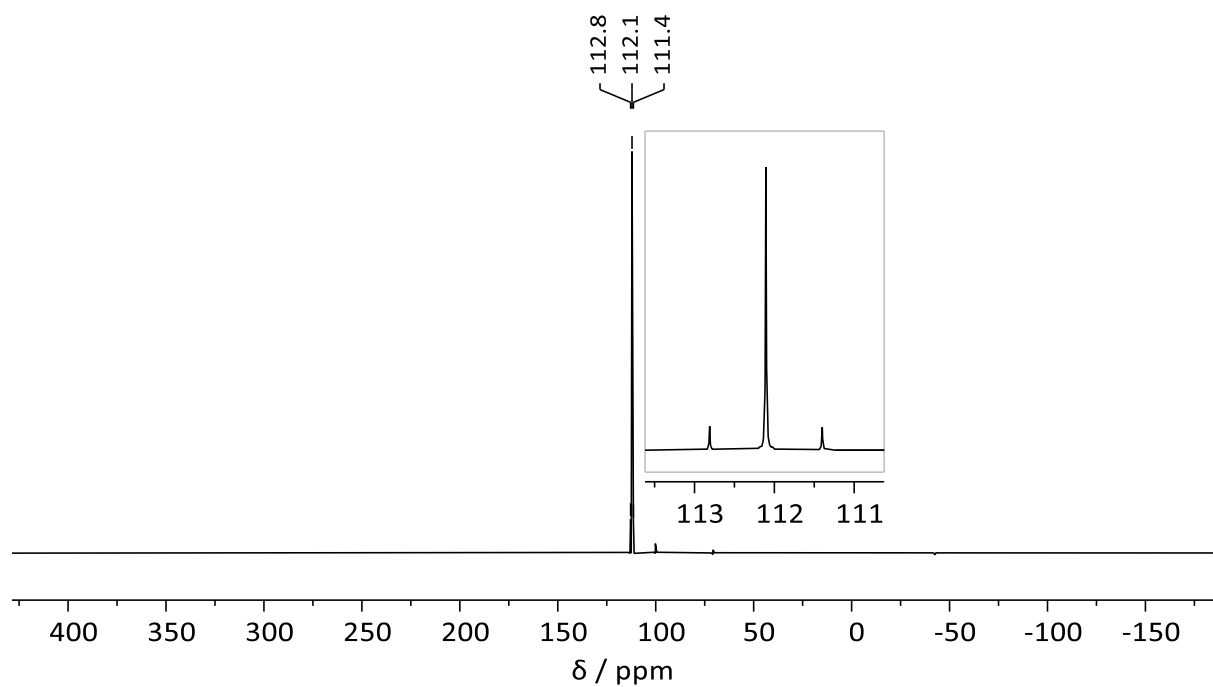

**Fig. S18**  $^{31}\text{P}\{^1\text{H}\}$  NMR spectrum (202.44 MHz,  $\text{C}_6\text{D}_6$ , 298 K) of compound **10a**.

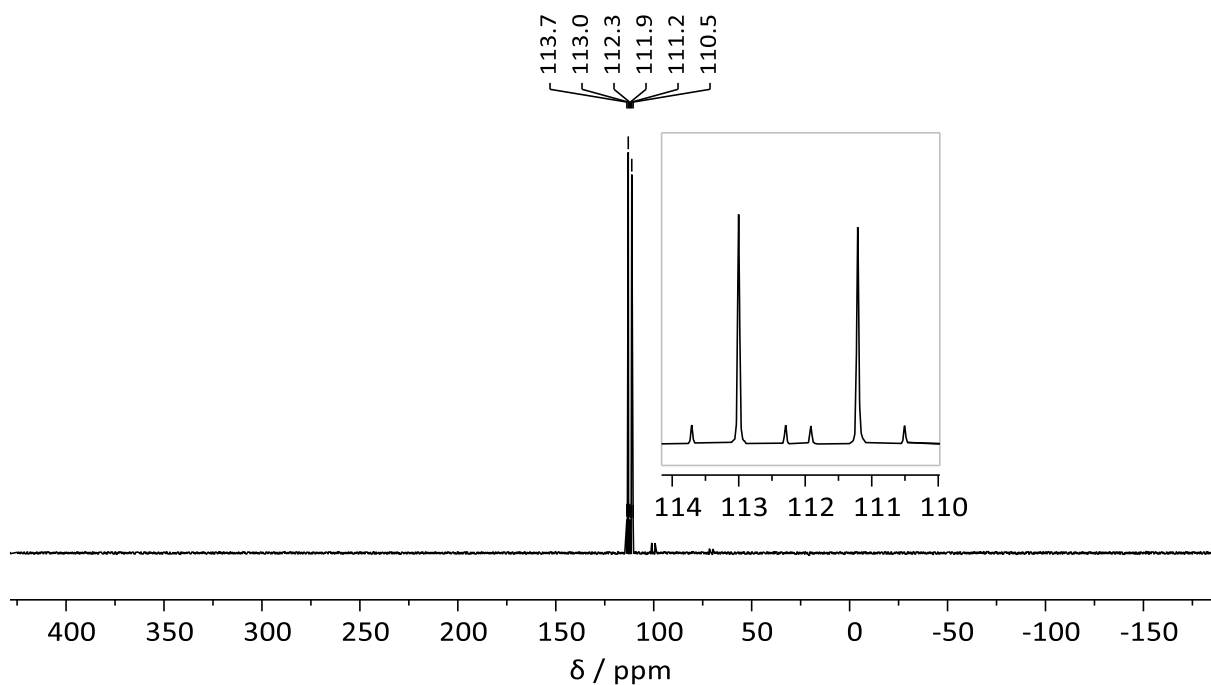

**Fig. S19**  $^{31}\text{P}$  NMR spectrum (202.44 MHz, C<sub>6</sub>D<sub>6</sub>, 298 K) of compound **10a**.

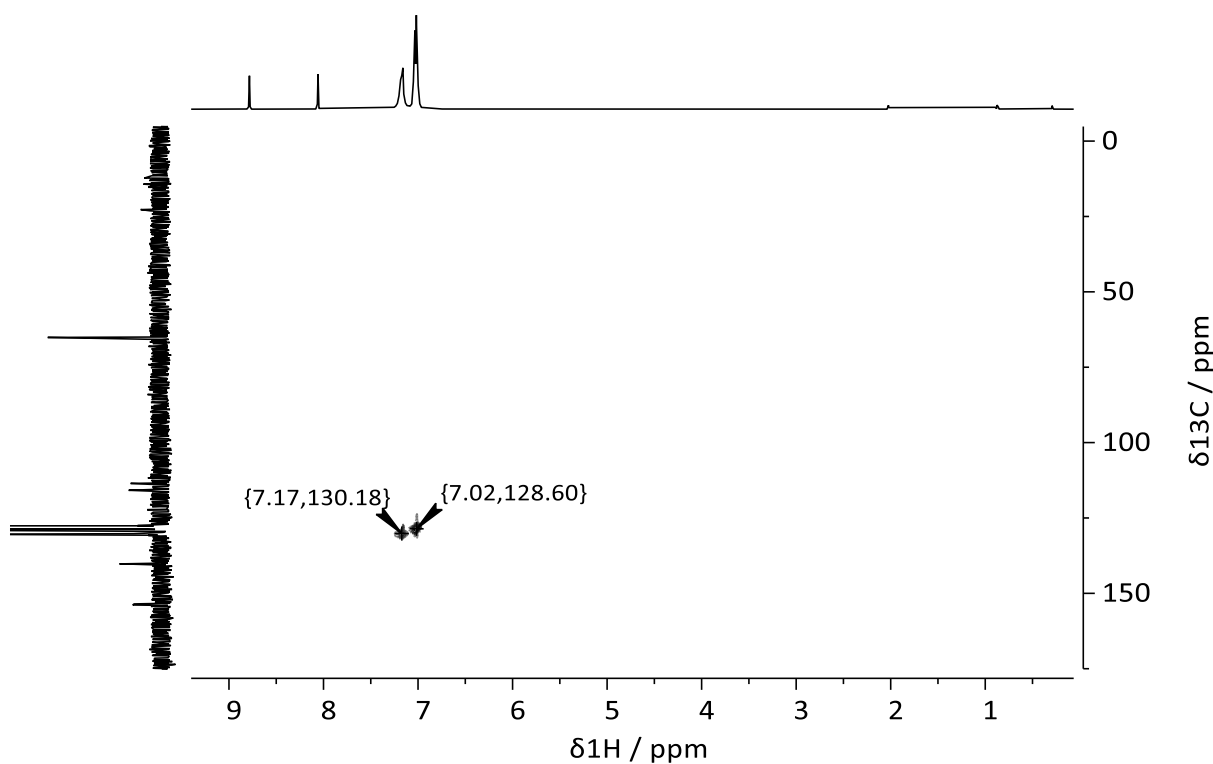

**Fig. S20**  $^1\text{H}$ ,  $^{13}\text{C}$  HSQC NMR spectrum (499.13 MHz, 125.52 MHz, C<sub>6</sub>D<sub>6</sub>, 298 K) of compound **10a**.



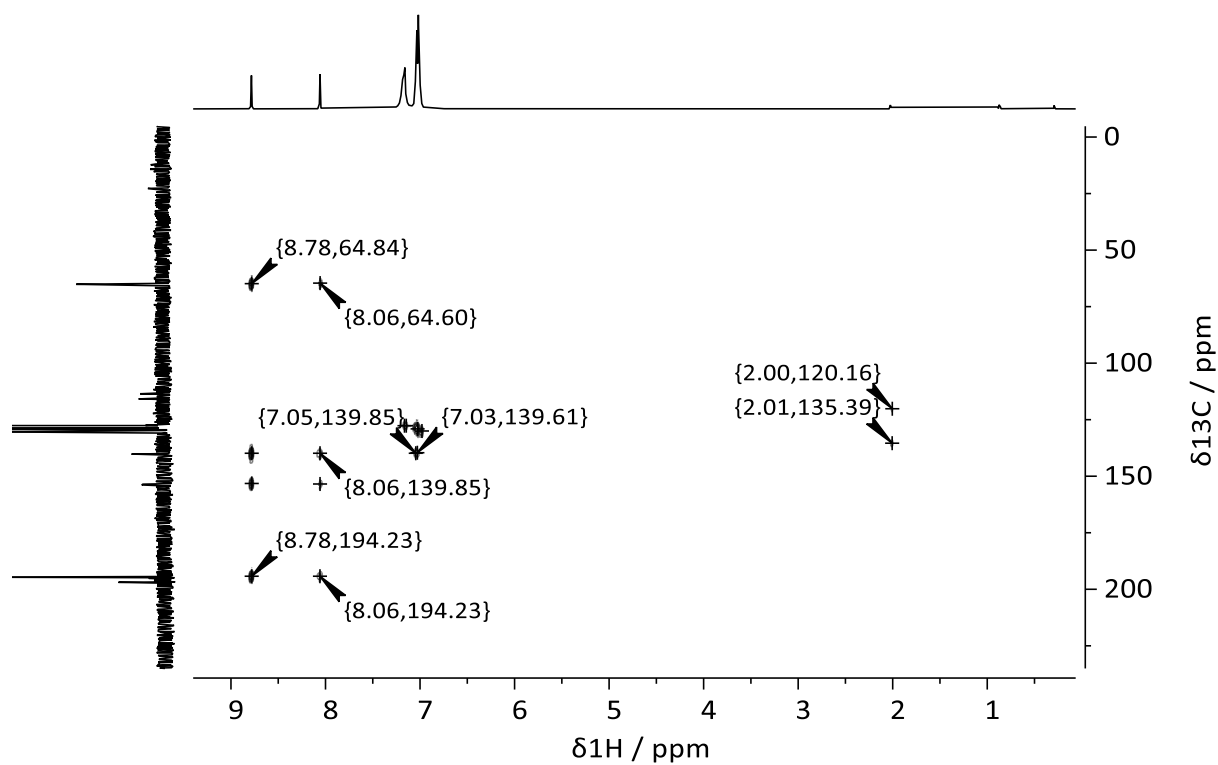

**Fig. S21**  $^1\text{H}$ ,  $^{13}\text{C}$  HMBC NMR spectrum (499.13 MHz, 125.52 MHz,  $\text{C}_6\text{D}_6$ , 298 K) of compound **10a**.

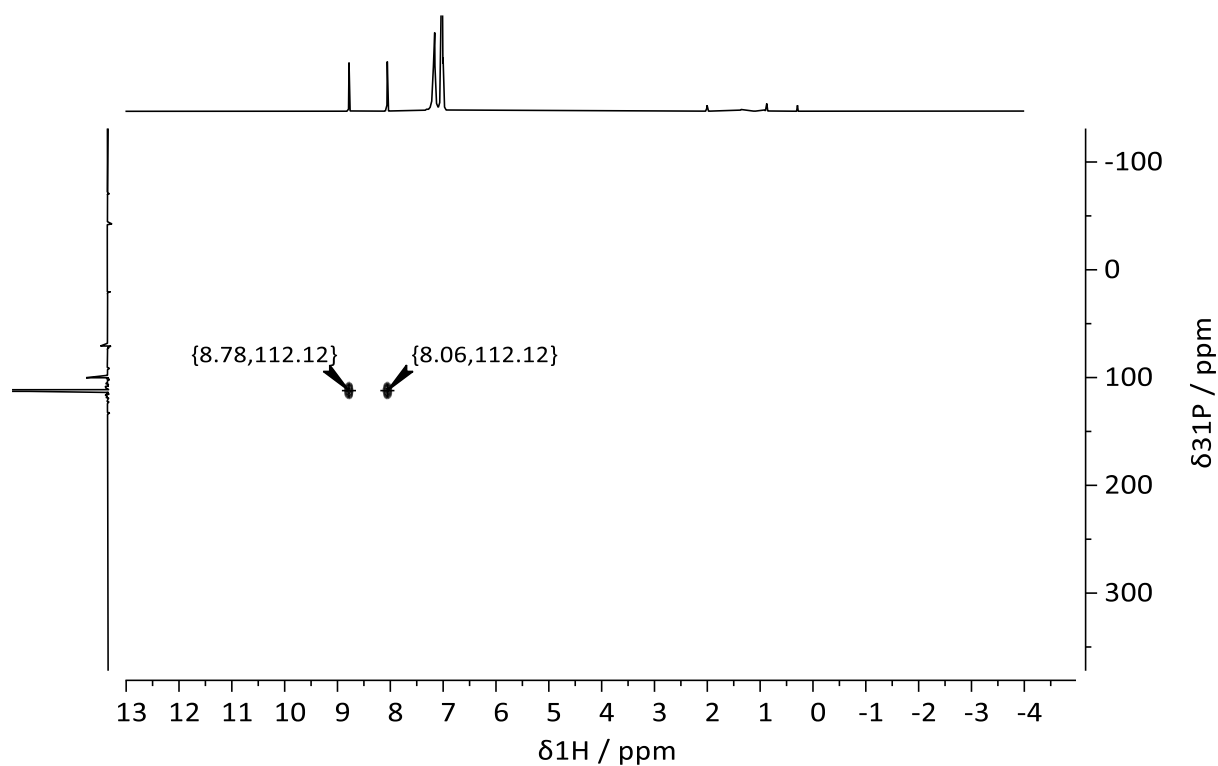

**Fig. S22**  $^1\text{H}$ ,  $^{31}\text{P}$  HMBC NMR spectrum (500.04 MHz, 202.44 MHz,  $\text{C}_6\text{D}_6$ , 298 K) of compound **10a**.

Compound 10a-Cr

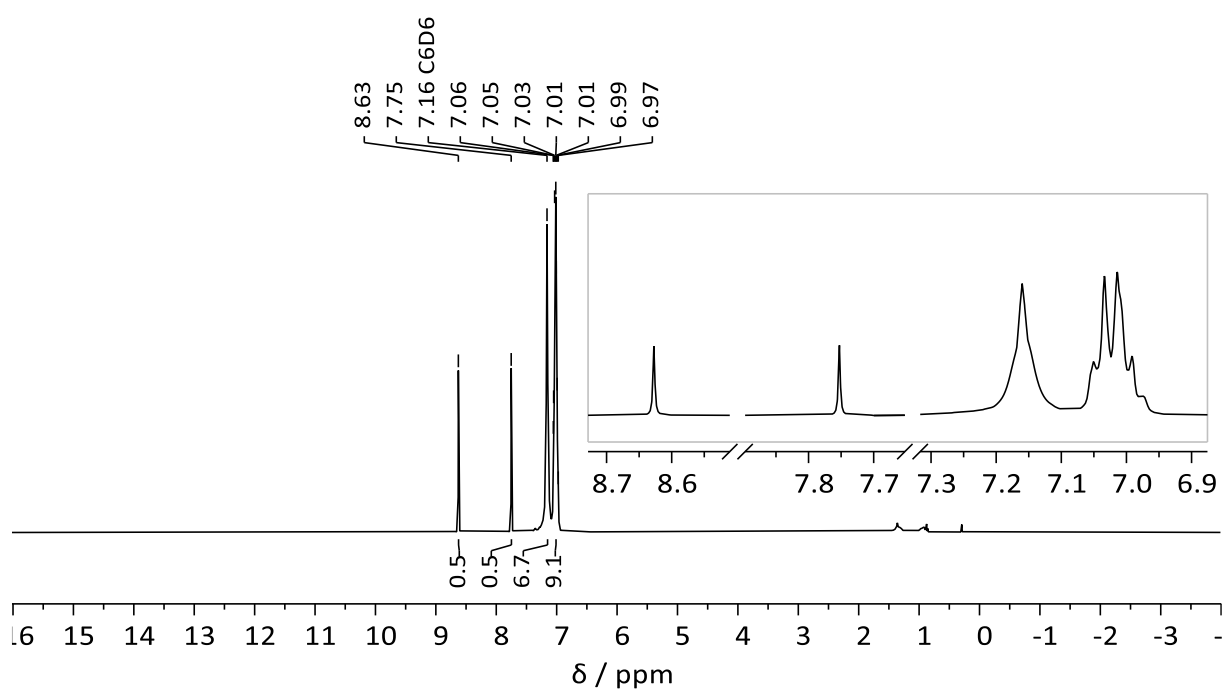

Fig. S23  $^1\text{H}$  NMR spectrum (400.13 MHz,  $\text{C}_6\text{D}_6$ , 298 K) of compound 10a-Cr.

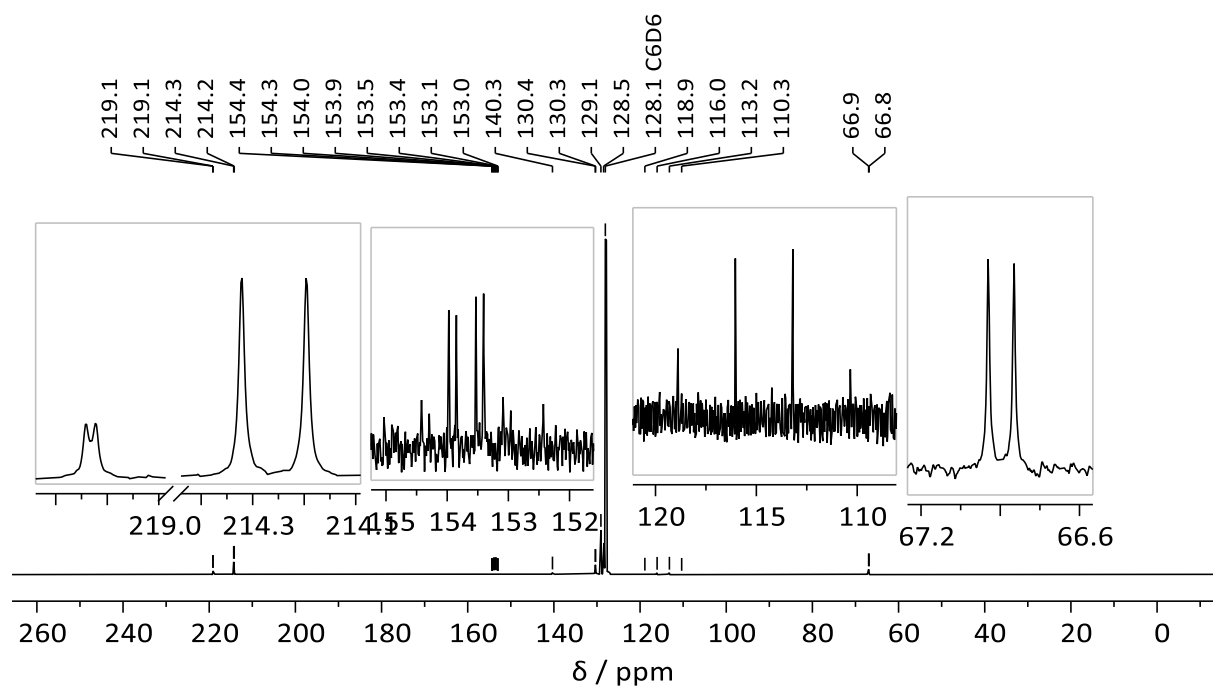

Fig. S24  $^{13}\text{C}\{^1\text{H}\}$  NMR spectrum (100.63 MHz,  $\text{C}_6\text{D}_6$ , 298 K) of compound 10a-Cr.

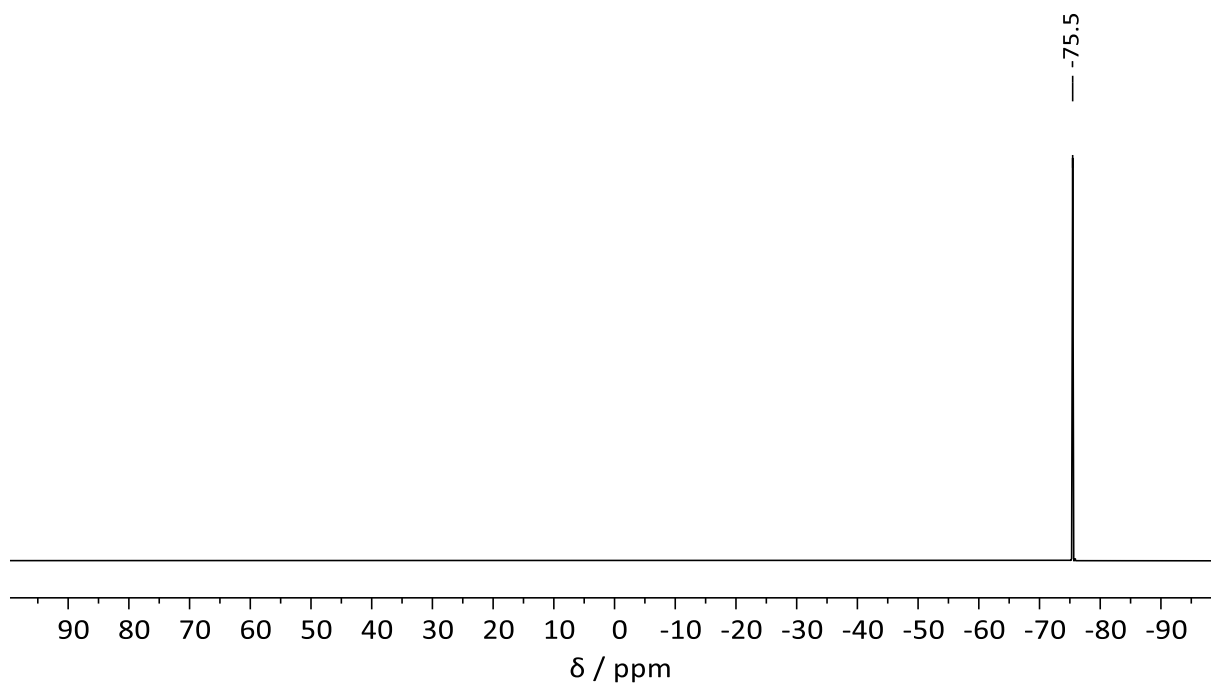

**Fig. S25**  $^{19}\text{F}$  NMR spectrum (470.51 MHz,  $\text{C}_6\text{D}_6$ , 298 K) of compound **10a-Cr**.

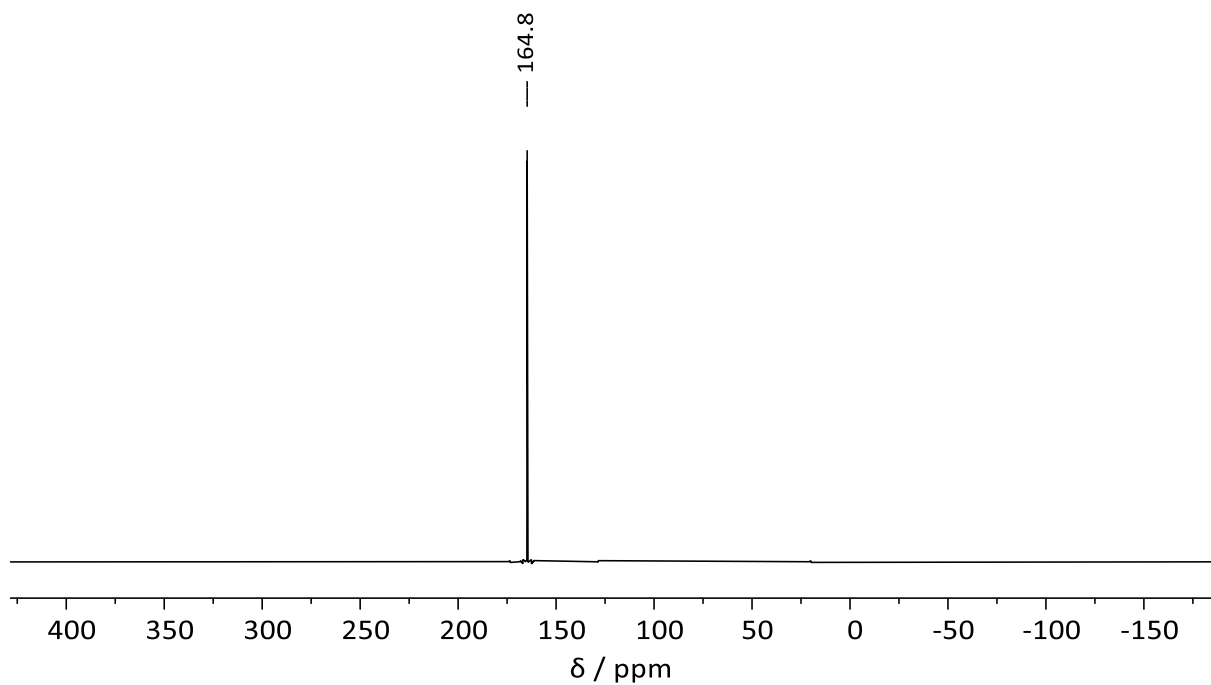

**Fig. S26**  $^{31}\text{P}\{^1\text{H}\}$  NMR spectrum (162.00 MHz,  $\text{C}_6\text{D}_6$ , 298 K) of compound **10a-Cr**.

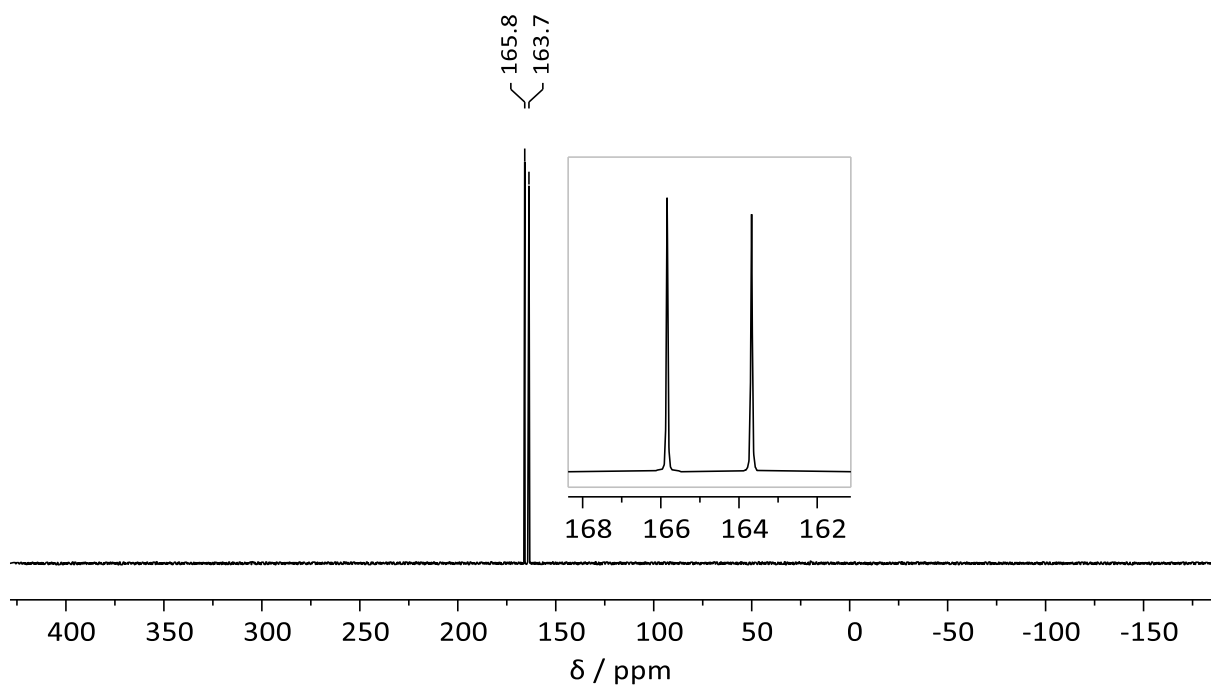

**Fig. S27** <sup>31</sup>P NMR spectrum (162.00 MHz, C<sub>6</sub>D<sub>6</sub>, 298 K) of compound **10a-Cr**.

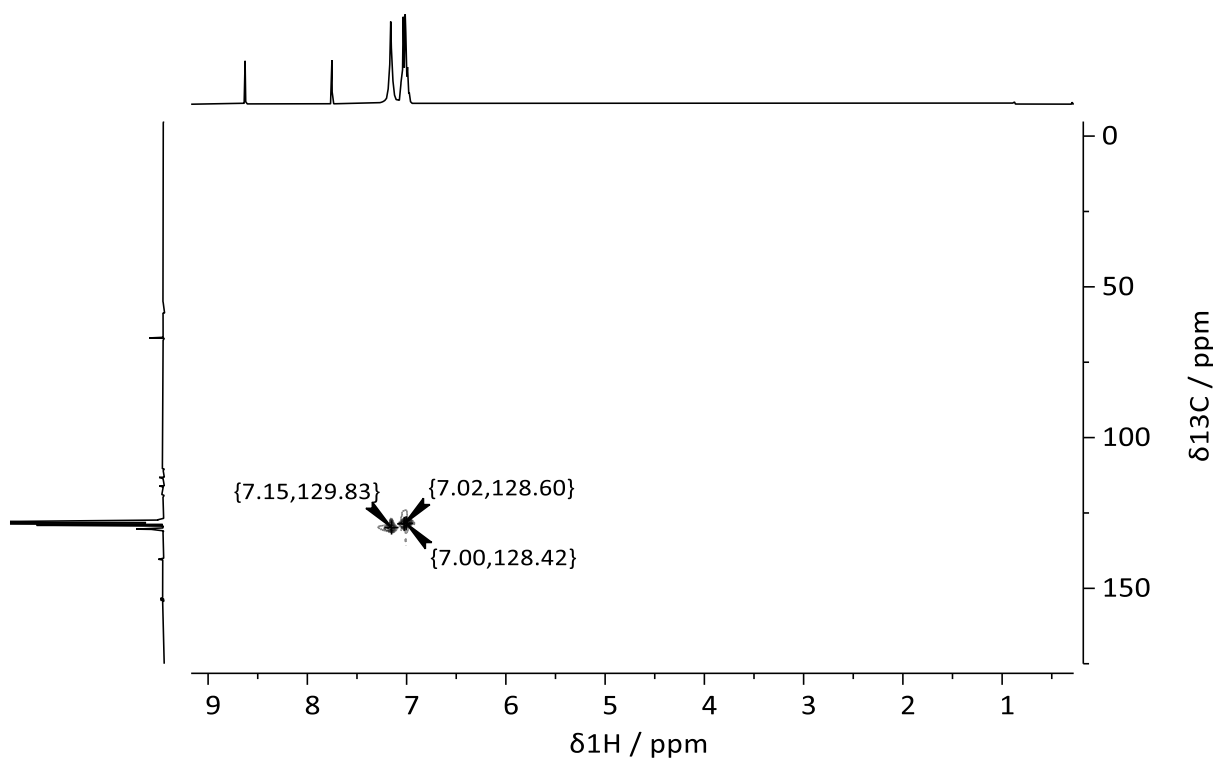

**Fig. S28** <sup>1</sup>H, <sup>13</sup>C HSQC NMR spectrum (400.13 MHz, 100.62 MHz, C<sub>6</sub>D<sub>6</sub>, 298 K) of compound **10a-Cr**.

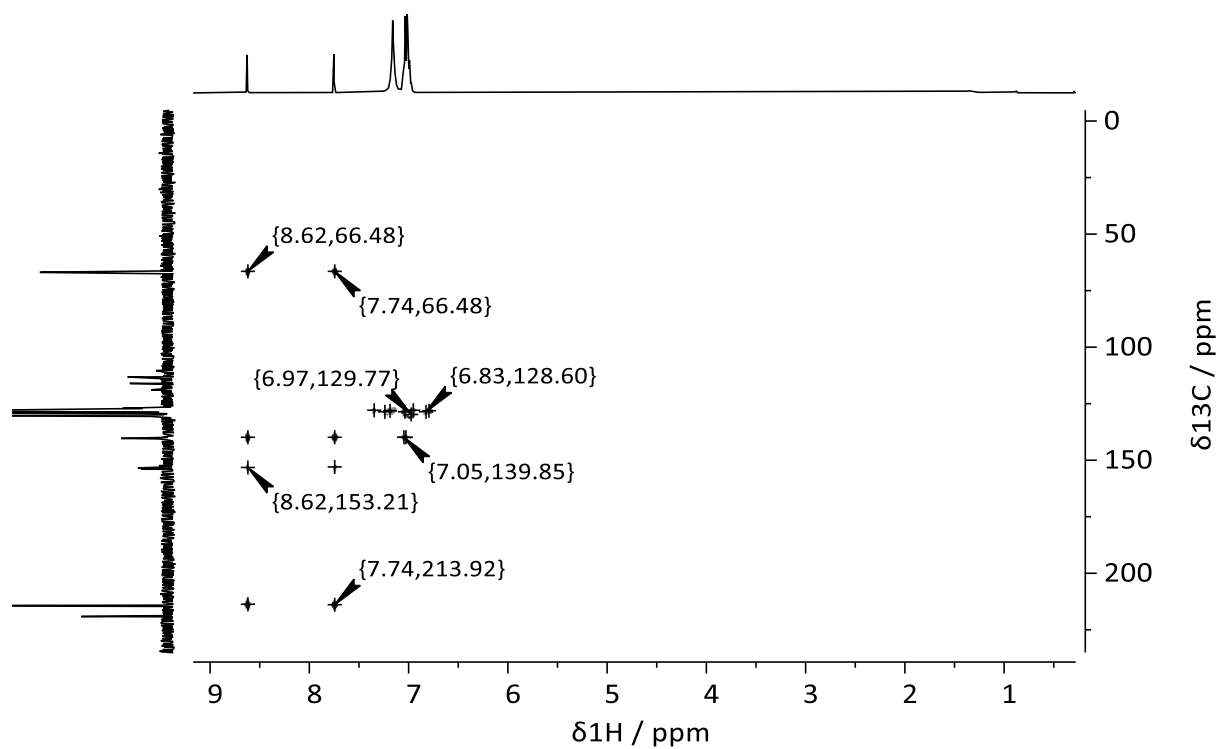

**Fig. S29**  $^1\text{H}$ ,  $^{13}\text{C}$  HMBC NMR spectrum (400.13 MHz, 100.62 MHz,  $\text{C}_6\text{D}_6$ , 298 K) of compound **10a-Cr**.

### Compound 10b

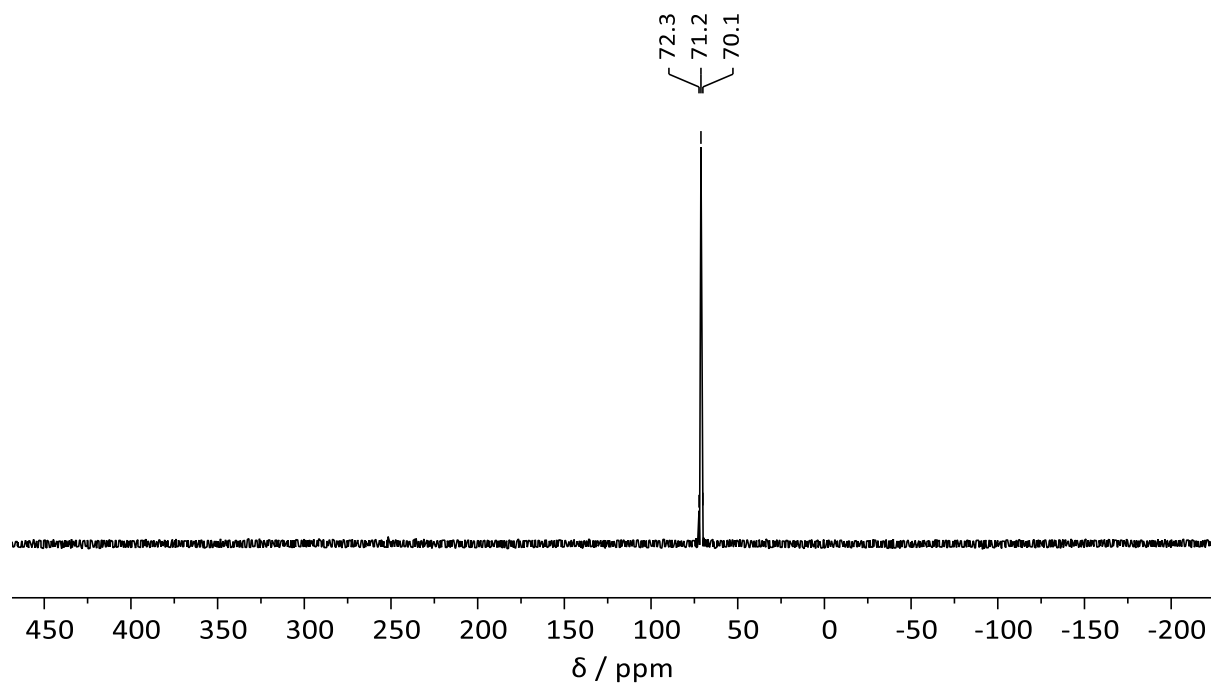

**Fig. S30**  $^{31}\text{P}\{^1\text{H}\}$  NMR spectrum (121.51 MHz,  $\text{CH}_2\text{Cl}_2$ , 298 K) of compound **10b**.

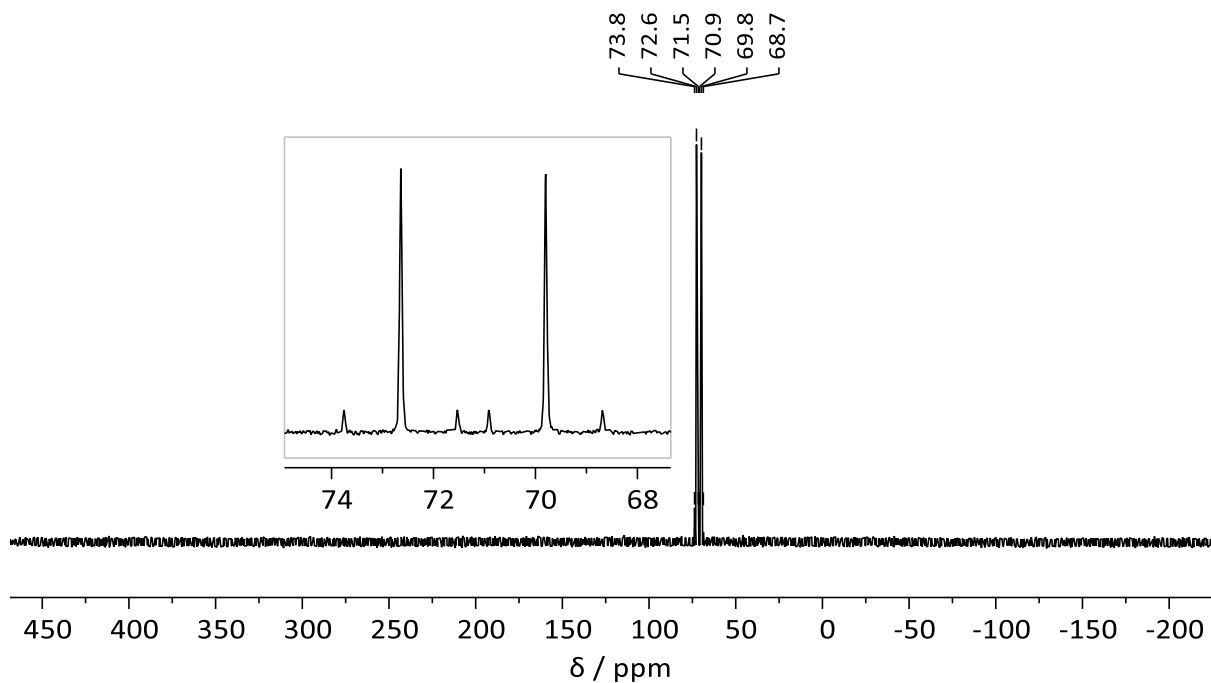

**Fig. S31** <sup>31</sup>P NMR spectrum (121.51 MHz, CH<sub>2</sub>Cl<sub>2</sub>, 298 K) of compound **10b**.

### Compound 11a

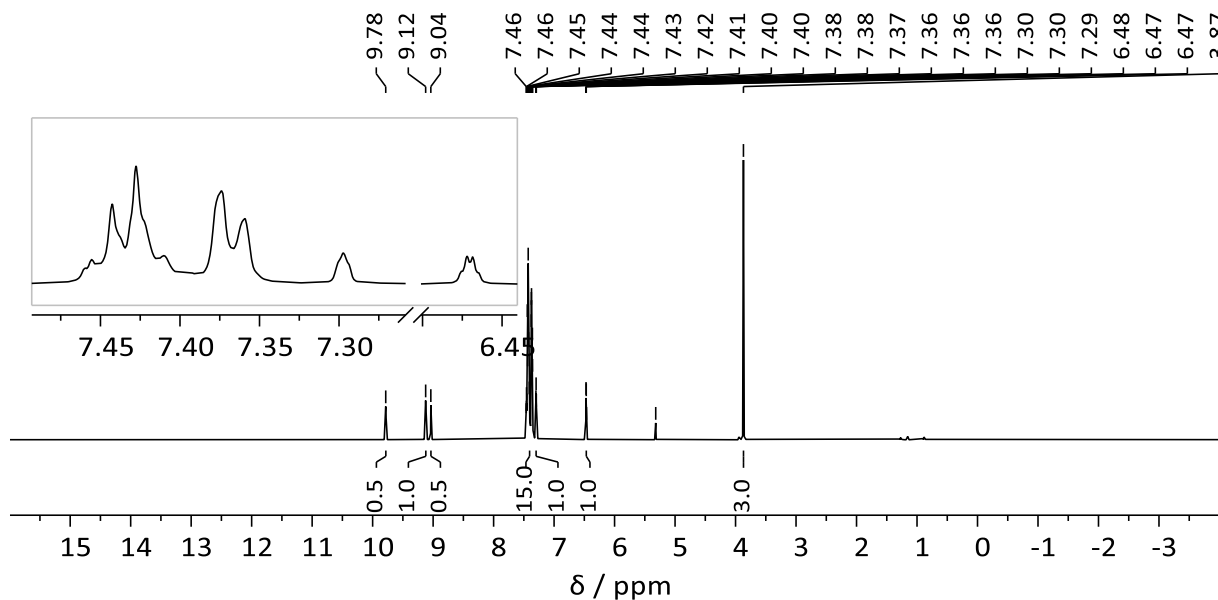

**Fig. S32** <sup>1</sup>H NMR spectrum (500.04 MHz, CD<sub>2</sub>Cl<sub>2</sub>, 298 K) of compound **11a**.

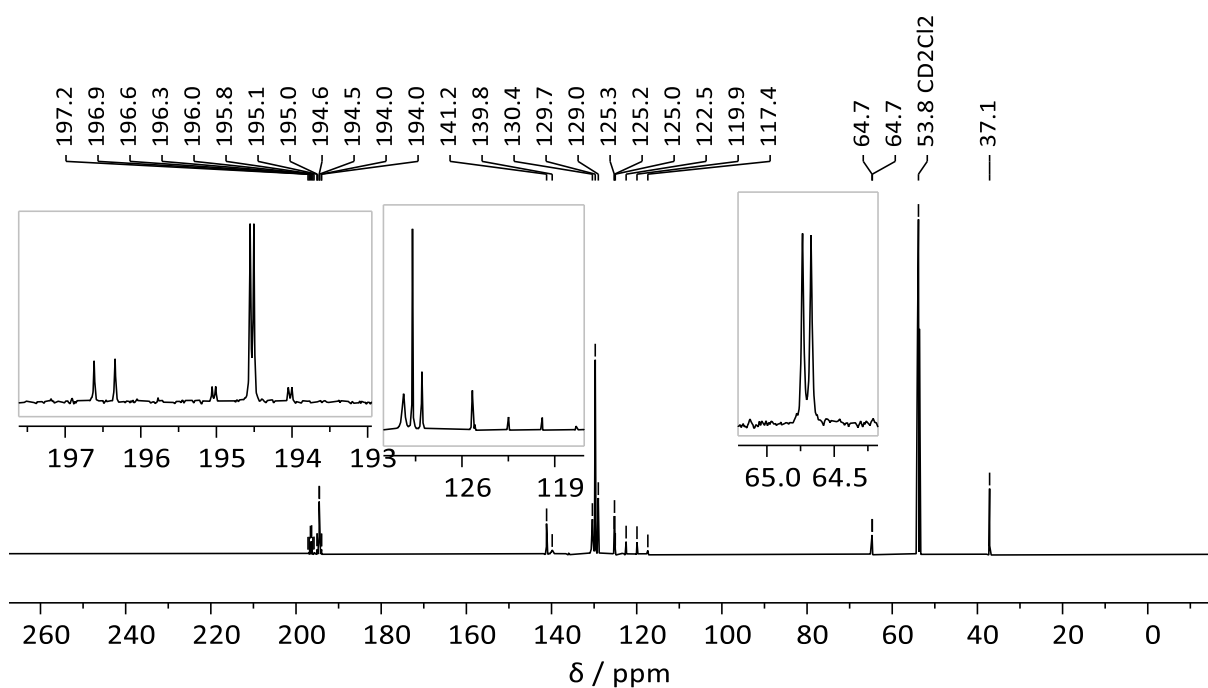

**Fig. S33**  $^{13}\text{C}\{^1\text{H}\}$  NMR spectrum (125.75 MHz,  $\text{CD}_2\text{Cl}_2$ , 298 K) of compound **11a**.

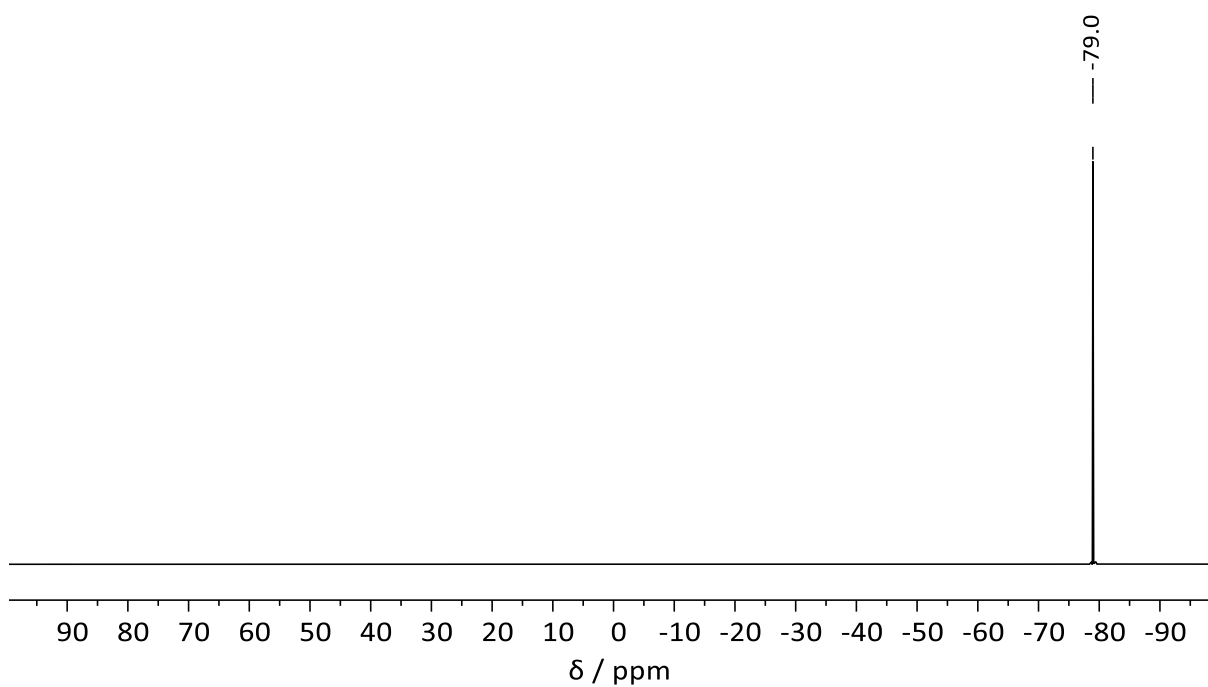

**Fig. S34**  $^{19}\text{F}$  NMR spectrum (470.51 MHz,  $\text{CD}_2\text{Cl}_2$ , 298 K) of compound **11a**.

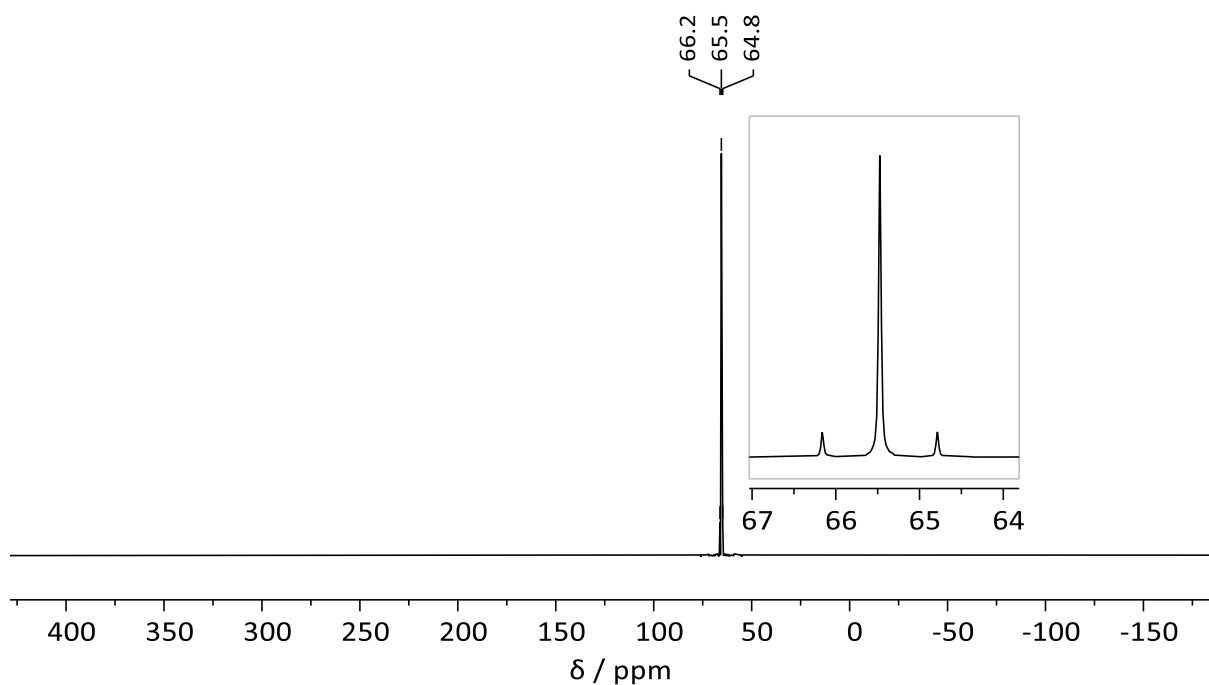

**Fig. S35**  $^{31}\text{P}\{^1\text{H}\}$  NMR spectrum (202.44 MHz,  $\text{CD}_2\text{Cl}_2$ , 298 K) of compound **11a**.

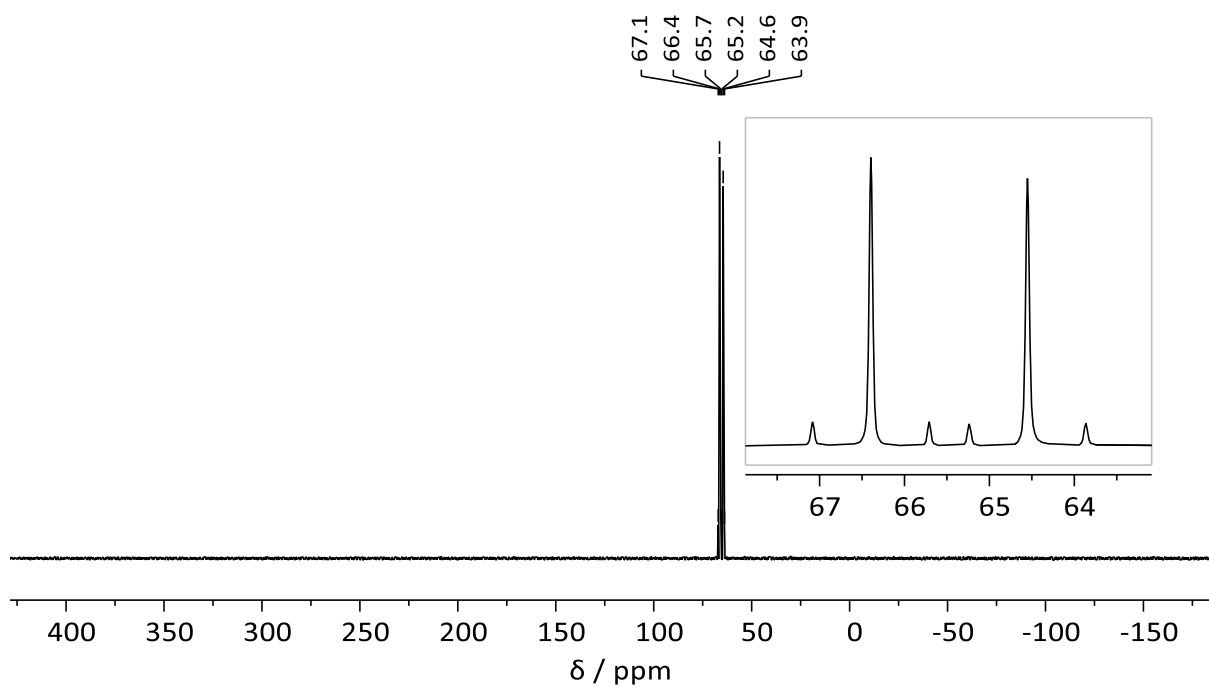

**Fig. S36**  $^{31}\text{P}$  NMR spectrum (202.44 MHz,  $\text{CD}_2\text{Cl}_2$ , 298 K) of compound **11a**.



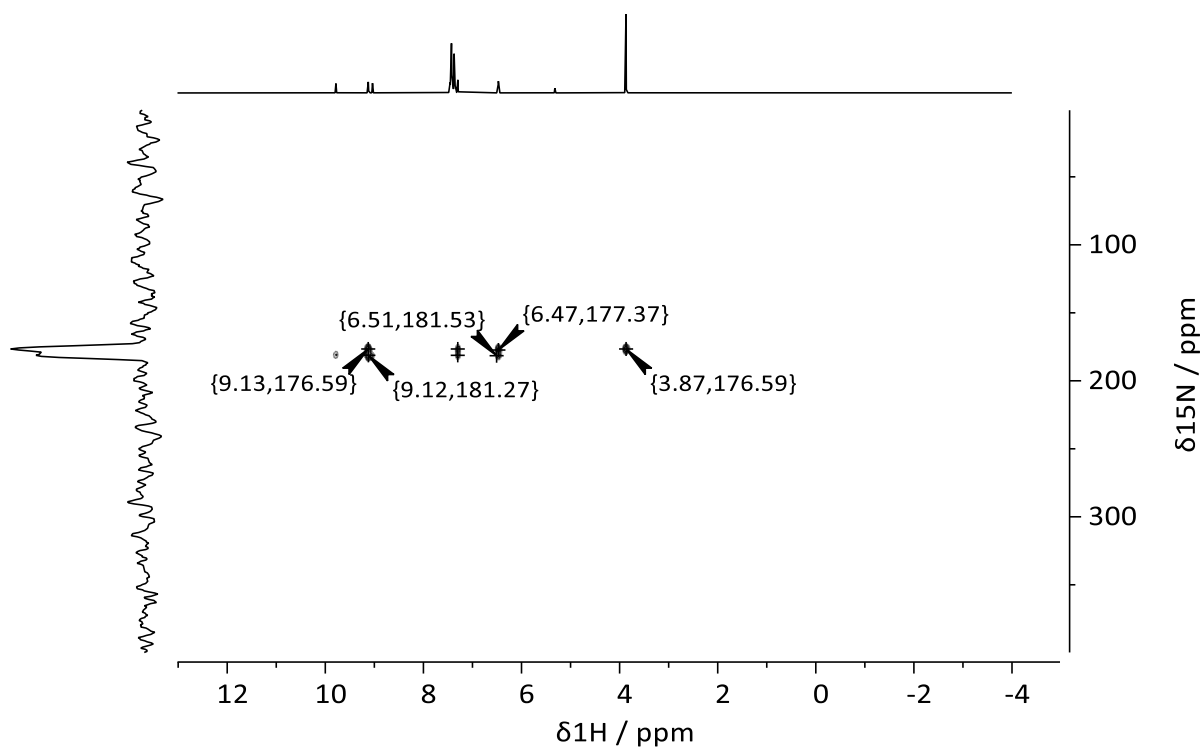

**Fig. S37**  $^1\text{H}$ ,  $^{15}\text{N}$  HMBC NMR spectrum (500.04 MHz, 50.68 MHz,  $\text{CD}_2\text{Cl}_2$ , 298 K) of compound **11a**.

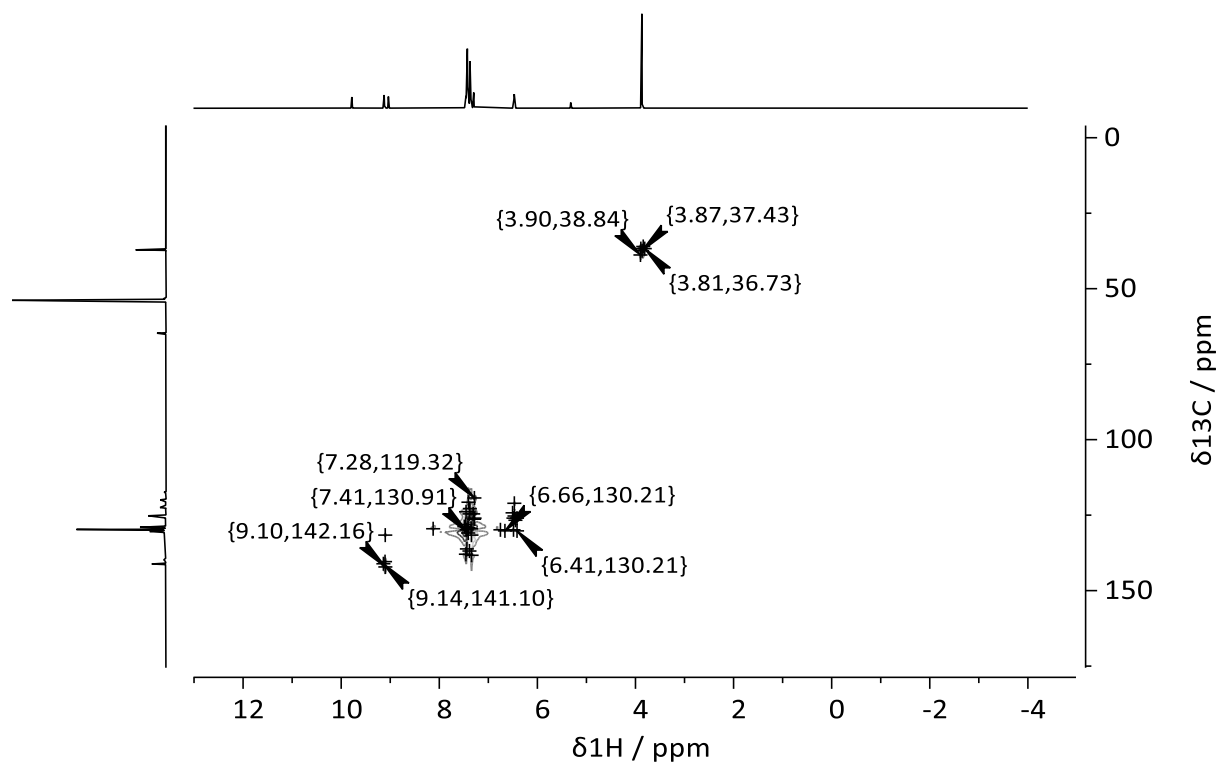

**Fig. S38**  $^1\text{H}$ ,  $^{13}\text{C}$  HSQC NMR spectrum (500.04 MHz, 125.75 MHz,  $\text{CD}_2\text{Cl}_2$ , 298 K) of compound **11a**.

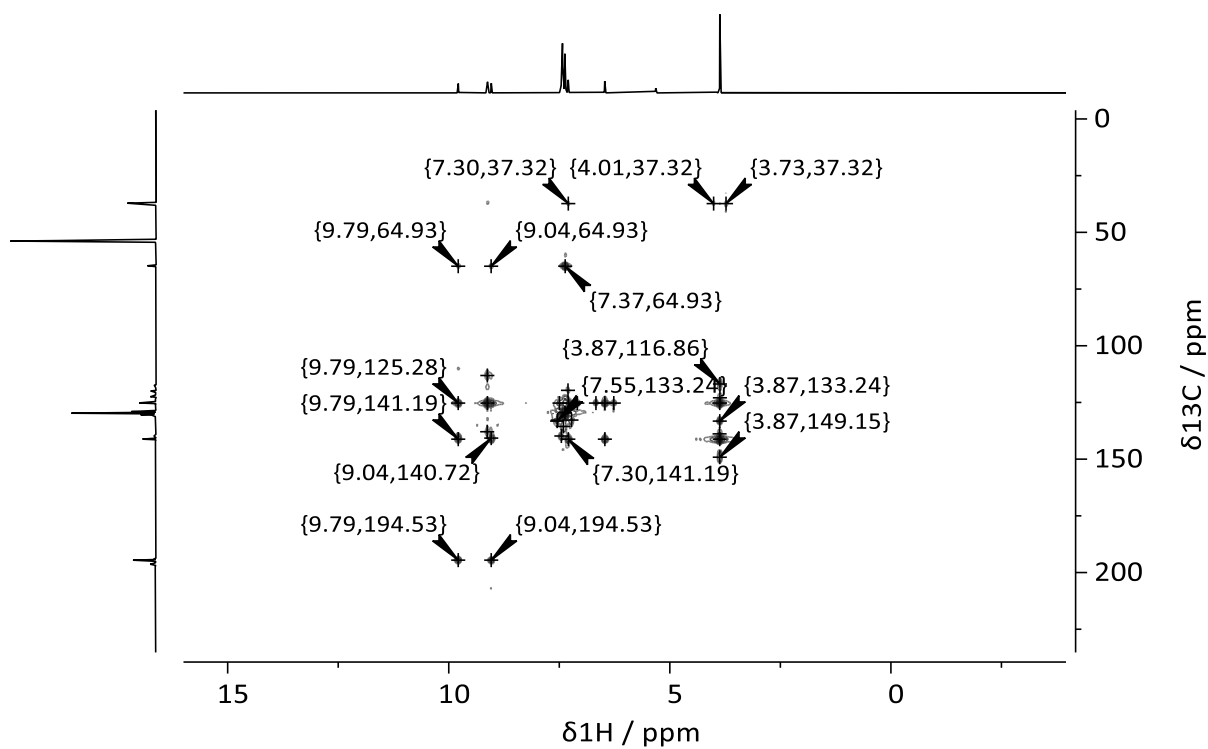

**Fig. S39**  $^1\text{H}$ ,  $^{13}\text{C}$  HMBC NMR spectrum (500.04 MHz, 125.75 MHz,  $\text{CD}_2\text{Cl}_2$ , 298 K) of compound **11a**.

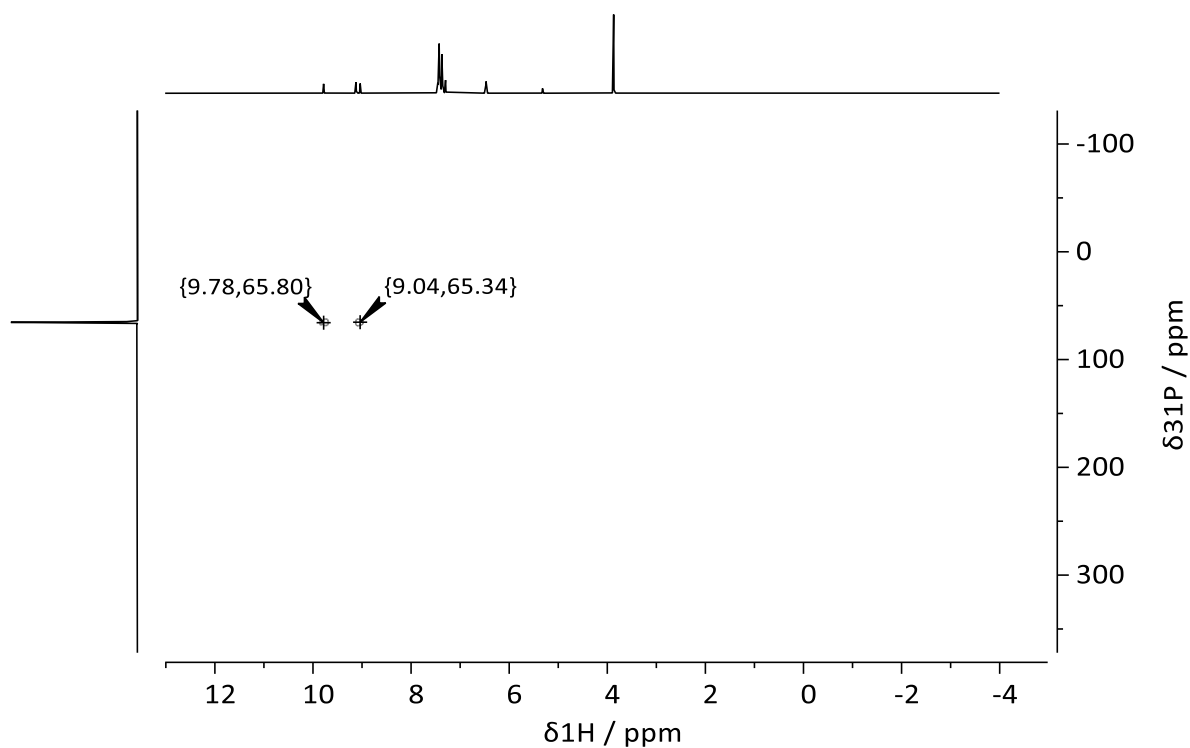

**Fig. S40**  $^1\text{H}$ ,  $^{31}\text{P}$  HMQC NMR spectrum (500.04 MHz, 202.44 MHz,  $\text{CD}_2\text{Cl}_2$ , 298 K) of compound **11a**.

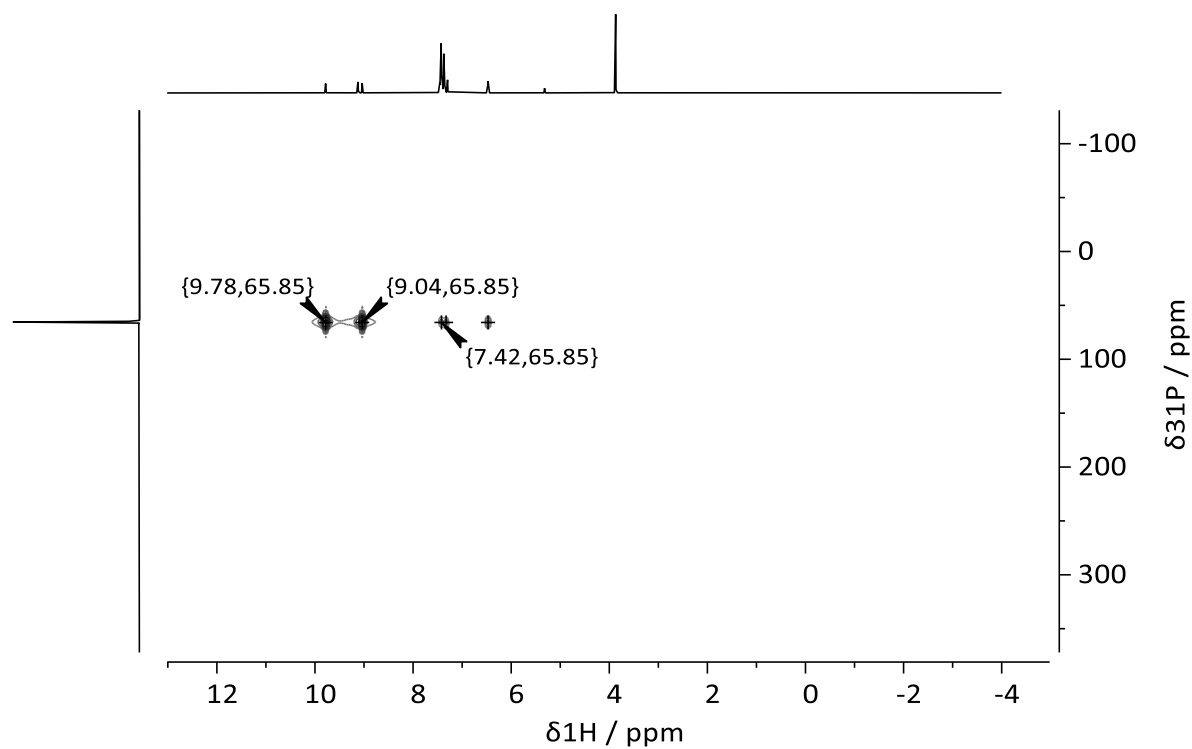

**Fig. S41**  $^1\text{H}$ ,  $^{31}\text{P}$  HMBC NMR spectrum (500.04 MHz, 202.44 MHz,  $\text{CD}_2\text{Cl}_2$ , 298 K) of compound **11a**.

**Compound 11a-Cr**

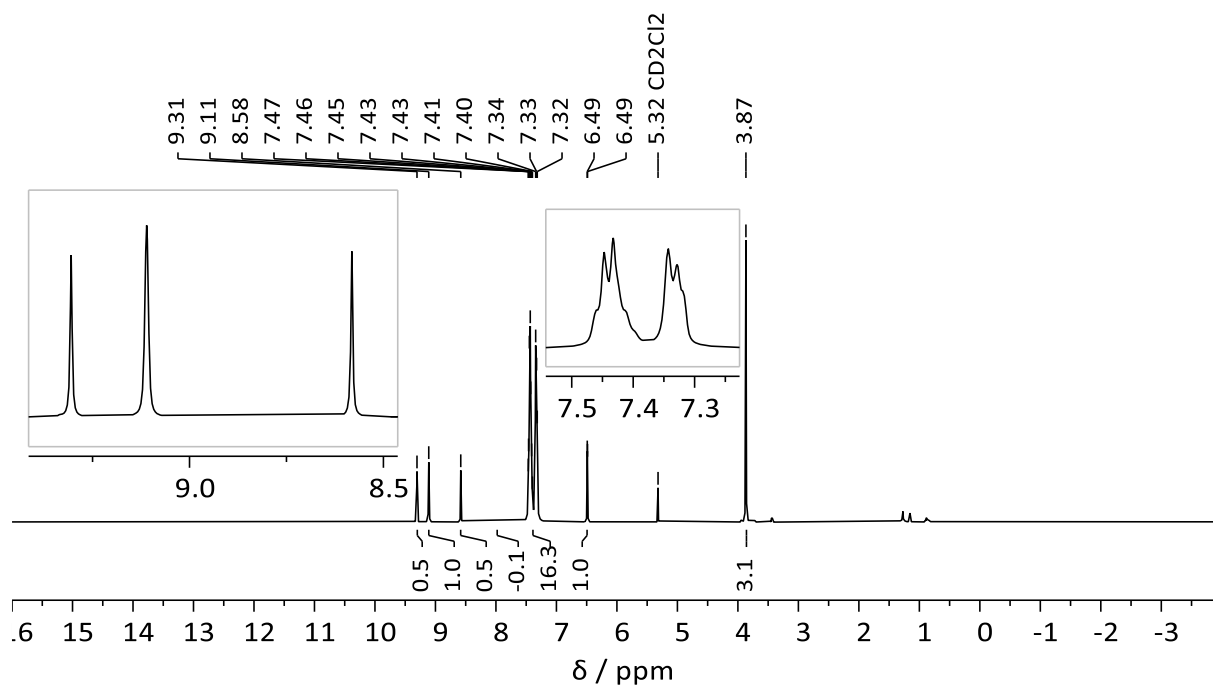

**Fig. S42**  $^1\text{H}$  NMR spectrum (500.04 MHz,  $\text{CD}_2\text{Cl}_2$ , 298 K) of compound **11a-Cr**.

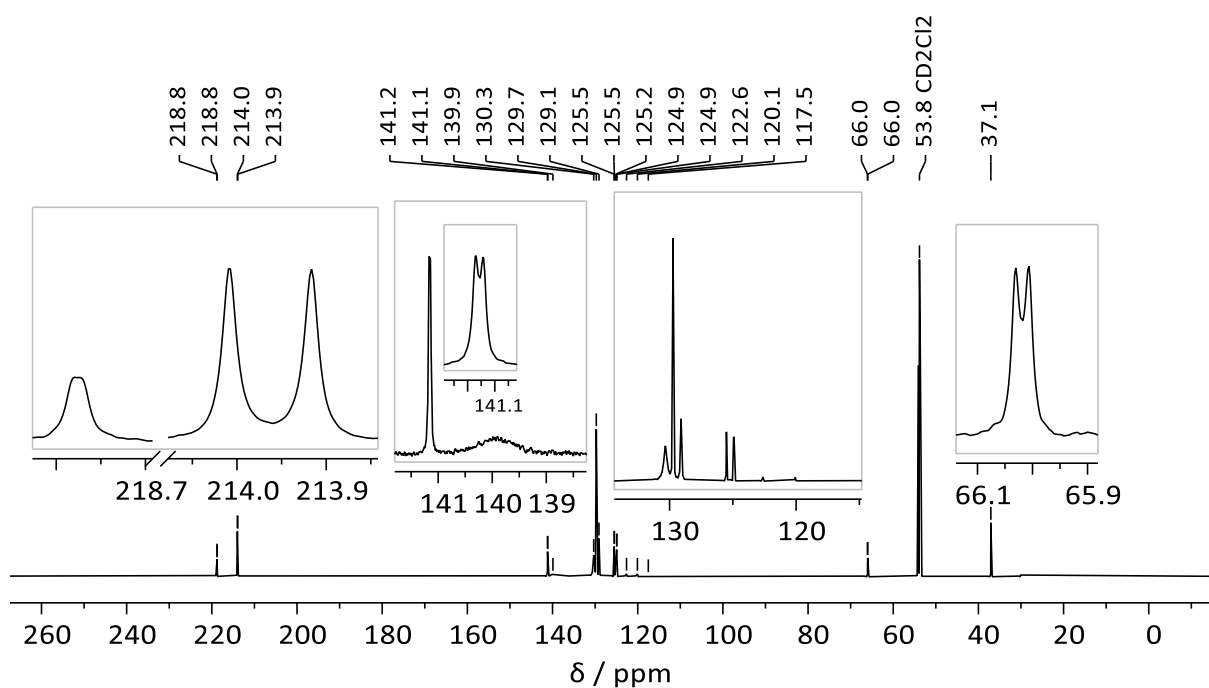

**Fig. S43**  $^{13}\text{C}\{^1\text{H}\}$  NMR spectrum (125.75 MHz,  $\text{CD}_2\text{Cl}_2$ , 298 K) of compound **11a-Cr**.

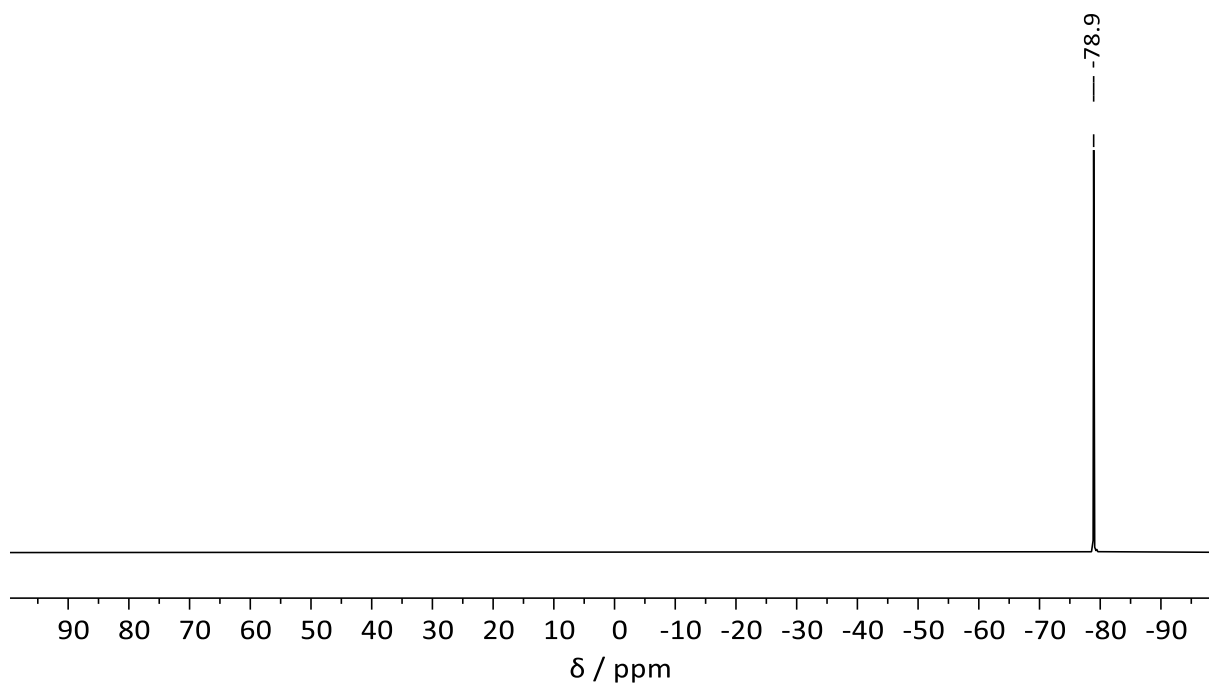

**Fig. S44**  $^{19}\text{F}$  NMR spectrum (470.51 MHz,  $\text{CD}_2\text{Cl}_2$ , 298 K) of compound **11a-Cr**.

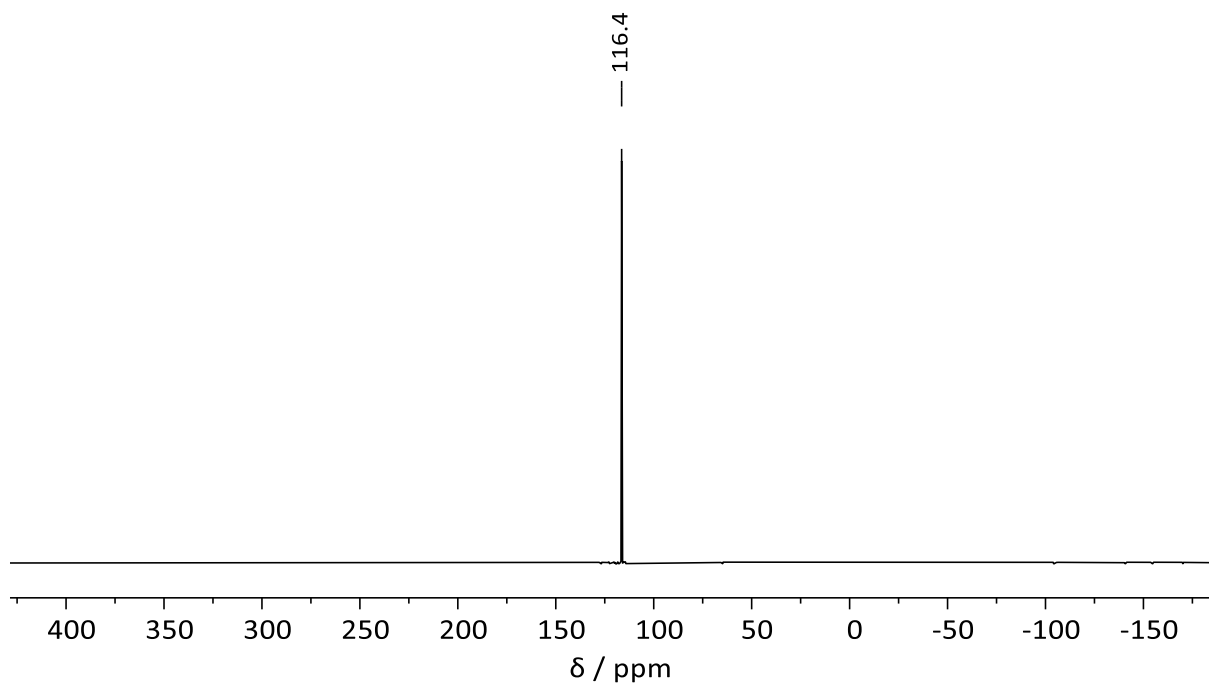

**Fig. S45**  $^{31}\text{P}\{^1\text{H}\}$  NMR spectrum (202.44 MHz,  $\text{CD}_2\text{Cl}_2$ , 298 K) of compound **11a-Cr**.

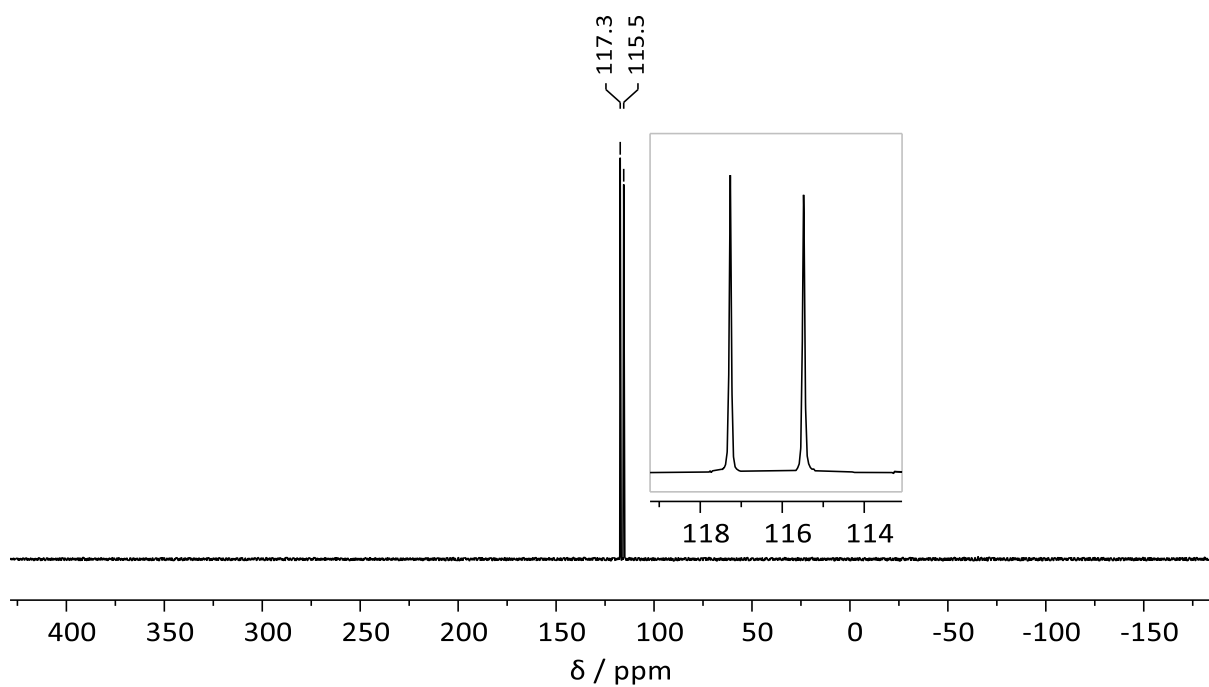

**Fig. S46**  $^{31}\text{P}$  NMR spectrum (202.44 MHz,  $\text{CD}_2\text{Cl}_2$ , 298 K) of compound **11a-Cr**.

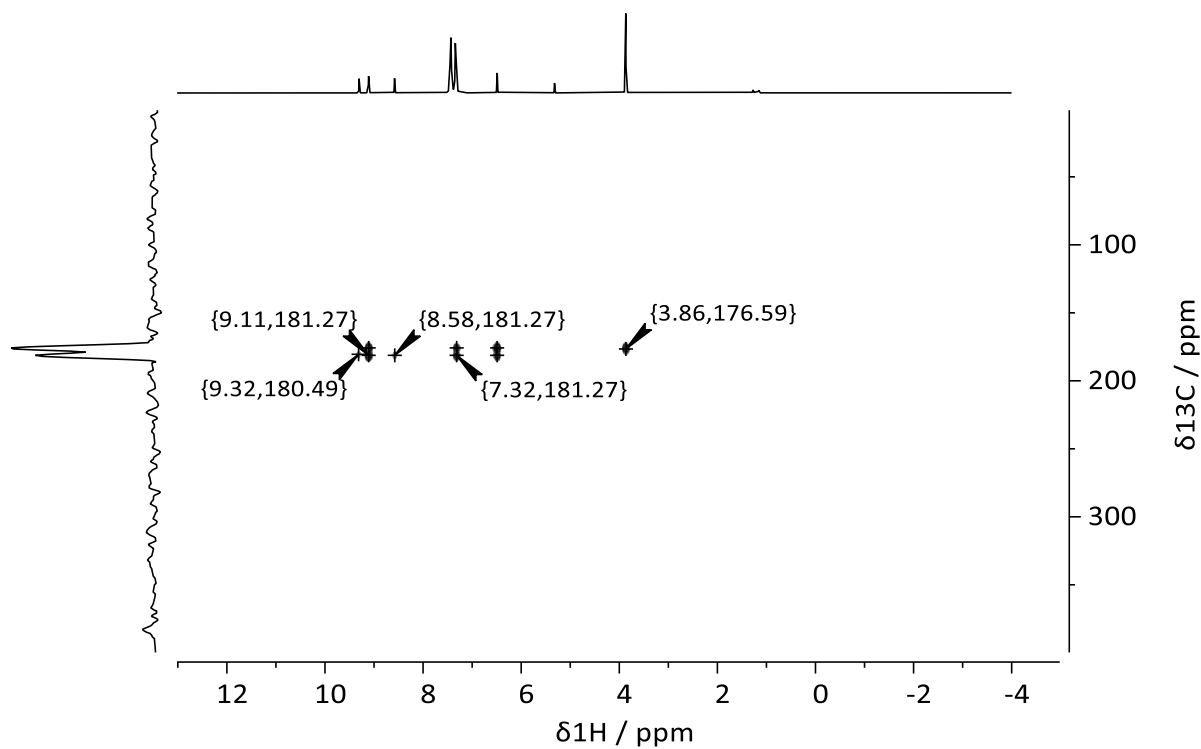

**Fig. S47**  $^1\text{H}, ^{15}\text{N}$  HMBC NMR spectrum (500.04 MHz, 50.68 MHz,  $\text{CD}_2\text{Cl}_2$ , 298 K) of compound **11a-Cr**.

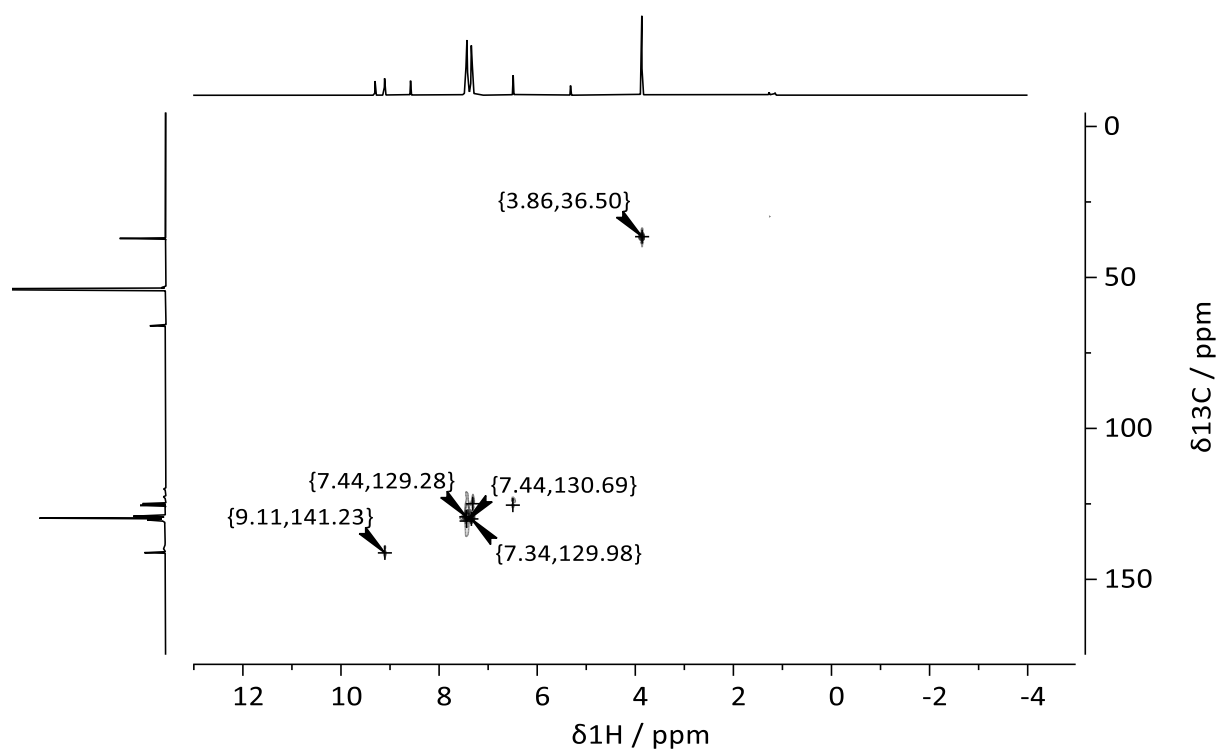

**Fig. S48**  $^1\text{H}, ^{13}\text{C}$  HSQC NMR spectrum (500.04 MHz, 125.75 MHz,  $\text{CD}_2\text{Cl}_2$ , 298 K) of compound **11a-Cr**.

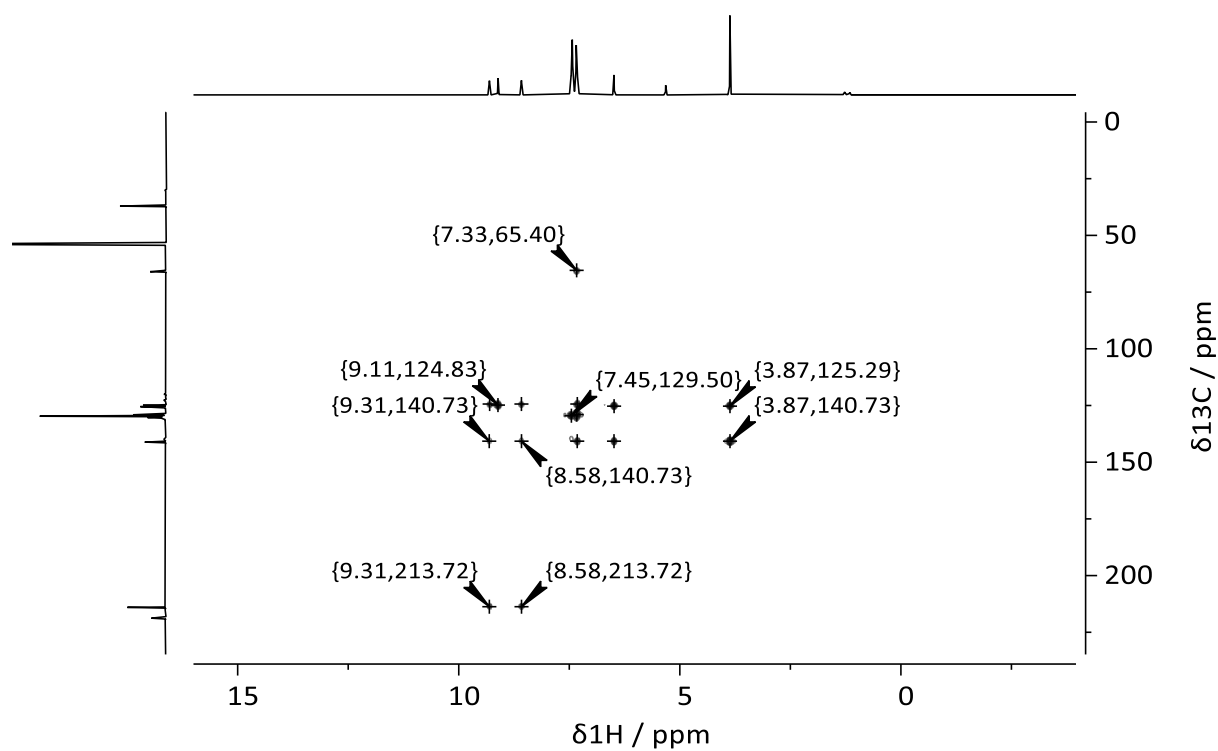

**Fig. S49**  $^1\text{H}$ ,  $^{13}\text{C}$  HMBC NMR spectrum (500.04 MHz, 125.75 MHz,  $\text{CD}_2\text{Cl}_2$ , 298 K) of compound **11a-Cr**.

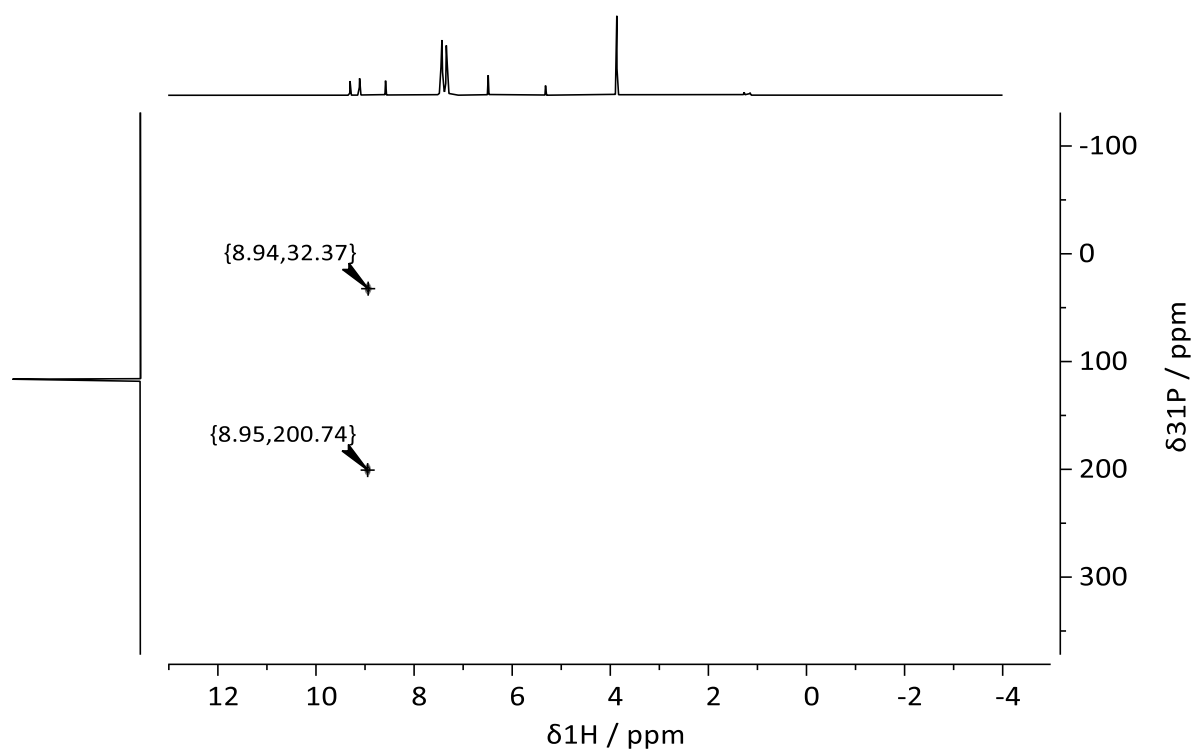

**Fig. S50**  $^1\text{H}$ ,  $^{31}\text{P}$  HMQC NMR spectrum (500.04 MHz, 202.44 MHz,  $\text{CD}_2\text{Cl}_2$ , 298 K) of compound **11a-Cr**.

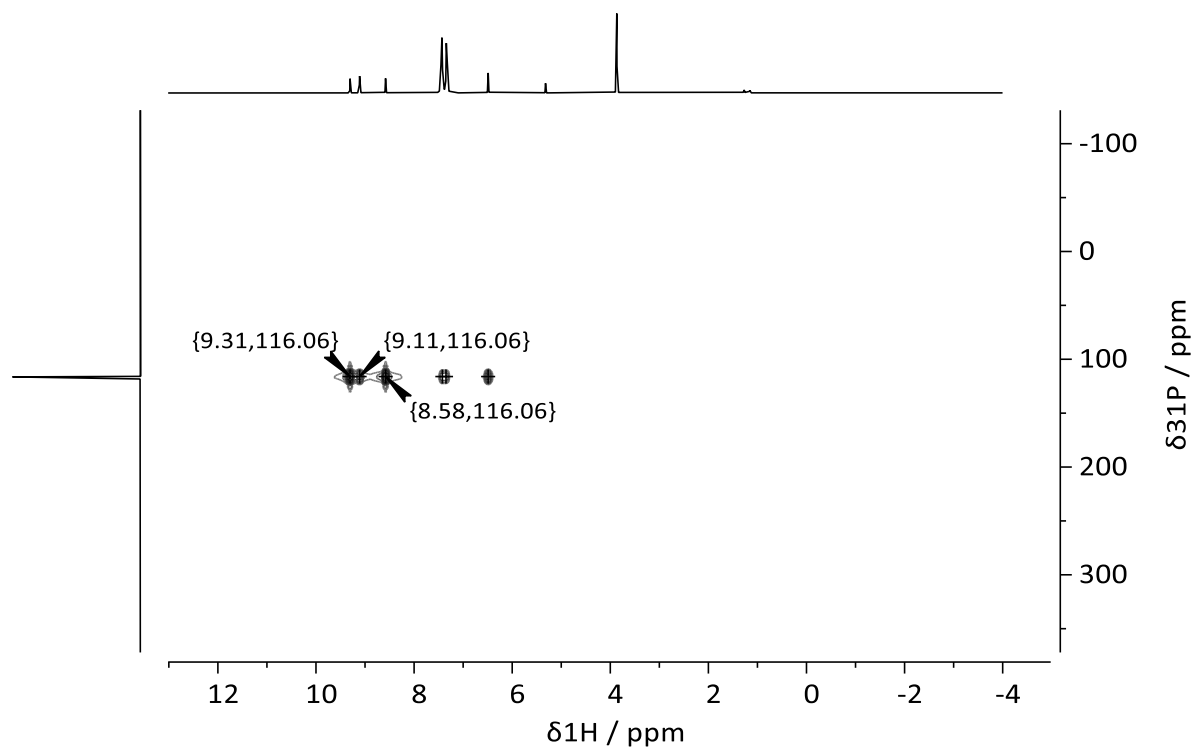

**Fig. S51**  $^1\text{H}$ ,  $^{31}\text{P}$  HMBC NMR spectrum (500.04 MHz, 202.44 MHz,  $\text{CD}_2\text{Cl}_2$ , 298 K) of compound **11a-Cr**.

**Compound 11b**

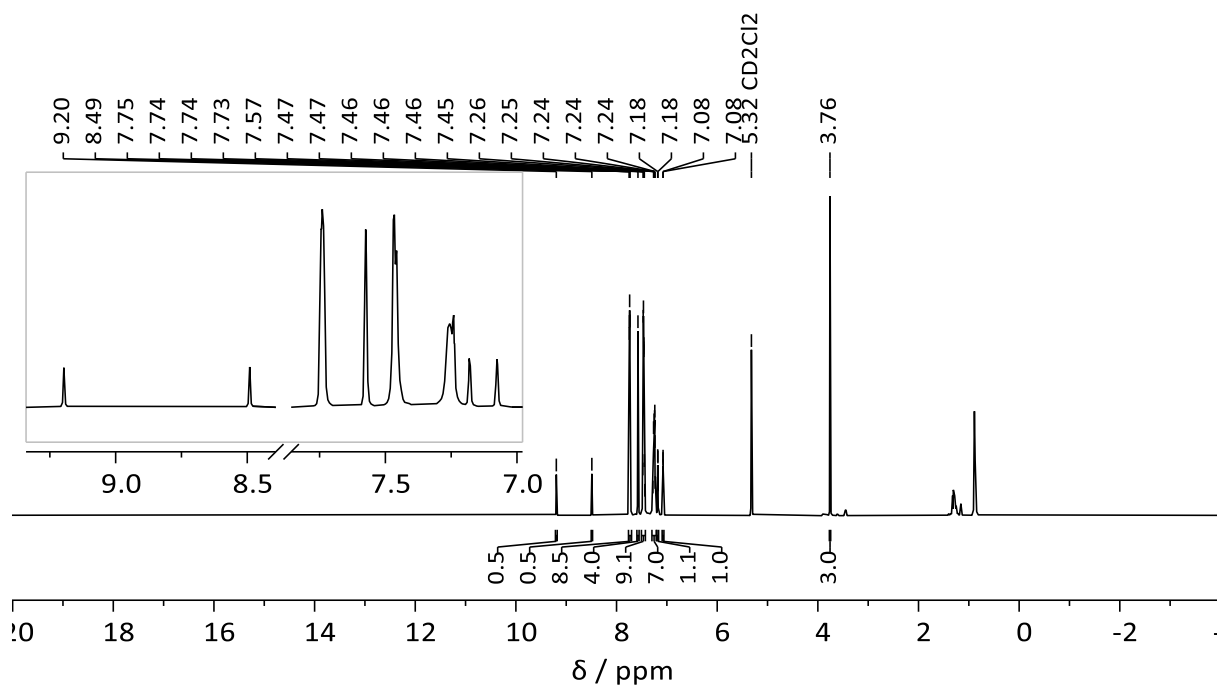

**Fig. S52**  $^1\text{H}$  NMR spectrum (500.04 MHz,  $\text{CD}_2\text{Cl}_2$ , 298 K) of compound **11b**.



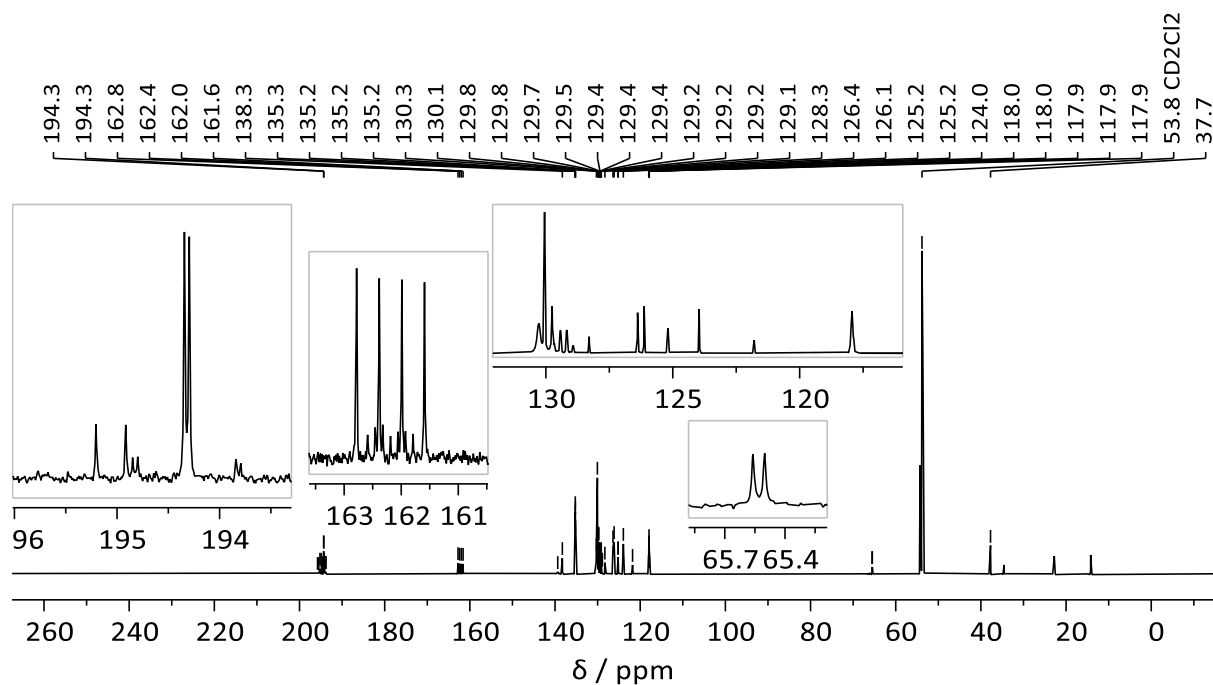

**Fig. S53**  $^{13}\text{C}\{^1\text{H}\}$  NMR spectrum (125.75 MHz,  $\text{CD}_2\text{Cl}_2$ , 298 K) of compound **11b**.

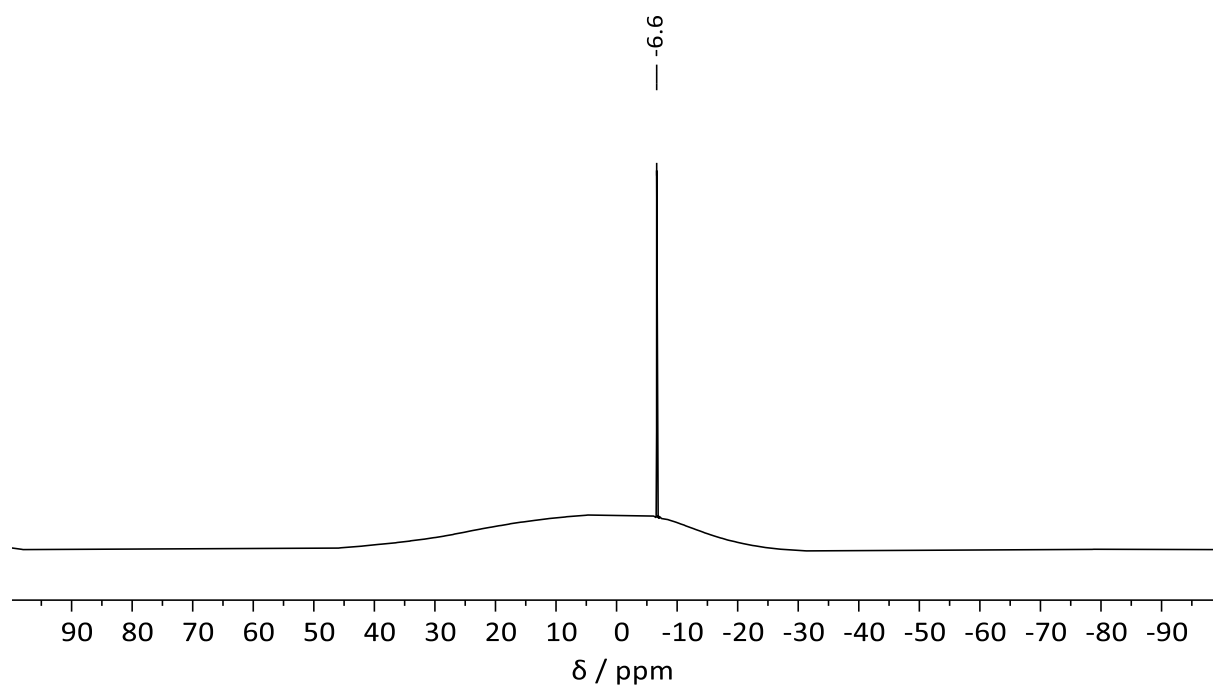

**Fig. S54**  $^{11}\text{B}\{^1\text{H}\}$  NMR spectrum (160.43 MHz,  $\text{CD}_2\text{Cl}_2$ , 298 K) of compound **11b**.

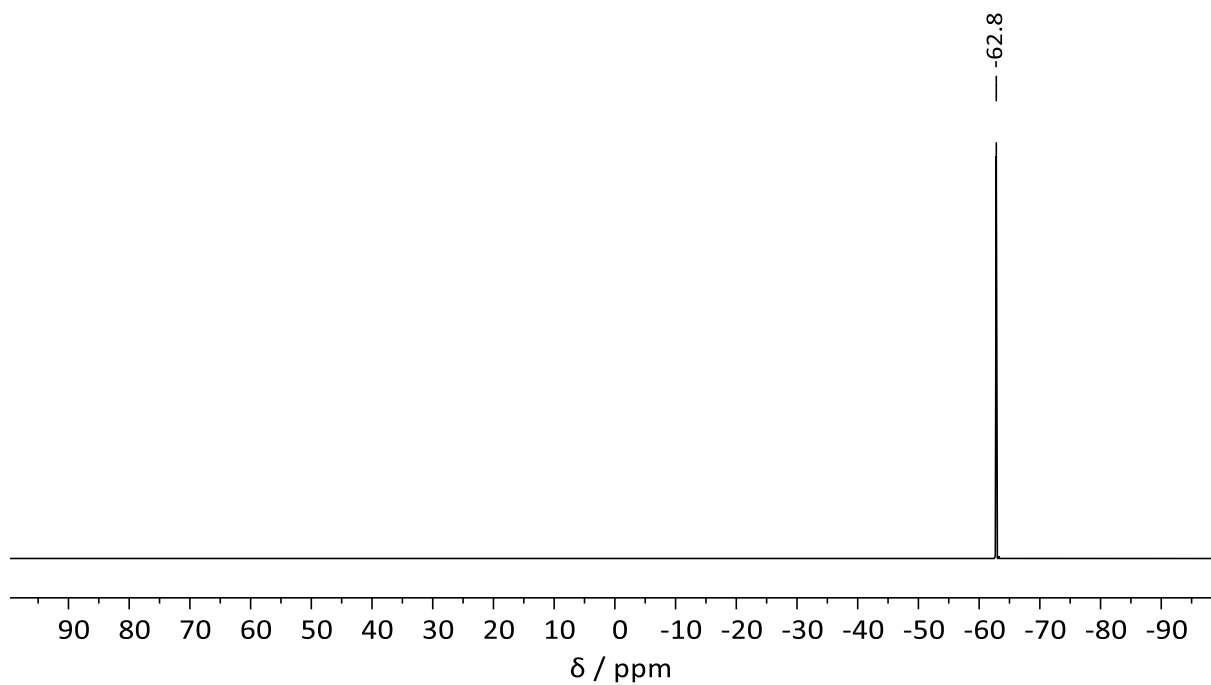

Fig. S55  $^{19}\text{F}$  NMR spectrum (470.51 MHz,  $\text{CD}_2\text{Cl}_2$ , 298 K) of compound **11b**.

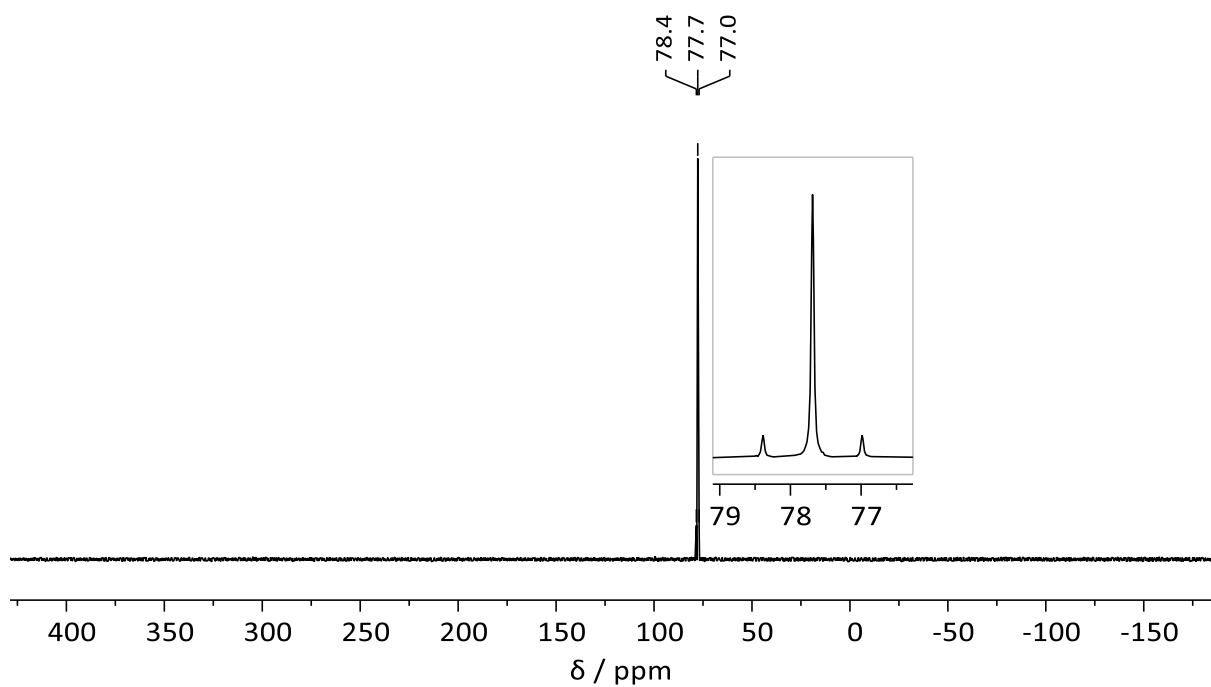

Fig. S56  $^{31}\text{P}\{^1\text{H}\}$  NMR spectrum (202.44 MHz,  $\text{CD}_2\text{Cl}_2$ , 298 K) of compound **11b**.

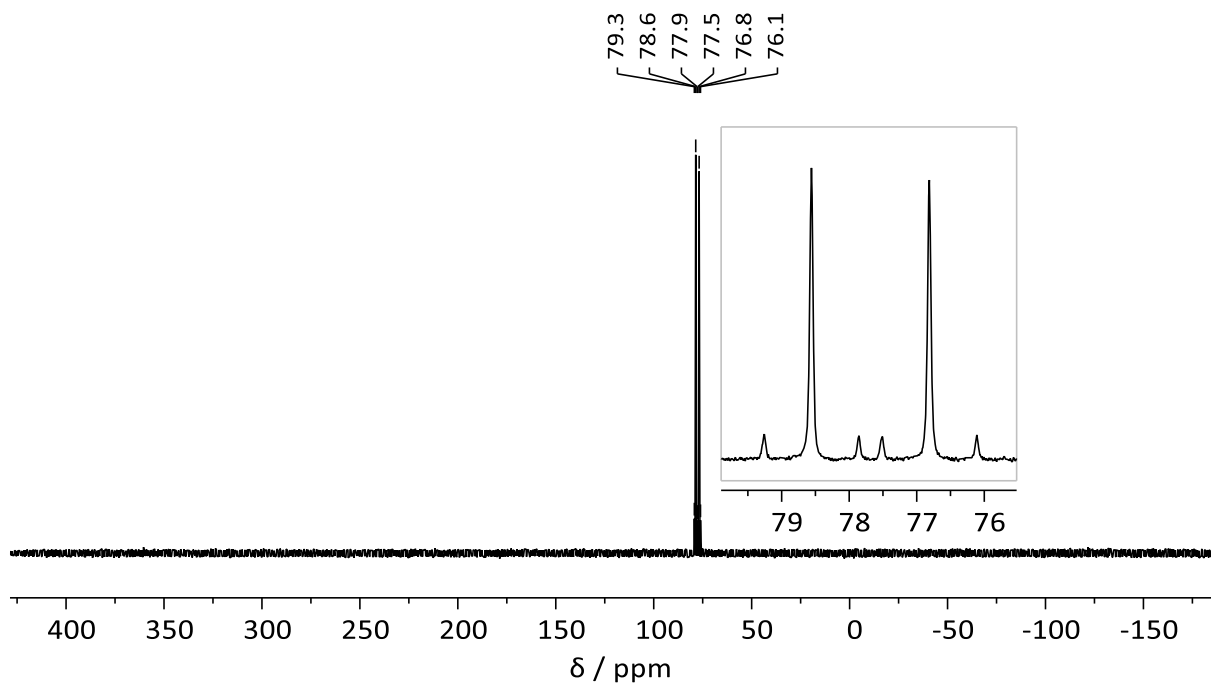

**Fig. S57** <sup>31</sup>P NMR spectrum (202.44 MHz, CD<sub>2</sub>Cl<sub>2</sub>, 298 K) of compound **11b**.

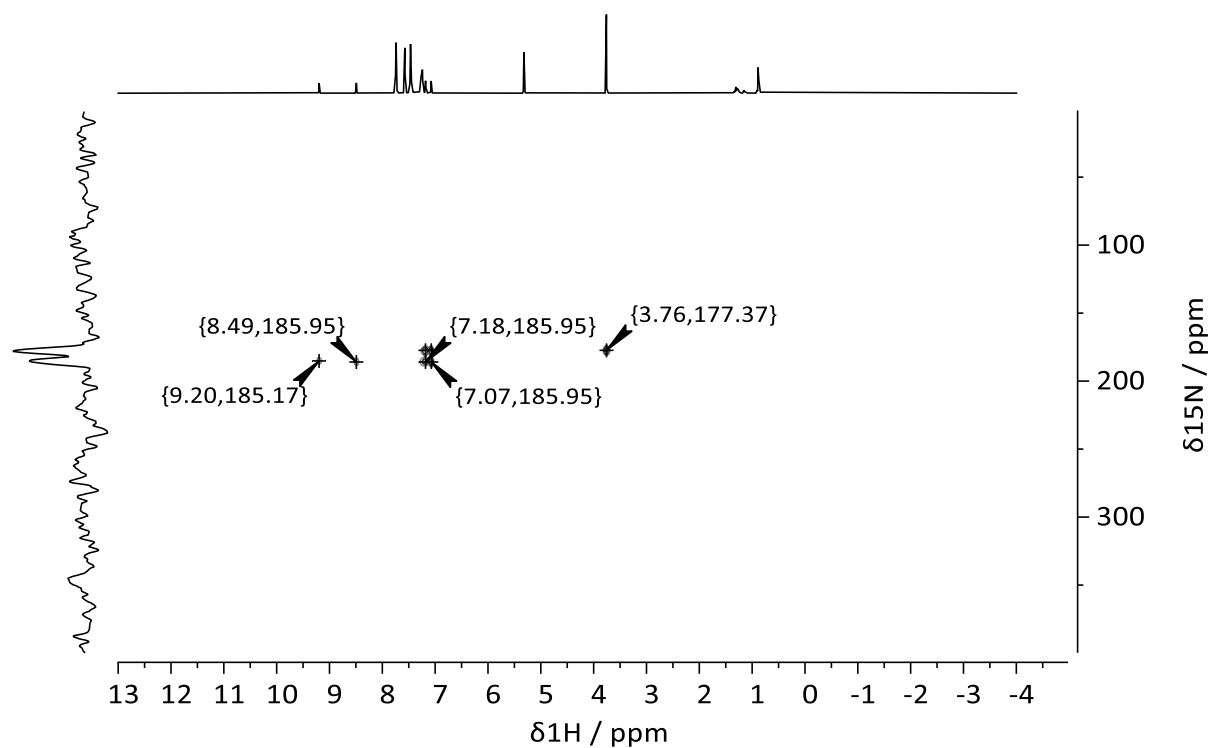

**Fig. S58** <sup>1</sup>H, <sup>15</sup>N HMBC NMR spectrum (500.04 MHz, 50.68 MHz, CD<sub>2</sub>Cl<sub>2</sub>, 298 K) of compound **11b**.

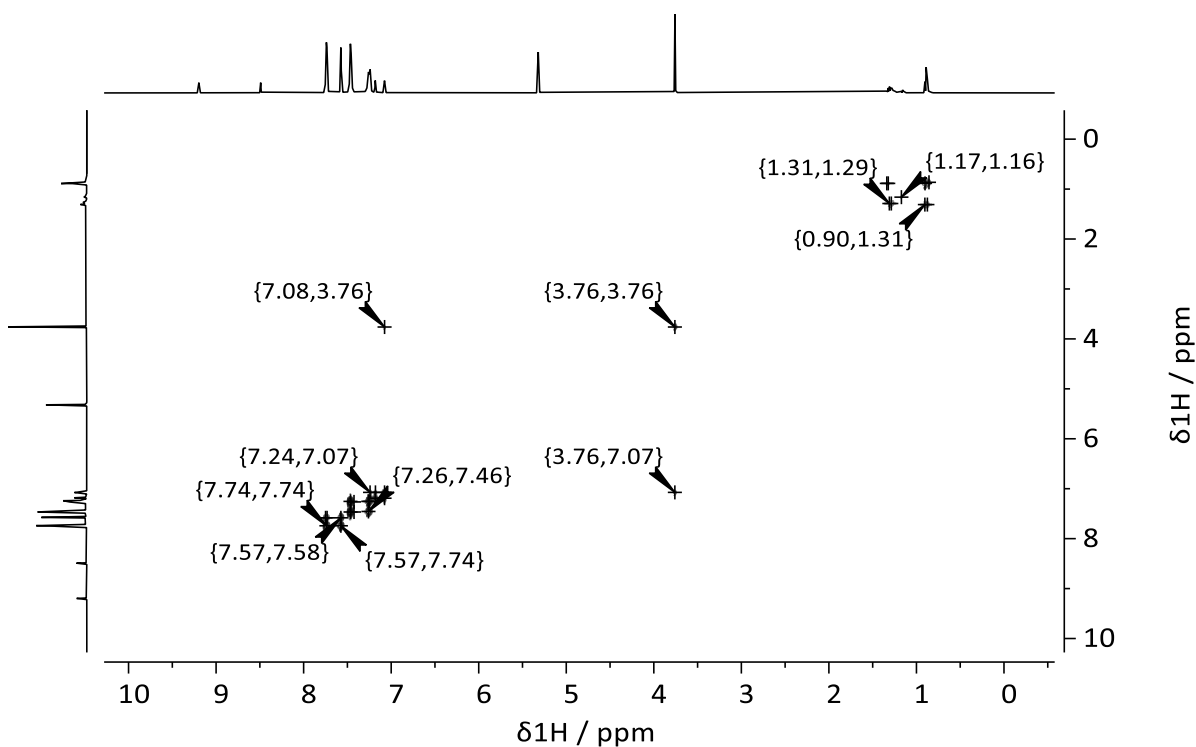

**Fig. S59**  $^1\text{H}, ^1\text{H}$  COSY NMR spectrum (500.04 MHz, 500.04 MHz,  $\text{CD}_2\text{Cl}_2$ , 298 K) of compound **11b**.

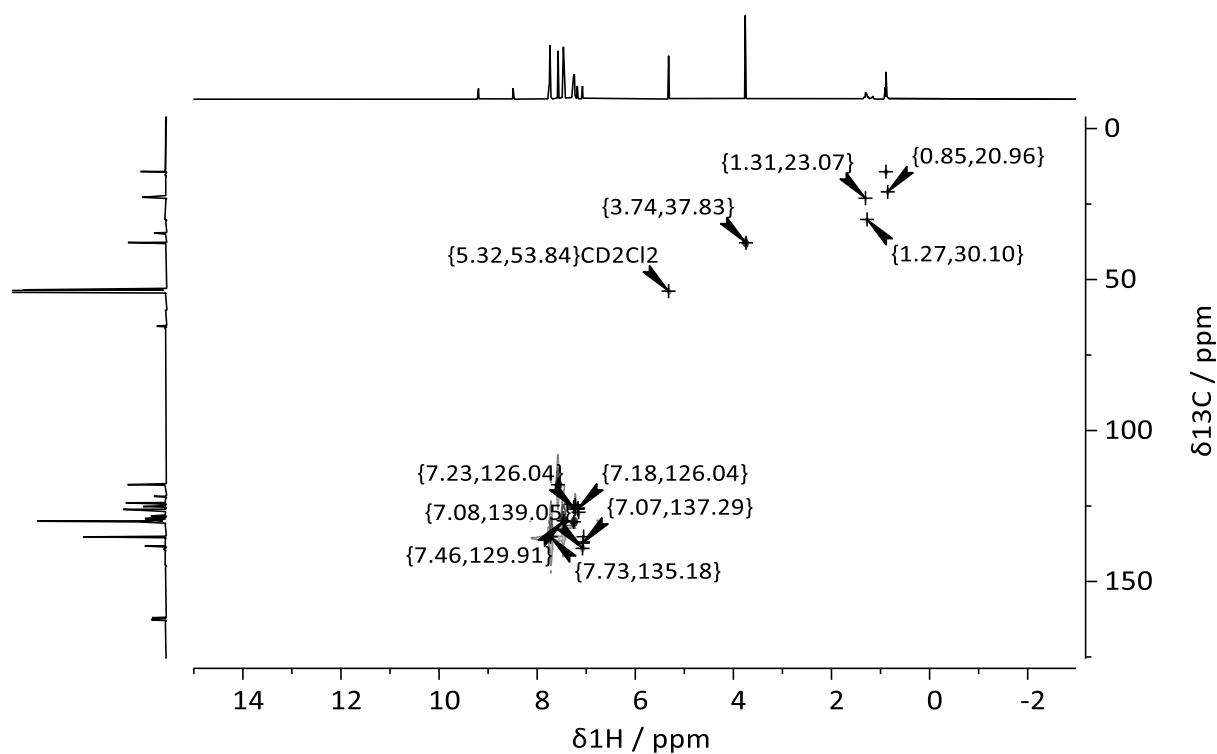

**Fig. S60**  $^1\text{H}, ^{13}\text{C}$  HSQC NMR spectrum (500.04 MHz, 125.75 MHz,  $\text{CD}_2\text{Cl}_2$ , 298 K) of compound **11b**.

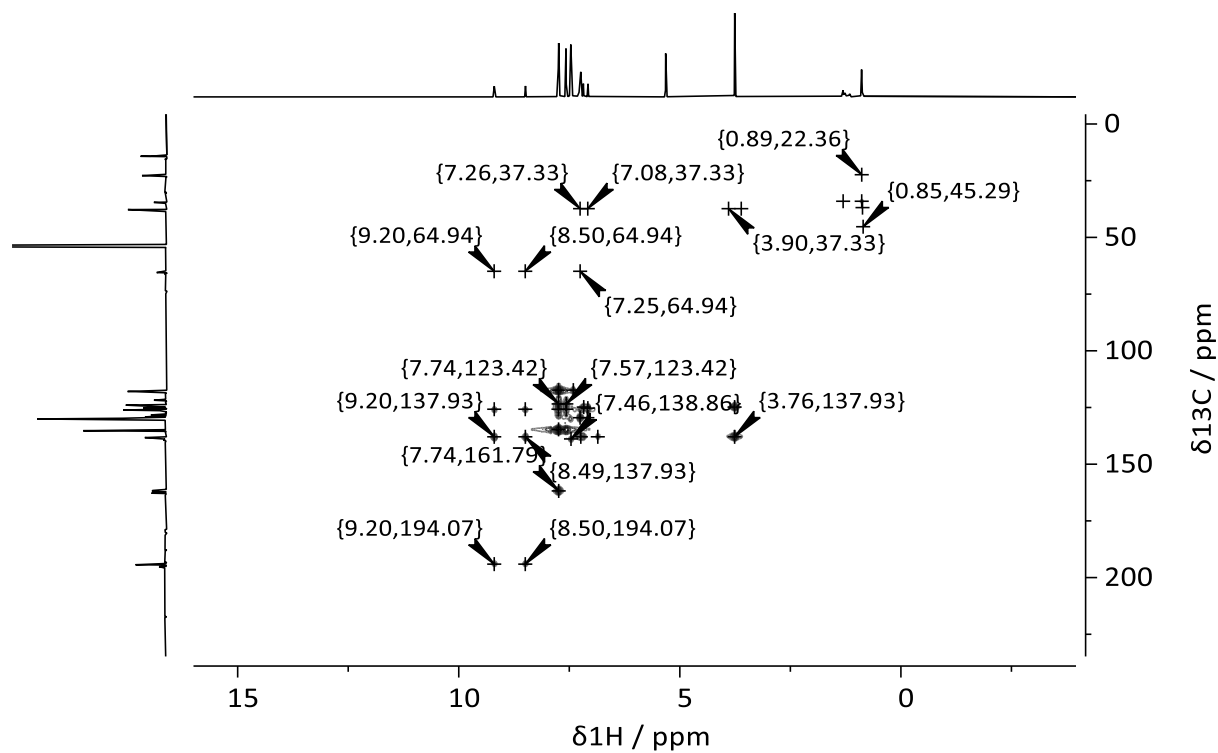

**Fig. S61**  $^1\text{H}$ ,  $^{13}\text{C}$  HMBC NMR spectrum (500.04 MHz, 125.75 MHz,  $\text{CD}_2\text{Cl}_2$ , 298 K) of compound **11b**.

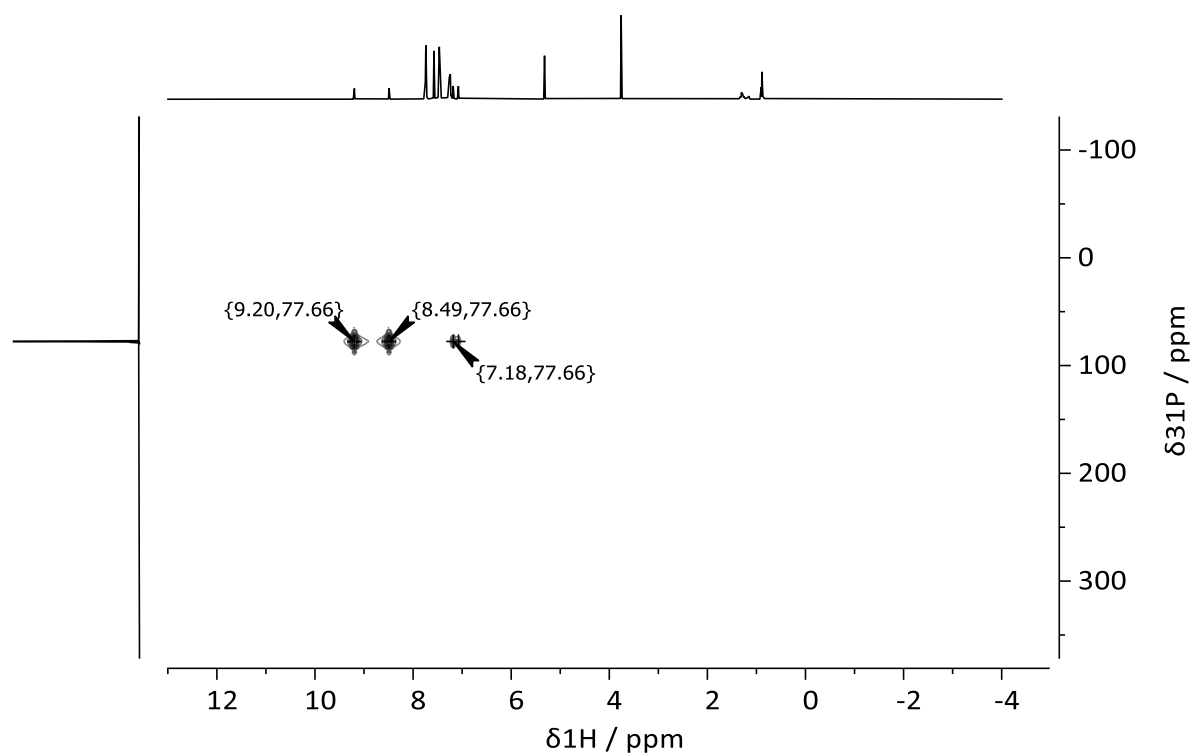

**Fig. S62**  $^1\text{H}$ ,  $^{31}\text{P}$  HMBC NMR spectrum (500.04 MHz, 202.44 MHz,  $\text{CD}_2\text{Cl}_2$ , 298 K) of compound **11b**.

### Compound 11c

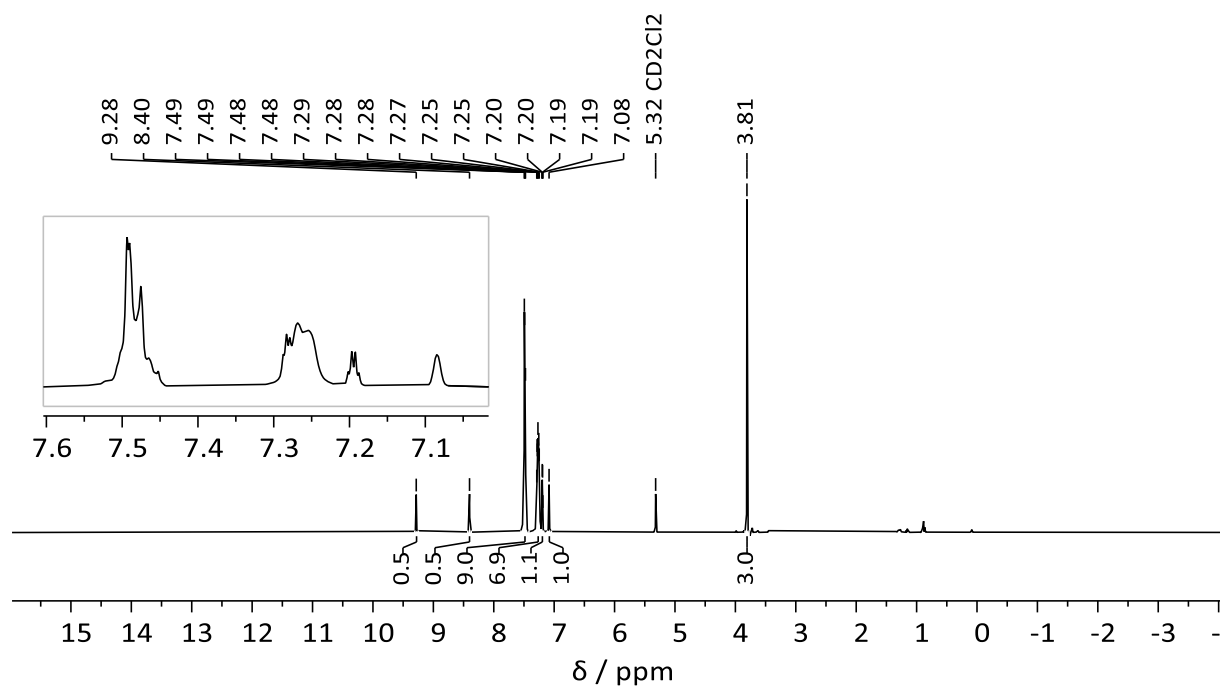

**Fig. S63**  $^1\text{H}$  NMR spectrum (400.13 MHz,  $\text{CD}_2\text{Cl}_2$ , 298 K) of compound **11c**.

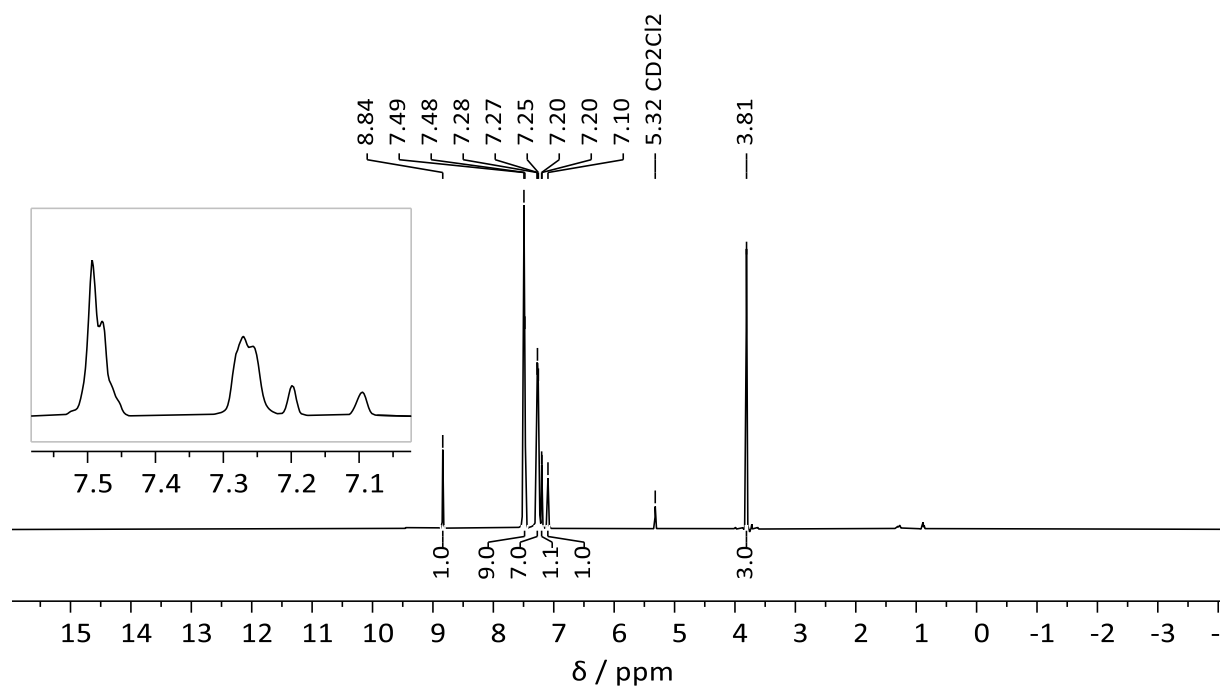

**Fig. S64**  $^1\text{H}\{^{31}\text{P}\}$  NMR spectrum (400.13 MHz,  $\text{CD}_2\text{Cl}_2$ , 298 K) of compound **11c**.

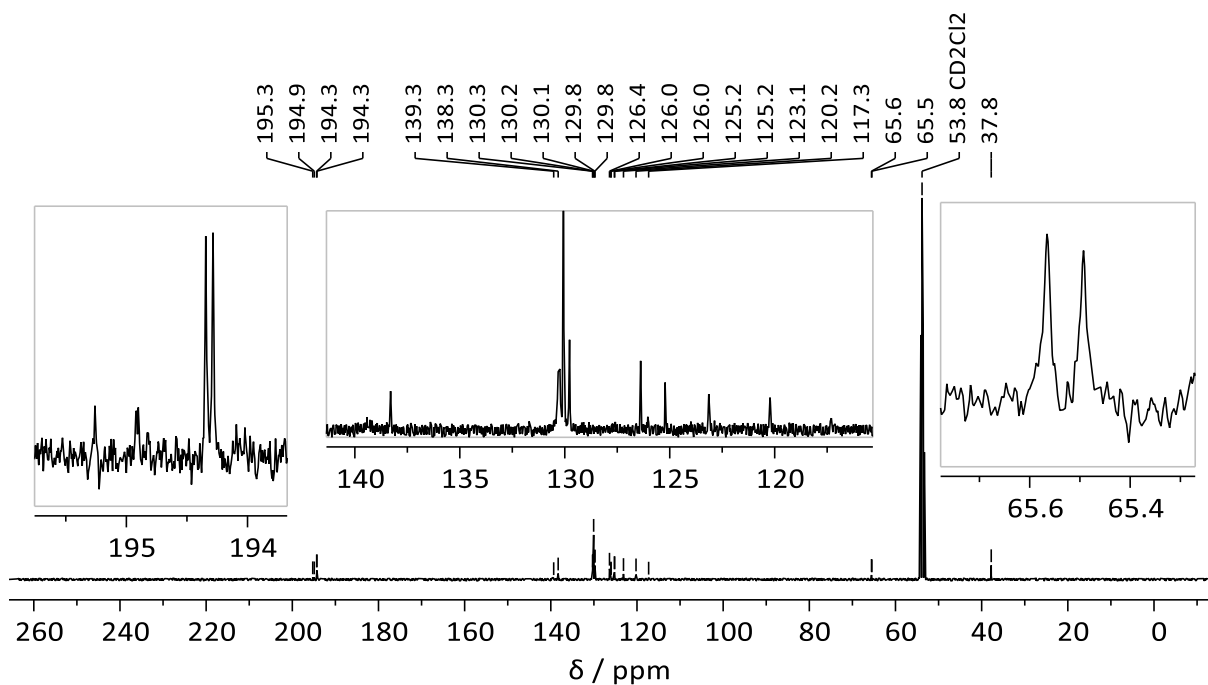

**Fig. S65**  $^{13}\text{C}\{^1\text{H}\}$  NMR spectrum (100.63 MHz,  $\text{CD}_2\text{Cl}_2$ , 298 K) of compound **11c**.

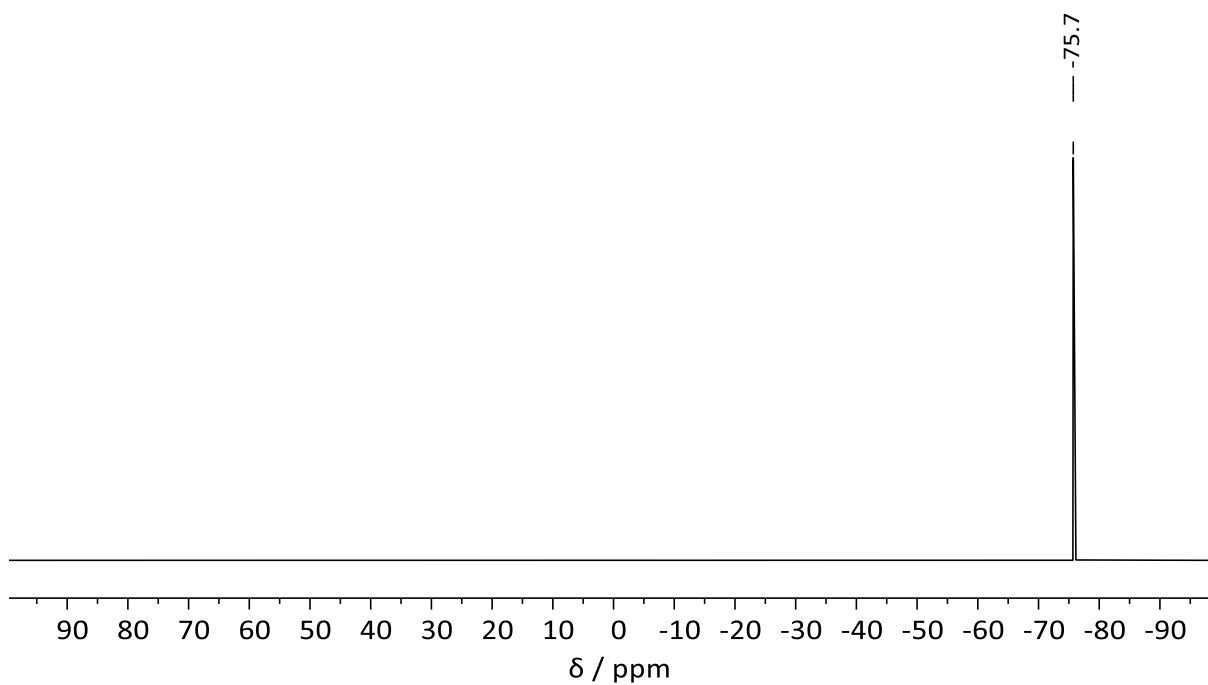

**Fig. S66**  $^{19}\text{F}$  NMR spectrum (470.51 MHz,  $\text{CD}_2\text{Cl}_2$ , 298 K) of compound **11c**.

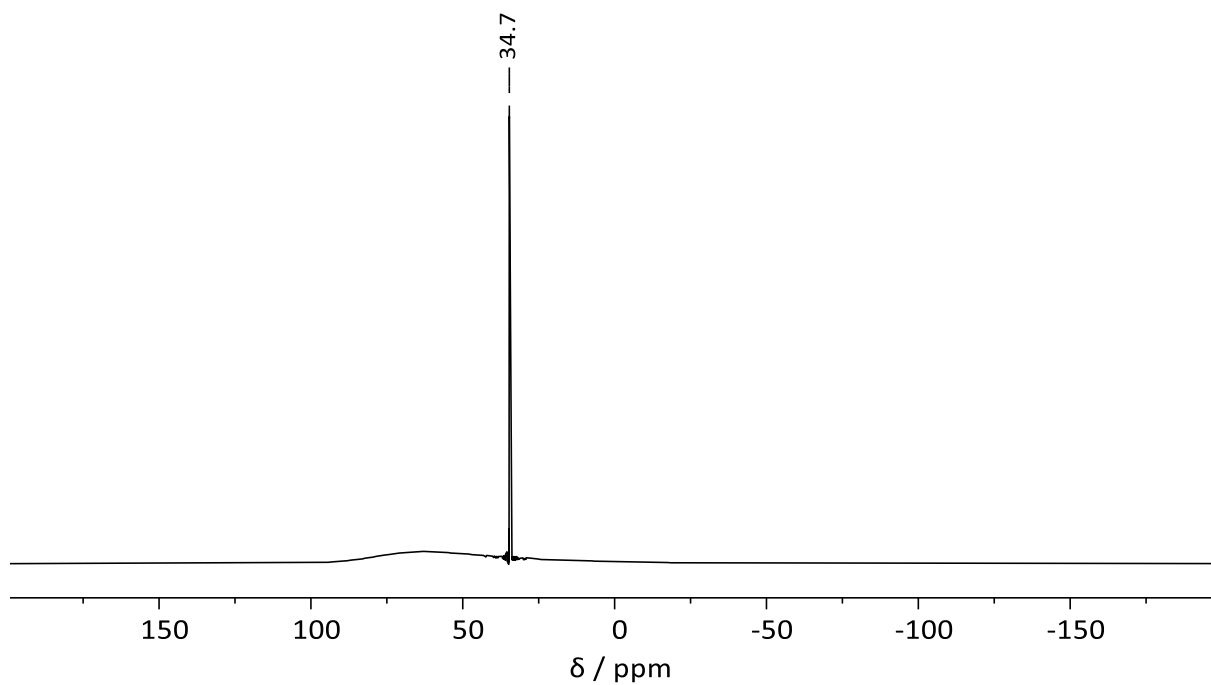

**Fig. S67**  $^{27}\text{Al}\{^1\text{H}\}$  NMR spectrum (78.20 MHz,  $\text{CD}_2\text{Cl}_2$ , 298 K) of compound **11c**.

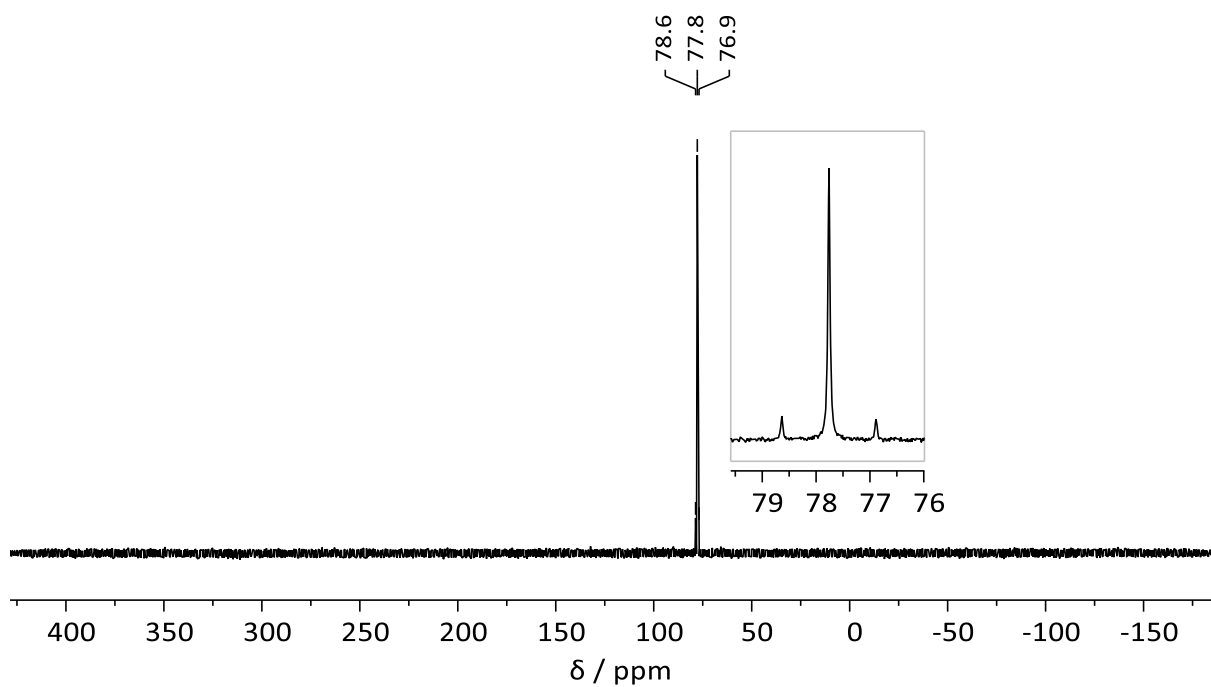

**Fig. S68**  $^{31}\text{P}\{^1\text{H}\}$  NMR spectrum (162.00 MHz,  $\text{CD}_2\text{Cl}_2$ , 298 K) of compound **11c**.



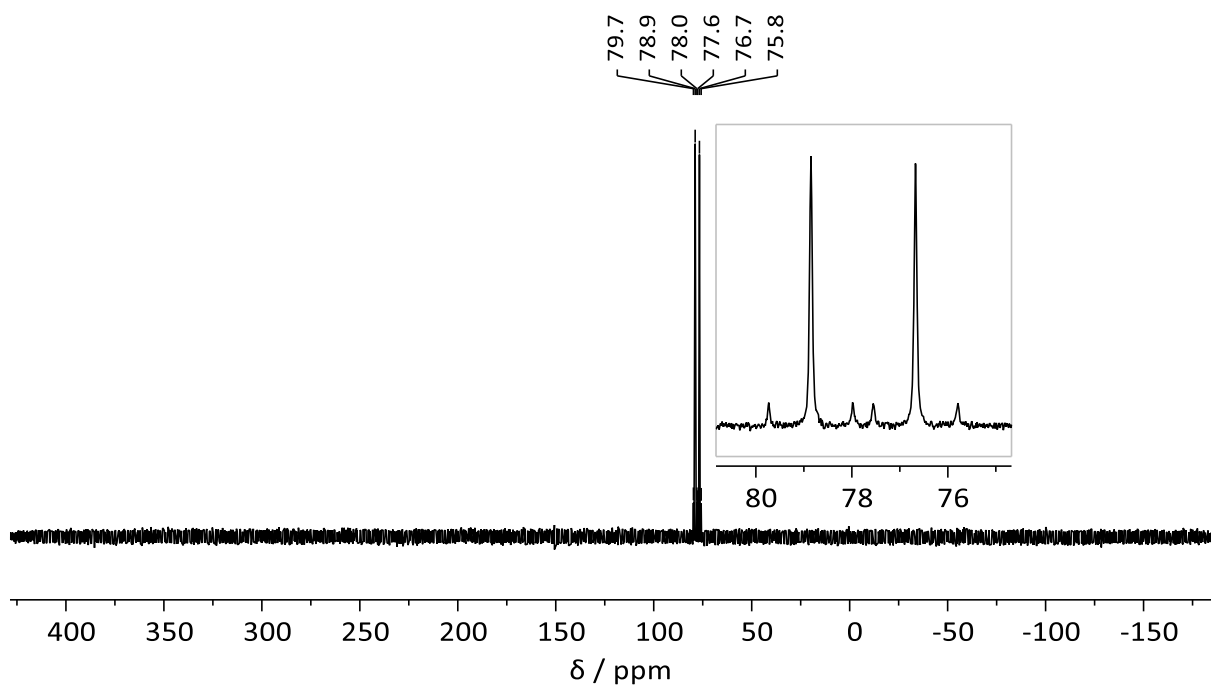

**Fig. S69** <sup>31</sup>P NMR spectrum (162.00 MHz, CD<sub>2</sub>Cl<sub>2</sub>, 298 K) of compound **11c**.

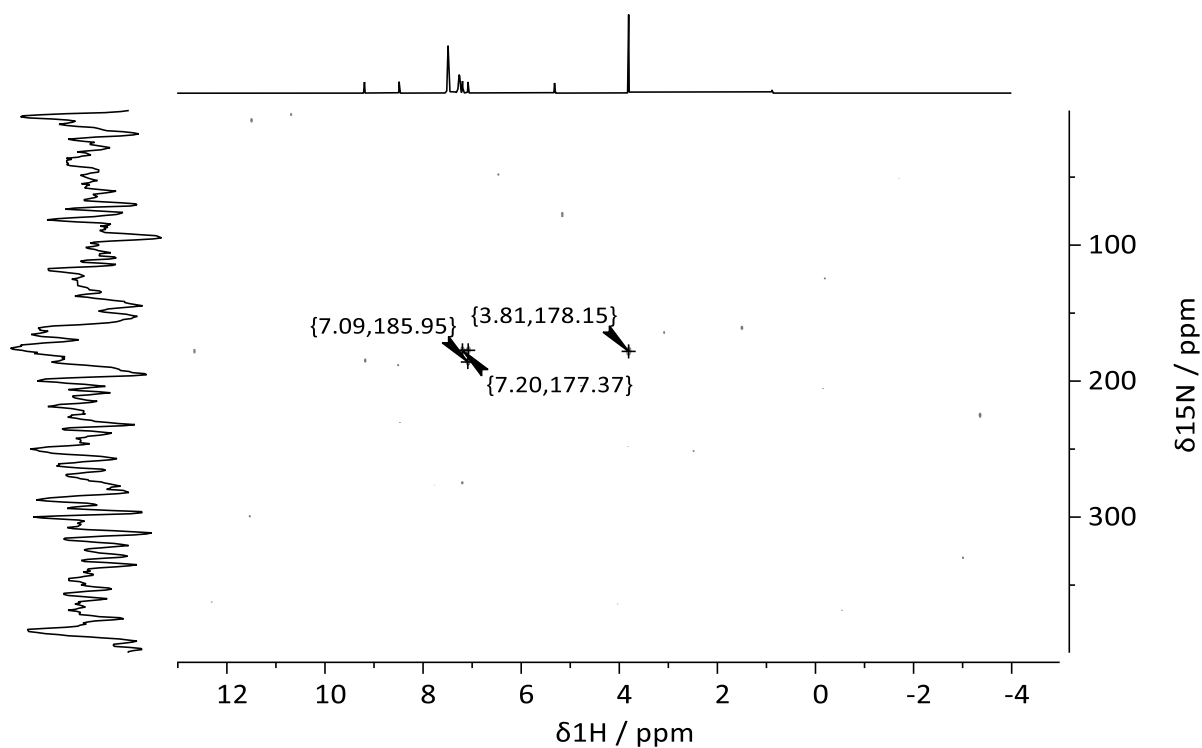

**Fig. S70** <sup>1</sup>H,<sup>15</sup>N HMBC NMR spectrum (500.04 MHz, 50.68 MHz, CD<sub>2</sub>Cl<sub>2</sub>, 298 K) of compound **11c**.

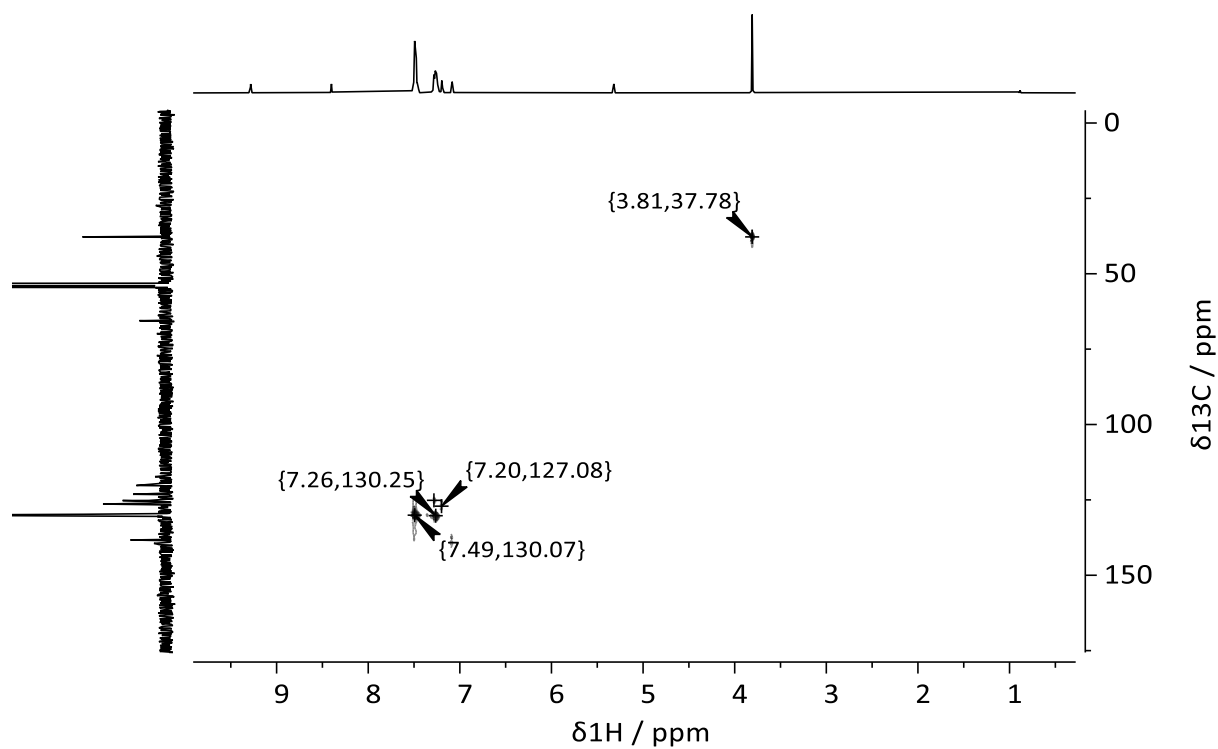

**Fig. S71**  $^1\text{H}$ ,  $^{13}\text{C}$  HSQC NMR spectrum (400.13 MHz, 100.62 MHz,  $\text{CD}_2\text{Cl}_2$ , 298 K) of compound **11c**.

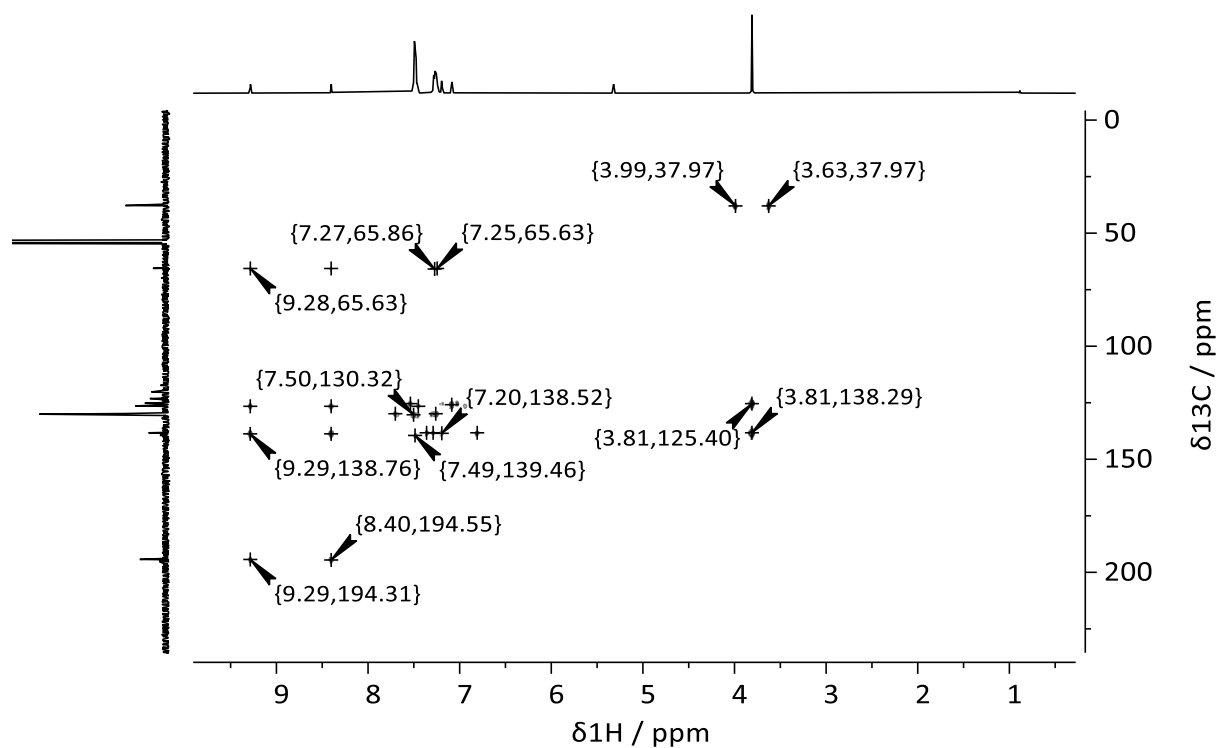

**Fig. S72**  $^1\text{H}$ ,  $^{13}\text{C}$  HMBC NMR spectrum (400.13 MHz, 100.62 MHz,  $\text{CD}_2\text{Cl}_2$ , 298 K) of compound **11c**.

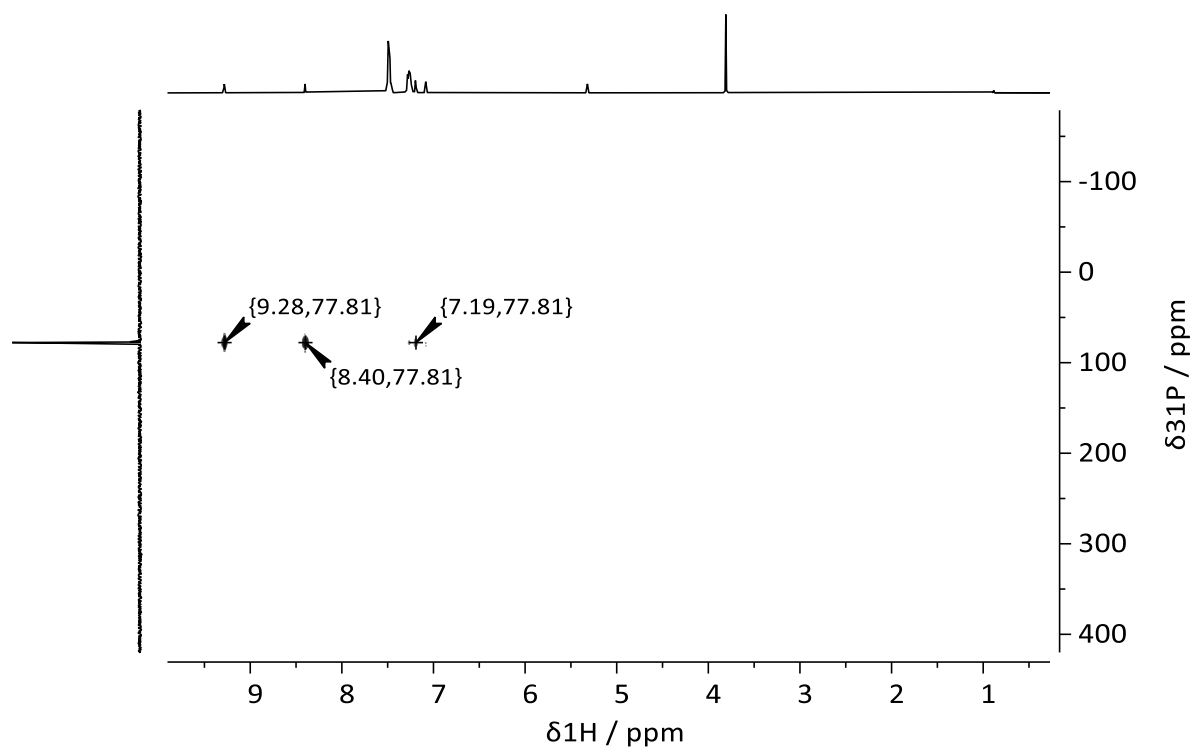

**Fig. S73**  $^1\text{H}$ ,  $^{31}\text{P}$  HMBC NMR spectrum (400.13 MHz, 162.00 MHz,  $\text{CD}_2\text{Cl}_2$ , 298 K) of compound **11c**.

#### Decomposition of compound **11c** in $\text{THF-d}_8$

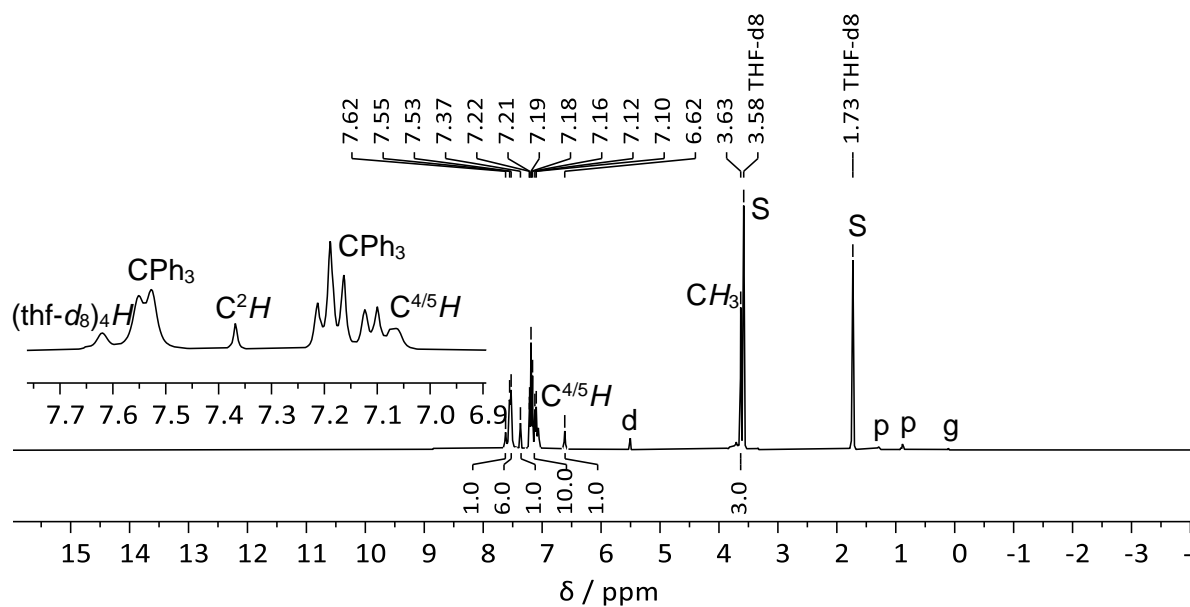

**Fig. S74**  $^1\text{H}$  NMR spectrum (300.13 MHz,  $\text{THF-d}_8$ , 298 K) of the decomposition mixture of compound **11c** in  $\text{THF-d}_8$ . The resonances of traces of dichloromethane are marked with a “d”, of *n*-pentane with a “p” and of grease with a “g”. The residual resonance signals of the deuterated solvent are marked with an “S”.

Compound 11c-Cr

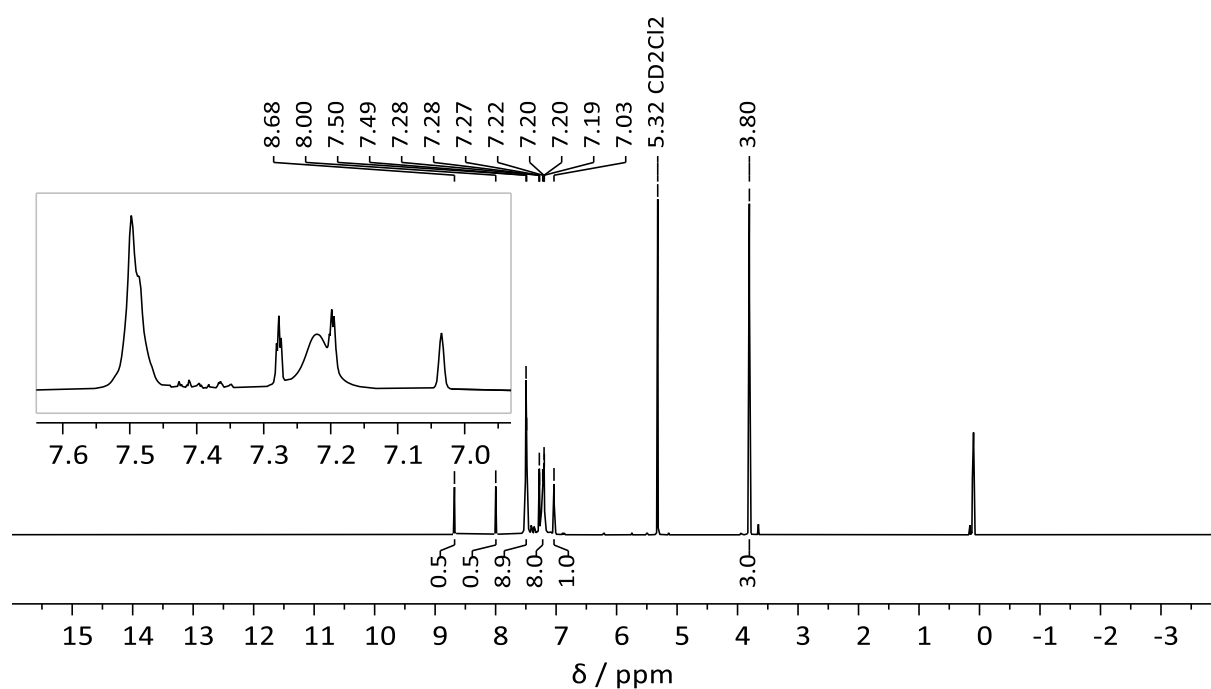

Fig. S75 <sup>1</sup>H NMR spectrum (500.04 MHz, CD<sub>2</sub>Cl<sub>2</sub>, 298 K) of compound 11c-Cr.

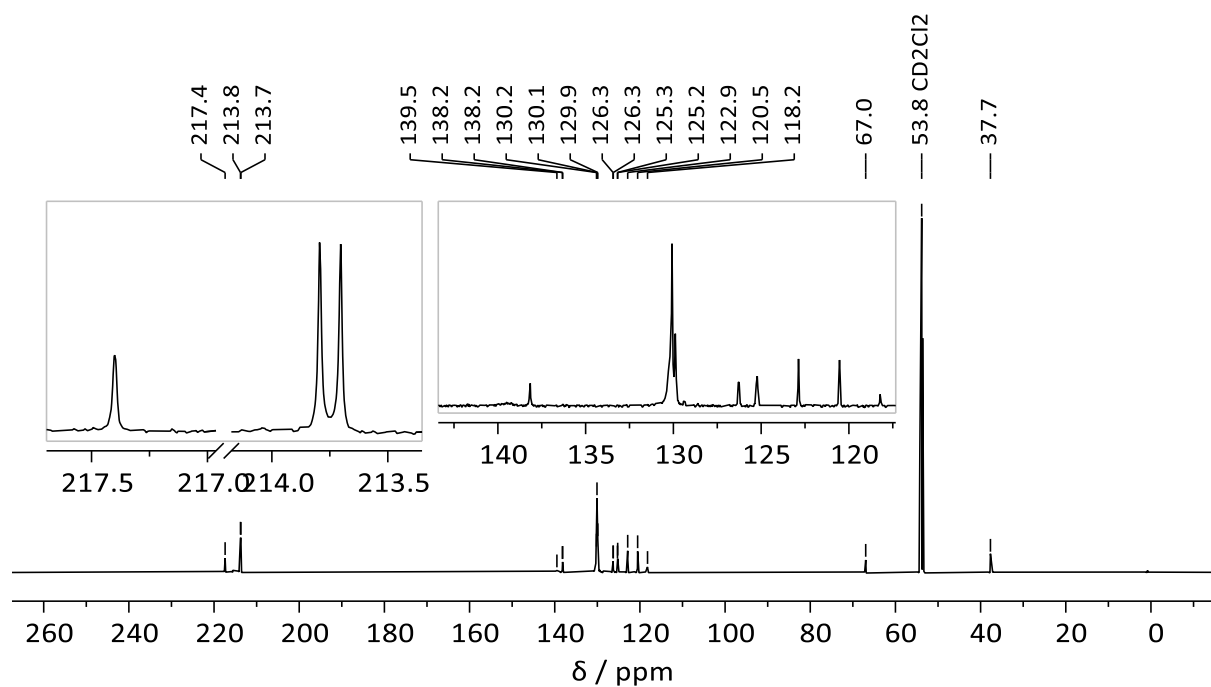

Fig. S76 <sup>13</sup>C{<sup>1</sup>H} NMR spectrum (125.75 MHz, CD<sub>2</sub>Cl<sub>2</sub>, 298 K) of compound 11c-Cr.

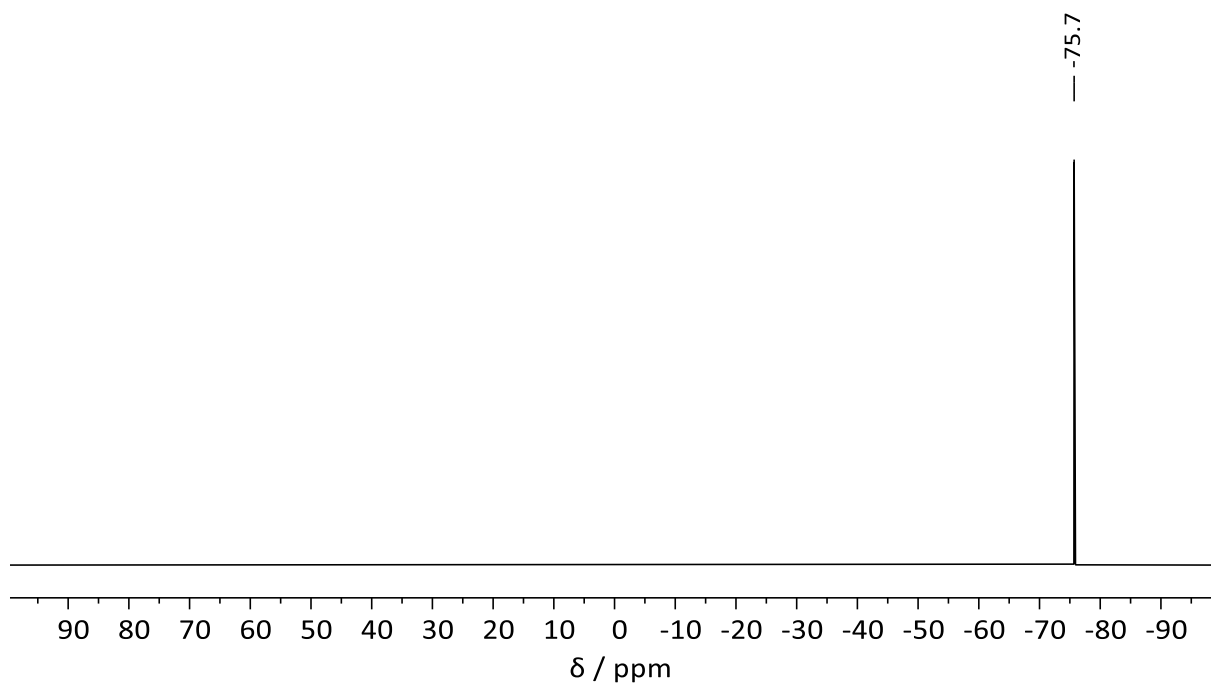

**Fig. S77**  $^{19}\text{F}$  NMR spectrum (470.51 MHz,  $\text{CD}_2\text{Cl}_2$ , 298 K) of compound **11c-Cr**.

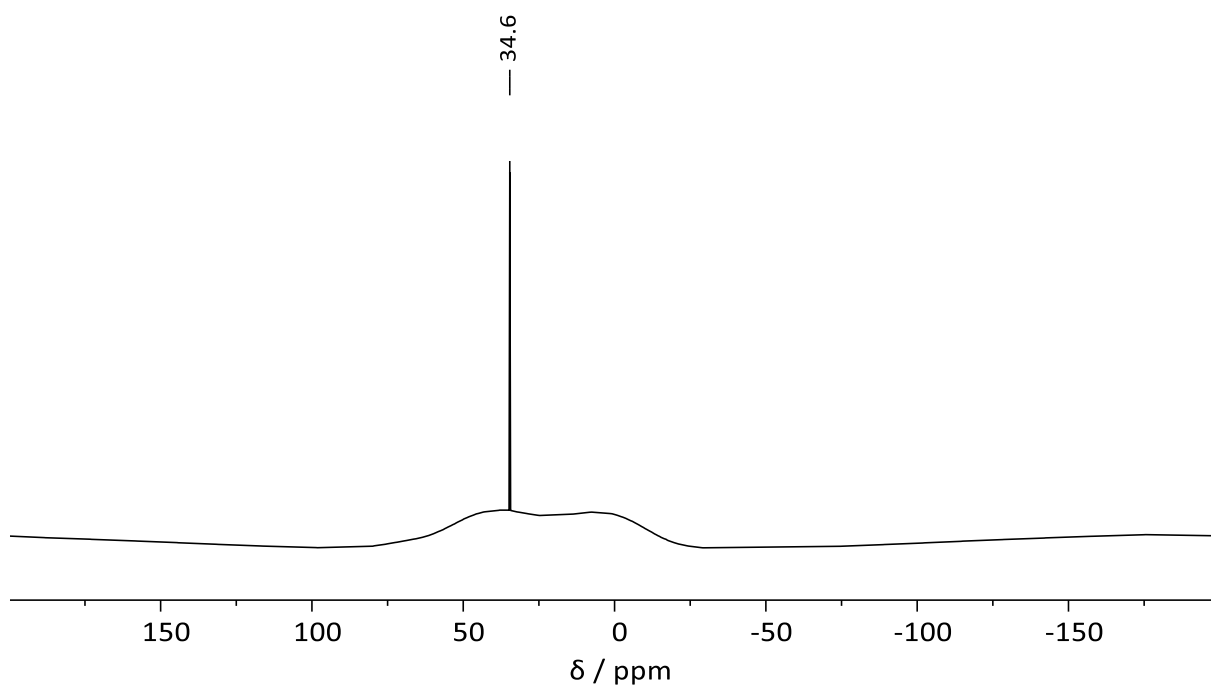

**Fig. S78**  $^{27}\text{Al}\{^1\text{H}\}$  NMR spectrum (130.29 MHz,  $\text{CD}_2\text{Cl}_2$ , 298 K) of compound **11c-Cr**.

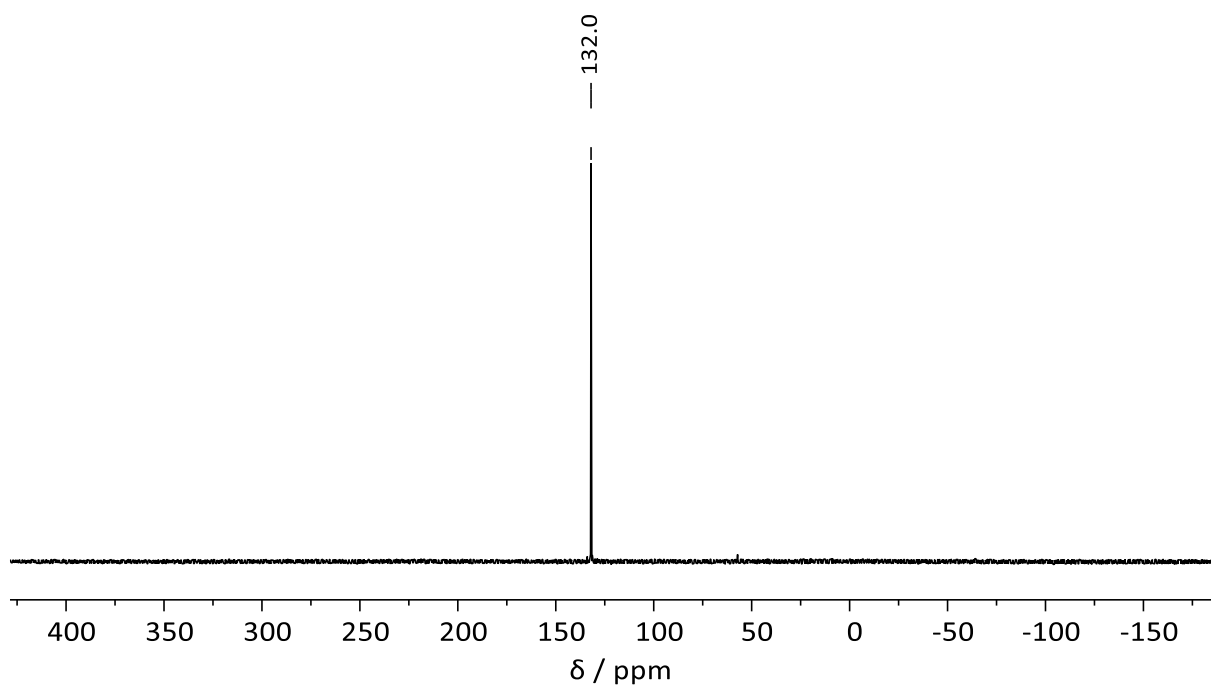

**Fig. S79**  $^{31}\text{P}\{^1\text{H}\}$  NMR spectrum (202.44 MHz,  $\text{CD}_2\text{Cl}_2$ , 298 K) of compound **11c-Cr**.

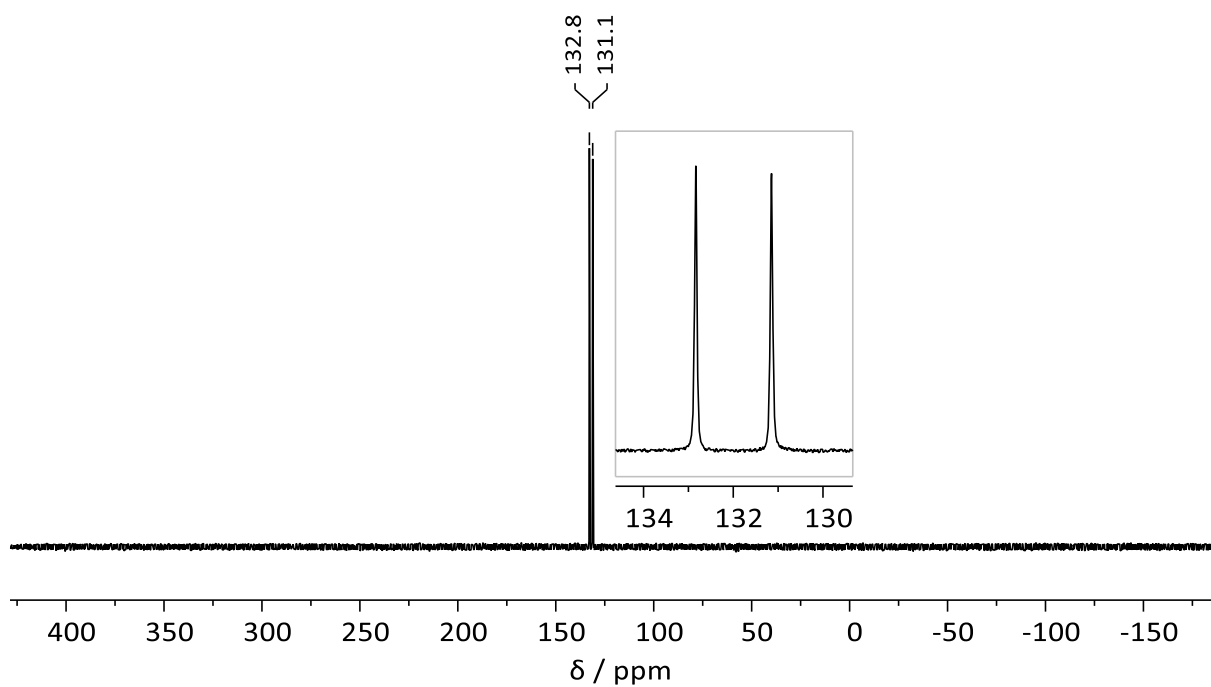

**Fig. S80**  $^{31}\text{P}$  NMR spectrum (202.44 MHz,  $\text{CD}_2\text{Cl}_2$ , 298 K) of compound **11c-Cr**.

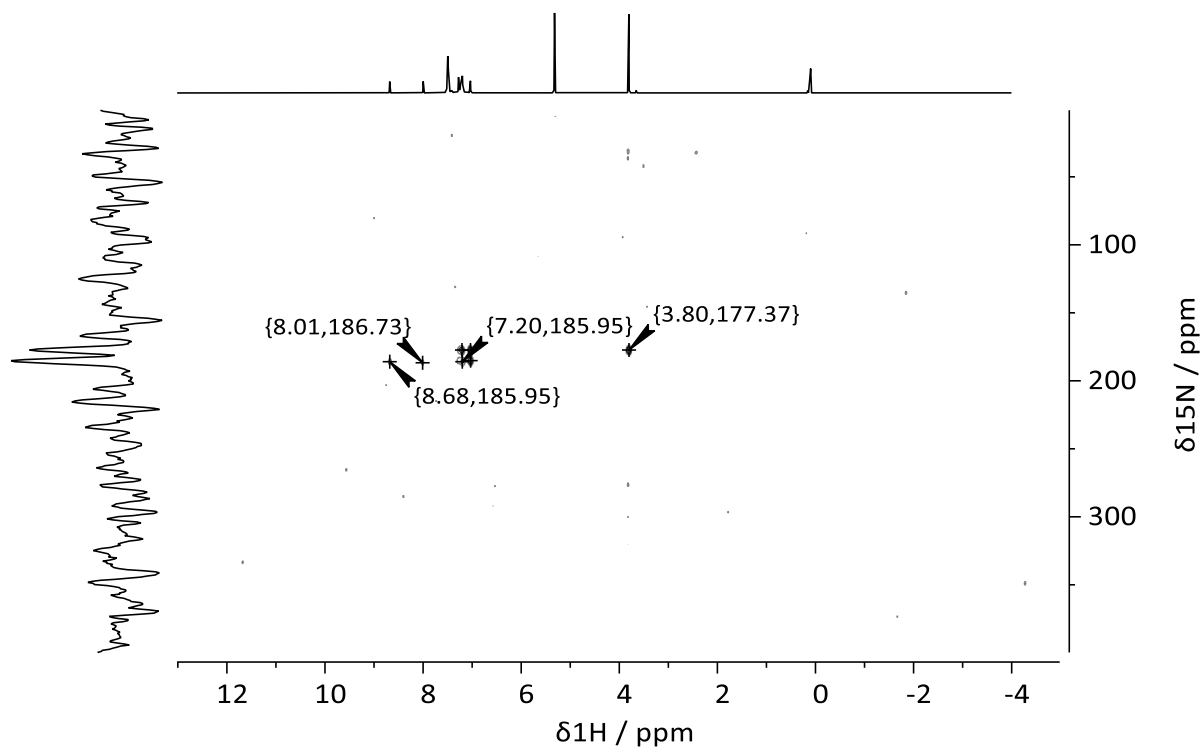

**Fig. S81**  $^1\text{H}$ ,  $^{15}\text{N}$  HMBC NMR spectrum (500.04 MHz, 50.68 MHz,  $\text{CD}_2\text{Cl}_2$ , 298 K) of compound **11c-Cr**.

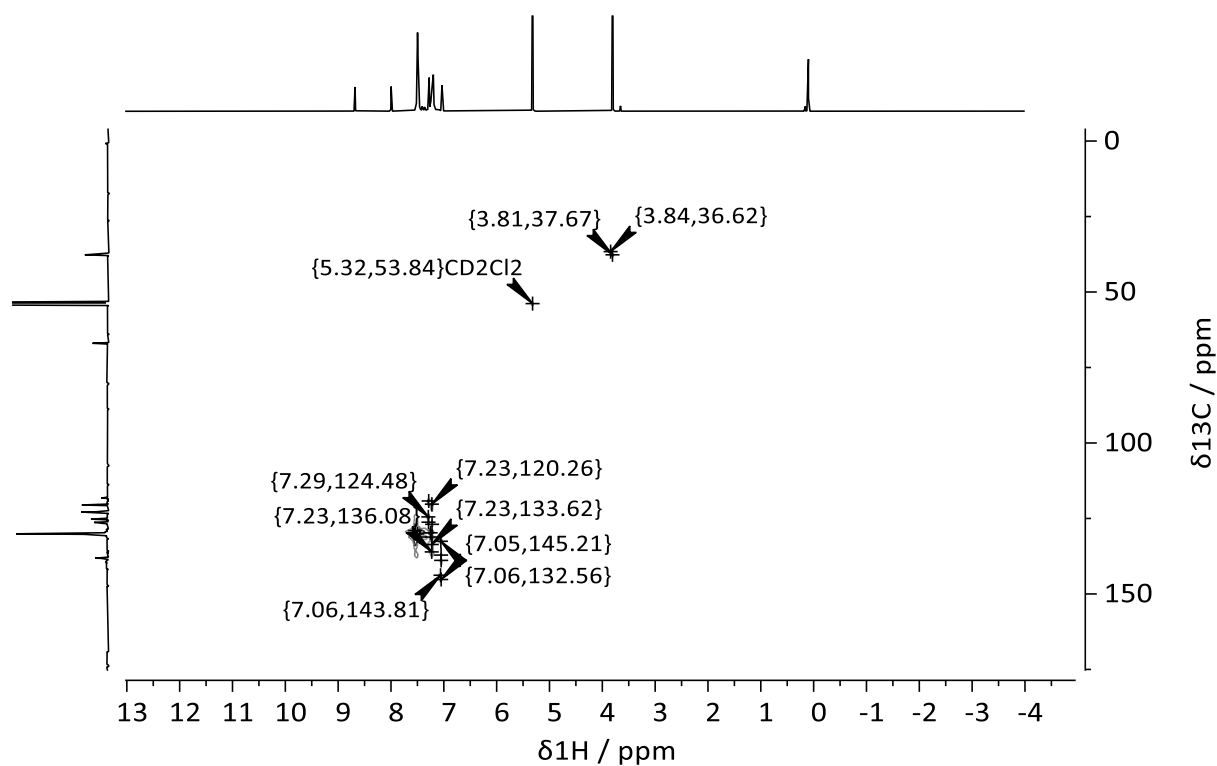

**Fig. S82**  $^1\text{H}$ ,  $^{13}\text{C}$  HSQC NMR spectrum (500.04 MHz, 125.75 MHz,  $\text{CD}_2\text{Cl}_2$ , 298 K) of compound **11c-Cr**.

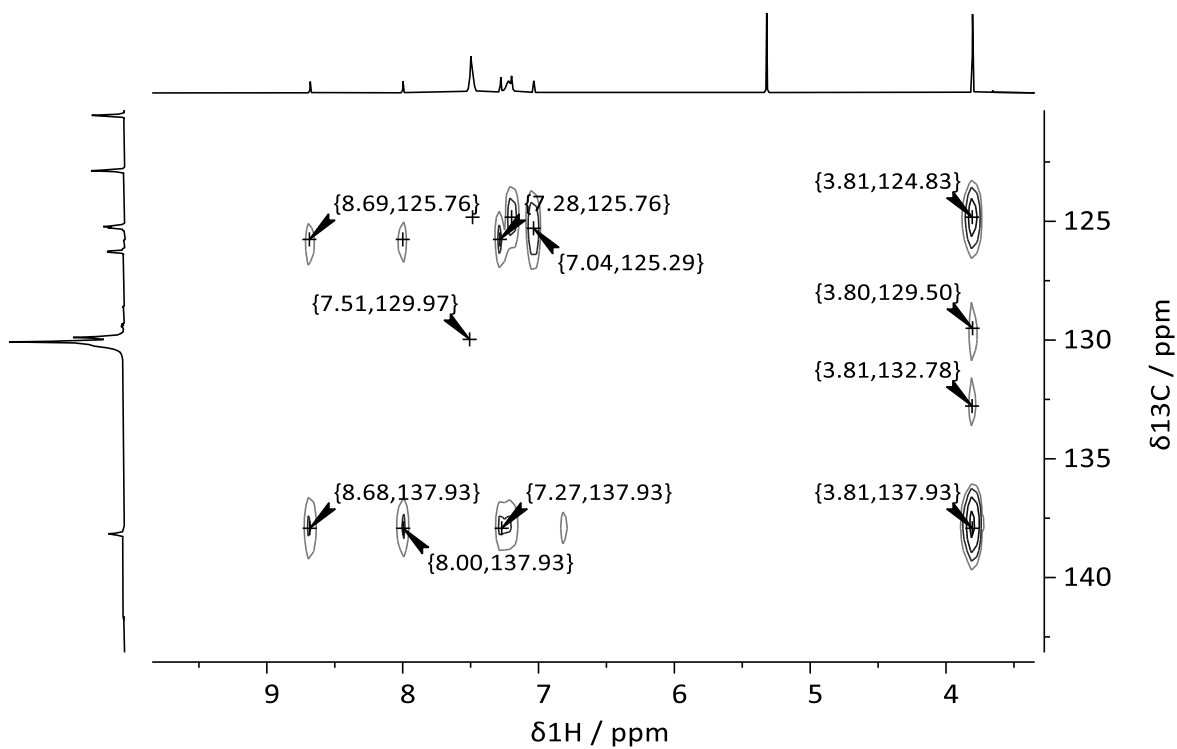

**Fig. S83**  $^1\text{H}$ ,  $^{13}\text{C}$  HMBC NMR spectrum (500.04 MHz, 125.75 MHz,  $\text{CD}_2\text{Cl}_2$ , 298 K) of compound **11c-Cr**.

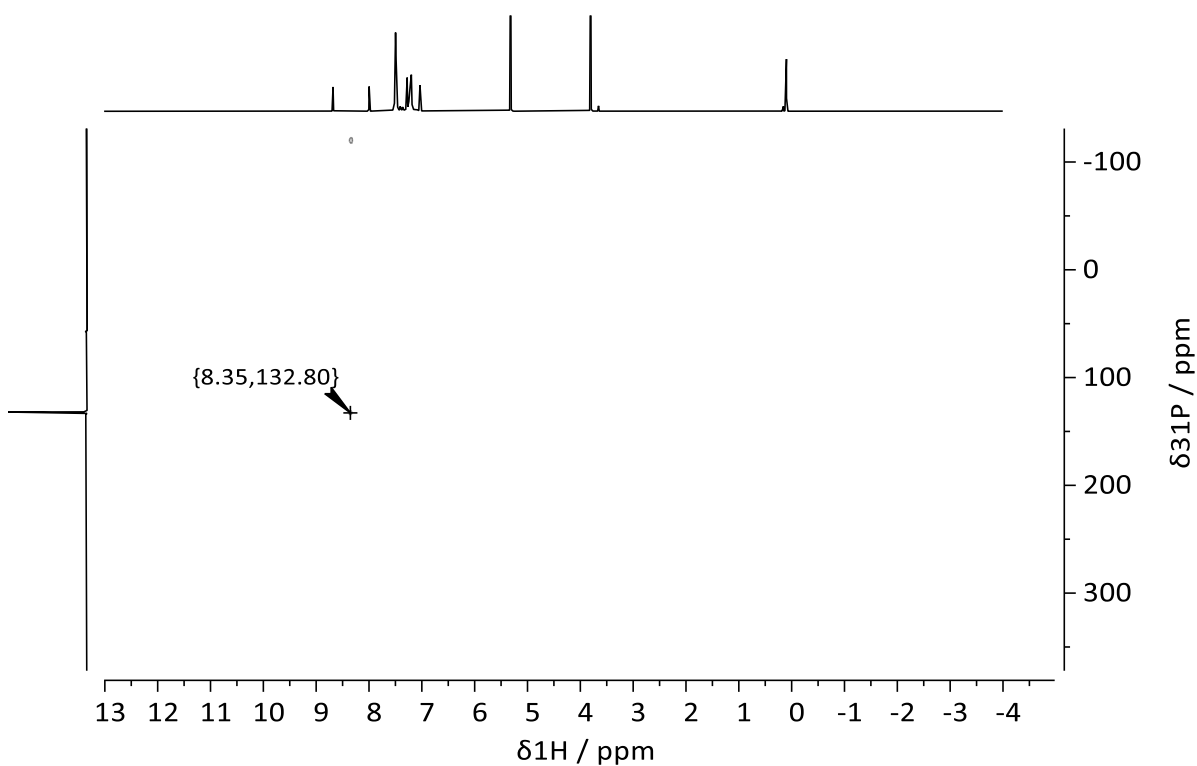

**Fig. S84**  $^1\text{H}$ ,  $^{31}\text{P}$  HMQC NMR spectrum (500.04 MHz, 202.44 MHz,  $\text{CD}_2\text{Cl}_2$ , 298 K) of compound **11c-Cr**.



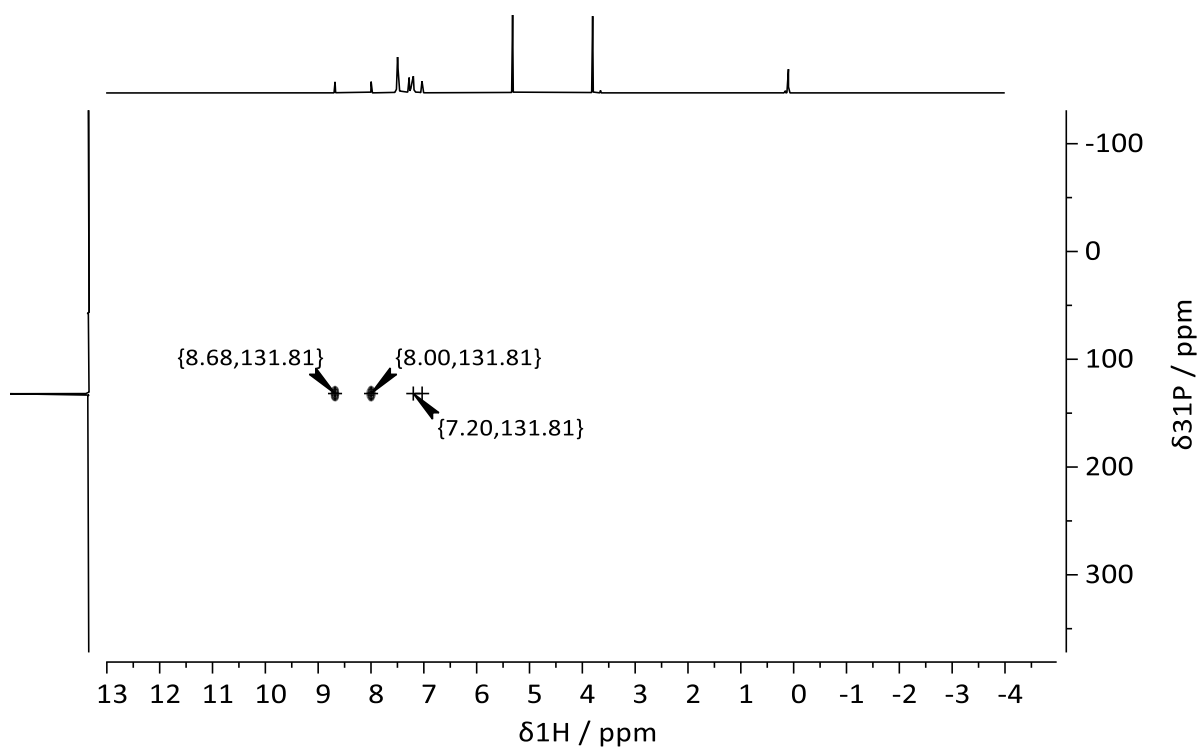

Fig. S85  $^1\text{H}$ ,  $^{31}\text{P}$  HMBC NMR spectrum (500.04 MHz, 202.44 MHz,  $\text{CD}_2\text{Cl}_2$ , 298 K) of compound **11c-Cr**.

### Compound 12

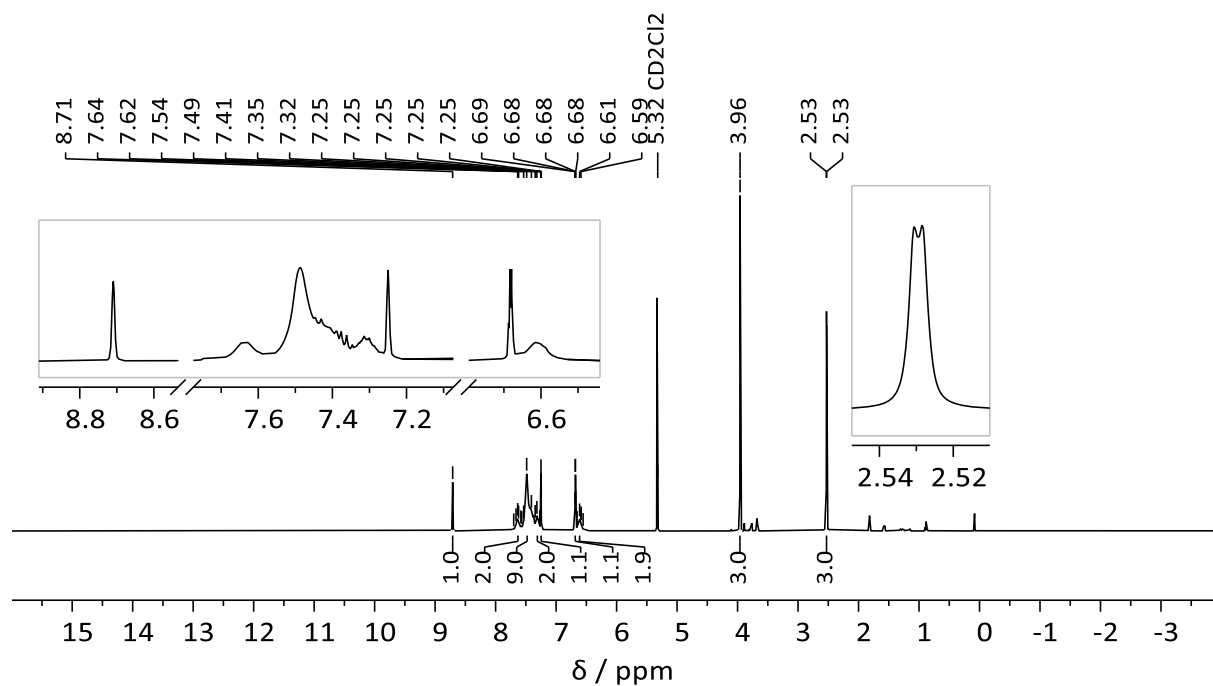

Fig. S86  $^1\text{H}$  NMR spectrum (500.04 MHz,  $\text{CD}_2\text{Cl}_2$ , 298 K) of compound **12**.

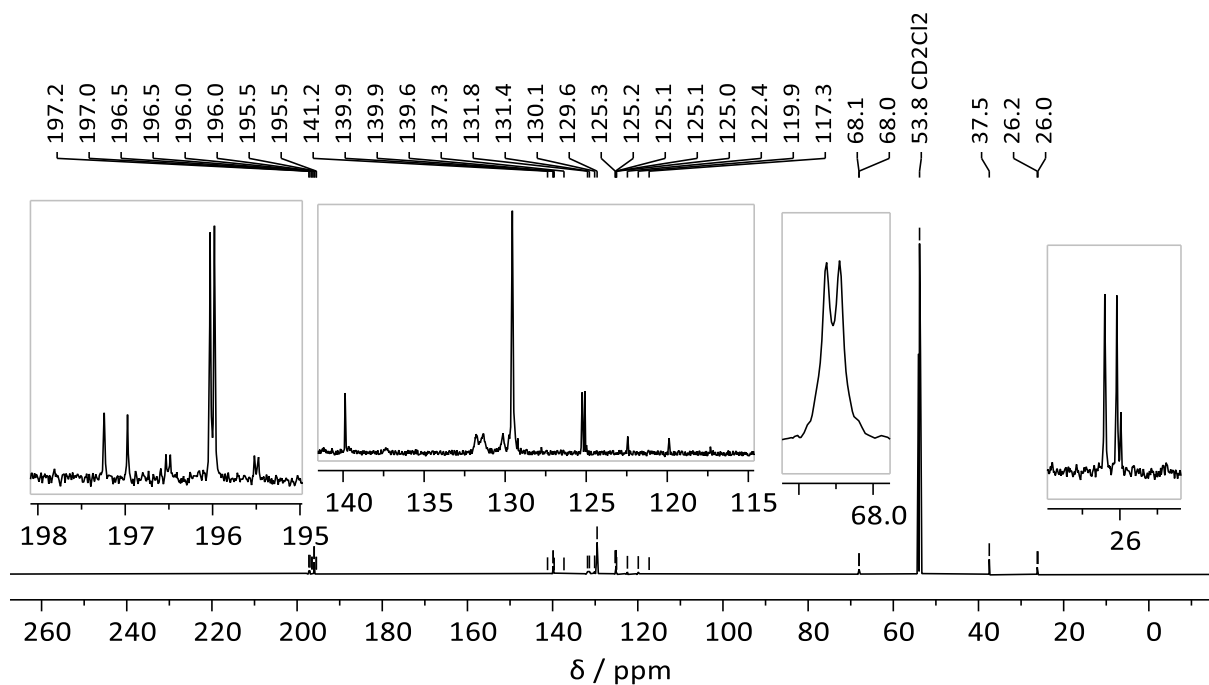

**Fig. S87**  $^{13}\text{C}\{^1\text{H}\}$  NMR spectrum (125.75 MHz,  $\text{CD}_2\text{Cl}_2$ , 298 K) of compound **12**.

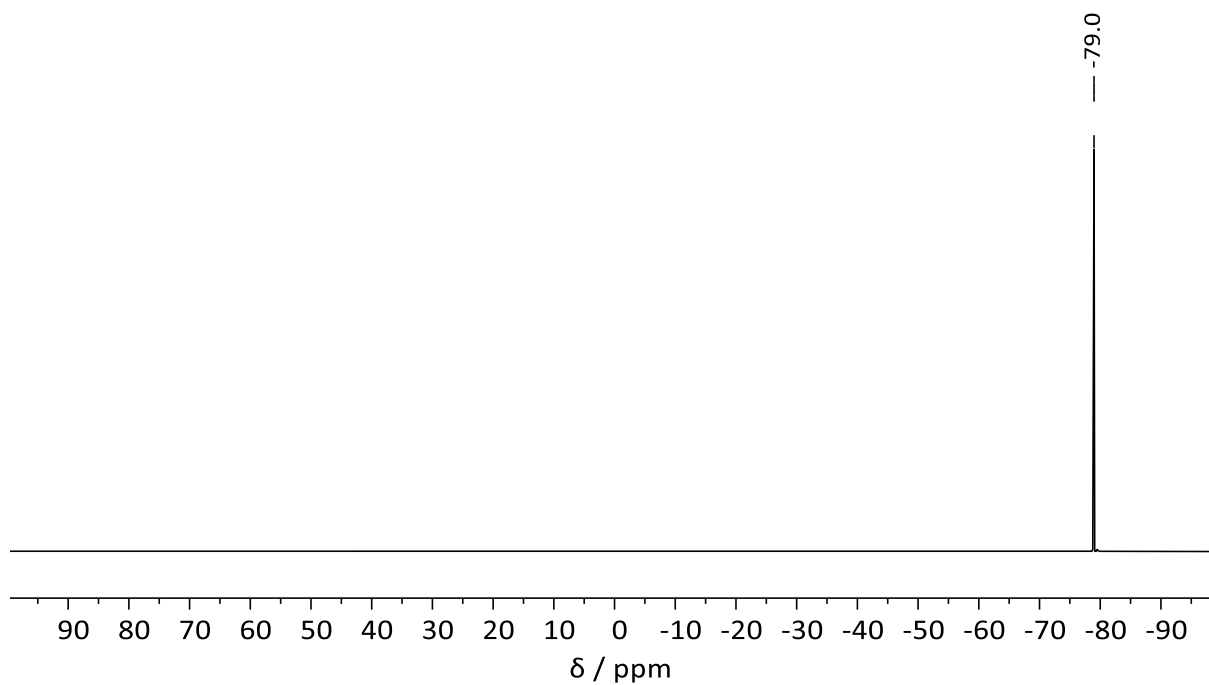

**Fig. S88**  $^{19}\text{F}$  NMR spectrum (470.51 MHz,  $\text{CD}_2\text{Cl}_2$ , 298 K) of compound **12**.

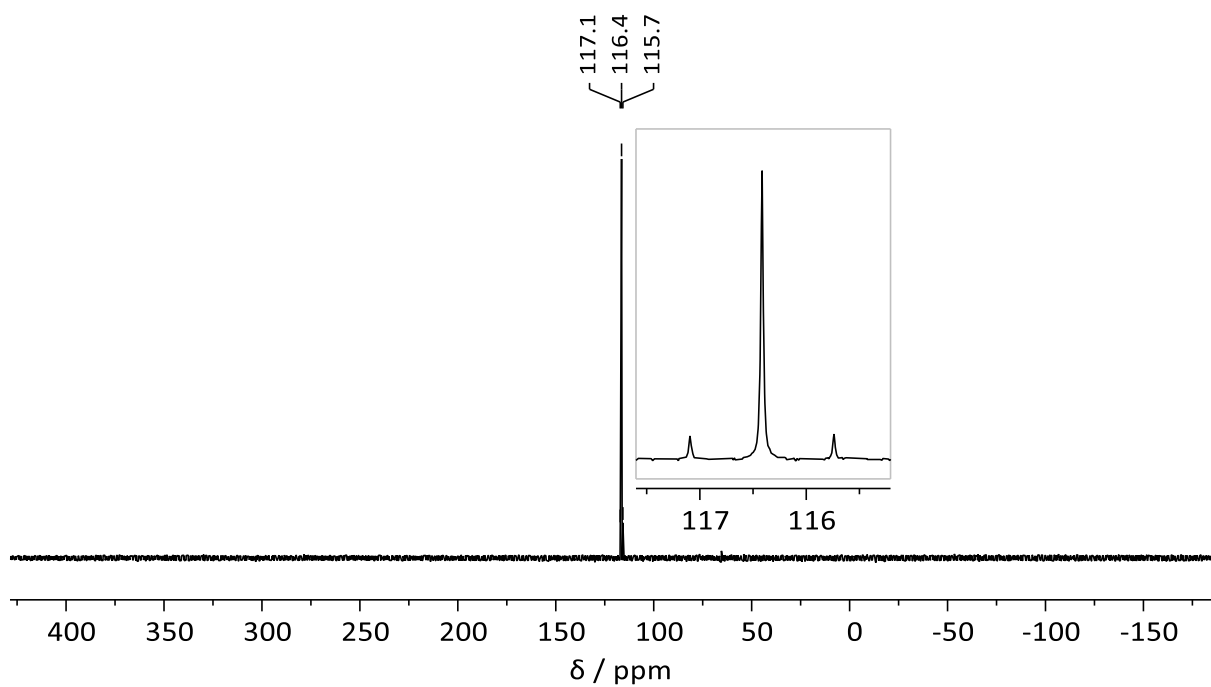

**Fig. S89**  $^{31}\text{P}\{^1\text{H}\}$  NMR spectrum (202.44 MHz,  $\text{CD}_2\text{Cl}_2$ , 298 K) of compound 12.

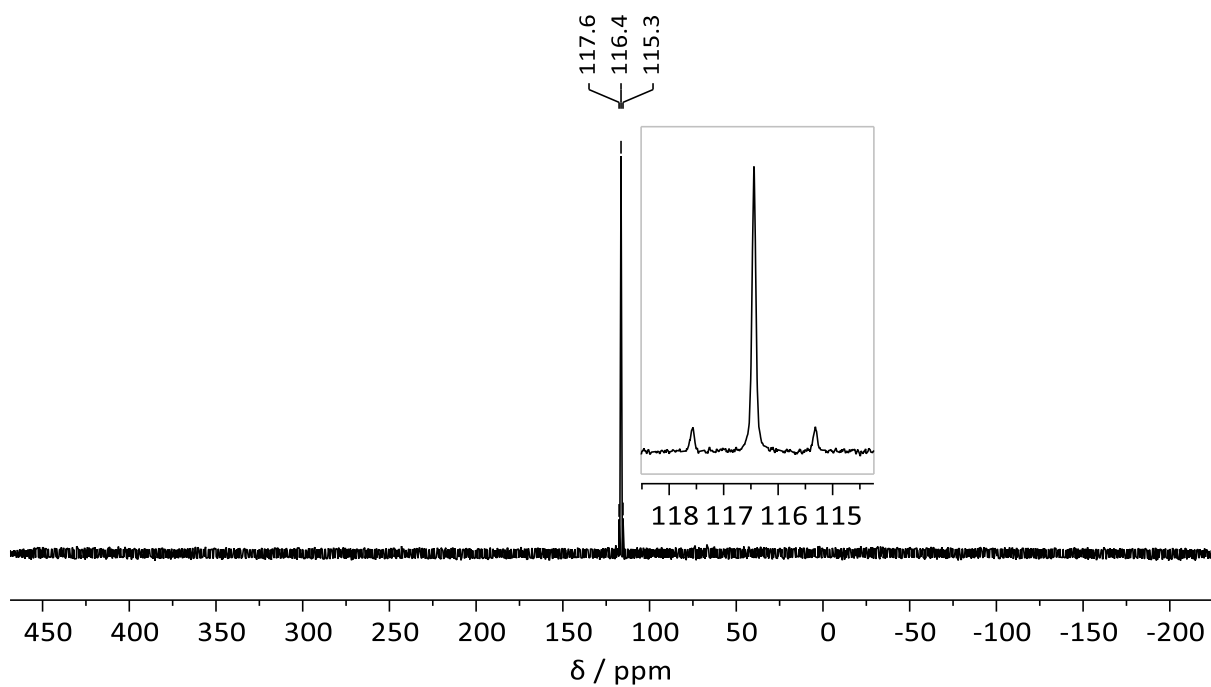

**Fig. S90**  $^{31}\text{P}$  NMR spectrum (121.51 MHz,  $\text{CD}_2\text{Cl}_2$ , 299 K) of compound 12.

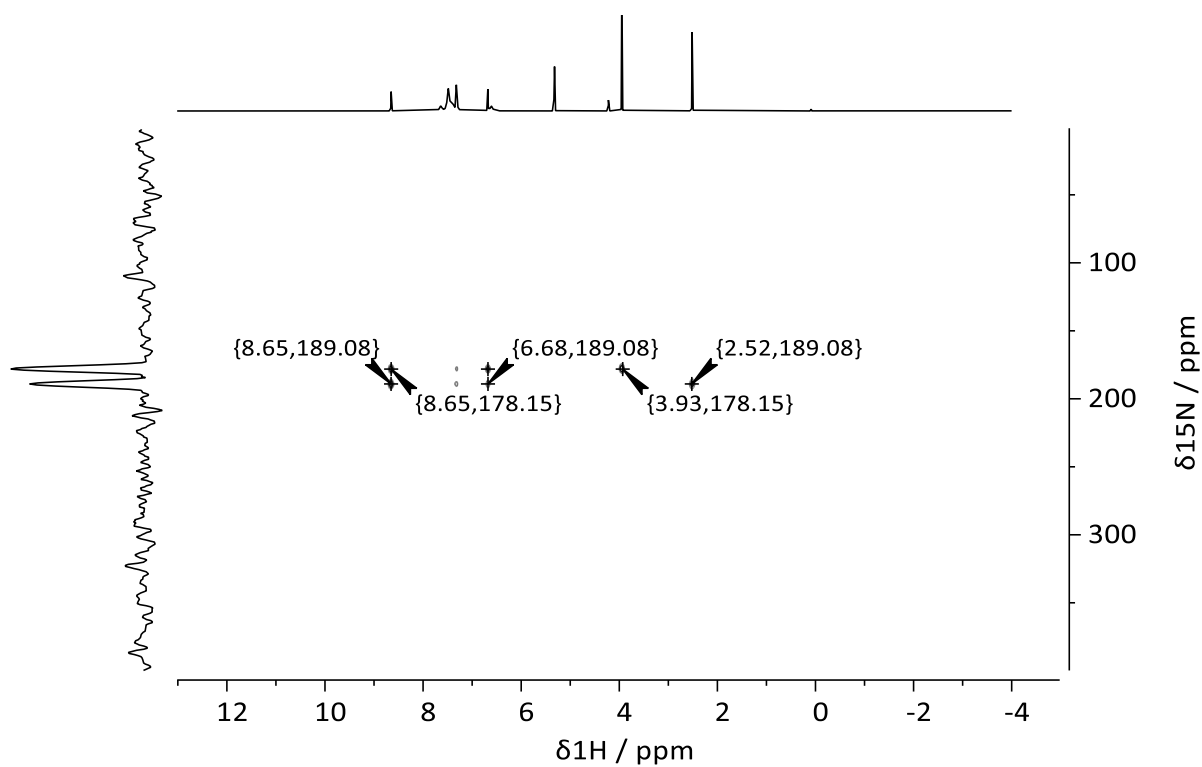

**Fig. S91**  $^1\text{H}$ ,  $^{15}\text{N}$  HMBC NMR spectrum (500.04 MHz, 50.68 MHz,  $\text{CD}_2\text{Cl}_2$ , 298 K) of compound **12**.

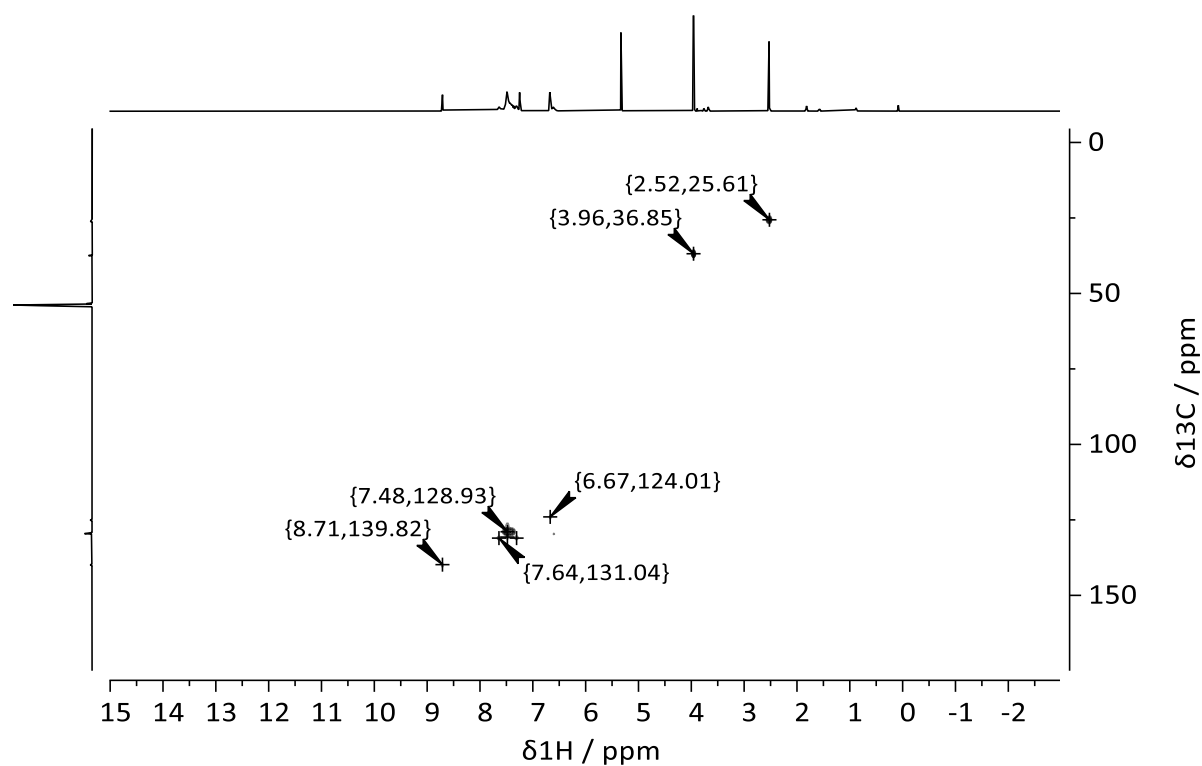

**Fig. S92**  $^1\text{H}$ ,  $^{13}\text{C}$  HSQC NMR spectrum (500.04 MHz, 125.75 MHz,  $\text{CD}_2\text{Cl}_2$ , 298 K) of compound **12**.

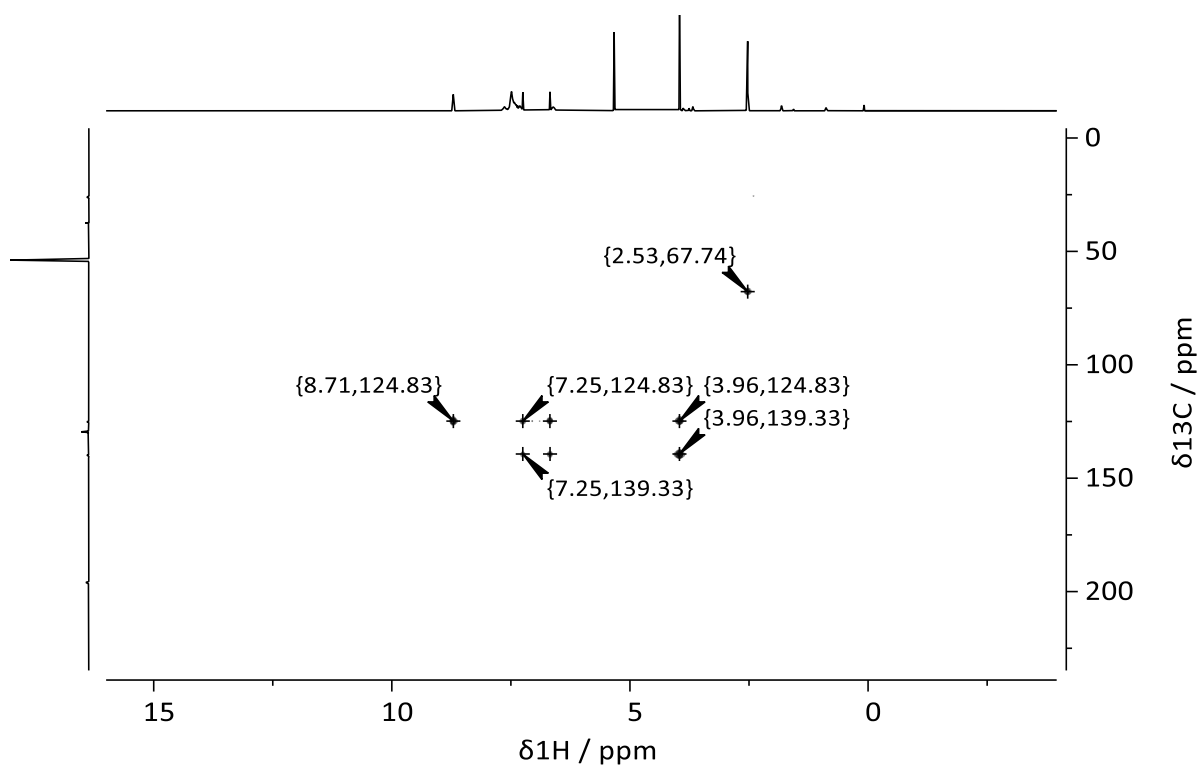

**Fig. S93**  $^1\text{H}$ ,  $^{13}\text{C}$  HMBC NMR spectrum (500.04 MHz, 125.75 MHz,  $\text{CD}_2\text{Cl}_2$ , 298 K) of compound **12**.

**Compound 12-Cr**

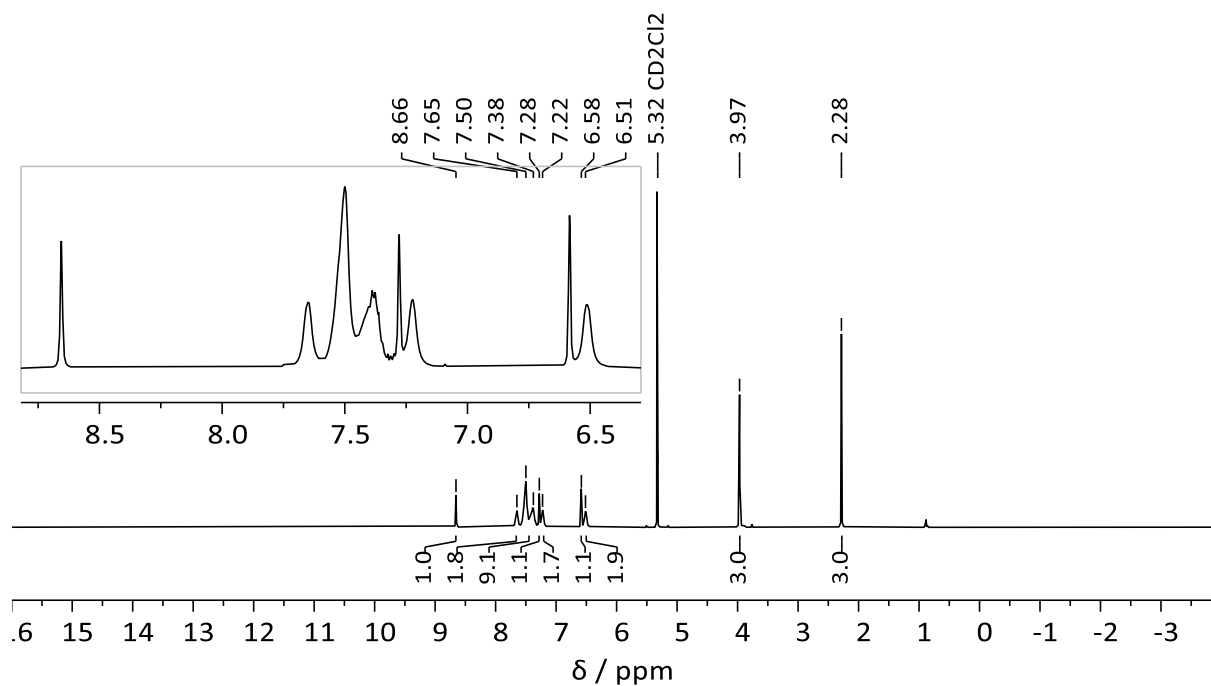

**Fig. S94**  $^1\text{H}$  NMR spectrum (500.04 MHz,  $\text{CD}_2\text{Cl}_2$ , 298 K) of compound **12-Cr**.

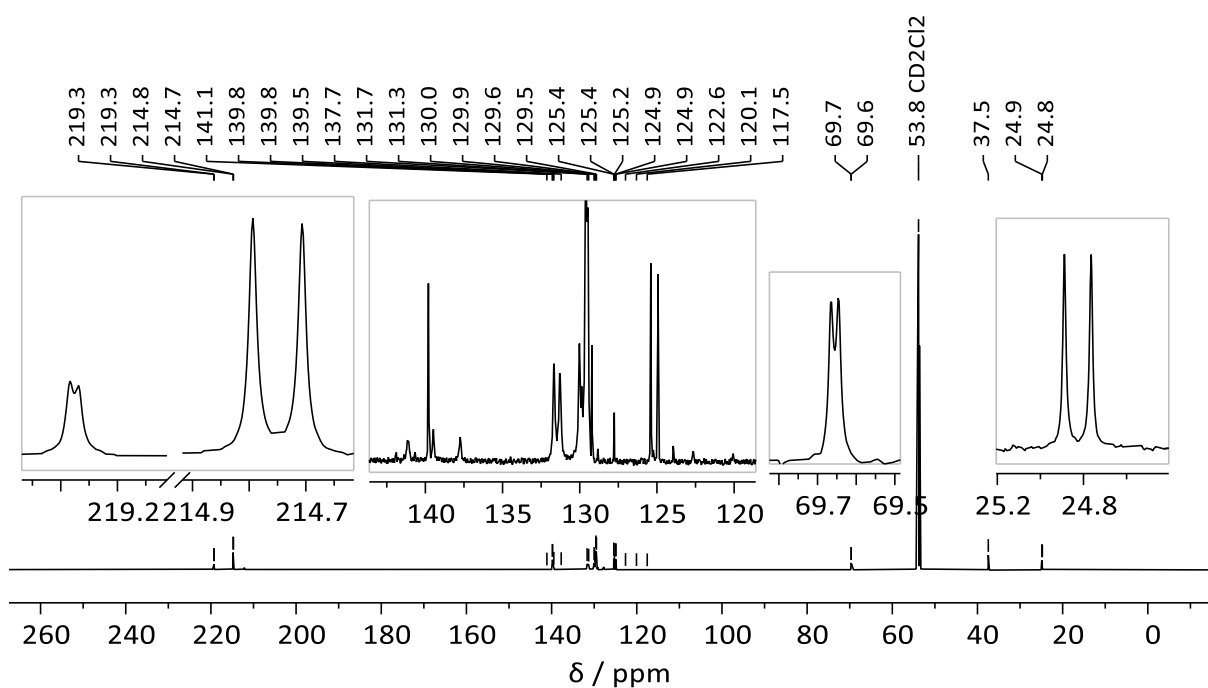

**Fig. S95**  $^{13}\text{C}\{^1\text{H}\}$  NMR spectrum (125.75 MHz,  $\text{CD}_2\text{Cl}_2$ , 298 K) of compound **12-Cr**.

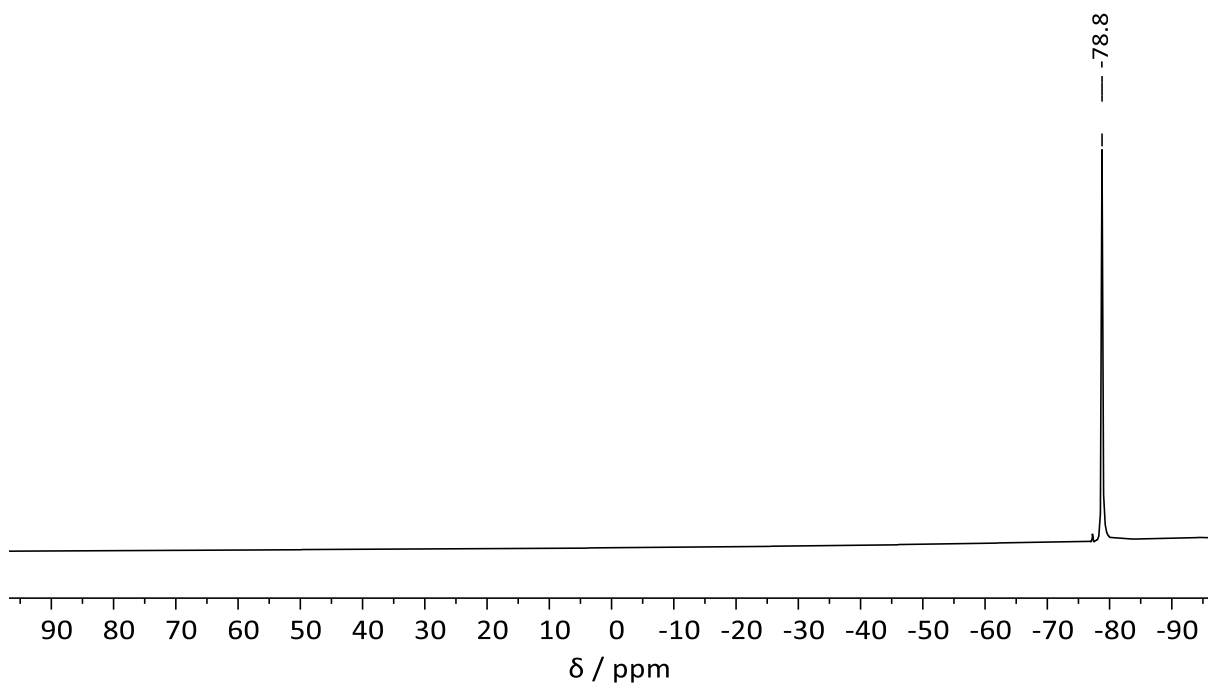

**Fig. S96**  $^{19}\text{F}$  NMR spectrum (470.51 MHz,  $\text{CD}_2\text{Cl}_2$ , 298 K) of compound **12-Cr**.

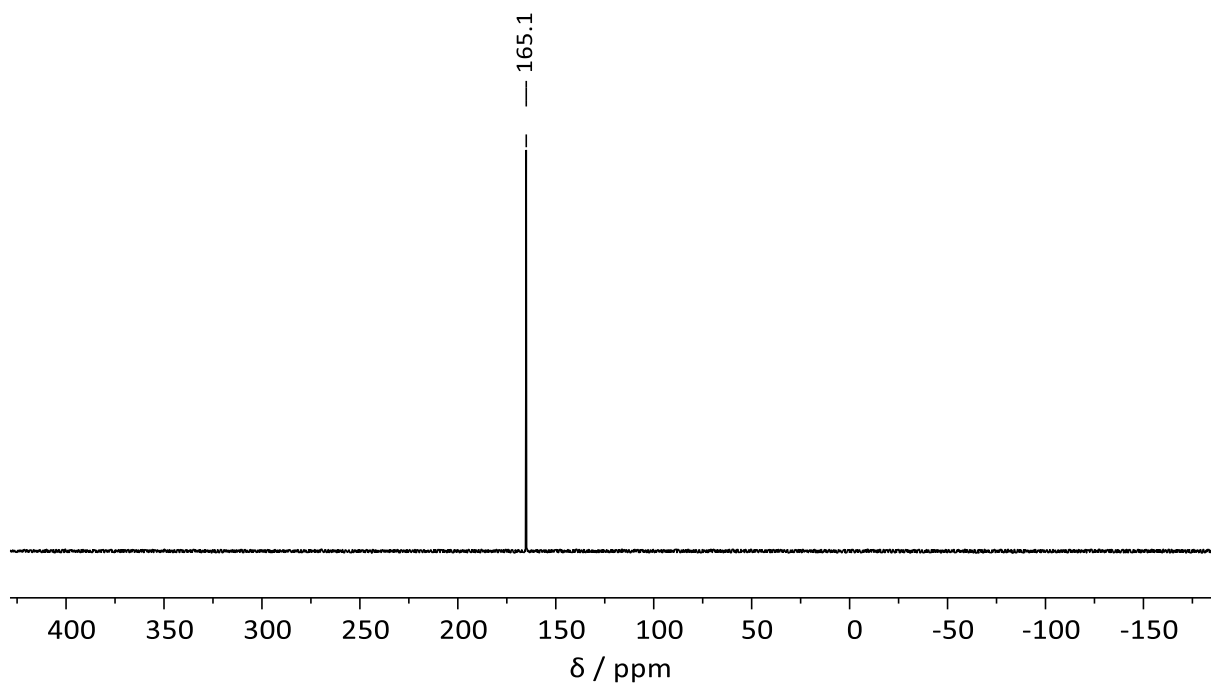

**Fig. S97**  $^{31}\text{P}\{^1\text{H}\}$  NMR spectrum (202.44 MHz,  $\text{CD}_2\text{Cl}_2$ , 298 K) of compound **12-Cr**.

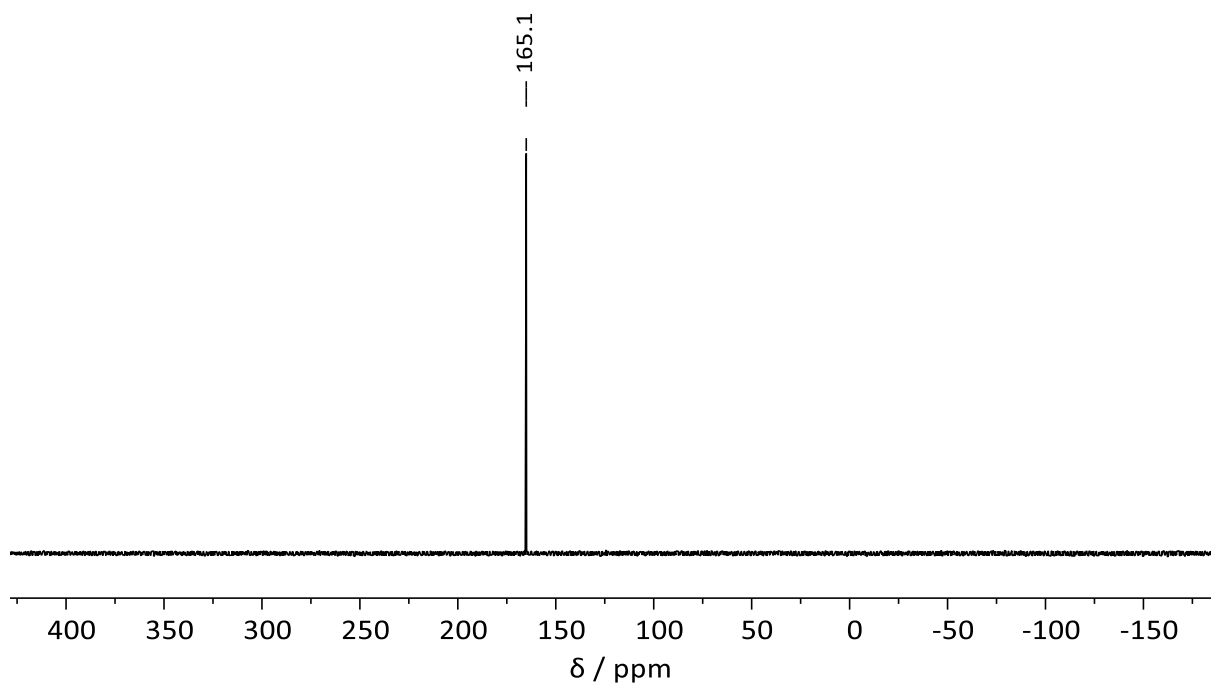

**Fig. S98**  $^{31}\text{P}$  NMR spectrum (202.44 MHz,  $\text{CD}_2\text{Cl}_2$ , 298 K) of compound **12-Cr**.

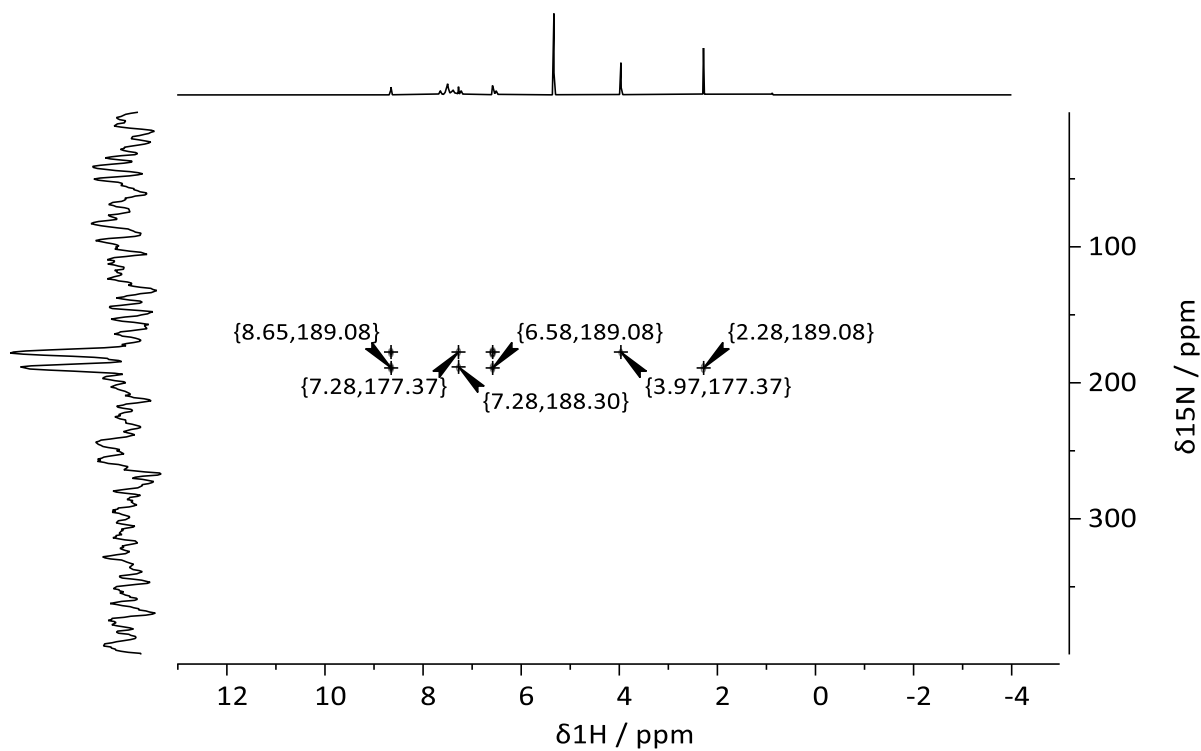

**Fig. S99**  $^1\text{H}$ ,  $^{15}\text{N}$  HMBC NMR spectrum (500.04 MHz, 50.68 MHz,  $\text{CD}_2\text{Cl}_2$ , 298 K) of compound **12-Cr**.

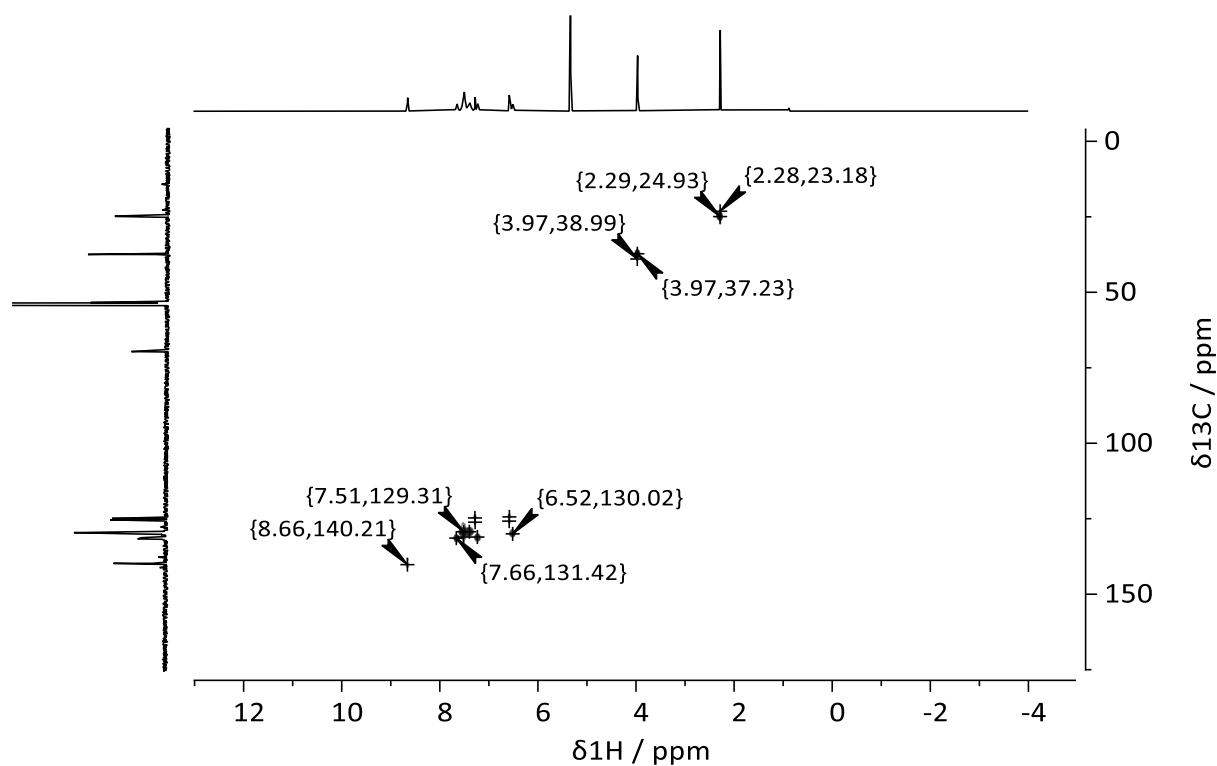

**Fig. S100**  $^1\text{H}$ ,  $^{13}\text{C}$  HSQC NMR spectrum (500.04 MHz, 125.75 MHz,  $\text{CD}_2\text{Cl}_2$ , 298 K) of compound **12-Cr**.



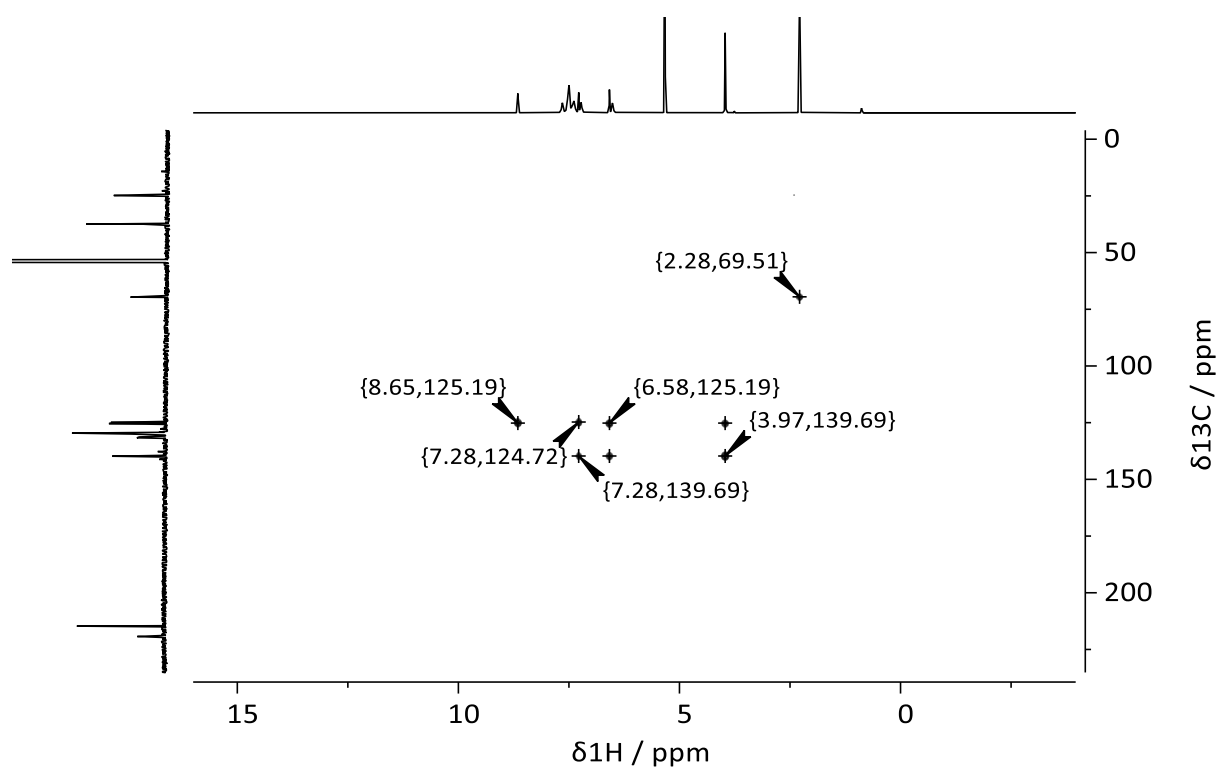

**Fig. S101**  $^1\text{H}$ ,  $^{13}\text{C}$  HMBC NMR spectrum (500.04 MHz, 125.75 MHz,  $\text{CD}_2\text{Cl}_2$ , 298 K) of compound **12-Cr**.

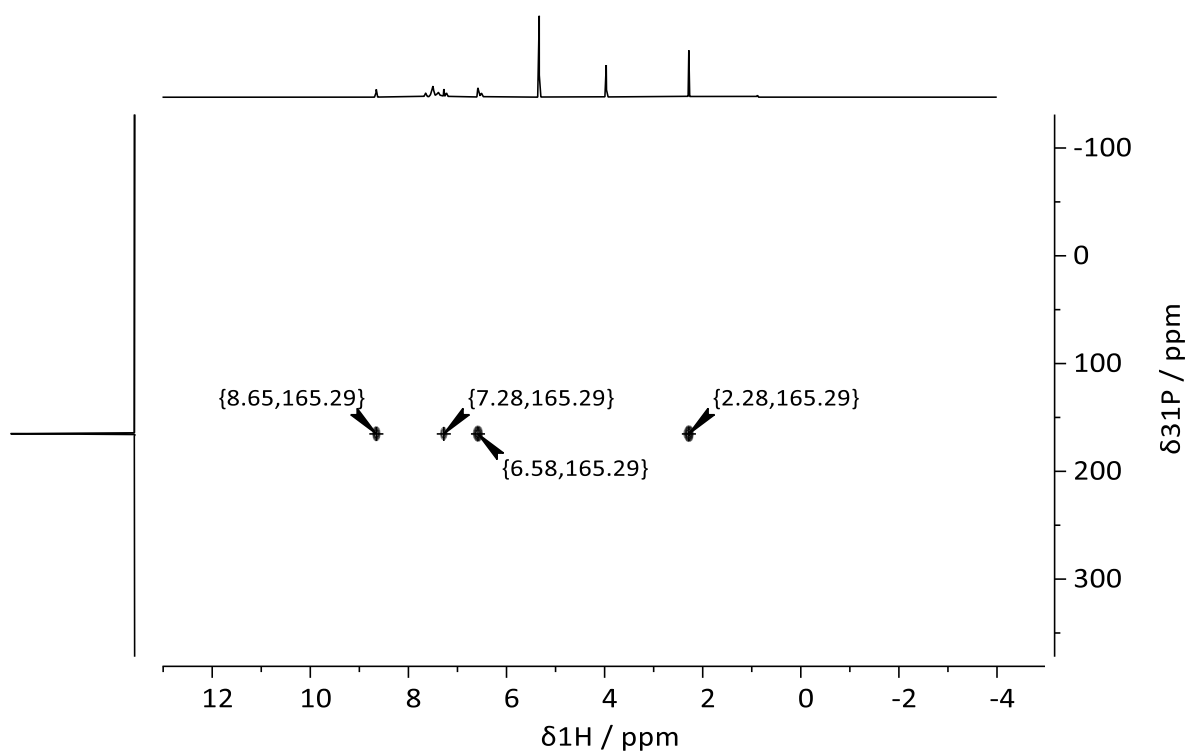

**Fig. S102**  $^1\text{H}$ ,  $^{31}\text{P}$  HMBC NMR spectrum (500.04 MHz, 202.44 MHz,  $\text{CD}_2\text{Cl}_2$ , 298 K) of compound **12-Cr**.

## 4 X-ray diffraction studies

### Compound 2

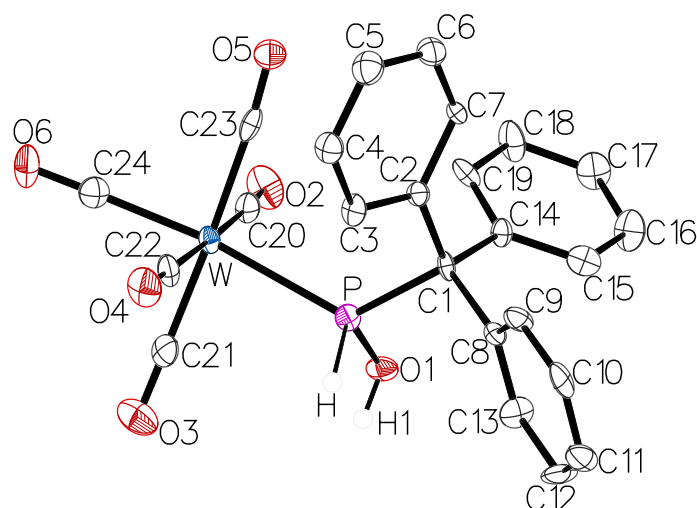

**Fig. S103** Molecular structures of **2** in the single crystal lattice at 100(2) K. Thermal ellipsoids are set at 50% probability level. Hydrogen atoms and solvent molecules were omitted for clarity except for those bound to phosphorus and oxygen atoms. Suitable single crystals were obtained as clear colourless blocks by slow evaporation of a solution of 95 mg of **2** in 30 mL of a 1:1 *n*-pentane/diethyl ether mixture at 5 °C. CCDC-2302946.

**Table S1** Crystal data and structure refinements for **2**.

|                                          |                                                                                        |
|------------------------------------------|----------------------------------------------------------------------------------------|
| Identification code                      | GSTR738, DB-403 // GXraymo_6721_0m_4                                                   |
| Crystal habitus                          | clear colourless block                                                                 |
| Device type                              | Bruker D8 Venture                                                                      |
| Empirical formula                        | C <sub>52</sub> H <sub>42</sub> O <sub>13</sub> P <sub>2</sub> W <sub>2</sub>          |
| Moiety formula                           | 2 (C <sub>24</sub> H <sub>17</sub> O <sub>6</sub> PW), C <sub>4</sub> H <sub>8</sub> O |
| Formula weight / g/mol                   | 1304.49                                                                                |
| <i>T</i> / K                             | 100.0                                                                                  |
| Crystal system                           | triclinic                                                                              |
| Space group                              | <i>P</i> $\bar{1}$                                                                     |
| <i>a</i> / Å                             | 9.3995(9)                                                                              |
| <i>b</i> / Å                             | 11.6790(10)                                                                            |
| <i>c</i> / Å                             | 12.0501(11)                                                                            |
| $\alpha$ / °                             | 97.985(3)                                                                              |
| $\beta$ / °                              | 91.166(4)                                                                              |
| $\gamma$ / °                             | 109.171(3)                                                                             |
| <i>V</i> / Å <sup>3</sup>                | 1234.3(2)                                                                              |
| <i>Z</i>                                 | 1                                                                                      |
| $\rho_{\text{calc}}$ / g/cm <sup>3</sup> | 1.755                                                                                  |
| $\mu$ / mm <sup>-1</sup>                 | 4.786                                                                                  |
| <i>F</i> (000)                           | 636.0                                                                                  |
| Crystal size / mm <sup>3</sup>           | 0.4 × 0.24 × 0.2                                                                       |
| Absorption correction                    | empirical                                                                              |
| Min. and max. transmission               | 0.588614 and 0.745472                                                                  |

|                                                |                                                            |
|------------------------------------------------|------------------------------------------------------------|
| Radiation                                      | Mo-K $\alpha$ ( $\lambda = 0.71073$ Å)                     |
| 2 $\theta$ range for data collection / °       | 3.736 to 52                                                |
| Completeness to $\theta$                       | 0.969                                                      |
| Index ranges                                   | $-11 \leq h \leq 11, -14 \leq k \leq 14, 0 \leq l \leq 14$ |
| Reflections collected                          | 4891                                                       |
| Independent reflections                        | 4891 ( $R_\sigma = 0.0860$ )                               |
| Data / restraints / parameters                 | 4891 / 117 / 342                                           |
| Goodness-of-fit on $F^2$                       | 1.110                                                      |
| Final $R$ indexes ( $I \geq 2\sigma(I)$ )      | $R_1 = 0.0565, \omega R_2 = 0.1230$                        |
| Final $R$ indexes (all data)                   | $R_1 = 0.0745, \omega R_2 = 0.1317$                        |
| Largest diff. peak and hole / e/Å <sup>3</sup> | 2.06 and -2.81                                             |

**Table S2** Bond lengths for **2**.

| Atom | Atom | Length / Å | Atom | Atom | Length / Å |
|------|------|------------|------|------|------------|
| W    | P    | 2.527(3)   | C5   | C6   | 1.390(16)  |
| W    | C20  | 2.053(12)  | C6   | C7   | 1.385(15)  |
| W    | C21  | 1.986(12)  | C8   | C9   | 1.401(14)  |
| W    | C22  | 2.032(11)  | C8   | C13  | 1.383(15)  |
| W    | C23  | 2.017(12)  | C9   | C10  | 1.393(15)  |
| W    | C24  | 1.991(11)  | C10  | C11  | 1.371(17)  |
| P    | O1   | 1.575(8)   | C11  | C12  | 1.404(16)  |
| P    | C1   | 1.919(10)  | C12  | C13  | 1.395(15)  |
| O2   | C20  | 1.135(13)  | C14  | C15  | 1.386(15)  |
| O3   | C21  | 1.184(14)  | C14  | C19  | 1.394(15)  |
| O4   | C22  | 1.154(13)  | C15  | C16  | 1.390(16)  |
| O5   | C23  | 1.172(13)  | C16  | C17  | 1.387(17)  |
| O6   | C24  | 1.150(13)  | C17  | C18  | 1.378(17)  |
| C1   | C2   | 1.521(14)  | C18  | C19  | 1.398(15)  |
| C1   | C8   | 1.538(14)  | O7   | C25  | 1.361(13)  |
| C1   | C14  | 1.565(14)  | O7   | C28  | 1.396(14)  |
| C2   | C3   | 1.405(13)  | C25  | C26  | 1.465(13)  |
| C2   | C7   | 1.410(14)  | C26  | C27  | 1.474(13)  |
| C3   | C4   | 1.366(15)  | C27  | C28  | 1.458(13)  |
| C4   | C5   | 1.391(16)  |      |      |            |

**Table S3** Bond angles for **2**.

| Atom | Atom | Atom | Angle / ° | Atom | Atom | Atom | Angle / ° |
|------|------|------|-----------|------|------|------|-----------|
| C20  | W    | P    | 91.5(3)   | C6   | C5   | C4   | 117.8(11) |
| C21  | W    | P    | 86.3(3)   | C7   | C6   | C5   | 121.6(11) |
| C21  | W    | C20  | 90.7(4)   | C6   | C7   | C2   | 119.8(10) |
| C21  | W    | C22  | 89.2(4)   | C9   | C8   | C1   | 120.9(9)  |
| C21  | W    | C23  | 177.3(5)  | C13  | C8   | C1   | 122.5(9)  |
| C21  | W    | C24  | 87.0(5)   | C13  | C8   | C9   | 116.6(10) |
| C22  | W    | P    | 90.1(3)   | C10  | C9   | C8   | 122.2(11) |
| C22  | W    | C20  | 178.4(4)  | C11  | C10  | C9   | 120.5(10) |
| C23  | W    | P    | 96.0(3)   | C10  | C11  | C12  | 118.5(10) |
| C23  | W    | C20  | 88.0(4)   | C13  | C12  | C11  | 120.4(11) |
| C23  | W    | C22  | 92.1(4)   | C8   | C13  | C12  | 121.8(10) |
| C24  | W    | P    | 173.1(3)  | C15  | C14  | C1   | 122.6(9)  |
| C24  | W    | C20  | 90.1(4)   | C15  | C14  | C19  | 118.1(10) |
| C24  | W    | C22  | 88.4(4)   | C19  | C14  | C1   | 119.3(9)  |
| C24  | W    | C23  | 90.7(4)   | C14  | C15  | C16  | 120.6(11) |
| O1   | P    | W    | 113.8(3)  | C17  | C16  | C15  | 120.2(11) |
| O1   | P    | C1   | 105.8(4)  | C18  | C17  | C16  | 120.6(11) |
| C1   | P    | W    | 124.1(3)  | C17  | C18  | C19  | 118.4(11) |
| C2   | C1   | P    | 109.2(6)  | C14  | C19  | C18  | 122.1(11) |
| C2   | C1   | C8   | 110.2(8)  | O2   | C20  | W    | 176.6(10) |
| C2   | C1   | C14  | 111.9(9)  | O3   | C21  | W    | 178.6(9)  |
| C8   | C1   | P    | 109.0(7)  | O4   | C22  | W    | 179.3(9)  |
| C8   | C1   | C14  | 111.0(8)  | O5   | C23  | W    | 174.4(8)  |
| C14  | C1   | P    | 105.3(6)  | O6   | C24  | W    | 178.9(11) |
| C3   | C2   | C1   | 118.8(9)  | C25  | O7   | C28  | 109.0(13) |
| C3   | C2   | C7   | 118.3(10) | O7   | C25  | C26  | 112.0(11) |
| C7   | C2   | C1   | 122.8(9)  | C25  | C26  | C27  | 103.0(10) |
| C4   | C3   | C2   | 120.5(10) | C28  | C27  | C26  | 107.6(10) |
| C3   | C4   | C5   | 122.0(10) | O7   | C28  | C27  | 108.3(12) |

**Table S4** Torsion angles for **2**.

| A  | B   | C   | D   | Angle / °  | A   | B   | C   | D   | Angle / ° |
|----|-----|-----|-----|------------|-----|-----|-----|-----|-----------|
| P  | C1  | C2  | C3  | 50.3(11)   | C8  | C1  | C14 | C15 | -1.7(14)  |
| P  | C1  | C2  | C7  | -133.5(9)  | C8  | C1  | C14 | C19 | 177.2(9)  |
| P  | C1  | C8  | C9  | -129.0(9)  | C8  | C9  | C10 | C11 | -1.5(17)  |
| P  | C1  | C8  | C13 | 49.9(12)   | C9  | C8  | C13 | C12 | 0.2(17)   |
| P  | C1  | C14 | C15 | -119.6(10) | C9  | C10 | C11 | C12 | 1.8(17)   |
| P  | C1  | C14 | C19 | 59.3(11)   | C10 | C11 | C12 | C13 | -1.1(18)  |
| C1 | C2  | C3  | C4  | 177.2(9)   | C11 | C12 | C13 | C8  | 0.1(18)   |
| C1 | C2  | C7  | C6  | -176.0(9)  | C13 | C8  | C9  | C10 | 0.5(16)   |
| C1 | C8  | C9  | C10 | 179.4(9)   | C14 | C1  | C2  | C3  | 166.5(9)  |
| C1 | C8  | C13 | C12 | -178.7(10) | C14 | C1  | C2  | C7  | -17.3(13) |
| C1 | C14 | C15 | C16 | 178.8(10)  | C14 | C1  | C8  | C9  | 115.4(11) |
| C1 | C14 | C19 | C18 | -179.7(10) | C14 | C1  | C8  | C13 | -65.8(13) |
| C2 | C1  | C8  | C9  | -9.1(13)   | C14 | C15 | C16 | C17 | 0.7(18)   |
| C2 | C1  | C8  | C13 | 169.7(10)  | C15 | C14 | C19 | C18 | -0.7(17)  |
| C2 | C1  | C14 | C15 | 121.9(11)  | C15 | C16 | C17 | C18 | 0(2)      |
| C2 | C1  | C14 | C19 | -59.2(12)  | C16 | C17 | C18 | C19 | -0.4(19)  |
| C2 | C3  | C4  | C5  | -2.2(17)   | C17 | C18 | C19 | C14 | 1.0(18)   |
| C3 | C2  | C7  | C6  | 0.2(15)    | C19 | C14 | C15 | C16 | -0.1(17)  |
| C3 | C4  | C5  | C6  | 2.4(17)    | O7  | C25 | C26 | C27 | 1(2)      |
| C4 | C5  | C6  | C7  | -1.3(17)   | C25 | O7  | C28 | C27 | 1(2)      |
| C5 | C6  | C7  | C2  | 0.0(16)    | C25 | C26 | C27 | C28 | -1(2)     |
| C7 | C2  | C3  | C4  | 0.8(15)    | C26 | C27 | C28 | O7  | 0(2)      |
| C8 | C1  | C2  | C3  | -69.5(11)  | C28 | O7  | C25 | C26 | -1(2)     |
| C8 | C1  | C2  | C7  | 106.8(11)  |     |     |     |     |           |

## Compound 10a

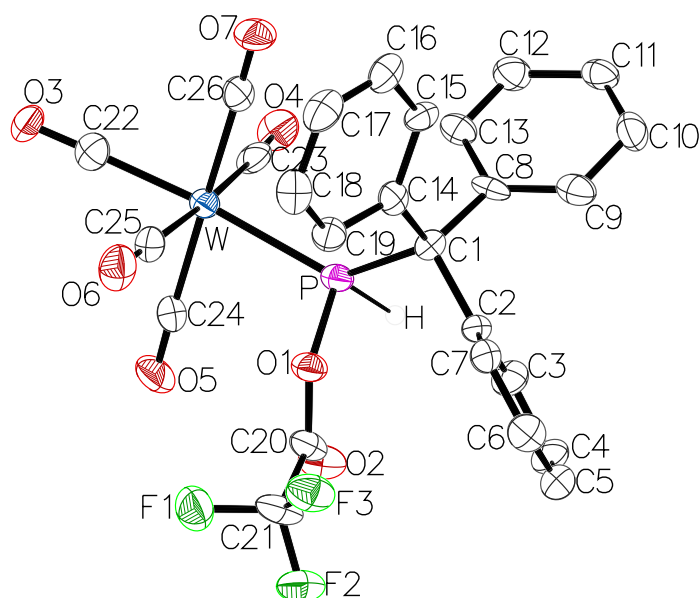

**Fig. S104** Molecular structures of **10a** in the single crystal lattice at 123(2) K. Thermal ellipsoids are set at 50% probability level. Hydrogen atoms were omitted for clarity except for those bound to phosphorus atoms. Suitable single crystals were obtained as clear colourless blocks by slow evaporation of a solution of 2.2 mg of **10a** in 0.2 mL of *n*-pentane at ambient temperature in a glovebox. CCDC-2302947.

**Table S5** Crystal data and structure refinements for **10a**.

|                                          |                                                                  |
|------------------------------------------|------------------------------------------------------------------|
| Identification code                      | GSTR777, DB-550 // GXray6912                                     |
| Crystal habitus                          | clear colourless block                                           |
| Device type                              | STOE IPDS2T                                                      |
| Empirical formula                        | C <sub>26</sub> H <sub>16</sub> F <sub>3</sub> O <sub>7</sub> PW |
| Moiety formula                           | C <sub>26</sub> H <sub>16</sub> F <sub>3</sub> O <sub>7</sub> PW |
| Formula weight / g/mol                   | 712.21                                                           |
| <i>T</i> / K                             | 123(2)                                                           |
| Crystal system                           | monoclinic                                                       |
| Space group                              | <i>P</i> 2 <sub>1</sub> / <i>c</i>                               |
| <i>a</i> / Å                             | 11.7247(3)                                                       |
| <i>b</i> / Å                             | 11.0478(4)                                                       |
| <i>c</i> / Å                             | 19.5690(5)                                                       |
| $\alpha$ / °                             | 90                                                               |
| $\beta$ / °                              | 95.179(2)                                                        |
| $\gamma$ / °                             | 90                                                               |
| <i>V</i> / Å <sup>3</sup>                | 2524.47(13)                                                      |
| <i>Z</i>                                 | 4                                                                |
| $\rho_{\text{calc}}$ / g/cm <sup>3</sup> | 1.874                                                            |
| $\mu$ / mm <sup>-1</sup>                 | 4.706                                                            |
| <i>F</i> (000)                           | 1376.0                                                           |
| Crystal size / mm <sup>3</sup>           | 0.12 × 0.11 × 0.08                                               |
| Absorption correction                    | multi-scan                                                       |
| Min. and max. transmission               | 0.0215 and 0.9140                                                |

|                                                |                                                                    |
|------------------------------------------------|--------------------------------------------------------------------|
| Radiation                                      | Mo-K $\alpha$ ( $\lambda = 0.71073$ Å)                             |
| 2 $\theta$ range for data collection / °       | 5.076 to 50.5                                                      |
| Completeness to $\theta$                       | 0.956                                                              |
| Index ranges                                   | $-13 \leq h \leq 14$ , $-13 \leq k \leq 13$ , $-23 \leq l \leq 23$ |
| Reflections collected                          | 18095                                                              |
| Independent reflections                        | 4366 ( $R_{int} = 0.1136$ , $R_{\sigma} = 0.0689$ )                |
| Data / restraints / parameters                 | 4366 / 1 / 347                                                     |
| Goodness-of-fit on $F^2$                       | 1.064                                                              |
| Final $R$ indexes ( $I \geq 2\sigma(I)$ )      | $R_1 = 0.0731$ , $\omega R_2 = 0.1711$                             |
| Final $R$ indexes (all data)                   | $R_1 = 0.0923$ , $\omega R_2 = 0.2016$                             |
| Largest diff. peak and hole / e/Å <sup>3</sup> | 2.73 and -1.74                                                     |

**Table S6** Bond lengths for **10a**.

| Atom | Atom | Length / Å | Atom | Atom | Length / Å |
|------|------|------------|------|------|------------|
| W    | P    | 2.452(3)   | C1   | C14  | 1.503(18)  |
| W    | C22  | 2.001(14)  | C2   | C3   | 1.393(19)  |
| W    | C23  | 2.054(14)  | C2   | C7   | 1.403(18)  |
| W    | C24  | 2.070(14)  | C3   | C4   | 1.42(2)    |
| W    | C25  | 2.043(16)  | C4   | C5   | 1.38(2)    |
| W    | C26  | 2.064(13)  | C5   | C6   | 1.38(2)    |
| P    | O1   | 1.695(9)   | C6   | C7   | 1.40(2)    |
| P    | C1   | 1.915(12)  | C8   | C9   | 1.37(2)    |
| F1   | C21  | 1.34(2)    | C8   | C13  | 1.402(19)  |
| F2   | C21  | 1.296(18)  | C9   | C10  | 1.427(18)  |
| F3   | C21  | 1.339(17)  | C10  | C11  | 1.39(2)    |
| O1   | C20  | 1.349(16)  | C11  | C12  | 1.41(2)    |
| O2   | C20  | 1.170(17)  | C12  | C13  | 1.377(18)  |
| O3   | C22  | 1.143(17)  | C14  | C15  | 1.408(17)  |
| O4   | C23  | 1.132(17)  | C14  | C19  | 1.403(18)  |
| O5   | C24  | 1.118(17)  | C15  | C16  | 1.390(19)  |
| O6   | C25  | 1.125(18)  | C16  | C17  | 1.36(2)    |
| O7   | C26  | 1.110(16)  | C17  | C18  | 1.38(2)    |
| C1   | C2   | 1.551(17)  | C18  | C19  | 1.38(2)    |
| C1   | C8   | 1.553(15)  | C20  | C21  | 1.515(18)  |

**Table S7** Bond angles for **10a**.

| Atom | Atom | Atom | Angle / ° | Atom | Atom | Atom | Angle / ° |
|------|------|------|-----------|------|------|------|-----------|
| C22  | W    | P    | 175.5(4)  | C6   | C7   | C2   | 121.0(13) |
| C22  | W    | C23  | 89.5(5)   | C9   | C8   | C1   | 119.0(11) |
| C22  | W    | C24  | 90.4(6)   | C9   | C8   | C13  | 120.1(11) |
| C22  | W    | C25  | 87.4(5)   | C13  | C8   | C1   | 120.5(12) |
| C22  | W    | C26  | 90.0(5)   | C8   | C9   | C10  | 120.1(13) |
| C23  | W    | P    | 92.0(4)   | C11  | C10  | C9   | 119.8(13) |
| C23  | W    | C24  | 88.4(5)   | C10  | C11  | C12  | 119.0(12) |
| C23  | W    | C26  | 91.6(5)   | C13  | C12  | C11  | 120.8(13) |
| C24  | W    | P    | 85.3(4)   | C12  | C13  | C8   | 120.2(13) |
| C25  | W    | P    | 91.2(4)   | C15  | C14  | C1   | 121.9(11) |
| C25  | W    | C23  | 176.8(5)  | C19  | C14  | C1   | 121.6(11) |
| C25  | W    | C24  | 92.3(5)   | C19  | C14  | C15  | 116.5(13) |
| C25  | W    | C26  | 87.7(5)   | C16  | C15  | C14  | 121.6(13) |
| C26  | W    | P    | 94.2(4)   | C17  | C16  | C15  | 119.3(13) |
| C26  | W    | C24  | 179.5(5)  | C16  | C17  | C18  | 122.0(14) |
| O1   | P    | W    | 106.6(3)  | C17  | C18  | C19  | 118.5(14) |
| O1   | P    | C1   | 97.5(5)   | C18  | C19  | C14  | 122.1(13) |
| C1   | P    | W    | 130.6(4)  | O1   | C20  | C21  | 109.8(12) |
| C20  | O1   | P    | 124.0(9)  | O2   | C20  | O1   | 126.1(12) |
| C2   | C1   | P    | 105.8(8)  | O2   | C20  | C21  | 124.0(12) |
| C2   | C1   | C8   | 109.3(10) | F1   | C21  | C20  | 110.4(12) |
| C8   | C1   | P    | 108.2(8)  | F2   | C21  | F1   | 107.3(11) |
| C14  | C1   | P    | 107.0(8)  | F2   | C21  | F3   | 109.0(12) |
| C14  | C1   | C2   | 113.9(10) | F2   | C21  | C20  | 111.3(14) |
| C14  | C1   | C8   | 112.2(9)  | F3   | C21  | F1   | 106.5(13) |
| C3   | C2   | C1   | 118.3(12) | F3   | C21  | C20  | 112.1(11) |
| C3   | C2   | C7   | 118.9(12) | O3   | C22  | W    | 178.8(12) |
| C7   | C2   | C1   | 122.8(11) | O4   | C23  | W    | 176.6(12) |
| C2   | C3   | C4   | 119.3(13) | O5   | C24  | W    | 178.8(13) |
| C5   | C4   | C3   | 120.6(13) | O6   | C25  | W    | 177.6(13) |
| C6   | C5   | C4   | 120.6(14) | O7   | C26  | W    | 178.7(13) |
| C5   | C6   | C7   | 119.5(14) |      |      |      |           |



**Table S8** Torsion angles for **10a**.

| A  | B   | C   | D   | Angle / °  | A   | B   | C   | D   | Angle / ° |
|----|-----|-----|-----|------------|-----|-----|-----|-----|-----------|
| W  | P   | O1  | C20 | 102.8(10)  | C2  | C3  | C4  | C5  | -2(2)     |
| P  | O1  | C20 | O2  | -4(2)      | C3  | C2  | C7  | C6  | -0.7(18)  |
| P  | O1  | C20 | C21 | -179.2(9)  | C3  | C4  | C5  | C6  | 0(2)      |
| P  | C1  | C2  | C3  | 60.1(13)   | C4  | C5  | C6  | C7  | 1(2)      |
| P  | C1  | C2  | C7  | -119.6(11) | C5  | C6  | C7  | C2  | -1(2)     |
| P  | C1  | C8  | C9  | -148.7(10) | C7  | C2  | C3  | C4  | 1.8(19)   |
| P  | C1  | C8  | C13 | 38.1(13)   | C8  | C1  | C2  | C3  | -56.2(14) |
| P  | C1  | C14 | C15 | -126.6(11) | C8  | C1  | C2  | C7  | 124.1(12) |
| P  | C1  | C14 | C19 | 53.7(14)   | C8  | C1  | C14 | C15 | -8.0(16)  |
| O1 | C20 | C21 | F1  | 79.9(14)   | C8  | C1  | C14 | C19 | 172.3(12) |
| O1 | C20 | C21 | F2  | -161.1(12) | C8  | C9  | C10 | C11 | -1(2)     |
| O1 | C20 | C21 | F3  | -38.7(18)  | C9  | C8  | C13 | C12 | 0.9(19)   |
| O2 | C20 | C21 | F1  | -95.6(19)  | C9  | C10 | C11 | C12 | 2(2)      |
| O2 | C20 | C21 | F2  | 23(2)      | C10 | C11 | C12 | C13 | -1(2)     |
| O2 | C20 | C21 | F3  | 145.8(15)  | C11 | C12 | C13 | C8  | -1(2)     |
| C1 | P   | O1  | C20 | -120.7(11) | C13 | C8  | C9  | C10 | 0.1(19)   |
| C1 | C2  | C3  | C4  | -177.9(12) | C14 | C1  | C2  | C3  | 177.4(11) |
| C1 | C2  | C7  | C6  | 179.0(12)  | C14 | C1  | C2  | C7  | -2.3(16)  |
| C1 | C8  | C9  | C10 | -173.2(12) | C14 | C1  | C8  | C9  | 93.4(14)  |
| C1 | C8  | C13 | C12 | 174.1(12)  | C14 | C1  | C8  | C13 | -79.8(14) |
| C1 | C14 | C15 | C16 | 178.8(12)  | C14 | C15 | C16 | C17 | 1(2)      |
| C1 | C14 | C19 | C18 | -179.6(12) | C15 | C14 | C19 | C18 | 1(2)      |
| C2 | C1  | C8  | C9  | -33.9(15)  | C15 | C16 | C17 | C18 | 1(2)      |
| C2 | C1  | C8  | C13 | 152.8(11)  | C16 | C17 | C18 | C19 | -2(2)     |
| C2 | C1  | C14 | C15 | 116.8(12)  | C17 | C18 | C19 | C14 | 1(2)      |
| C2 | C1  | C14 | C19 | -62.9(15)  | C19 | C14 | C15 | C16 | -1.5(18)  |

## Compound 10a-Cr

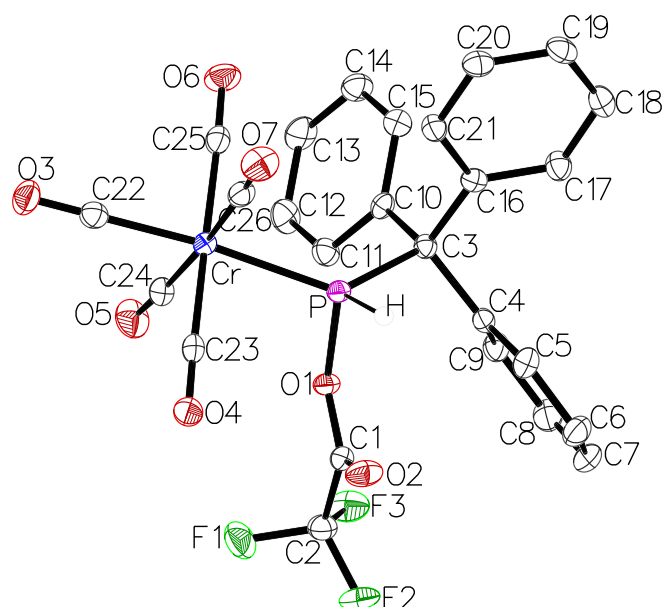

**Fig. S105** Molecular structures of **10a-Cr** in the single crystal lattice at 123(2) K. Thermal ellipsoids are set at 50% probability level. Hydrogen atoms were omitted for clarity except for those bound to phosphorus atoms. Suitable single crystals were obtained as clear colourless blocks by slow evaporation of a solution of 1.9 mg of **10a-Cr** in 0.6 mL of *n*-pentane at ambient temperature in a glovebox. CCDC-2302948.

**Table S9** Crystal data and structure refinements for **10a-Cr**.

|                                   |                                                                   |
|-----------------------------------|-------------------------------------------------------------------|
| Identification code               | GSTR770, DB-557 // GXray6913                                      |
| Crystal habitus                   | clear colourless plate                                            |
| Device type                       | STOE IPDS-2T                                                      |
| Empirical formula                 | C <sub>26</sub> H <sub>16</sub> CrF <sub>3</sub> O <sub>7</sub> P |
| Moiety formula                    | C <sub>26</sub> H <sub>16</sub> CrF <sub>3</sub> O <sub>7</sub> P |
| Formula weight / g/mol            | 580.36                                                            |
| <i>T</i> / K                      | 123(2)                                                            |
| Crystal system                    | monoclinic                                                        |
| Space group                       | <i>P</i> 2 <sub>1</sub> / <i>c</i>                                |
| <i>a</i> / Å                      | 11.7074(11)                                                       |
| <i>b</i> / Å                      | 10.9879(9)                                                        |
| <i>c</i> / Å                      | 19.4438(23)                                                       |
| $\alpha$ / °                      | 90.00                                                             |
| $\beta$ / °                       | 95.019(8)                                                         |
| $\gamma$ / °                      | 90.00                                                             |
| <i>V</i> / Å <sup>3</sup>         | 2491.7(4)                                                         |
| <i>Z</i>                          | 4                                                                 |
| $\rho_{calc}$ / g/cm <sup>3</sup> | 1.547                                                             |
| $\mu$ / mm <sup>-1</sup>          | 0.17                                                              |
| <i>F</i> (000)                    | 1176.0                                                            |
| Crystal size / mm <sup>3</sup>    | 0.3 × 0.25 × 0.14                                                 |
| Absorption correction             | integration                                                       |

|                                                |                                                              |
|------------------------------------------------|--------------------------------------------------------------|
| Min. and max. transmission                     | 0.8377 and 0.9602                                            |
| Radiation                                      | Mo-K $\alpha$ ( $\lambda = 0.71073$ Å)                       |
| 2 $\theta$ range for data collection / °       | 4.206 to 55.992                                              |
| Completeness to $\theta$                       | 0.990                                                        |
| Index ranges                                   | $-15 \leq h \leq 12, -14 \leq k \leq 13, -24 \leq l \leq 25$ |
| Reflections collected                          | 12331                                                        |
| Independent reflections                        | 13501 ( $R_{int} = 0.0396, R_{\sigma} = 0.0468$ )            |
| Data / restraints / parameters                 | 13501 / 0 / 346                                              |
| Goodness-of-fit on $F^2$                       | 1.013                                                        |
| Final $R$ indexes ( $I \geq 2\sigma(I)$ )      | $R_1 = 0.0296, \omega R_2 = 0.0776$                          |
| Final $R$ indexes (all data)                   | $R_1 = 0.0433, \omega R_2 = 0.0814$                          |
| Largest diff. peak and hole / e/Å <sup>3</sup> | 0.39 and -0.50                                               |

**Table S10** Bond lengths for **10a-Cr**.

| Atom | Atom | Length / Å | Atom | Atom | Length / Å |
|------|------|------------|------|------|------------|
| Cr   | P    | 2.3224(5)  | C3   | C10  | 1.543(2)   |
| Cr   | C22  | 1.8880(17) | C3   | C16  | 1.5394(19) |
| Cr   | C23  | 1.9096(17) | C4   | C5   | 1.401(2)   |
| Cr   | C24  | 1.9071(17) | C4   | C9   | 1.393(2)   |
| Cr   | C25  | 1.9158(17) | C5   | C6   | 1.388(2)   |
| Cr   | C26  | 1.9115(16) | C6   | C7   | 1.391(2)   |
| P    | O1   | 1.7017(10) | C7   | C8   | 1.378(3)   |
| P    | C3   | 1.9148(16) | C8   | C9   | 1.395(2)   |
| F1   | C2   | 1.3311(19) | C10  | C11  | 1.400(2)   |
| F2   | C2   | 1.3259(19) | C10  | C15  | 1.392(2)   |
| F3   | C2   | 1.3385(19) | C11  | C12  | 1.385(2)   |
| O1   | C1   | 1.3280(18) | C12  | C13  | 1.392(3)   |
| O2   | C1   | 1.1958(19) | C13  | C14  | 1.381(2)   |
| O3   | C22  | 1.143(2)   | C14  | C15  | 1.390(2)   |
| O4   | C23  | 1.143(2)   | C16  | C17  | 1.397(2)   |
| O5   | C24  | 1.1388(19) | C16  | C21  | 1.397(2)   |
| O6   | C25  | 1.140(2)   | C17  | C18  | 1.389(2)   |
| O7   | C26  | 1.1378(19) | C18  | C19  | 1.393(2)   |
| C1   | C2   | 1.536(2)   | C19  | C20  | 1.383(2)   |
| C3   | C4   | 1.548(2)   | C20  | C21  | 1.393(2)   |

**Table S11** Bond angles for **10a-Cr**.

| Atom | Atom | Atom | Angle / ° | Atom | Atom | Atom | Angle / °  |
|------|------|------|-----------|------|------|------|------------|
| C22  | Cr   | P    | 174.95(5) | C16  | C3   | C4   | 110.18(12) |
| C22  | Cr   | C23  | 90.45(7)  | C16  | C3   | C10  | 110.43(12) |
| C22  | Cr   | C24  | 87.59(7)  | C5   | C4   | C3   | 119.15(13) |
| C22  | Cr   | C25  | 90.37(7)  | C9   | C4   | C3   | 122.72(14) |
| C22  | Cr   | C26  | 88.88(7)  | C9   | C4   | C5   | 118.13(14) |

|     |    |     |            |     |     |     |            |
|-----|----|-----|------------|-----|-----|-----|------------|
| C23 | Cr | P   | 84.68(5)   | C6  | C5  | C4  | 121.21(15) |
| C23 | Cr | C25 | 178.85(7)  | C5  | C6  | C7  | 119.95(16) |
| C23 | Cr | C26 | 89.25(7)   | C8  | C7  | C6  | 119.37(15) |
| C24 | Cr | P   | 91.10(5)   | C7  | C8  | C9  | 120.91(15) |
| C24 | Cr | C23 | 90.88(7)   | C4  | C9  | C8  | 120.40(15) |
| C24 | Cr | C25 | 88.36(7)   | C11 | C10 | C3  | 120.07(13) |
| C24 | Cr | C26 | 176.46(7)  | C15 | C10 | C3  | 121.96(13) |
| C25 | Cr | P   | 94.47(5)   | C15 | C10 | C11 | 117.96(14) |
| C26 | Cr | P   | 92.43(5)   | C12 | C11 | C10 | 121.05(15) |
| C26 | Cr | C25 | 91.56(7)   | C11 | C12 | C13 | 120.36(16) |
| O1  | P  | Cr  | 106.46(4)  | C14 | C13 | C12 | 119.03(15) |
| O1  | P  | C3  | 97.56(6)   | C13 | C14 | C15 | 120.73(16) |
| C3  | P  | Cr  | 131.96(5)  | C14 | C15 | C10 | 120.87(15) |
| C1  | O1 | P   | 124.16(9)  | C17 | C16 | C3  | 119.58(13) |
| O1  | C1 | C2  | 109.26(12) | C17 | C16 | C21 | 118.30(13) |
| O2  | C1 | O1  | 127.93(14) | C21 | C16 | C3  | 121.86(14) |
| O2  | C1 | C2  | 122.74(14) | C18 | C17 | C16 | 120.82(14) |
| F1  | C2 | F3  | 107.63(14) | C17 | C18 | C19 | 120.32(16) |
| F1  | C2 | C1  | 109.83(13) | C20 | C19 | C18 | 119.44(14) |
| F2  | C2 | F1  | 108.75(13) | C19 | C20 | C21 | 120.32(14) |
| F2  | C2 | F3  | 108.41(13) | C20 | C21 | C16 | 120.80(15) |
| F2  | C2 | C1  | 110.39(13) | O3  | C22 | Cr  | 178.80(14) |
| F3  | C2 | C1  | 111.75(13) | O4  | C23 | Cr  | 178.32(15) |
| C4  | C3 | P   | 106.61(10) | O5  | C24 | Cr  | 176.75(15) |
| C10 | C3 | P   | 107.29(10) | O6  | C25 | Cr  | 177.71(14) |
| C10 | C3 | C4  | 113.57(12) | O7  | C26 | Cr  | 177.31(15) |
| C16 | C3 | P   | 108.54(10) |     |     |     |            |

---

## Compound 11a

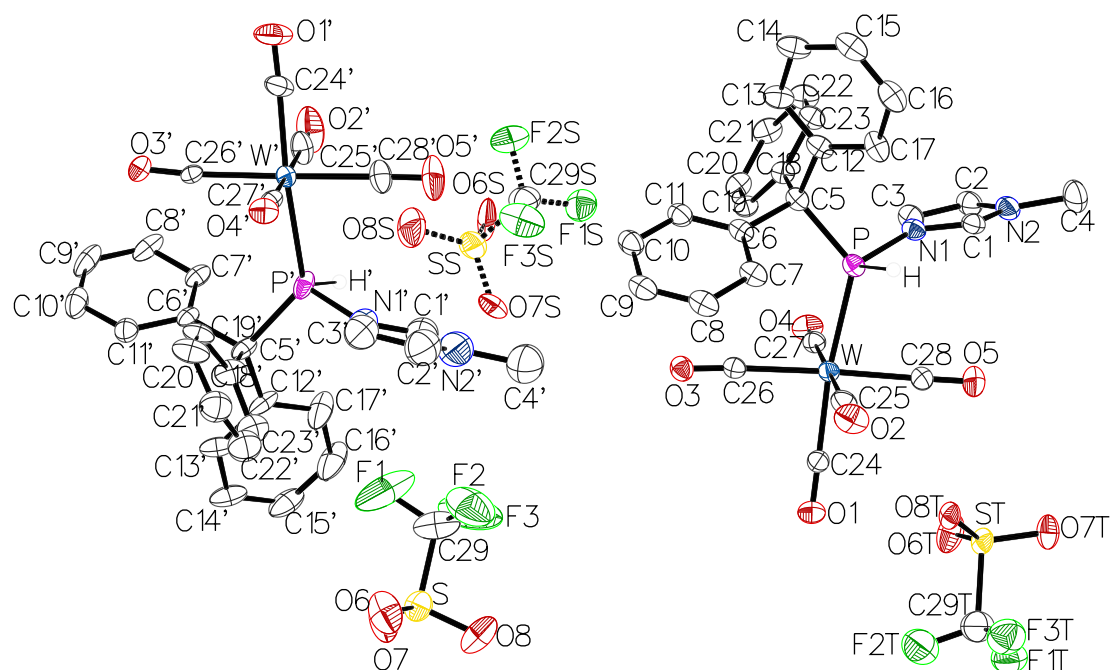

**Fig. S106** Molecular structures of **11a** in the single crystal lattice at 100(2) K. Thermal ellipsoids are set at 50% probability level. Solvent molecules and hydrogen atoms were omitted for clarity except for those bound to phosphorus atoms. Suitable single crystals were obtained as clear colourless blocks by vapour diffusion of *n*-pentane into a concentrated solution of **11a** in dichloromethane at  $-40\text{ }^{\circ}\text{C}$  in a glovebox. CCDC-2302949.

**Table S12** Crystal data and structure refinements for **11a**.

|                                          |                                                                                                                                  |
|------------------------------------------|----------------------------------------------------------------------------------------------------------------------------------|
| Identification code                      | GSTR794, DB-571-2 // GXraymo_7115f                                                                                               |
| Crystal habitus                          | clear colourless block                                                                                                           |
| Device type                              | Bruker D8 Venture                                                                                                                |
| Empirical formula                        | $\text{C}_{30.25}\text{H}_{25}\text{F}_3\text{N}_2\text{O}_8\text{PSW}$                                                          |
| Moiety formula                           | $\text{C}_{28}\text{H}_{22}\text{N}_2\text{O}_5\text{PW}$ , $\text{CF}_3\text{O}_3\text{S}$ , 0.25 ( $\text{C}_5\text{H}_{12}$ ) |
| Formula weight / g/mol                   | 848.40                                                                                                                           |
| <i>T</i> / K                             | 100.0                                                                                                                            |
| Crystal system                           | monoclinic                                                                                                                       |
| Space group                              | <i>C2/c</i>                                                                                                                      |
| <i>a</i> / Å                             | 54.221(3)                                                                                                                        |
| <i>b</i> / Å                             | 8.9542(5)                                                                                                                        |
| <i>c</i> / Å                             | 32.5364(19)                                                                                                                      |
| $\alpha$ / °                             | 90                                                                                                                               |
| $\beta$ / °                              | 125.097(2)                                                                                                                       |
| $\gamma$ / °                             | 90                                                                                                                               |
| <i>V</i> / Å <sup>3</sup>                | 12924.5(13)                                                                                                                      |
| <i>Z</i>                                 | 16                                                                                                                               |
| $\rho_{\text{calc}}$ / g/cm <sup>3</sup> | 1.744                                                                                                                            |
| $\mu$ / mm <sup>-1</sup>                 | 3.758                                                                                                                            |
| <i>F</i> (000)                           | 6664.0                                                                                                                           |
| Crystal size / mm <sup>3</sup>           | 0.24 × 0.08 × 0.06                                                                                                               |

|                                                |                                                              |
|------------------------------------------------|--------------------------------------------------------------|
| Absorption correction                          | multi-scan                                                   |
| Min. and max. transmission                     | 0.5844 and 0.7464                                            |
| Radiation                                      | Mo-K $\alpha$ ( $\lambda = 0.71073$ Å)                       |
| 2 $\theta$ range for data collection / °       | 3.672 to 58.5                                                |
| Completeness to $\theta$                       | 0.999                                                        |
| Index ranges                                   | $-74 \leq h \leq 74, -12 \leq k \leq 12, -44 \leq l \leq 43$ |
| Reflections collected                          | 145150                                                       |
| Independent reflections                        | 17600 ( $R_{int} = 0.0551, R_{\sigma} = 0.0319$ )            |
| Data / restraints / parameters                 | 17600 / 942 / 940                                            |
| Goodness-of-fit on $F^2$                       | 1.035                                                        |
| Final $R$ indexes ( $I \geq 2\sigma(I)$ )      | $R_1 = 0.0452, \omega R_2 = 0.1066$                          |
| Final $R$ indexes (all data)                   | $R_1 = 0.0510, \omega R_2 = 0.1104$                          |
| Largest diff. peak and hole / e/Å <sup>3</sup> | 2.91 and -1.68                                               |

**Table S13** Bond lengths for **11a**.

| Atom | Atom | Length / Å | Atom | Atom | Length / Å |
|------|------|------------|------|------|------------|
| W    | P    | 2.4815(12) | N1'  | C1'  | 1.372(9)   |
| W    | C24  | 2.018(5)   | N1'  | C3'  | 1.423(9)   |
| W    | C25  | 2.051(5)   | N2'  | C1'  | 1.363(10)  |
| W    | C26  | 2.055(5)   | N2'  | C2'  | 1.291(11)  |
| W    | C27  | 2.046(5)   | N2'  | C4'  | 1.529(11)  |
| W    | C28  | 2.039(5)   | C2'  | C3'  | 1.382(11)  |
| P    | N1   | 1.776(4)   | C5'  | C6'  | 1.530(6)   |
| P    | C5   | 1.894(5)   | C5'  | C12' | 1.547(6)   |
| O1   | C24  | 1.147(6)   | C5'  | C18' | 1.538(7)   |
| O2   | C25  | 1.136(6)   | C6'  | C7'  | 1.394(6)   |
| O3   | C26  | 1.140(6)   | C6'  | C11' | 1.394(7)   |
| O4   | C27  | 1.140(6)   | C7'  | C8'  | 1.387(6)   |
| O5   | C28  | 1.143(6)   | C8'  | C9'  | 1.373(9)   |
| N1   | C1   | 1.334(6)   | C9'  | C10' | 1.391(9)   |
| N1   | C3   | 1.398(6)   | C10' | C11' | 1.386(7)   |
| N2   | C1   | 1.322(6)   | C12' | C13' | 1.395(8)   |
| N2   | C2   | 1.386(7)   | C12' | C17' | 1.366(8)   |
| N2   | C4   | 1.460(7)   | C13' | C14' | 1.386(7)   |
| C2   | C3   | 1.346(7)   | C14' | C15' | 1.372(9)   |
| C5   | C6   | 1.540(6)   | C15' | C16' | 1.359(10)  |
| C5   | C12  | 1.545(6)   | C16' | C17' | 1.420(8)   |
| C5   | C18  | 1.537(6)   | C18' | C19' | 1.394(7)   |
| C6   | C7   | 1.399(7)   | C18' | C23' | 1.388(8)   |
| C6   | C11  | 1.378(7)   | C19' | C20' | 1.389(7)   |
| C7   | C8   | 1.399(7)   | C20' | C21' | 1.376(9)   |
| C8   | C9   | 1.371(8)   | C21' | C22' | 1.340(10)  |
| C9   | C10  | 1.391(8)   | C22' | C23' | 1.409(9)   |
| C10  | C11  | 1.400(7)   | S    | O6   | 1.446(5)   |

|     |      |            |     |      |            |
|-----|------|------------|-----|------|------------|
| C12 | C13  | 1.393(7)   | S   | O7   | 1.426(5)   |
| C12 | C17  | 1.390(7)   | S   | O8   | 1.433(5)   |
| C13 | C14  | 1.395(7)   | S   | C29  | 1.775(8)   |
| C14 | C15  | 1.395(8)   | F1  | C29  | 1.330(11)  |
| C15 | C16  | 1.382(9)   | F2  | C29  | 1.349(11)  |
| C16 | C17  | 1.405(7)   | F3  | C29  | 1.322(11)  |
| C18 | C19  | 1.397(6)   | SS  | O6S  | 1.435(8)   |
| C18 | C23  | 1.402(6)   | SS  | O7S  | 1.394(9)   |
| C19 | C20  | 1.394(6)   | SS  | O8S  | 1.455(8)   |
| C20 | C21  | 1.390(7)   | SS  | C29S | 1.806(11)  |
| C21 | C22  | 1.392(7)   | F1S | C29S | 1.275(12)  |
| C22 | C23  | 1.393(6)   | F2S | C29S | 1.326(11)  |
| W'  | P'   | 2.4947(13) | F3S | C29S | 1.337(12)  |
| W'  | C24' | 2.002(5)   | ST  | O6T  | 1.442(9)   |
| W'  | C25' | 2.041(5)   | ST  | O7T  | 1.417(8)   |
| W'  | C26' | 2.044(4)   | ST  | O8T  | 1.441(7)   |
| W'  | C27' | 2.065(5)   | ST  | C29T | 1.859(12)  |
| W'  | C28' | 2.052(5)   | F1T | C29T | 1.334(12)  |
| P'  | N1'  | 1.776(5)   | F2T | C29T | 1.297(13)  |
| P'  | C5'  | 1.889(5)   | F3T | C29T | 1.350(13)  |
| O1' | C24' | 1.144(6)   | C30 | C31  | 1.5191(10) |
| O2' | C25' | 1.135(7)   | C31 | C32  | 1.5200(10) |
| O3' | C26' | 1.138(5)   | C32 | C33  | 1.5204(10) |
| O4' | C27' | 1.129(6)   | C33 | C34  | 1.5201(10) |
| O5' | C28' | 1.135(7)   |     |      |            |

**Table S14** Bond angles for **11a**.

| Atom | Atom | Atom | Angle / °  | Atom | Atom | Atom | Angle / ° |
|------|------|------|------------|------|------|------|-----------|
| C24  | W    | P    | 172.72(14) | C3'  | N1'  | P'   | 125.3(5)  |
| C24  | W    | C25  | 88.8(2)    | C1'  | N2'  | C4'  | 116.9(7)  |
| C24  | W    | C26  | 88.69(18)  | C2'  | N2'  | C1'  | 112.7(7)  |
| C24  | W    | C27  | 90.23(18)  | C2'  | N2'  | C4'  | 130.4(8)  |
| C24  | W    | C28  | 88.73(19)  | N2'  | C1'  | N1'  | 103.5(6)  |
| C25  | W    | P    | 86.12(14)  | N2'  | C2'  | C3'  | 110.5(8)  |
| C25  | W    | C26  | 89.52(19)  | C2'  | C3'  | N1'  | 102.4(7)  |
| C26  | W    | P    | 96.43(13)  | C6'  | C5'  | P'   | 105.7(3)  |
| C27  | W    | P    | 94.85(13)  | C6'  | C5'  | C12' | 106.4(3)  |
| C27  | W    | C25  | 178.9(2)   | C6'  | C5'  | C18' | 113.6(4)  |
| C27  | W    | C26  | 90.87(18)  | C12' | C5'  | P'   | 116.3(4)  |
| C28  | W    | P    | 86.22(15)  | C18' | C5'  | P'   | 103.4(3)  |
| C28  | W    | C25  | 91.2(2)    | C18' | C5'  | C12' | 111.6(4)  |
| C28  | W    | C26  | 177.29(19) | C7'  | C6'  | C5'  | 119.3(4)  |
| C28  | W    | C27  | 88.3(2)    | C11' | C6'  | C5'  | 122.2(4)  |
| N1   | P    | W    | 110.94(14) | C11' | C6'  | C7'  | 118.4(4)  |
| N1   | P    | C5   | 103.78(19) | C8'  | C7'  | C6'  | 121.0(5)  |

|      |     |     |            |      |      |      |           |
|------|-----|-----|------------|------|------|------|-----------|
| C5   | P   | W   | 127.57(15) | C9'  | C8'  | C7'  | 120.3(5)  |
| C1   | N1  | P   | 124.9(3)   | C8'  | C9'  | C10' | 119.3(5)  |
| C1   | N1  | C3  | 107.9(4)   | C11' | C10' | C9'  | 120.8(5)  |
| C3   | N1  | P   | 125.4(3)   | C10' | C11' | C6'  | 120.2(5)  |
| C1   | N2  | C2  | 109.0(4)   | C13' | C12' | C5'  | 116.5(5)  |
| C1   | N2  | C4  | 125.7(5)   | C17' | C12' | C5'  | 125.6(5)  |
| C2   | N2  | C4  | 125.3(5)   | C17' | C12' | C13' | 117.8(5)  |
| N2   | C1  | N1  | 109.0(5)   | C14' | C13' | C12' | 121.5(6)  |
| C3   | C2  | N2  | 107.0(5)   | C15' | C14' | C13' | 120.0(6)  |
| C2   | C3  | N1  | 107.1(5)   | C16' | C15' | C14' | 119.8(5)  |
| C6   | C5  | P   | 104.6(3)   | C15' | C16' | C17' | 120.3(7)  |
| C6   | C5  | C12 | 106.3(4)   | C12' | C17' | C16' | 120.6(7)  |
| C12  | C5  | P   | 117.2(3)   | C19' | C18' | C5'  | 119.5(5)  |
| C18  | C5  | P   | 103.6(3)   | C23' | C18' | C5'  | 123.1(5)  |
| C18  | C5  | C6  | 114.5(4)   | C23' | C18' | C19' | 117.3(5)  |
| C18  | C5  | C12 | 110.8(4)   | C20' | C19' | C18' | 120.7(5)  |
| C7   | C6  | C5  | 118.4(4)   | C21' | C20' | C19' | 120.3(6)  |
| C11  | C6  | C5  | 122.4(4)   | C22' | C21' | C20' | 120.5(7)  |
| C11  | C6  | C7  | 119.1(4)   | C21' | C22' | C23' | 119.9(7)  |
| C6   | C7  | C8  | 120.3(5)   | C18' | C23' | C22' | 121.2(6)  |
| C9   | C8  | C7  | 120.4(5)   | O1'  | C24' | W'   | 177.6(5)  |
| C8   | C9  | C10 | 119.4(5)   | O2'  | C25' | W'   | 177.1(6)  |
| C9   | C10 | C11 | 120.5(5)   | O3'  | C26' | W'   | 175.4(4)  |
| C6   | C11 | C10 | 120.2(5)   | O4'  | C27' | W'   | 177.0(4)  |
| C13  | C12 | C5  | 116.4(4)   | O5'  | C28' | W'   | 178.6(6)  |
| C17  | C12 | C5  | 125.0(5)   | O6   | S    | C29  | 104.6(4)  |
| C17  | C12 | C13 | 118.6(5)   | O7   | S    | O6   | 117.4(3)  |
| C12  | C13 | C14 | 121.5(5)   | O7   | S    | O8   | 113.8(3)  |
| C15  | C14 | C13 | 119.6(6)   | O7   | S    | C29  | 103.0(4)  |
| C16  | C15 | C14 | 119.1(5)   | O8   | S    | O6   | 113.1(3)  |
| C15  | C16 | C17 | 121.1(5)   | O8   | S    | C29  | 102.5(4)  |
| C12  | C17 | C16 | 120.0(5)   | F1   | C29  | S    | 110.9(8)  |
| C19  | C18 | C5  | 120.8(4)   | F1   | C29  | F2   | 106.6(8)  |
| C19  | C18 | C23 | 118.5(4)   | F2   | C29  | S    | 110.8(6)  |
| C23  | C18 | C5  | 120.3(4)   | F3   | C29  | S    | 111.8(6)  |
| C20  | C19 | C18 | 120.4(4)   | F3   | C29  | F1   | 109.4(8)  |
| C21  | C20 | C19 | 121.0(5)   | F3   | C29  | F2   | 107.1(9)  |
| C20  | C21 | C22 | 118.8(5)   | O6S  | SS   | O8S  | 114.0(5)  |
| C21  | C22 | C23 | 120.6(5)   | O6S  | SS   | C29S | 100.5(5)  |
| C22  | C23 | C18 | 120.7(5)   | O7S  | SS   | O6S  | 117.9(5)  |
| O1   | C24 | W   | 179.3(4)   | O7S  | SS   | O8S  | 116.6(5)  |
| O2   | C25 | W   | 178.8(7)   | O7S  | SS   | C29S | 101.8(8)  |
| O3   | C26 | W   | 176.6(4)   | O8S  | SS   | C29S | 102.0(6)  |
| O4   | C27 | W   | 177.5(4)   | F1S  | C29S | SS   | 110.4(7)  |
| O5   | C28 | W   | 177.6(5)   | F1S  | C29S | F2S  | 108.3(9)  |
| C24' | W'  | P'  | 173.81(17) | F1S  | C29S | F3S  | 107.3(10) |



|      |     |      |            |     |      |      |            |
|------|-----|------|------------|-----|------|------|------------|
| C24' | W'  | C25' | 88.5(2)    | F2S | C29S | SS   | 111.4(8)   |
| C24' | W'  | C26' | 87.3(2)    | F2S | C29S | F3S  | 109.6(9)   |
| C24' | W'  | C27' | 88.8(2)    | F3S | C29S | SS   | 109.7(8)   |
| C24' | W'  | C28' | 91.9(2)    | O6T | ST   | C29T | 104.4(6)   |
| C25' | W'  | P'   | 86.61(18)  | O7T | ST   | O6T  | 115.4(5)   |
| C25' | W'  | C26' | 89.44(19)  | O7T | ST   | O8T  | 116.3(6)   |
| C25' | W'  | C27' | 177.2(2)   | O7T | ST   | C29T | 101.2(5)   |
| C25' | W'  | C28' | 89.7(2)    | O8T | ST   | O6T  | 114.8(5)   |
| C26' | W'  | P'   | 96.50(12)  | O8T | ST   | C29T | 101.7(5)   |
| C26' | W'  | C27' | 91.40(17)  | F1T | C29T | ST   | 109.6(8)   |
| C26' | W'  | C28' | 178.8(2)   | F1T | C29T | F3T  | 107.4(8)   |
| C27' | W'  | P'   | 95.98(13)  | F2T | C29T | ST   | 112.7(9)   |
| C28' | W'  | P'   | 84.25(17)  | F2T | C29T | F1T  | 110.5(9)   |
| C28' | W'  | C27' | 89.4(2)    | F2T | C29T | F3T  | 109.5(9)   |
| N1'  | P'  | W'   | 110.87(17) | F3T | C29T | ST   | 107.0(8)   |
| N1'  | P'  | C5'  | 103.1(2)   | C30 | C31  | C32  | 113.45(11) |
| C5'  | P'  | W'   | 127.84(15) | C31 | C32  | C33  | 113.30(11) |
| C1'  | N1' | P'   | 122.2(5)   | C32 | C33  | C34  | 113.32(11) |
| C1'  | N1' | C3'  | 110.9(6)   |     |      |      |            |

**Table S15** Torsion angles for **11a**.

| A  | B  | C   | D   | Angle / ° | A   | B    | C    | D    | Angle / ° |
|----|----|-----|-----|-----------|-----|------|------|------|-----------|
| W  | P  | N1  | C1  | -104.3(4) | N1' | P'   | C5'  | C18' | 53.1(4)   |
| W  | P  | N1  | C3  | 58.9(4)   | N2' | C2'  | C3'  | N1'  | -1.9(9)   |
| W  | P  | C5  | C6  | 43.1(3)   | C1' | N1'  | C3'  | C2'  | 1.1(8)    |
| W  | P  | C5  | C12 | 160.4(2)  | C1' | N2'  | C2'  | C3'  | 2.1(10)   |
| W  | P  | C5  | C18 | -77.2(3)  | C2' | N2'  | C1'  | N1'  | -1.3(8)   |
| P  | N1 | C1  | N2  | 165.9(3)  | C3' | N1'  | C1'  | N2'  | 0.0(8)    |
| P  | N1 | C3  | C2  | -166.5(4) | C4' | N2'  | C1'  | N1'  | -179.7(6) |
| P  | C5 | C6  | C7  | 45.6(5)   | C4' | N2'  | C2'  | C3'  | -179.8(8) |
| P  | C5 | C6  | C11 | -138.5(4) | C5' | P'   | N1'  | C1'  | 113.9(5)  |
| P  | C5 | C12 | C13 | 177.6(3)  | C5' | P'   | N1'  | C3'  | -81.8(6)  |
| P  | C5 | C12 | C17 | -4.0(6)   | C5' | C6'  | C7'  | C8'  | 178.2(4)  |
| P  | C5 | C18 | C19 | 71.1(5)   | C5' | C6'  | C11' | C10' | -176.1(4) |
| P  | C5 | C18 | C23 | -101.4(4) | C5' | C12' | C13' | C14' | 177.0(5)  |
| N1 | P  | C5  | C6  | 173.8(3)  | C5' | C12' | C17' | C16' | -177.6(6) |
| N1 | P  | C5  | C12 | -68.8(3)  | C5' | C18' | C19' | C20' | -174.1(5) |
| N1 | P  | C5  | C18 | 53.5(3)   | C5' | C18' | C23' | C22' | 174.0(6)  |
| N2 | C2 | C3  | N1  | 1.3(6)    | C6' | C5'  | C12' | C13' | -56.3(6)  |
| C1 | N1 | C3  | C2  | -1.0(6)   | C6' | C5'  | C12' | C17' | 120.9(6)  |
| C1 | N2 | C2  | C3  | -1.1(6)   | C6' | C5'  | C18' | C19' | -44.3(6)  |
| C2 | N2 | C1  | N1  | 0.4(6)    | C6' | C5'  | C18' | C23' | 139.9(5)  |
| C3 | N1 | C1  | N2  | 0.3(5)    | C6' | C7'  | C8'  | C9'  | -2.4(7)   |
| C4 | N2 | C1  | N1  | 178.8(5)  | C7' | C6'  | C11' | C10' | -0.4(7)   |
| C4 | N2 | C2  | C3  | -179.5(5) | C7' | C8'  | C9'  | C10' | 0.4(8)    |

|     |     |     |      |           |      |      |      |      |           |
|-----|-----|-----|------|-----------|------|------|------|------|-----------|
| C5  | P   | N1  | C1   | 115.7(4)  | C8'  | C9'  | C10' | C11' | 1.5(8)    |
| C5  | P   | N1  | C3   | -81.2(4)  | C9'  | C10' | C11' | C6'  | -1.5(8)   |
| C5  | C6  | C7  | C8   | 179.5(4)  | C11' | C6'  | C7'  | C8'  | 2.4(6)    |
| C5  | C6  | C11 | C10  | -176.8(4) | C12' | C5'  | C6'  | C7'  | -77.9(5)  |
| C5  | C12 | C13 | C14  | 179.7(4)  | C12' | C5'  | C6'  | C11' | 97.7(5)   |
| C5  | C12 | C17 | C16  | -179.5(4) | C12' | C5'  | C18' | C19' | -164.6(5) |
| C5  | C18 | C19 | C20  | -173.4(4) | C12' | C5'  | C18' | C23' | 19.7(7)   |
| C5  | C18 | C23 | C22  | 173.4(5)  | C12' | C13' | C14' | C15' | 1.4(8)    |
| C6  | C5  | C12 | C13  | -66.0(5)  | C13' | C12' | C17' | C16' | -0.3(10)  |
| C6  | C5  | C12 | C17  | 112.5(5)  | C13' | C14' | C15' | C16' | -1.4(9)   |
| C6  | C5  | C18 | C19  | -42.1(6)  | C14' | C15' | C16' | C17' | 0.6(12)   |
| C6  | C5  | C18 | C23  | 145.3(4)  | C15' | C16' | C17' | C12' | 0.3(13)   |
| C6  | C7  | C8  | C9   | -3.3(7)   | C17' | C12' | C13' | C14' | -0.4(8)   |
| C7  | C6  | C11 | C10  | -0.9(7)   | C18' | C5'  | C6'  | C7'  | 158.9(4)  |
| C7  | C8  | C9  | C10  | 0.5(7)    | C18' | C5'  | C6'  | C11' | -25.5(6)  |
| C8  | C9  | C10 | C11  | 2.1(8)    | C18' | C5'  | C12' | C13' | 68.1(6)   |
| C9  | C10 | C11 | C6   | -1.9(8)   | C18' | C5'  | C12' | C17' | -114.6(7) |
| C11 | C6  | C7  | C8   | 3.5(7)    | C18' | C19' | C20' | C21' | 0.6(9)    |
| C12 | C5  | C6  | C7   | -79.0(5)  | C19' | C18' | C23' | C22' | -1.9(9)   |
| C12 | C5  | C6  | C11  | 96.9(5)   | C19' | C20' | C21' | C22' | -3.3(10)  |
| C12 | C5  | C18 | C19  | -162.4(4) | C20' | C21' | C22' | C23' | 3.4(11)   |
| C12 | C5  | C18 | C23  | 25.0(6)   | C21' | C22' | C23' | C18' | -0.7(10)  |
| C12 | C13 | C14 | C15  | -0.2(8)   | C23' | C18' | C19' | C20' | 1.9(8)    |
| C13 | C12 | C17 | C16  | -1.1(7)   | O6   | S    | C29  | F1   | -61.1(8)  |
| C13 | C14 | C15 | C16  | -0.9(8)   | O6   | S    | C29  | F2   | 57.2(8)   |
| C14 | C15 | C16 | C17  | 1.0(8)    | O6   | S    | C29  | F3   | 176.6(7)  |
| C15 | C16 | C17 | C12  | 0.0(8)    | O7   | S    | C29  | F1   | 62.2(8)   |
| C17 | C12 | C13 | C14  | 1.2(7)    | O7   | S    | C29  | F2   | -179.5(6) |
| C18 | C5  | C6  | C7   | 158.2(4)  | O7   | S    | C29  | F3   | -60.2(8)  |
| C18 | C5  | C6  | C11  | -25.9(6)  | O8   | S    | C29  | F1   | -179.3(7) |
| C18 | C5  | C12 | C13  | 59.1(5)   | O8   | S    | C29  | F2   | -61.1(7)  |
| C18 | C5  | C12 | C17  | -122.5(5) | O8   | S    | C29  | F3   | 58.3(8)   |
| C18 | C19 | C20 | C21  | 0.8(7)    | O6S  | SS   | C29S | F1S  | -57.1(9)  |
| C19 | C18 | C23 | C22  | 0.7(7)    | O6S  | SS   | C29S | F2S  | 63.3(9)   |
| C19 | C20 | C21 | C22  | -0.9(8)   | O6S  | SS   | C29S | F3S  | -175.1(8) |
| C20 | C21 | C22 | C23  | 1.0(8)    | O7S  | SS   | C29S | F1S  | 64.6(9)   |
| C21 | C22 | C23 | C18  | -0.8(8)   | O7S  | SS   | C29S | F2S  | -175.0(8) |
| C23 | C18 | C19 | C20  | -0.7(7)   | O7S  | SS   | C29S | F3S  | -53.4(9)  |
| W'  | P'  | N1' | C1'  | -106.4(5) | O8S  | SS   | C29S | F1S  | -174.6(8) |
| W'  | P'  | N1' | C3'  | 57.9(6)   | O8S  | SS   | C29S | F2S  | -54.2(9)  |
| W'  | P'  | C5' | C6'  | 42.6(4)   | O8S  | SS   | C29S | F3S  | 67.3(9)   |
| W'  | P'  | C5' | C12' | 160.3(3)  | O6T  | ST   | C29T | F1T  | 64.3(9)   |
| W'  | P'  | C5' | C18' | -77.0(3)  | O6T  | ST   | C29T | F2T  | -59.2(9)  |
| P'  | N1' | C1' | N2'  | 166.3(4)  | O6T  | ST   | C29T | F3T  | -179.6(7) |
| P'  | N1' | C3' | C2'  | -164.7(5) | O7T  | ST   | C29T | F1T  | -55.9(9)  |
| P'  | C5' | C6' | C7'  | 46.3(5)   | O7T  | ST   | C29T | F2T  | -179.4(8) |

|     |     |      |      |           |     |     |      |     |            |
|-----|-----|------|------|-----------|-----|-----|------|-----|------------|
| P'  | C5' | C6'  | C11' | -138.1(4) | O7T | ST  | C29T | F3T | 60.2(8)    |
| P'  | C5' | C12' | C13' | -173.6(4) | O8T | ST  | C29T | F1T | -176.1(7)  |
| P'  | C5' | C12' | C17' | 3.6(7)    | O8T | ST  | C29T | F2T | 60.4(9)    |
| P'  | C5' | C18' | C19' | 69.7(5)   | O8T | ST  | C29T | F3T | -60.0(8)   |
| P'  | C5' | C18' | C23' | -106.1(5) | C30 | C31 | C32  | C33 | -161.6(12) |
| N1' | P'  | C5'  | C6'  | 172.7(3)  | C31 | C32 | C33  | C34 | -142.1(11) |
| N1' | P'  | C5'  | C12' | -69.6(4)  |     |     |      |     |            |

### Compound 11b

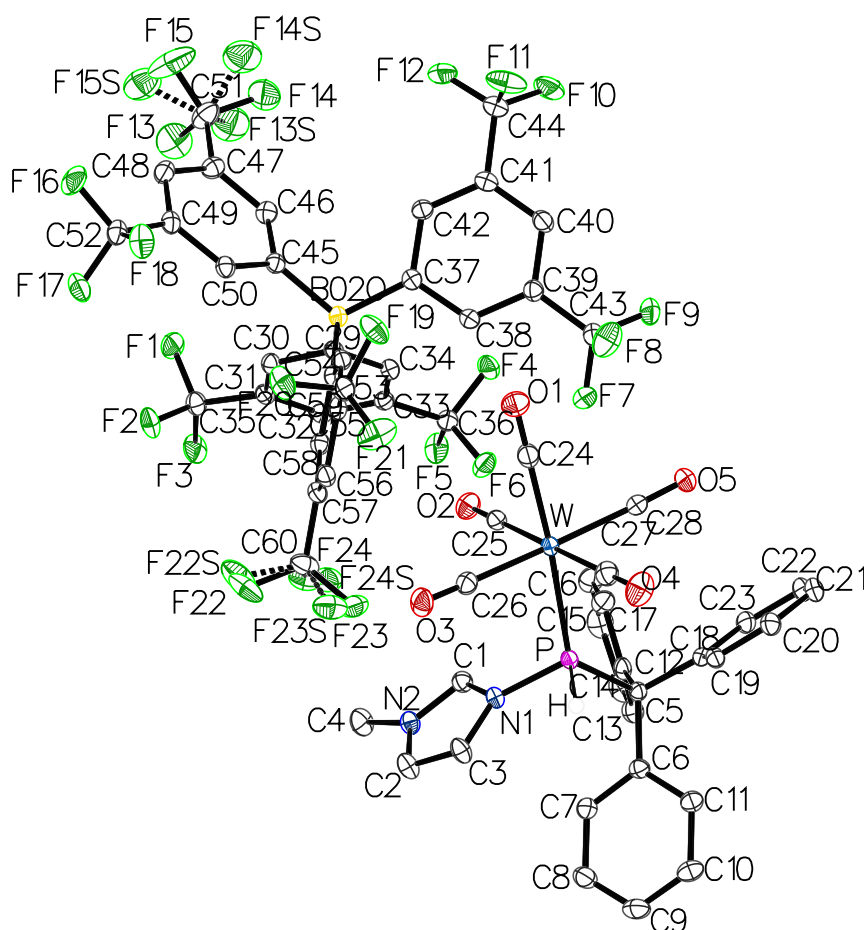

**Fig. S107** Molecular structures of **11b** in the single crystal lattice at 100(2) K. Thermal ellipsoids are set at 50% probability level. Solvent molecules and hydrogen atoms were omitted for clarity except for those bound to phosphorus atoms. Suitable single crystals were obtained as clear colourless plates by vapour diffusion of *n*-pentane into a concentrated solution of **11b** in dichloromethane at -40 °C in a glovebox. CCDC-2302950.

**Table S16** Crystal data and structure refinements for **11b**.

|                        |                                                                                                                                                      |
|------------------------|------------------------------------------------------------------------------------------------------------------------------------------------------|
| Identification code    | GSTR796, DB-604 // GXraymo_7138v                                                                                                                     |
| Crystal habitus        | clear colourless plate                                                                                                                               |
| Device type            | Bruker D8 Venture                                                                                                                                    |
| Empirical formula      | C <sub>61</sub> H <sub>36</sub> BCl <sub>2</sub> F <sub>24</sub> N <sub>2</sub> O <sub>5</sub> PW                                                    |
| Moiety formula         | C <sub>28</sub> H <sub>22</sub> N <sub>2</sub> O <sub>5</sub> PW, CH <sub>2</sub> Cl <sub>2</sub> , C <sub>32</sub> H <sub>12</sub> BF <sub>24</sub> |
| Formula weight / g/mol | 1629.45                                                                                                                                              |
| T / K                  | 100.0                                                                                                                                                |

|                                                |                                                              |
|------------------------------------------------|--------------------------------------------------------------|
| Crystal system                                 | triclinic                                                    |
| Space group                                    | $P\bar{1}$                                                   |
| $a / \text{\AA}$                               | 11.3237(5)                                                   |
| $b / \text{\AA}$                               | 14.0365(6)                                                   |
| $c / \text{\AA}$                               | 20.5226(7)                                                   |
| $\alpha / ^\circ$                              | 98.0490(10)                                                  |
| $\beta / ^\circ$                               | 104.5540(10)                                                 |
| $\gamma / ^\circ$                              | 94.751(2)                                                    |
| $V / \text{\AA}^3$                             | 3102.4(2)                                                    |
| $Z$                                            | 2                                                            |
| $\rho_{\text{calc}} / \text{g/cm}^3$           | 1.744                                                        |
| $\mu / \text{mm}^{-1}$                         | 2.097                                                        |
| $F(000)$                                       | 1600.0                                                       |
| Crystal size / $\text{mm}^3$                   | $0.22 \times 0.18 \times 0.1$                                |
| Absorption correction                          | multi-scan                                                   |
| Min. and max. transmission                     | 0.6329 and 0.7461                                            |
| Radiation                                      | Mo-K $\alpha$ ( $\lambda = 0.71073 \text{\AA}$ )             |
| $2\theta$ range for data collection / $^\circ$ | 3.884 to 55.998                                              |
| Completeness to $\theta$                       | 0.995                                                        |
| Index ranges                                   | $-14 \leq h \leq 14, -18 \leq k \leq 18, -27 \leq l \leq 27$ |
| Reflections collected                          | 89491                                                        |
| Independent reflections                        | 14911 ( $R_{\text{int}} = 0.0233, R_\sigma = 0.0189$ )       |
| Data / restraints / parameters                 | 14911 / 126 / 944                                            |
| Goodness-of-fit on $F^2$                       | 1.059                                                        |
| Final $R$ indexes ( $I \geq 2\sigma(I)$ )      | $R_1 = 0.0188, \omega R_2 = 0.0470$                          |
| Final $R$ indexes (all data)                   | $R_1 = 0.0192, \omega R_2 = 0.0473$                          |
| Largest diff. peak and hole / $\text{e/\AA}^3$ | 1.17 and $-0.71$                                             |

**Table S17** Bond lengths for **11b**.

| Atom | Atom | Length / $\text{\AA}$ | Atom | Atom | Length / $\text{\AA}$ |
|------|------|-----------------------|------|------|-----------------------|
| W    | P    | 2.4611(4)             | F13  | C51  | 1.350(3)              |
| W    | C24  | 2.0189(18)            | F13S | C51  | 1.262(11)             |
| W    | C25  | 2.0411(18)            | F14  | C51  | 1.322(3)              |
| W    | C26  | 2.0532(17)            | F14S | C51  | 1.407(12)             |
| W    | C27  | 2.0571(18)            | F15  | C51  | 1.305(3)              |
| W    | C28  | 2.0499(17)            | F15S | C51  | 1.402(12)             |
| P    | N1   | 1.7773(14)            | F16  | C52  | 1.344(2)              |
| P    | C5   | 1.9239(16)            | F17  | C52  | 1.347(2)              |
| O1   | C24  | 1.141(2)              | F18  | C52  | 1.336(2)              |
| O2   | C25  | 1.142(2)              | F19  | C59  | 1.344(2)              |
| O3   | C26  | 1.135(2)              | F20  | C59  | 1.340(2)              |
| O4   | C27  | 1.136(2)              | F21  | C59  | 1.337(2)              |
| O5   | C28  | 1.135(2)              | F22  | C60  | 1.333(4)              |
| N1   | C1   | 1.341(2)              | F22S | C60  | 1.336(7)              |

|      |     |            |      |      |          |
|------|-----|------------|------|------|----------|
| N1   | C3  | 1.390(2)   | F23  | C60  | 1.386(3) |
| N2   | C1  | 1.326(2)   | F23S | C60  | 1.305(5) |
| N2   | C2  | 1.380(2)   | F24  | C60  | 1.306(4) |
| N2   | C4  | 1.469(2)   | F24S | C60  | 1.402(7) |
| C2   | C3  | 1.350(2)   | C29  | C30  | 1.406(2) |
| C5   | C6  | 1.540(2)   | C29  | C34  | 1.397(2) |
| C5   | C12 | 1.535(2)   | C29  | B02O | 1.646(2) |
| C5   | C18 | 1.539(2)   | C30  | C31  | 1.391(2) |
| C6   | C7  | 1.404(2)   | C31  | C32  | 1.389(2) |
| C6   | C11 | 1.396(2)   | C31  | C35  | 1.496(2) |
| C7   | C8  | 1.388(2)   | C32  | C33  | 1.388(2) |
| C8   | C9  | 1.391(3)   | C33  | C34  | 1.395(2) |
| C9   | C10 | 1.386(3)   | C33  | C36  | 1.495(2) |
| C10  | C11 | 1.394(2)   | C37  | C38  | 1.406(2) |
| C12  | C13 | 1.395(2)   | C37  | C42  | 1.404(2) |
| C12  | C17 | 1.400(2)   | C37  | B02O | 1.649(2) |
| C13  | C14 | 1.398(2)   | C38  | C39  | 1.391(2) |
| C14  | C15 | 1.383(3)   | C39  | C40  | 1.391(2) |
| C15  | C16 | 1.385(3)   | C39  | C43  | 1.502(2) |
| C16  | C17 | 1.393(2)   | C40  | C41  | 1.390(2) |
| C18  | C19 | 1.399(2)   | C41  | C42  | 1.391(2) |
| C18  | C23 | 1.396(2)   | C41  | C44  | 1.501(2) |
| C19  | C20 | 1.391(2)   | C45  | C46  | 1.409(2) |
| C20  | C21 | 1.391(2)   | C45  | C50  | 1.399(2) |
| C21  | C22 | 1.383(3)   | C45  | B02O | 1.639(2) |
| C22  | C23 | 1.394(2)   | C46  | C47  | 1.387(2) |
| Cl1  | C61 | 1.756(2)   | C47  | C48  | 1.390(2) |
| Cl2  | C61 | 1.811(3)   | C47  | C51  | 1.499(2) |
| Cl2S | C61 | 1.649(4)   | C48  | C49  | 1.383(2) |
| F1   | C35 | 1.3557(19) | C49  | C50  | 1.399(2) |
| F2   | C35 | 1.3333(19) | C49  | C52  | 1.498(2) |
| F3   | C35 | 1.346(2)   | C53  | C54  | 1.408(2) |
| F4   | C36 | 1.3515(18) | C53  | C58  | 1.398(2) |
| F5   | C36 | 1.3365(19) | C53  | B02O | 1.641(2) |
| F6   | C36 | 1.3429(19) | C54  | C55  | 1.391(2) |
| F7   | C43 | 1.336(2)   | C55  | C56  | 1.391(2) |
| F8   | C43 | 1.342(2)   | C55  | C59  | 1.493(2) |
| F9   | C43 | 1.337(2)   | C56  | C57  | 1.386(2) |
| F10  | C44 | 1.336(2)   | C57  | C58  | 1.395(2) |
| F11  | C44 | 1.346(2)   | C57  | C60  | 1.495(2) |
| F12  | C44 | 1.331(2)   |      |      |          |

**Table S18** Bond angles for **11b**.

| Atom | Atom | Atom | Angle / ° | Atom | Atom | Atom | Angle / °  |
|------|------|------|-----------|------|------|------|------------|
| C24  | W    | P    | 175.92(5) | C42  | C37  | C38  | 115.62(14) |

|     |     |     |            |      |     |      |            |
|-----|-----|-----|------------|------|-----|------|------------|
| C24 | W   | C25 | 89.46(7)   | C42  | C37 | B020 | 124.54(14) |
| C24 | W   | C26 | 87.50(7)   | C39  | C38 | C37  | 122.34(14) |
| C24 | W   | C27 | 91.99(7)   | C38  | C39 | C43  | 120.23(14) |
| C24 | W   | C28 | 88.56(7)   | C40  | C39 | C38  | 121.06(15) |
| C25 | W   | P   | 90.50(5)   | C40  | C39 | C43  | 118.67(14) |
| C25 | W   | C26 | 93.23(6)   | C41  | C40 | C39  | 117.50(15) |
| C25 | W   | C27 | 177.82(7)  | C40  | C41 | C42  | 121.49(15) |
| C25 | W   | C28 | 92.00(7)   | C40  | C41 | C44  | 117.80(15) |
| C26 | W   | P   | 88.43(5)   | C42  | C41 | C44  | 120.68(15) |
| C26 | W   | C27 | 88.46(7)   | C41  | C42 | C37  | 121.97(15) |
| C27 | W   | P   | 88.17(5)   | F7   | C43 | F8   | 106.27(15) |
| C28 | W   | P   | 95.52(5)   | F7   | C43 | F9   | 106.78(15) |
| C28 | W   | C26 | 173.42(7)  | F7   | C43 | C39  | 112.62(14) |
| C28 | W   | C27 | 86.41(7)   | F8   | C43 | C39  | 111.84(15) |
| N1  | P   | W   | 113.30(5)  | F9   | C43 | F8   | 106.11(14) |
| N1  | P   | C5  | 102.46(7)  | F9   | C43 | C39  | 112.75(14) |
| C5  | P   | W   | 130.29(5)  | F10  | C44 | F11  | 106.07(15) |
| C1  | N1  | P   | 127.59(11) | F10  | C44 | C41  | 112.31(15) |
| C1  | N1  | C3  | 107.73(13) | F11  | C44 | C41  | 111.48(15) |
| C3  | N1  | P   | 124.68(11) | F12  | C44 | F10  | 107.16(15) |
| C1  | N2  | C2  | 108.85(14) | F12  | C44 | F11  | 106.05(16) |
| C1  | N2  | C4  | 125.66(15) | F12  | C44 | C41  | 113.30(15) |
| C2  | N2  | C4  | 125.49(14) | C46  | C45 | B020 | 119.96(14) |
| N2  | C1  | N1  | 108.94(14) | C50  | C45 | C46  | 115.77(14) |
| C3  | C2  | N2  | 107.12(14) | C50  | C45 | B020 | 124.13(14) |
| C2  | C3  | N1  | 107.35(15) | C47  | C46 | C45  | 122.20(15) |
| C6  | C5  | P   | 106.51(10) | C46  | C47 | C48  | 120.92(15) |
| C12 | C5  | P   | 110.44(10) | C46  | C47 | C51  | 119.93(15) |
| C12 | C5  | C6  | 112.87(13) | C48  | C47 | C51  | 119.12(15) |
| C12 | C5  | C18 | 111.16(12) | C49  | C48 | C47  | 118.11(15) |
| C18 | C5  | P   | 102.01(10) | C48  | C49 | C50  | 120.99(15) |
| C18 | C5  | C6  | 113.18(12) | C48  | C49 | C52  | 120.11(15) |
| C7  | C6  | C5  | 120.60(14) | C50  | C49 | C52  | 118.82(15) |
| C11 | C6  | C5  | 121.70(14) | C45  | C50 | C49  | 121.98(15) |
| C11 | C6  | C7  | 117.68(14) | F13  | C51 | C47  | 110.90(17) |
| C8  | C7  | C6  | 121.27(16) | F13S | C51 | F14S | 96.0(7)    |
| C7  | C8  | C9  | 120.18(16) | F13S | C51 | F15S | 113.7(7)   |
| C10 | C9  | C8  | 119.30(16) | F13S | C51 | C47  | 121.4(5)   |
| C9  | C10 | C11 | 120.46(16) | F14  | C51 | F13  | 103.25(17) |
| C10 | C11 | C6  | 121.00(16) | F14  | C51 | C47  | 112.85(16) |
| C13 | C12 | C5  | 121.53(14) | F14S | C51 | C47  | 111.9(5)   |
| C13 | C12 | C17 | 118.24(15) | F15  | C51 | F13  | 107.7(2)   |
| C17 | C12 | C5  | 120.05(15) | F15  | C51 | F14  | 108.6(2)   |
| C12 | C13 | C14 | 120.48(16) | F15  | C51 | C47  | 113.04(17) |
| C15 | C14 | C13 | 120.57(17) | F15S | C51 | F14S | 95.5(7)    |
| C14 | C15 | C16 | 119.58(17) | F15S | C51 | C47  | 113.4(5)   |

|      |     |      |            |      |      |      |            |
|------|-----|------|------------|------|------|------|------------|
| C15  | C16 | C17  | 120.13(17) | F16  | C52  | F17  | 106.06(13) |
| C16  | C17 | C12  | 120.95(17) | F16  | C52  | C49  | 112.54(14) |
| C19  | C18 | C5   | 120.23(13) | F17  | C52  | C49  | 112.04(14) |
| C23  | C18 | C5   | 121.60(14) | F18  | C52  | F16  | 107.09(14) |
| C23  | C18 | C19  | 118.15(15) | F18  | C52  | F17  | 105.65(14) |
| C20  | C19 | C18  | 121.32(15) | F18  | C52  | C49  | 112.94(13) |
| C21  | C20 | C19  | 119.74(16) | C54  | C53  | B02O | 119.65(13) |
| C22  | C21 | C20  | 119.59(16) | C58  | C53  | C54  | 115.96(14) |
| C21  | C22 | C23  | 120.71(16) | C58  | C53  | B02O | 124.39(14) |
| C22  | C23 | C18  | 120.47(16) | C55  | C54  | C53  | 122.22(14) |
| O1   | C24 | W    | 178.51(17) | C54  | C55  | C59  | 120.97(15) |
| O2   | C25 | W    | 178.37(15) | C56  | C55  | C54  | 120.74(15) |
| O3   | C26 | W    | 176.56(16) | C56  | C55  | C59  | 118.21(14) |
| O4   | C27 | W    | 178.25(16) | C57  | C56  | C55  | 117.97(15) |
| O5   | C28 | W    | 175.77(16) | C56  | C57  | C58  | 121.28(15) |
| Cl1  | C61 | Cl2  | 108.03(16) | C56  | C57  | C60  | 118.06(15) |
| Cl2S | C61 | Cl1  | 119.7(2)   | C58  | C57  | C60  | 120.66(15) |
| C30  | C29 | B02O | 120.51(13) | C57  | C58  | C53  | 121.82(15) |
| C34  | C29 | C30  | 115.53(14) | F19  | C59  | C55  | 113.10(14) |
| C34  | C29 | B02O | 123.91(13) | F20  | C59  | F19  | 105.89(14) |
| C31  | C30 | C29  | 122.30(14) | F20  | C59  | C55  | 111.88(14) |
| C30  | C31 | C35  | 118.70(14) | F21  | C59  | F19  | 106.44(14) |
| C32  | C31 | C30  | 121.20(14) | F21  | C59  | F20  | 105.95(14) |
| C32  | C31 | C35  | 120.04(14) | F21  | C59  | C55  | 113.02(14) |
| C33  | C32 | C31  | 117.47(14) | F22  | C60  | F23  | 106.4(2)   |
| C32  | C33 | C34  | 121.23(14) | F22  | C60  | C57  | 113.8(2)   |
| C32  | C33 | C36  | 120.78(14) | F22S | C60  | F24S | 107.1(4)   |
| C34  | C33 | C36  | 117.99(14) | F22S | C60  | C57  | 109.5(3)   |
| C33  | C34 | C29  | 122.27(14) | F23  | C60  | C57  | 111.27(17) |
| F1   | C35 | C31  | 111.67(13) | F23S | C60  | F22S | 104.7(3)   |
| F2   | C35 | F1   | 105.88(13) | F23S | C60  | F24S | 110.5(4)   |
| F2   | C35 | F3   | 107.22(13) | F23S | C60  | C57  | 113.8(2)   |
| F2   | C35 | C31  | 113.47(13) | F24  | C60  | F22  | 104.9(2)   |
| F3   | C35 | F1   | 105.18(13) | F24  | C60  | F23  | 104.4(2)   |
| F3   | C35 | C31  | 112.83(14) | F24  | C60  | C57  | 115.3(2)   |
| F4   | C36 | C33  | 111.94(13) | F24S | C60  | C57  | 110.8(3)   |
| F5   | C36 | F4   | 106.30(13) | C29  | B02O | C37  | 109.71(12) |
| F5   | C36 | F6   | 106.78(13) | C45  | B02O | C29  | 107.09(12) |
| F5   | C36 | C33  | 113.31(13) | C45  | B02O | C37  | 112.21(13) |
| F6   | C36 | F4   | 105.35(13) | C45  | B02O | C53  | 110.96(12) |
| F6   | C36 | C33  | 112.59(13) | C53  | B02O | C29  | 109.59(12) |
| C38  | C37 | B02O | 119.82(13) | C53  | B02O | C37  | 107.28(12) |

## Compound 11c

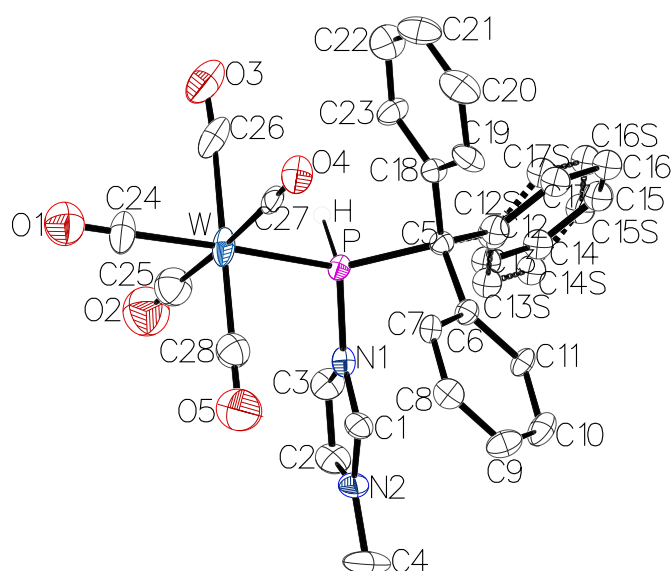

**Fig. S108** Molecular structures of **11c** in the single crystal lattice at 100(2) K. Thermal ellipsoids are set at 50% probability level. Hydrogen atoms and the squeezed misordered  $[Al(OC(CF_3)_3)_4]^-$  anion were omitted for clarity except for those bound to phosphorus atoms. Suitable single crystals were obtained as clear colourless blocks by vapour diffusion of *n*-pentane into a concentrated solution of **11c** in dichloromethane at  $-40\text{ }^\circ\text{C}$  in a glovebox. CCDC-2302951.

**Table S19** Crystal data and structure refinements for **11c**.

|                                   |                                  |
|-----------------------------------|----------------------------------|
| Identification code               | GSTR789, DB-568 // GXraymo_7046f |
| Crystal habitus                   | clear colourless block           |
| Device type                       | Bruker D8 Venture                |
| Empirical formula                 | $C_{28}H_{22}N_2O_5PW$           |
| Moiety formula                    | $C_{28}H_{22}N_2O_5PW$           |
| Formula weight / g/mol            | 681.29                           |
| <i>T</i> / K                      | 100.0                            |
| Crystal system                    | monoclinic                       |
| Space group                       | $P2_1/n$                         |
| <i>a</i> / Å                      | 9.9563(5)                        |
| <i>b</i> / Å                      | 34.958(2)                        |
| <i>c</i> / Å                      | 16.3809(13)                      |
| $\alpha$ / °                      | 90                               |
| $\beta$ / °                       | 97.490(2)                        |
| $\gamma$ / °                      | 90                               |
| <i>V</i> / Å <sup>3</sup>         | 5652.8(6)                        |
| <i>Z</i>                          | 4                                |
| $\rho_{calc}$ / g/cm <sup>3</sup> | 0.801                            |
| $\mu$ / mm <sup>-1</sup>          | 2.091                            |
| <i>F</i> (000)                    | 1322.0                           |
| Crystal size / mm <sup>3</sup>    | 0.12 × 0.09 × 0.05               |
| Absorption correction             | multi-scan                       |
| Min. and max. transmission        | 0.6491 and 0.7461                |



|                                                |                                                                    |
|------------------------------------------------|--------------------------------------------------------------------|
| Radiation                                      | Mo-K $\alpha$ ( $\lambda = 0.71073$ Å)                             |
| 2 $\theta$ range for data collection / °       | 4.288 to 55.998                                                    |
| Completeness to $\theta$                       | 0.998                                                              |
| Index ranges                                   | $-12 \leq h \leq 13$ , $-46 \leq k \leq 46$ , $-21 \leq l \leq 21$ |
| Reflections collected                          | 137230                                                             |
| Independent reflections                        | 13629 ( $R_{int} = 0.0502$ , $R_{\sigma} = 0.0241$ )               |
| Data / restraints / parameters                 | 13629 / 268 / 369                                                  |
| Goodness-of-fit on $F^2$                       | 1.032                                                              |
| Final $R$ indexes ( $I \geq 2\sigma(I)$ )      | $R_1 = 0.0824$ , $\omega R_2 = 0.2406$                             |
| Final $R$ indexes (all data)                   | $R_1 = 0.0870$ , $\omega R_2 = 0.2447$                             |
| Largest diff. peak and hole / e/Å <sup>3</sup> | 2.27 and -1.88                                                     |

**Table S20** Bond lengths for **11c**.

| Atom | Atom | Length / Å | Atom | Atom | Length / Å |
|------|------|------------|------|------|------------|
| W    | P    | 2.4643(17) | C6   | C11  | 1.398(9)   |
| W    | C24  | 2.023(9)   | C7   | C8   | 1.382(10)  |
| W    | C25  | 2.012(11)  | C8   | C9   | 1.399(11)  |
| W    | C26  | 2.113(10)  | C9   | C10  | 1.388(12)  |
| W    | C27  | 2.051(8)   | C10  | C11  | 1.422(11)  |
| W    | C28  | 2.013(10)  | C12  | C17  | 1.3900     |
| P    | N1   | 1.784(6)   | C12  | C13  | 1.3900     |
| P    | C5   | 1.923(7)   | C17  | C16  | 1.3900     |
| O1   | C24  | 1.153(12)  | C16  | C15  | 1.3900     |
| O2   | C25  | 1.158(14)  | C15  | C14  | 1.3900     |
| O3   | C26  | 1.083(12)  | C14  | C13  | 1.3900     |
| O4   | C27  | 1.145(10)  | C16S | C15S | 1.3900     |
| O5   | C28  | 1.166(13)  | C16S | C17S | 1.3900     |
| N1   | C1   | 1.352(9)   | C15S | C14S | 1.3900     |
| N1   | C3   | 1.398(9)   | C14S | C13S | 1.3900     |
| N2   | C1   | 1.331(9)   | C13S | C12S | 1.3900     |
| N2   | C2   | 1.409(11)  | C12S | C17S | 1.3900     |
| N2   | C4   | 1.451(11)  | C18  | C19  | 1.373(10)  |
| C2   | C3   | 1.325(11)  | C18  | C23  | 1.413(9)   |
| C5   | C6   | 1.555(9)   | C19  | C20  | 1.409(12)  |
| C5   | C12  | 1.534(10)  | C20  | C21  | 1.355(14)  |
| C5   | C12S | 1.586(10)  | C21  | C22  | 1.334(13)  |
| C5   | C18  | 1.501(9)   | C22  | C23  | 1.411(12)  |
| C6   | C7   | 1.409(9)   |      |      |            |

**Table S21** Bond angles for **11c**.

| Atom | Atom | Atom | Angle / ° | Atom | Atom | Atom | Angle / ° |
|------|------|------|-----------|------|------|------|-----------|
| C24  | W    | P    | 174.0(3)  | C11  | C6   | C5   | 121.6(6)  |
| C24  | W    | C26  | 89.7(4)   | C11  | C6   | C7   | 117.7(6)  |
| C24  | W    | C27  | 87.4(3)   | C8   | C7   | C6   | 120.9(6)  |
| C25  | W    | P    | 82.5(3)   | C7   | C8   | C9   | 120.7(7)  |
| C25  | W    | C24  | 91.5(4)   | C10  | C9   | C8   | 120.4(7)  |
| C25  | W    | C26  | 87.5(4)   | C9   | C10  | C11  | 118.2(7)  |
| C25  | W    | C27  | 176.5(4)  | C6   | C11  | C10  | 122.0(6)  |
| C25  | W    | C28  | 93.0(4)   | C17  | C12  | C5   | 114.6(7)  |
| C26  | W    | P    | 89.3(2)   | C17  | C12  | C13  | 120.0     |
| C27  | W    | P    | 98.6(2)   | C13  | C12  | C5   | 125.4(7)  |
| C27  | W    | C26  | 89.2(3)   | C12  | C17  | C16  | 120.0     |
| C28  | W    | P    | 90.9(3)   | C15  | C16  | C17  | 120.0     |
| C28  | W    | C24  | 90.1(4)   | C16  | C15  | C14  | 120.0     |
| C28  | W    | C26  | 179.5(4)  | C15  | C14  | C13  | 120.0     |
| C28  | W    | C27  | 90.3(4)   | C14  | C13  | C12  | 120.0     |
| N1   | P    | W    | 111.5(2)  | C15S | C16S | C17S | 120.0     |
| N1   | P    | C5   | 105.2(3)  | C14S | C15S | C16S | 120.0     |
| C5   | P    | W    | 127.4(2)  | C15S | C14S | C13S | 120.0     |
| C1   | N1   | P    | 127.0(5)  | C12S | C13S | C14S | 120.0     |
| C1   | N1   | C3   | 106.8(6)  | C13S | C12S | C5   | 122.9(7)  |
| C3   | N1   | P    | 126.1(5)  | C13S | C12S | C17S | 120.0     |
| C1   | N2   | C2   | 108.0(6)  | C17S | C12S | C5   | 117.1(7)  |
| C1   | N2   | C4   | 123.9(7)  | C12S | C17S | C16S | 120.0     |
| C2   | N2   | C4   | 128.2(7)  | C19  | C18  | C5   | 123.5(6)  |
| N2   | C1   | N1   | 109.4(6)  | C19  | C18  | C23  | 119.6(7)  |
| C3   | C2   | N2   | 107.0(7)  | C23  | C18  | C5   | 116.8(6)  |
| C2   | C3   | N1   | 108.9(7)  | C18  | C19  | C20  | 119.4(8)  |
| C6   | C5   | P    | 103.5(4)  | C21  | C20  | C19  | 121.4(8)  |
| C6   | C5   | C12S | 111.4(6)  | C22  | C21  | C20  | 119.3(8)  |
| C12  | C5   | P    | 114.3(6)  | C21  | C22  | C23  | 122.8(9)  |
| C12  | C5   | C6   | 111.5(7)  | C22  | C23  | C18  | 117.5(7)  |
| C12S | C5   | P    | 110.0(6)  | O1   | C24  | W    | 179.0(10) |
| C18  | C5   | P    | 103.9(4)  | O2   | C25  | W    | 177.7(10) |
| C18  | C5   | C6   | 114.4(5)  | O3   | C26  | W    | 176.3(9)  |
| C18  | C5   | C12  | 109.0(6)  | O4   | C27  | W    | 177.1(7)  |
| C18  | C5   | C12S | 112.9(6)  | O5   | C28  | W    | 178.0(9)  |
| C7   | C6   | C5   | 120.6(6)  |      |      |      |           |

## Compound 12

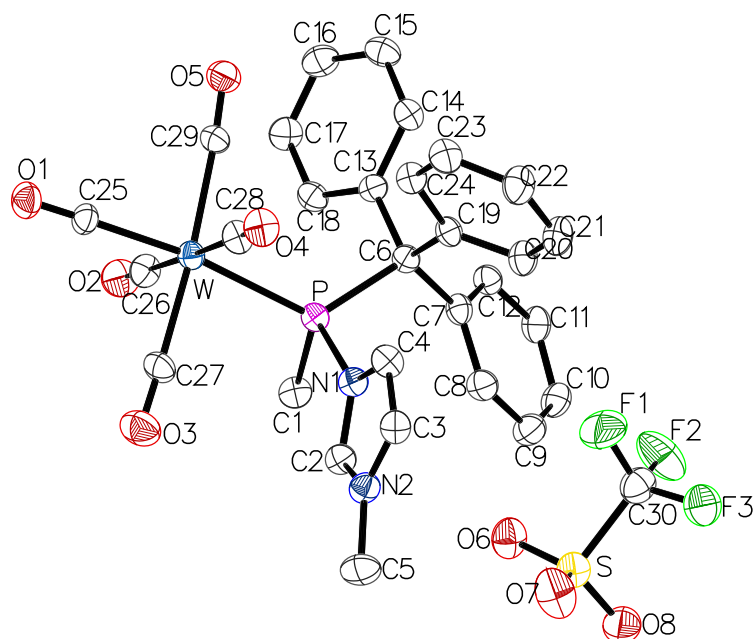

**Fig. S109** Molecular structures of **12** in the single crystal lattice at 123(2) K. Thermal ellipsoids are set at 50% probability level. Hydrogen atoms and solvent molecules were omitted for clarity. Suitable single crystals were obtained as clear colourless blocks by vapour diffusion of *n*-pentane into a concentrated solution of **12** in dichloromethane at  $-40\text{ }^{\circ}\text{C}$  in a glovebox. CCDC-2302952.

**Table S22** Crystal data and structure refinements for **12**.

|                                      |                                                                                                                        |
|--------------------------------------|------------------------------------------------------------------------------------------------------------------------|
| Identification code                  | GSTR763, DB-519 // GXray6876                                                                                           |
| Crystal habitus                      | clear colourless block                                                                                                 |
| Device type                          | STOE IPDS-2T                                                                                                           |
| Empirical formula                    | $\text{C}_{31}\text{H}_{26}\text{Cl}_2\text{F}_3\text{N}_2\text{O}_8\text{PSW}$                                        |
| Moiety formula                       | $\text{C}_{29}\text{H}_{24}\text{N}_2\text{O}_5\text{PW}$ , $\text{CF}_3\text{O}_3\text{S}$ , $\text{CH}_2\text{Cl}_2$ |
| Formula weight / g/mol               | 929.32                                                                                                                 |
| $T / \text{K}$                       | 123(2)                                                                                                                 |
| Crystal system                       | triclinic                                                                                                              |
| Space group                          | $P\bar{1}$                                                                                                             |
| $a / \text{\AA}$                     | 9.1342(3)                                                                                                              |
| $b / \text{\AA}$                     | 10.5960(4)                                                                                                             |
| $c / \text{\AA}$                     | 18.7994(6)                                                                                                             |
| $\alpha / ^{\circ}$                  | 87.804(3)                                                                                                              |
| $\beta / ^{\circ}$                   | 79.701(3)                                                                                                              |
| $\gamma / ^{\circ}$                  | 77.720(3)                                                                                                              |
| $V / \text{\AA}^3$                   | 1749.24(11)                                                                                                            |
| $Z$                                  | 2                                                                                                                      |
| $\rho_{\text{calc}} / \text{g/cm}^3$ | 1.764                                                                                                                  |
| $\mu / \text{mm}^{-1}$               | 3.627                                                                                                                  |
| $F(000)$                             | 912.0                                                                                                                  |
| Crystal size / $\text{mm}^3$         | $0.12 \times 0.09 \times 0.06$                                                                                         |
| Absorption correction                | multi-scan                                                                                                             |
| Min. and max. transmission           | 0.0000 and 0.0000                                                                                                      |

|                                                |                                                              |
|------------------------------------------------|--------------------------------------------------------------|
| Radiation                                      | Mo-K $\alpha$ ( $\lambda = 0.71073$ Å)                       |
| 2 $\theta$ range for data collection / °       | 3.934 to 56                                                  |
| Completeness to $\theta$                       | 0.999                                                        |
| Index ranges                                   | $-12 \leq h \leq 12, -13 \leq k \leq 13, -24 \leq l \leq 24$ |
| Reflections collected                          | 44205                                                        |
| Independent reflections                        | 44205 ( $R_{int} = 0.0711, R_{\sigma} = 0.0591$ )            |
| Data / restraints / parameters                 | 44205 / 0 / 448                                              |
| Goodness-of-fit on $F^2$                       | 0.991                                                        |
| Final $R$ indexes ( $I \geq 2\sigma(I)$ )      | $R_1 = 0.0586, \omega R_2 = 0.1512$                          |
| Final $R$ indexes (all data)                   | $R_1 = 0.0771, \omega R_2 = 0.1631$                          |
| Largest diff. peak and hole / e/Å <sup>3</sup> | 1.45 and -2.11                                               |

**Table S23** Bond lengths for **12**.

| Atom | Atom | Length / Å | Atom | Atom | Length / Å |
|------|------|------------|------|------|------------|
| W    | P    | 2.4996(19) | C8   | C9   | 1.375(10)  |
| W    | C25  | 2.022(7)   | C9   | C10  | 1.388(11)  |
| W    | C26  | 2.050(7)   | C10  | C11  | 1.382(11)  |
| W    | C27  | 2.046(8)   | C11  | C12  | 1.388(10)  |
| W    | C28  | 2.068(7)   | C13  | C14  | 1.395(10)  |
| W    | C29  | 2.083(7)   | C13  | C18  | 1.391(10)  |
| P    | N1   | 1.801(6)   | C14  | C15  | 1.388(10)  |
| P    | C1   | 1.837(7)   | C15  | C16  | 1.387(11)  |
| P    | C6   | 1.947(7)   | C16  | C17  | 1.383(11)  |
| O1   | C25  | 1.117(9)   | C17  | C18  | 1.389(10)  |
| O2   | C26  | 1.128(9)   | C19  | C20  | 1.385(10)  |
| O3   | C27  | 1.119(10)  | C19  | C24  | 1.407(10)  |
| O4   | C28  | 1.120(9)   | C20  | C21  | 1.395(11)  |
| O5   | C29  | 1.108(9)   | C21  | C22  | 1.392(11)  |
| N1   | C2   | 1.335(9)   | C22  | C23  | 1.383(11)  |
| N1   | C4   | 1.389(9)   | C23  | C24  | 1.387(10)  |
| N2   | C2   | 1.321(9)   | S    | O6   | 1.437(6)   |
| N2   | C3   | 1.380(10)  | S    | O7   | 1.432(7)   |
| N2   | C5   | 1.457(10)  | S    | O8   | 1.447(7)   |
| C3   | C4   | 1.344(11)  | S    | C30  | 1.824(10)  |
| C6   | C7   | 1.538(9)   | F1   | C30  | 1.315(10)  |
| C6   | C13  | 1.544(9)   | F2   | C30  | 1.324(11)  |
| C6   | C19  | 1.542(9)   | F3   | C30  | 1.334(10)  |
| C7   | C8   | 1.406(10)  | Cl1  | C31  | 1.766(12)  |
| C7   | C12  | 1.394(10)  | Cl2  | C31  | 1.748(13)  |

**Table S24** Bond angles for **12**.

| Atom | Atom | Atom | Angle / ° | Atom | Atom | Atom | Angle / ° |
|------|------|------|-----------|------|------|------|-----------|
| C25  | W    | P    | 172.7(2)  | C9   | C8   | C7   | 120.6(7)  |
| C25  | W    | C26  | 89.6(3)   | C8   | C9   | C10  | 120.9(7)  |
| C25  | W    | C27  | 88.3(3)   | C11  | C10  | C9   | 119.3(7)  |
| C25  | W    | C28  | 90.0(3)   | C10  | C11  | C12  | 120.1(7)  |
| C25  | W    | C29  | 88.0(3)   | C11  | C12  | C7   | 121.1(7)  |
| C26  | W    | P    | 88.2(2)   | C14  | C13  | C6   | 120.3(6)  |
| C26  | W    | C28  | 178.8(3)  | C18  | C13  | C6   | 121.7(6)  |
| C26  | W    | C29  | 88.3(3)   | C18  | C13  | C14  | 117.7(6)  |
| C27  | W    | P    | 84.8(2)   | C15  | C14  | C13  | 120.8(7)  |
| C27  | W    | C26  | 90.2(3)   | C16  | C15  | C14  | 120.6(7)  |
| C27  | W    | C28  | 91.0(3)   | C17  | C16  | C15  | 119.2(7)  |
| C27  | W    | C29  | 176.0(3)  | C16  | C17  | C18  | 119.9(7)  |
| C28  | W    | P    | 92.3(2)   | C17  | C18  | C13  | 121.7(7)  |
| C28  | W    | C29  | 90.5(3)   | C20  | C19  | C6   | 122.8(6)  |
| C29  | W    | P    | 98.9(2)   | C20  | C19  | C24  | 118.3(7)  |
| N1   | P    | W    | 109.4(2)  | C24  | C19  | C6   | 118.9(6)  |
| N1   | P    | C1   | 97.1(3)   | C19  | C20  | C21  | 121.0(7)  |
| N1   | P    | C6   | 104.6(3)  | C22  | C21  | C20  | 119.9(7)  |
| C1   | P    | W    | 111.5(3)  | C23  | C22  | C21  | 119.9(7)  |
| C1   | P    | C6   | 106.3(3)  | C22  | C23  | C24  | 120.1(7)  |
| C6   | P    | W    | 124.3(2)  | C23  | C24  | C19  | 120.8(7)  |
| C2   | N1   | P    | 124.6(5)  | O1   | C25  | W    | 178.7(7)  |
| C2   | N1   | C4   | 107.0(6)  | O2   | C26  | W    | 178.6(7)  |
| C4   | N1   | P    | 127.4(5)  | O3   | C27  | W    | 177.9(8)  |
| C2   | N2   | C3   | 108.2(6)  | O4   | C28  | W    | 178.7(7)  |
| C2   | N2   | C5   | 126.2(7)  | O5   | C29  | W    | 176.2(7)  |
| C3   | N2   | C5   | 125.7(7)  | O6   | S    | O8   | 114.4(4)  |
| N2   | C2   | N1   | 110.0(7)  | O6   | S    | C30  | 103.4(4)  |
| C4   | C3   | N2   | 107.2(7)  | O7   | S    | O6   | 115.5(4)  |
| C3   | C4   | N1   | 107.7(7)  | O7   | S    | O8   | 114.4(5)  |
| C7   | C6   | P    | 111.7(5)  | O7   | S    | C30  | 103.3(4)  |
| C7   | C6   | C13  | 110.6(6)  | O8   | S    | C30  | 103.6(4)  |
| C7   | C6   | C19  | 111.8(6)  | F1   | C30  | S    | 111.7(7)  |
| C13  | C6   | P    | 106.0(5)  | F1   | C30  | F2   | 108.1(8)  |
| C19  | C6   | P    | 105.3(5)  | F1   | C30  | F3   | 107.0(7)  |
| C19  | C6   | C13  | 111.1(6)  | F2   | C30  | S    | 111.6(6)  |
| C8   | C7   | C6   | 121.6(6)  | F2   | C30  | F3   | 107.2(8)  |
| C12  | C7   | C6   | 120.5(6)  | F3   | C30  | S    | 111.1(6)  |
| C12  | C7   | C8   | 117.9(7)  | Cl2  | C31  | Cl1  | 112.0(6)  |

**Table S25** Torsion angles for **12**.

| <b>A</b> | <b>B</b> | <b>C</b> | <b>D</b> | <b>Angle / °</b> | <b>A</b> | <b>B</b> | <b>C</b> | <b>D</b> | <b>Angle / °</b> |
|----------|----------|----------|----------|------------------|----------|----------|----------|----------|------------------|
| W        | P        | N1       | C2       | 96.0(6)          | C8       | C9       | C10      | C11      | 1.4(12)          |
| W        | P        | N1       | C4       | -71.1(7)         | C9       | C10      | C11      | C12      | -2.1(12)         |
| P        | N1       | C2       | N2       | -169.2(5)        | C10      | C11      | C12      | C7       | 0.5(11)          |
| P        | N1       | C4       | C3       | 169.8(5)         | C12      | C7       | C8       | C9       | -2.4(11)         |
| P        | C6       | C7       | C8       | -48.2(8)         | C13      | C6       | C7       | C8       | -166.0(7)        |
| P        | C6       | C7       | C12      | 133.9(6)         | C13      | C6       | C7       | C12      | 16.1(9)          |
| P        | C6       | C13      | C14      | 140.5(6)         | C13      | C6       | C19      | C20      | -131.3(7)        |
| P        | C6       | C13      | C18      | -45.3(8)         | C13      | C6       | C19      | C24      | 49.1(9)          |
| P        | C6       | C19      | C20      | 114.3(7)         | C13      | C14      | C15      | C16      | 0.4(12)          |
| P        | C6       | C19      | C24      | -65.2(7)         | C14      | C13      | C18      | C17      | -2.7(11)         |
| N2       | C3       | C4       | N1       | -1.4(9)          | C14      | C15      | C16      | C17      | -1.4(12)         |
| C1       | P        | N1       | C2       | -19.8(7)         | C15      | C16      | C17      | C18      | 0.4(12)          |
| C1       | P        | N1       | C4       | 173.1(7)         | C16      | C17      | C18      | C13      | 1.7(12)          |
| C2       | N1       | C4       | C3       | 0.8(9)           | C18      | C13      | C14      | C15      | 1.6(11)          |
| C2       | N2       | C3       | C4       | 1.5(9)           | C19      | C6       | C7       | C8       | 69.6(8)          |
| C3       | N2       | C2       | N1       | -1.0(9)          | C19      | C6       | C7       | C12      | -108.3(7)        |
| C4       | N1       | C2       | N2       | 0.1(8)           | C19      | C6       | C13      | C14      | 26.5(9)          |
| C5       | N2       | C2       | N1       | 180.0(7)         | C19      | C6       | C13      | C18      | -159.3(6)        |
| C5       | N2       | C3       | C4       | -179.5(7)        | C19      | C20      | C21      | C22      | -1.1(13)         |
| C6       | P        | N1       | C2       | -128.8(6)        | C20      | C19      | C24      | C23      | -4.0(11)         |
| C6       | P        | N1       | C4       | 64.1(7)          | C20      | C21      | C22      | C23      | -1.1(14)         |
| C6       | C7       | C8       | C9       | 179.7(7)         | C21      | C22      | C23      | C24      | 0.6(13)          |
| C6       | C7       | C12      | C11      | 179.6(6)         | C22      | C23      | C24      | C19      | 2.0(12)          |
| C6       | C13      | C14      | C15      | 176.0(7)         | C24      | C19      | C20      | C21      | 3.6(12)          |
| C6       | C13      | C18      | C17      | -177.0(7)        | O6       | S        | C30      | F1       | 61.5(7)          |
| C6       | C19      | C20      | C21      | -176.0(7)        | O6       | S        | C30      | F2       | -59.5(7)         |
| C6       | C19      | C24      | C23      | 175.5(7)         | O6       | S        | C30      | F3       | -179.1(6)        |
| C7       | C6       | C13      | C14      | -98.2(8)         | O7       | S        | C30      | F1       | -59.2(7)         |
| C7       | C6       | C13      | C18      | 75.9(8)          | O7       | S        | C30      | F2       | 179.8(7)         |
| C7       | C6       | C19      | C20      | -7.2(10)         | O7       | S        | C30      | F3       | 60.2(7)          |
| C7       | C6       | C19      | C24      | 173.2(6)         | O8       | S        | C30      | F1       | -178.8(7)        |
| C7       | C8       | C9       | C10      | 0.8(12)          | O8       | S        | C30      | F2       | 60.1(7)          |
| C8       | C7       | C12      | C11      | 1.7(11)          | O8       | S        | C30      | F3       | -59.5(7)         |

## Compound 12-Cr

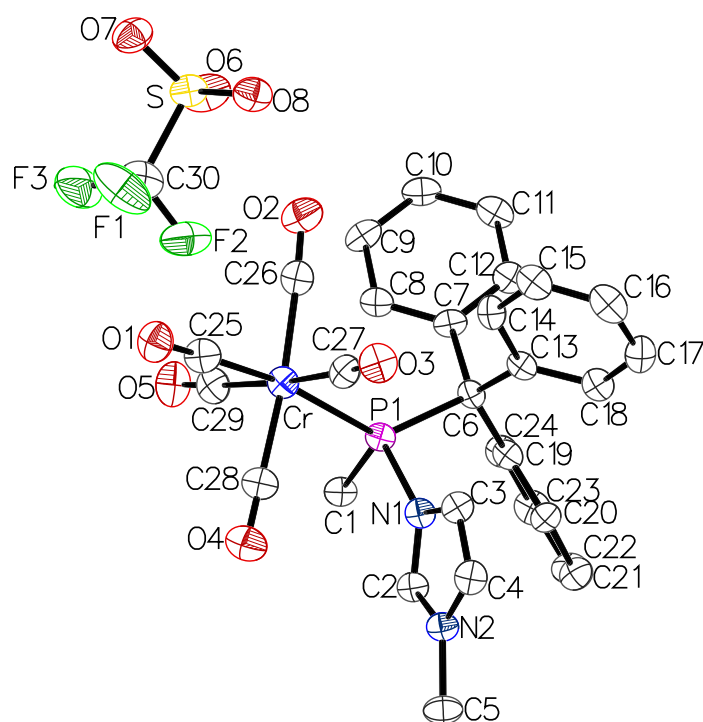

**Fig. S110** Molecular structures of **12-Cr** in the single crystal lattice at 100(2) K. Thermal ellipsoids are set at 50% probability level. Hydrogen atoms and solvent molecules were omitted for clarity. Suitable single crystals were obtained as clear colourless needles by liquid-liquid diffusion of 0.3 mL of *n*-pentane layered on top of a solution of 1.7 mg of **12-Cr** in 0.3 mL of dichloromethane at  $-40\text{ }^{\circ}\text{C}$  in a glovebox. CCDC-2302953.

**Table S26** Crystal data and structure refinements for **12-Cr**.

|                                      |                                                                                                                         |
|--------------------------------------|-------------------------------------------------------------------------------------------------------------------------|
| Identification code                  | GSTR773, DB-558 // GXray6925                                                                                            |
| Crystal habitus                      | clear colourless needle                                                                                                 |
| Device type                          | Stadivari                                                                                                               |
| Empirical formula                    | $\text{C}_{31}\text{H}_{26}\text{Cl}_2\text{CrF}_3\text{N}_2\text{O}_8\text{PS}$                                        |
| Moiety formula                       | $\text{C}_{29}\text{H}_{24}\text{CrN}_2\text{O}_5\text{P}$ , $\text{CH}_2\text{Cl}_2$ , $\text{CF}_3\text{O}_3\text{S}$ |
| Formula weight / g/mol               | 797.47                                                                                                                  |
| $T / \text{K}$                       | 100                                                                                                                     |
| Crystal system                       | triclinic                                                                                                               |
| Space group                          | $P\bar{1}$                                                                                                              |
| $a / \text{\AA}$                     | 8.5285(6)                                                                                                               |
| $b / \text{\AA}$                     | 12.2121(9)                                                                                                              |
| $c / \text{\AA}$                     | 17.7662(12)                                                                                                             |
| $\alpha / ^{\circ}$                  | 69.997(5)                                                                                                               |
| $\beta / ^{\circ}$                   | 78.901(5)                                                                                                               |
| $\gamma / ^{\circ}$                  | 79.928(6)                                                                                                               |
| $V / \text{\AA}^3$                   | 1694.3(2)                                                                                                               |
| $Z$                                  | 2                                                                                                                       |
| $\rho_{\text{calc}} / \text{g/cm}^3$ | 1.563                                                                                                                   |
| $\mu / \text{mm}^{-1}$               | 5.868                                                                                                                   |
| $F(000)$                             | 812.0                                                                                                                   |

|                                                              |                                                                                            |
|--------------------------------------------------------------|--------------------------------------------------------------------------------------------|
| Crystal size / mm <sup>3</sup>                               | 0.2 × 0.077 × 0.01                                                                         |
| Absorption correction                                        | multi-scan                                                                                 |
| Min. and max. transmission                                   | 0.4156 and 0.9570                                                                          |
| Radiation                                                    | Cu-K $\alpha$ ( $\lambda$ = 1.54186 Å)                                                     |
| 2 $\theta$ range for data collection / °                     | 7.758 to 135.496                                                                           |
| Completeness to $\theta$                                     | 0.990                                                                                      |
| Index ranges                                                 | -10 ≤ <i>h</i> ≤ 5, -14 ≤ <i>k</i> ≤ 14, -20 ≤ <i>l</i> ≤ 21                               |
| Reflections collected                                        | 36949                                                                                      |
| Independent reflections                                      | 6088 ( <i>R</i> <sub>int</sub> = 0.0948, <i>R</i> <sub><math>\sigma</math></sub> = 0.0538) |
| Data / restraints / parameters                               | 6088 / 0 / 444                                                                             |
| Goodness-of-fit on <i>F</i> <sup>2</sup>                     | 1.032                                                                                      |
| Final <i>R</i> indexes ( <i>I</i> ≥ 2 $\sigma$ ( <i>I</i> )) | <i>R</i> <sub>1</sub> = 0.0714, $\omega R$ <sub>2</sub> = 0.1777                           |
| Final <i>R</i> indexes (all data)                            | <i>R</i> <sub>1</sub> = 0.1047, $\omega R$ <sub>2</sub> = 0.2061                           |
| Largest diff. peak and hole / e/Å <sup>3</sup>               | 0.72 and -0.62                                                                             |

**Table S27** Bond lengths for **12-Cr**.

| Atom | Atom | Length / Å | Atom | Atom | Length / Å |
|------|------|------------|------|------|------------|
| Cr   | P1   | 2.4024(15) | C8   | C9   | 1.402(7)   |
| Cr   | C25  | 1.875(6)   | C9   | C10  | 1.360(8)   |
| Cr   | C26  | 1.909(6)   | C10  | C11  | 1.381(8)   |
| Cr   | C27  | 1.915(6)   | C11  | C12  | 1.389(7)   |
| Cr   | C28  | 1.891(6)   | C13  | C14  | 1.388(7)   |
| Cr   | C29  | 1.935(6)   | C13  | C18  | 1.393(8)   |
| P1   | N1   | 1.778(4)   | C14  | C15  | 1.398(7)   |
| P1   | C1   | 1.828(5)   | C15  | C16  | 1.374(9)   |
| P1   | C6   | 1.935(5)   | C16  | C17  | 1.375(8)   |
| O1   | C25  | 1.138(7)   | C17  | C18  | 1.390(8)   |
| O2   | C26  | 1.134(7)   | C19  | C20  | 1.403(7)   |
| O3   | C27  | 1.140(7)   | C19  | C24  | 1.409(7)   |
| O4   | C28  | 1.133(7)   | C20  | C21  | 1.390(7)   |
| O5   | C29  | 1.098(7)   | C21  | C22  | 1.391(8)   |
| N1   | C2   | 1.338(7)   | C22  | C23  | 1.378(8)   |
| N1   | C3   | 1.392(6)   | C23  | C24  | 1.389(8)   |
| N2   | C2   | 1.328(7)   | Cl1  | C31  | 1.736(7)   |
| N2   | C4   | 1.375(7)   | Cl2  | C31  | 1.762(8)   |
| N2   | C5   | 1.472(7)   | S    | O6   | 1.439(4)   |
| C3   | C4   | 1.339(8)   | S    | O7   | 1.442(4)   |
| C6   | C7   | 1.551(7)   | S    | O8   | 1.430(4)   |
| C6   | C13  | 1.552(7)   | S    | C30  | 1.814(7)   |
| C6   | C19  | 1.531(7)   | F1   | C30  | 1.335(8)   |
| C7   | C8   | 1.385(8)   | F2   | C30  | 1.335(8)   |
| C7   | C12  | 1.392(7)   | F3   | C30  | 1.324(8)   |



**Table S28** Bond angles for **12-Cr**.

| Atom | Atom | Atom | Angle / °  | Atom | Atom | Atom | Angle / ° |
|------|------|------|------------|------|------|------|-----------|
| C25  | Cr   | P1   | 170.99(19) | C7   | C8   | C9   | 120.2(5)  |
| C25  | Cr   | C26  | 89.1(2)    | C10  | C9   | C8   | 121.1(5)  |
| C25  | Cr   | C27  | 85.4(2)    | C9   | C10  | C11  | 119.6(5)  |
| C25  | Cr   | C28  | 85.7(2)    | C10  | C11  | C12  | 119.8(5)  |
| C25  | Cr   | C29  | 89.3(2)    | C11  | C12  | C7   | 121.4(5)  |
| C26  | Cr   | P1   | 99.85(17)  | C14  | C13  | C6   | 117.9(4)  |
| C26  | Cr   | C27  | 90.1(2)    | C14  | C13  | C18  | 117.9(5)  |
| C26  | Cr   | C29  | 86.9(2)    | C18  | C13  | C6   | 124.0(4)  |
| C27  | Cr   | P1   | 95.43(17)  | C13  | C14  | C15  | 121.4(5)  |
| C27  | Cr   | C29  | 173.9(2)   | C16  | C15  | C14  | 119.5(5)  |
| C28  | Cr   | P1   | 85.30(17)  | C15  | C16  | C17  | 119.9(5)  |
| C28  | Cr   | C26  | 174.7(2)   | C16  | C17  | C18  | 120.7(5)  |
| C28  | Cr   | C27  | 90.8(2)    | C17  | C18  | C13  | 120.5(5)  |
| C28  | Cr   | C29  | 91.6(2)    | C20  | C19  | C6   | 121.8(4)  |
| C29  | Cr   | P1   | 90.31(17)  | C20  | C19  | C24  | 117.4(5)  |
| N1   | P1   | Cr   | 106.91(14) | C24  | C19  | C6   | 120.7(5)  |
| N1   | P1   | C1   | 98.3(2)    | C21  | C20  | C19  | 121.7(5)  |
| N1   | P1   | C6   | 99.9(2)    | C20  | C21  | C22  | 119.6(5)  |
| C1   | P1   | Cr   | 111.61(18) | C23  | C22  | C21  | 119.8(5)  |
| C1   | P1   | C6   | 103.2(2)   | C22  | C23  | C24  | 120.9(5)  |
| C6   | P1   | Cr   | 131.59(16) | C23  | C24  | C19  | 120.6(5)  |
| C2   | N1   | P1   | 126.7(4)   | O1   | C25  | Cr   | 176.4(5)  |
| C2   | N1   | C3   | 106.9(4)   | O2   | C26  | Cr   | 176.8(5)  |
| C3   | N1   | P1   | 126.1(4)   | O3   | C27  | Cr   | 175.8(5)  |
| C2   | N2   | C4   | 108.7(4)   | O4   | C28  | Cr   | 177.9(5)  |
| C2   | N2   | C5   | 124.5(5)   | O5   | C29  | Cr   | 176.9(6)  |
| C4   | N2   | C5   | 126.8(4)   | Cl1  | C31  | Cl2  | 112.1(4)  |
| N2   | C2   | N1   | 109.3(4)   | O6   | S    | O7   | 113.6(3)  |
| C4   | C3   | N1   | 108.1(5)   | O6   | S    | C30  | 103.2(3)  |
| C3   | C4   | N2   | 107.1(5)   | O7   | S    | C30  | 103.3(3)  |
| C7   | C6   | P1   | 109.0(3)   | O8   | S    | O6   | 116.0(3)  |
| C7   | C6   | C13  | 106.2(4)   | O8   | S    | O7   | 115.1(3)  |
| C13  | C6   | P1   | 108.1(3)   | O8   | S    | C30  | 103.1(3)  |
| C19  | C6   | P1   | 107.6(3)   | F1   | C30  | S    | 111.5(4)  |
| C19  | C6   | C7   | 110.9(4)   | F2   | C30  | S    | 111.6(5)  |
| C19  | C6   | C13  | 114.8(4)   | F2   | C30  | F1   | 106.3(6)  |
| C8   | C7   | C6   | 124.5(4)   | F3   | C30  | S    | 112.7(5)  |
| C8   | C7   | C12  | 117.9(5)   | F3   | C30  | F1   | 107.1(6)  |
| C12  | C7   | C6   | 117.5(5)   | F3   | C30  | F2   | 107.3(5)  |

**Table S29** Torsion angles for **12-Cr**.

| <b>A</b> | <b>B</b> | <b>C</b> | <b>D</b> | <b>Angle / °</b> | <b>A</b> | <b>B</b> | <b>C</b> | <b>D</b> | <b>Angle / °</b> |
|----------|----------|----------|----------|------------------|----------|----------|----------|----------|------------------|
| Cr       | P1       | N1       | C2       | 109.8(4)         | C8       | C9       | C10      | C11      | -0.3(8)          |
| Cr       | P1       | N1       | C3       | -62.1(4)         | C9       | C10      | C11      | C12      | -0.5(8)          |
| P1       | N1       | C2       | N2       | -172.3(3)        | C10      | C11      | C12      | C7       | 0.3(8)           |
| P1       | N1       | C3       | C4       | 172.4(4)         | C12      | C7       | C8       | C9       | -1.4(7)          |
| P1       | C6       | C7       | C8       | -9.5(6)          | C13      | C6       | C7       | C8       | -125.8(5)        |
| P1       | C6       | C7       | C12      | 169.9(4)         | C13      | C6       | C7       | C12      | 53.6(5)          |
| P1       | C6       | C13      | C14      | -57.7(5)         | C13      | C6       | C19      | C20      | 46.5(6)          |
| P1       | C6       | C13      | C18      | 128.5(4)         | C13      | C6       | C19      | C24      | -136.2(5)        |
| P1       | C6       | C19      | C20      | -73.9(5)         | C13      | C14      | C15      | C16      | 2.0(8)           |
| P1       | C6       | C19      | C24      | 103.4(5)         | C14      | C13      | C18      | C17      | 3.6(7)           |
| N1       | C3       | C4       | N2       | 0.5(6)           | C14      | C15      | C16      | C17      | 0.6(8)           |
| C1       | P1       | N1       | C2       | -5.9(5)          | C15      | C16      | C17      | C18      | -1.0(8)          |
| C1       | P1       | N1       | C3       | -177.8(4)        | C16      | C17      | C18      | C13      | -1.1(8)          |
| C2       | N1       | C3       | C4       | -0.8(6)          | C18      | C13      | C14      | C15      | -4.0(7)          |
| C2       | N2       | C4       | C3       | 0.0(6)           | C19      | C6       | C7       | C8       | 108.8(5)         |
| C3       | N1       | C2       | N2       | 0.9(6)           | C19      | C6       | C7       | C12      | -71.8(6)         |
| C4       | N2       | C2       | N1       | -0.6(6)          | C19      | C6       | C13      | C14      | -177.8(4)        |
| C5       | N2       | C2       | N1       | 178.5(5)         | C19      | C6       | C13      | C18      | 8.3(7)           |
| C5       | N2       | C4       | C3       | -179.0(5)        | C19      | C20      | C21      | C22      | 0.6(8)           |
| C6       | P1       | N1       | C2       | -111.0(4)        | C20      | C19      | C24      | C23      | -0.4(8)          |
| C6       | P1       | N1       | C3       | 77.1(4)          | C20      | C21      | C22      | C23      | -0.9(9)          |
| C6       | C7       | C8       | C9       | 178.0(4)         | C21      | C22      | C23      | C24      | 0.5(9)           |
| C6       | C7       | C12      | C11      | -178.8(5)        | C22      | C23      | C24      | C19      | 0.2(9)           |
| C6       | C13      | C14      | C15      | -178.2(4)        | C24      | C19      | C20      | C21      | 0.0(8)           |
| C6       | C13      | C18      | C17      | 177.4(5)         | O6       | S        | C30      | F1       | 179.1(5)         |
| C6       | C19      | C20      | C21      | 177.4(5)         | O6       | S        | C30      | F2       | 60.4(5)          |
| C6       | C19      | C24      | C23      | -177.8(5)        | O6       | S        | C30      | F3       | -60.4(6)         |
| C7       | C6       | C13      | C14      | 59.2(5)          | O7       | S        | C30      | F1       | -62.3(6)         |
| C7       | C6       | C13      | C18      | -114.6(5)        | O7       | S        | C30      | F2       | 179.0(4)         |
| C7       | C6       | C19      | C20      | 166.9(5)         | O7       | S        | C30      | F3       | 58.2(6)          |
| C7       | C6       | C19      | C24      | -15.8(7)         | O8       | S        | C30      | F1       | 57.9(6)          |
| C7       | C8       | C9       | C10      | 1.2(8)           | O8       | S        | C30      | F2       | -60.8(5)         |
| C8       | C7       | C12      | C11      | 0.6(7)           | O8       | S        | C30      | F3       | 178.4(5)         |

## 5 Computational Details

Quantum chemical calculations were performed with the ORCA electronic structure program package.<sup>14</sup> All geometry optimizations were run in redundant internal coordinates with tight convergence criteria, using Grimme's fast PBEh-3c composite functional<sup>15</sup> which makes use of the atom-pairwise dispersion correction with the Becke-Johnson damping scheme (D3BJ)<sup>16,17</sup> and geometrical counterpoise gCP correction.<sup>18</sup> For W atoms the ecp-46 effective core potential (ECP) was used<sup>19,20</sup> to take into account scalar relativistic effects in the DFT calculations. Harmonic frequency calculations verified the nature of the computed species as minima structures, featuring nonnegative eigenvalues. From these geometries, all reported electronic data were obtained using the double-hybrid-meta-GGA functional PWPB95<sup>21,22</sup> with Grimme's D3 correction (PWPB95-D3) and the def2-QZVPP<sup>23</sup> basis set. Solvent effects (toluene) were included using the Conductor-like Polarizable Continuum Model (CPCM).<sup>24,25</sup> Data of the Laplacian of the electron density along the P-ligand bond path were obtained using Multiwfn.<sup>26</sup>

## 6 Calculated structures

Cartesian coordinates (in Å) and energies (in hartrees) for all computed species. Geometries, zero-point energy correction (ZPE) and Gibbs energy correction ( $G_{\text{corr}}$ ) at the optimization level (*vide supra*), whereas electronic energies are computed at the CPCM(toluene)/PWPB95-D3/def2-QZVPP(ecp) level. When explicitly stated, geometries and energy calculations were obtained in the gas phase, including the thermal vibrational correction (TVC) to energy and the total entropy term  $T \cdot S$ , at 298K.

**1'**

$E = -1398.38964048$  au  
ZPE = 0.27476237 au  
 $G_{\text{corr}} = 0.22262073$  au

|   |           |           |          |   |           |           |           |
|---|-----------|-----------|----------|---|-----------|-----------|-----------|
| P | -0.604425 | 0.578718  | 0.388630 | C | -5.226412 | 2.966323  | -0.136008 |
| C | -0.242225 | 0.427138  | 2.235749 | H | -5.346940 | 3.653022  | -0.970192 |
| C | 0.508387  | -0.903929 | 2.347287 | H | -5.765434 | 3.345953  | 0.728313  |
| H | 0.772611  | -1.096422 | 3.390251 | H | -5.636546 | 1.999672  | -0.412053 |
| H | -0.099614 | -1.739687 | 1.997300 | H | -3.511405 | 0.727429  | -0.173935 |
| H | 1.437534  | -0.906497 | 1.776275 | H | -3.308526 | 4.833495  | 0.715138  |
| C | 0.607855  | 1.540728  | 2.835522 | H | -0.827649 | 3.707162  | 1.047611  |
| H | 0.116555  | 2.513158  | 2.778010 | W | 1.294886  | 1.543566  | -1.113949 |
| H | 0.799686  | 1.343434  | 3.894746 | C | 2.618676  | 2.175811  | -2.477573 |
| H | 1.572424  | 1.623028  | 2.336133 | O | 3.368051  | 2.545517  | -3.268252 |
| C | -1.556701 | 0.309742  | 3.008355 | C | 1.628036  | 3.232822  | -0.013062 |
| H | -1.355186 | 0.041813  | 4.049368 | O | 1.845657  | 4.189050  | 0.581067  |
| H | -2.113176 | 1.248676  | 3.024110 | C | 2.817518  | 0.625763  | -0.084871 |
| H | -2.204380 | -0.461436 | 2.587158 | O | 3.695058  | 0.139391  | 0.464369  |
| N | -1.863785 | 1.919548  | 0.455733 | C | 0.998965  | -0.181410 | -2.206817 |
| C | -3.120334 | 1.688165  | 0.116333 | O | 0.843779  | -1.134725 | -2.814799 |
| N | -3.821058 | 2.815287  | 0.183065 | C | -0.222589 | 2.480797  | -2.123081 |
| C | -2.976872 | 3.817447  | 0.587914 | O | -1.082069 | 3.004651  | -2.668490 |
| C | -1.755645 | 3.254433  | 0.752580 |   |           |           |           |

**1'** (gas phase)

$E = -1398.37555568$  au  
ZPE = 0.27562876 au  
TVC = 0.02296481 au  
 $T \cdot S = 49.89$  kcal/mol  
 $G_{\text{corr}} = 0.22286675$  au

|   |           |           |          |   |           |           |          |
|---|-----------|-----------|----------|---|-----------|-----------|----------|
| P | -0.612736 | 0.551615  | 0.443918 | H | 1.587883  | 1.623510  | 2.341356 |
| C | -0.211577 | 0.401561  | 2.282109 | C | -1.508287 | 0.264851  | 3.080686 |
| C | 0.553954  | -0.923513 | 2.365545 | H | -1.285982 | -0.000143 | 4.118199 |
| H | 0.828844  | -1.130741 | 3.402859 | H | -2.078702 | 1.195394  | 3.107185 |
| H | -0.047623 | -1.759825 | 2.006313 | H | -2.151435 | -0.515221 | 2.669742 |
| H | 1.478485  | -0.905579 | 1.787840 | N | -1.867929 | 1.915710  | 0.537166 |
| C | 0.644044  | 1.515389  | 2.873415 | C | -3.093630 | 1.711529  | 0.097714 |
| H | 0.138354  | 2.481936  | 2.856070 | N | -3.783961 | 2.850564  | 0.124140 |
| H | 0.877397  | 1.301531  | 3.920952 | C | -2.956258 | 3.831171  | 0.609122 |

|   |           |          |           |   |           |           |           |
|---|-----------|----------|-----------|---|-----------|-----------|-----------|
| C | -1.761628 | 3.243220 | 0.860121  | O | 3.206450  | 2.595997  | -3.326068 |
| C | -5.147265 | 3.032805 | -0.322569 | C | 1.534770  | 3.243323  | -0.021755 |
| H | -5.178302 | 3.715431 | -1.169018 | O | 1.728708  | 4.205324  | 0.571787  |
| H | -5.759976 | 3.427766 | 0.484739  | C | 2.791672  | 0.662371  | -0.116345 |
| H | -5.555700 | 2.075337 | -0.633121 | O | 3.687454  | 0.193445  | 0.415590  |
| H | -3.467193 | 0.759200 | -0.239589 | C | 0.935932  | -0.190924 | -2.195513 |
| H | -3.276617 | 4.852461 | 0.721670  | O | 0.787029  | -1.145500 | -2.800894 |
| H | -0.848516 | 3.675028 | 1.225046  | C | -0.353077 | 2.434025  | -2.067355 |
| W | 1.218283  | 1.544617 | -1.108776 | O | -1.260083 | 2.924782  | -2.567991 |
| C | 2.491922  | 2.209190 | -2.516354 |   |           |           |           |

MeOH

$E = -115.70940250$  au

ZPE = 0.05271417 au

$G_{\text{corr}} = 0.02999481$  au

|   |           |           |           |   |           |           |           |
|---|-----------|-----------|-----------|---|-----------|-----------|-----------|
| C | -0.033383 | -0.013677 | -0.007631 | H | -0.481903 | 0.923631  | -0.356361 |
| H | -0.008240 | 0.015405  | 1.087744  | O | -0.679583 | -1.155325 | -0.513626 |
| H | 0.998017  | -0.033417 | -0.358318 | H | -1.589299 | -1.145119 | -0.209132 |

$1'$ -MeOH

$E = -1514.11134701$  au

ZPE = 0.32959465 au

$G_{\text{corr}} = 0.27100276$  au

|   |           |           |           |   |           |           |           |
|---|-----------|-----------|-----------|---|-----------|-----------|-----------|
| P | -0.084759 | -0.044580 | -0.011318 | H | -3.725434 | -3.483871 | -1.735174 |
| C | -0.065662 | -0.079022 | 1.872512  | H | -1.597600 | -2.390276 | -1.062050 |
| C | 1.424179  | -0.154177 | 2.221026  | H | -5.100158 | -0.111394 | -0.525397 |
| H | 1.550583  | -0.176776 | 3.306233  | H | -2.930119 | 1.355498  | 0.291685  |
| H | 1.888475  | -1.053549 | 1.813034  | W | 0.351757  | 2.223096  | -1.197799 |
| H | 1.982701  | 0.706585  | 1.851754  | C | 0.734800  | 3.828049  | -2.335585 |
| C | -0.688194 | 1.140201  | 2.542486  | O | 0.943853  | 4.743294  | -2.999054 |
| H | -1.752630 | 1.234030  | 2.321654  | C | -1.110425 | 3.273711  | -0.228184 |
| H | -0.593683 | 1.064338  | 3.629832  | O | -1.911325 | 3.898409  | 0.302526  |
| H | -0.199439 | 2.063359  | 2.232888  | C | 1.693059  | 2.914343  | 0.196681  |
| C | -0.749148 | -1.351509 | 2.373431  | O | 2.439303  | 3.338865  | 0.951773  |
| H | -0.591660 | -1.458304 | 3.450204  | C | 1.877790  | 1.205001  | -2.140212 |
| H | -1.828128 | -1.333968 | 2.210378  | O | 2.731893  | 0.655980  | -2.661626 |
| H | -0.347267 | -2.244279 | 1.890538  | C | -1.003603 | 1.543719  | -2.578985 |
| N | -1.860594 | -0.416273 | -0.293427 | O | -1.765504 | 1.149545  | -3.336181 |
| C | -2.256796 | -1.573721 | -0.802094 | O | 0.551570  | -2.952900 | -1.446179 |
| N | -3.576789 | -1.568989 | -0.945137 | H | 0.622033  | -2.161360 | -0.878526 |
| C | -4.052963 | -0.359232 | -0.507635 | C | 0.821751  | -2.537642 | -2.763190 |
| C | -2.977595 | 0.358743  | -0.104828 | H | 1.865111  | -2.237599 | -2.906153 |
| C | -4.375072 | -2.649710 | -1.488473 | H | 0.622347  | -3.373307 | -3.434249 |
| H | -4.885174 | -2.318699 | -2.389633 | H | 0.192031  | -1.697160 | -3.082010 |
| H | -5.107692 | -2.975799 | -0.754569 |   |           |           |           |

$(1'$ -MeOH $\rightarrow 4'$ -MeOH) $^\ddagger$

$E = -1514.07134412$  au

ZPE = 0.32134012 au

$G_{\text{corr}} = 0.26472170$  au  
 $\nu = -1067.67$  cm<sup>-1</sup>

|   |           |           |           |   |           |           |           |
|---|-----------|-----------|-----------|---|-----------|-----------|-----------|
| P | -0.176047 | 0.100759  | -0.028816 | H | -3.472038 | -3.604804 | -1.700685 |
| C | -0.034746 | -0.103109 | 1.820302  | H | -1.167275 | -2.346061 | -1.008905 |
| C | 1.471388  | -0.185599 | 2.085826  | H | -5.105326 | -0.307136 | -0.630087 |
| H | 1.645565  | -0.294510 | 3.158414  | H | -3.071729 | 1.343415  | 0.175412  |
| H | 1.922301  | -1.046118 | 1.588701  | W | 0.362545  | 2.275867  | -1.221904 |
| H | 2.005648  | 0.708254  | 1.763371  | C | 0.768160  | 3.902465  | -2.338518 |
| C | -0.645029 | 1.080281  | 2.562810  | O | 0.989746  | 4.822662  | -2.984280 |
| H | -1.718182 | 1.167529  | 2.382888  | C | -1.133219 | 3.307008  | -0.275005 |
| H | -0.507975 | 0.953917  | 3.639460  | O | -1.951955 | 3.908280  | 0.250896  |
| H | -0.178557 | 2.024328  | 2.280261  | C | 1.670395  | 2.974193  | 0.202093  |
| C | -0.695455 | -1.408581 | 2.260278  | O | 2.397456  | 3.405442  | 0.969857  |
| H | -0.486293 | -1.579608 | 3.318932  | C | 1.916596  | 1.274262  | -2.141702 |
| H | -1.779786 | -1.381540 | 2.147248  | O | 2.785045  | 0.739472  | -2.650054 |
| H | -0.315040 | -2.267177 | 1.705058  | C | -0.951213 | 1.627396  | -2.669190 |
| N | -1.870651 | -0.380446 | -0.340644 | O | -1.683724 | 1.271085  | -3.467952 |
| C | -2.146165 | -1.602511 | -0.822674 | O | 0.151859  | -2.638983 | -1.116734 |
| N | -3.465153 | -1.665695 | -0.974576 | H | 0.306211  | -1.250970 | -0.539971 |
| C | -4.043210 | -0.477236 | -0.587735 | C | 0.474056  | -2.559727 | -2.465661 |
| C | -3.037765 | 0.333428  | -0.191505 | H | 0.772152  | -3.531819 | -2.882545 |
| C | -4.183131 | -2.811647 | -1.492327 | H | -0.365616 | -2.201166 | -3.091677 |
| H | -4.701027 | -2.547452 | -2.411613 | H | 1.308905  | -1.870655 | -2.665781 |
| H | -4.905899 | -3.164821 | -0.760297 |   |           |           |           |

#### 4'-MeOH

$E = -1514.09455275$  au  
 $ZPE = 0.32712476$  au  
 $G_{\text{corr}} = 0.27036209$  au

|   |           |           |           |   |           |           |           |
|---|-----------|-----------|-----------|---|-----------|-----------|-----------|
| P | -0.242603 | 0.190004  | 0.056139  | H | -4.869951 | -3.152381 | -0.715975 |
| C | -0.064348 | -0.041468 | 1.893500  | H | -3.428369 | -3.594607 | -1.643957 |
| C | 1.441795  | -0.072662 | 2.164463  | H | -0.664206 | -2.802643 | -1.216293 |
| H | 1.611717  | -0.186621 | 3.236832  | H | -5.078331 | -0.300782 | -0.623836 |
| H | 1.927351  | -0.912581 | 1.664689  | H | -3.067633 | 1.365287  | 0.183047  |
| H | 1.946557  | 0.842186  | 1.855426  | W | 0.337814  | 2.312943  | -1.170134 |
| C | -0.718494 | 1.124651  | 2.628561  | C | 0.775018  | 3.911361  | -2.325479 |
| H | -1.793643 | 1.173774  | 2.446519  | O | 1.018359  | 4.807778  | -2.993238 |
| H | -0.579340 | 1.003720  | 3.704785  | C | -1.168398 | 3.377021  | -0.271326 |
| H | -0.282513 | 2.083852  | 2.346765  | O | -1.991707 | 3.992028  | 0.228311  |
| C | -0.689368 | -1.367394 | 2.321948  | C | 1.627489  | 3.046052  | 0.252770  |
| H | -0.478383 | -1.536226 | 3.380291  | O | 2.344519  | 3.499080  | 1.016842  |
| H | -1.772186 | -1.372060 | 2.199757  | C | 1.893610  | 1.271195  | -2.039783 |
| H | -0.283300 | -2.211930 | 1.763326  | O | 2.757734  | 0.701137  | -2.515144 |
| N | -1.853141 | -0.377419 | -0.302364 | C | -0.959663 | 1.651143  | -2.631729 |
| C | -2.087390 | -1.631396 | -0.779243 | O | -1.677170 | 1.297304  | -3.442951 |
| N | -3.419166 | -1.657550 | -0.933006 | O | 0.172790  | -3.229944 | -1.517131 |
| C | -4.015952 | -0.468300 | -0.568532 | H | 0.421023  | -0.965932 | -0.387846 |
| C | -3.024598 | 0.350449  | -0.171329 | C | 0.408860  | -2.786746 | -2.823070 |
| C | -4.141112 | -2.800656 | -1.444373 | H | -0.332166 | -3.152016 | -3.546474 |
| H | -4.658437 | -2.547008 | -2.368236 | H | 0.427270  | -1.690806 | -2.912982 |

H 1.385482 -3.149167 -3.148573

(4'·MeOH→5')<sup>‡</sup>

$E = -1514.05891731$  au

ZPE = 0.32325338 au

$G_{\text{corr}} = 0.26768839$  au

$\nu = -983.86$  cm<sup>-1</sup>

|   |           |           |           |   |           |           |           |
|---|-----------|-----------|-----------|---|-----------|-----------|-----------|
| P | -0.221182 | -0.035599 | 0.536159  | H | -3.097436 | -2.026645 | -3.326323 |
| C | -0.369754 | 0.355075  | 2.356689  | H | -1.072962 | -1.019169 | -2.212056 |
| C | 0.977599  | 1.000846  | 2.709115  | H | -4.745382 | -2.116814 | 0.125816  |
| H | 1.007232  | 1.178143  | 3.786117  | H | -2.993881 | -0.979432 | 1.865376  |
| H | 1.825703  | 0.357902  | 2.464691  | W | 0.580511  | 1.610661  | -1.165262 |
| H | 1.120501  | 1.959152  | 2.213408  | C | 1.297119  | 2.802945  | -2.621209 |
| C | -1.487490 | 1.360737  | 2.627230  | O | 1.706882  | 3.478754  | -3.451447 |
| H | -2.485148 | 0.957620  | 2.461277  | C | 0.141580  | 3.245420  | -0.085279 |
| H | -1.438341 | 1.676847  | 3.671147  | O | -0.073601 | 4.207881  | 0.511440  |
| H | -1.388253 | 2.253618  | 2.011817  | C | 2.447301  | 1.586539  | -0.326086 |
| C | -0.514812 | -0.909684 | 3.206669  | O | 3.495044  | 1.614789  | 0.133952  |
| H | -0.528219 | -0.630816 | 4.262490  | C | 1.245775  | -0.116067 | -2.352461 |
| H | -1.423217 | -1.476539 | 3.015689  | O | 2.162355  | -0.734089 | -2.695352 |
| H | 0.328582  | -1.584992 | 3.057887  | C | -1.276463 | 1.736192  | -2.039061 |
| N | -1.753546 | -0.841614 | 0.083157  | O | -2.312170 | 1.865007  | -2.506691 |
| C | -1.930910 | -1.199791 | -1.203211 | O | -0.274579 | -0.879421 | -3.138607 |
| N | -3.144151 | -1.743200 | -1.272579 | H | 0.560285  | -1.203902 | 0.659980  |
| C | -3.751952 | -1.736664 | -0.040149 | C | -0.101395 | -2.101317 | -3.793308 |
| C | -2.877269 | -1.173192 | 0.816827  | H | 0.958261  | -2.368877 | -3.876365 |
| C | -3.745184 | -2.256537 | -2.486438 | H | -0.593871 | -2.925437 | -3.254925 |
| H | -4.711754 | -1.785921 | -2.650638 | H | -0.510191 | -2.075243 | -4.808878 |
| H | -3.875795 | -3.334500 | -2.419640 |   |           |           |           |

5'

$E = -1514.08433379$  au

ZPE = 0.32973716 au

$G_{\text{corr}} = 0.27484782$  au

|   |           |           |          |   |           |           |           |
|---|-----------|-----------|----------|---|-----------|-----------|-----------|
| P | -0.242624 | -0.020335 | 0.560483 | C | -2.100622 | -1.174632 | -1.111379 |
| C | -0.381942 | 0.369678  | 2.381001 | N | -3.300928 | -1.724963 | -1.177844 |
| C | 0.974051  | 1.021885  | 2.694217 | C | -3.838605 | -1.755384 | 0.082263  |
| H | 1.021990  | 1.225306  | 3.766008 | C | -2.917777 | -1.213357 | 0.911327  |
| H | 1.816304  | 0.370703  | 2.450448 | C | -3.946526 | -2.187006 | -2.392860 |
| H | 1.110436  | 1.965513  | 2.169341 | H | -4.850303 | -1.610392 | -2.571122 |
| C | -1.493513 | 1.381637  | 2.649482 | H | -4.194265 | -3.240984 | -2.300987 |
| H | -2.494292 | 0.976964  | 2.501302 | H | -3.268609 | -2.051061 | -3.229873 |
| H | -1.433119 | 1.716796  | 3.686810 | H | -1.449634 | -1.014858 | -1.959753 |
| H | -1.396796 | 2.261590  | 2.013999 | H | -4.820807 | -2.145780 | 0.284580  |
| C | -0.505048 | -0.880687 | 3.253913 | H | -2.980016 | -1.055668 | 1.970145  |
| H | -0.474711 | -0.587401 | 4.305421 | W | 0.477793  | 1.531154  | -1.183587 |
| H | -1.425317 | -1.442706 | 3.110585 | C | 1.173679  | 2.514434  | -2.800813 |
| H | 0.325471  | -1.566309 | 3.081922 | O | 1.568799  | 3.045549  | -3.737839 |
| N | -1.829458 | -0.850907 | 0.150035 | C | 0.205405  | 3.233807  | -0.157585 |

O 0.065240 4.220303 0.429767  
 C 2.406756 1.424344 -0.470116  
 O 3.478902 1.402497 -0.073467  
 C 0.959355 -0.402354 -2.259343  
 O 1.823143 -1.208382 -1.979937  
 C -1.406003 1.742005 -1.922155  
 O -2.474279 1.891275 -2.322883

O 0.171346 -0.683903 -3.365672  
 H 0.500383 -1.215340 0.667430  
 C 0.489800 -1.850218 -4.115335  
 H 1.504542 -1.817846 -4.514971  
 H 0.385274 -2.767148 -3.530205  
 H -0.211639 -1.880320 -4.947302

5<sup>conf-eq</sup>

$E = -1514.09195872$  au

ZPE = 0.32986161 au

$G_{\text{corr}} = 0.27608133$  au

P 0.061153 0.155070 0.045103  
 C 1.896746 -0.157408 -0.009327  
 C 2.505932 1.227066 -0.257415  
 H 3.590778 1.132564 -0.338594  
 H 2.147700 1.675985 -1.186539  
 H 2.293372 1.919774 0.556594  
 C 2.395108 -0.715206 1.321379  
 H 2.051563 -1.736284 1.494315  
 H 3.486729 -0.745258 1.316116  
 H 2.086574 -0.101180 2.166780  
 C 2.263703 -1.098562 -1.153879  
 H 3.350085 -1.194914 -1.213477  
 H 1.860338 -2.102096 -1.011570  
 H 1.916470 -0.723871 -2.118491  
 N -0.578539 -1.534010 0.003173  
 C -1.262180 -2.061362 -1.001362  
 N -1.758399 -3.229237 -0.625695  
 C -1.392740 -3.459185 0.678961  
 C -0.661735 -2.392870 1.073554  
 C -2.583026 -4.102352 -1.438959  
 H -3.558296 -4.223820 -0.974904  
 H -2.104198 -5.072335 -1.544302

H -2.712002 -3.659337 -2.421491  
 H -1.406642 -1.609714 -1.966832  
 H -1.685418 -4.346653 1.212158  
 H -0.208807 -2.179908 2.025365  
 W -1.136902 1.662559 1.548656  
 C -2.331207 2.951012 2.539724  
 O -3.011283 3.688694 3.095810  
 C 0.404097 2.075894 2.761215  
 O 1.291656 2.317229 3.464520  
 C -0.617204 3.198447 0.298125  
 O -0.332820 4.067543 -0.393729  
 C -2.827905 1.117215 0.132388  
 O -2.809423 0.317152 -0.795422  
 C -1.777496 0.188873 2.809444  
 O -2.154524 -0.621725 3.530543  
 O -3.997344 1.773652 0.363517  
 H -0.140716 0.362372 -1.333620  
 C -5.100443 1.488835 -0.484968  
 H -4.895294 1.730629 -1.529857  
 H -5.409587 0.442791 -0.429539  
 H -5.920331 2.113429 -0.136519

5<sup>conf-ax</sup>

$E = -1514.08701026$  au

ZPE = 0.32942042 au

$G_{\text{corr}} = 0.27355776$  au

P -0.189557 0.107669 0.214513  
 C -0.444822 -0.151939 2.044337  
 C 0.244531 -1.418667 2.543568  
 H 0.171107 -1.463817 3.632337  
 H -0.217197 -2.327511 2.155964  
 H 1.307076 -1.434842 2.291627  
 C 0.192817 1.071444 2.711903  
 H -0.253212 2.008442 2.384348  
 H 0.050339 0.998888 3.792072  
 H 1.265246 1.129125 2.521016

C -1.940845 -0.199425 2.342864  
 H -2.097098 -0.257941 3.422076  
 H -2.456502 0.688562 1.977425  
 H -2.422890 -1.072535 1.898951  
 N -0.400955 -1.598310 -0.395332  
 C 0.574192 -2.442084 -0.702013  
 N 0.053018 -3.543751 -1.221795  
 C -1.311473 -3.404550 -1.251036  
 C -1.593745 -2.183252 -0.740252  
 C 0.797207 -4.689819 -1.710797



|   |           |           |           |   |           |           |           |
|---|-----------|-----------|-----------|---|-----------|-----------|-----------|
| H | 0.620567  | -4.815438 | -2.775787 | O | -1.997709 | 3.807006  | 1.096319  |
| H | 0.485327  | -5.584934 | -1.179420 | C | 0.782608  | 2.634034  | -1.333730 |
| H | 1.857237  | -4.527015 | -1.543092 | O | 1.417021  | 2.982518  | -2.306228 |
| H | 1.627039  | -2.260023 | -0.565396 | C | -0.819378 | 0.485567  | -2.774548 |
| H | -1.960758 | -4.170365 | -1.638167 | O | -0.561081 | -0.234455 | -3.631396 |
| H | -2.539643 | -1.685562 | -0.620433 | O | 1.381042  | 2.785360  | -0.097056 |
| W | -1.287249 | 1.725196  | -1.224355 | H | 1.217477  | -0.001405 | 0.184878  |
| C | -1.892276 | 3.118375  | -2.560263 | C | 2.685478  | 3.344456  | -0.064290 |
| O | -2.209795 | 3.903738  | -3.331770 | H | 3.414167  | 2.739739  | -0.609186 |
| C | -3.120683 | 0.935890  | -1.065272 | H | 2.715008  | 4.356911  | -0.471521 |
| O | -4.179239 | 0.474990  | -0.952857 | H | 2.976124  | 3.382343  | 0.984435  |
| C | -1.728034 | 3.049153  | 0.280427  |   |           |           |           |

(5' → 3a'+NMelm)<sup>‡ax</sup>

$E = -1514.07684953$  au

ZPE = 0.32893493 au

$G_{\text{corr}} = 0.27425757$  au

$\nu = -174.25$  cm<sup>-1</sup>

|   |           |           |           |   |           |           |           |
|---|-----------|-----------|-----------|---|-----------|-----------|-----------|
| P | -0.108038 | -0.058232 | -0.112891 | H | -3.636718 | -3.892938 | -1.365346 |
| C | -0.251659 | -0.093310 | 1.789057  | H | -1.541849 | -2.715575 | -0.782886 |
| C | 1.121262  | 0.364619  | 2.285173  | H | -5.018218 | -0.353426 | -0.831396 |
| H | 1.193781  | 0.217724  | 3.365540  | H | -2.862593 | 1.228268  | -0.183810 |
| H | 1.941193  | -0.197708 | 1.829714  | W | 0.595789  | 2.141871  | -1.210832 |
| H | 1.287723  | 1.423004  | 2.087897  | C | 1.236503  | 3.710492  | -2.267102 |
| C | -1.326328 | 0.828324  | 2.355652  | O | 1.608226  | 4.610337  | -2.879057 |
| H | -2.334596 | 0.461086  | 2.159026  | C | -0.090359 | 3.430293  | 0.176875  |
| H | -1.222673 | 0.892537  | 3.441832  | O | -0.455478 | 4.216185  | 0.936777  |
| H | -1.252715 | 1.843070  | 1.967283  | C | 2.430936  | 2.109238  | -0.296513 |
| C | -0.500294 | -1.520795 | 2.277836  | O | 3.472675  | 2.131427  | 0.176526  |
| H | -0.468635 | -1.553852 | 3.369875  | C | 1.353782  | 0.794878  | -2.708024 |
| H | -1.479756 | -1.901795 | 1.981808  | O | 2.006405  | 0.384387  | -3.556871 |
| H | 0.258359  | -2.217882 | 1.914049  | C | -1.167946 | 2.232324  | -2.255070 |
| N | -1.805643 | -0.630728 | -0.388020 | O | -2.131919 | 2.308828  | -2.866892 |
| C | -2.186742 | -1.858030 | -0.696770 | O | -0.001860 | -0.693597 | -2.237343 |
| N | -3.497596 | -1.872157 | -0.897776 | H | 0.644975  | -1.251762 | -0.096174 |
| C | -3.977608 | -0.600342 | -0.714786 | C | 0.442495  | -1.958103 | -2.535085 |
| C | -2.914031 | 0.174908  | -0.395973 | H | -0.351275 | -2.621839 | -2.922555 |
| C | -4.289324 | -3.031768 | -1.260256 | H | 1.233523  | -1.960428 | -3.302088 |
| H | -4.792738 | -2.851943 | -2.206521 | H | 0.886950  | -2.484938 | -1.661967 |
| H | -5.026147 | -3.235149 | -0.487466 |   |           |           |           |

(5' → 3a'+NMelm)<sup>‡eq</sup>

$E = -1514.06552477$  au

ZPE = 0.32733680 au

$G_{\text{corr}} = 0.27303963$  au

$\nu = -234.64$  cm<sup>-1</sup>

|   |           |          |           |   |          |          |           |
|---|-----------|----------|-----------|---|----------|----------|-----------|
| P | -0.562359 | 0.366893 | 0.049338  | H | 2.898484 | 1.444278 | -0.805680 |
| C | 1.285288  | 0.085675 | -0.333455 | H | 1.312668 | 2.143595 | -1.099264 |
| C | 1.876011  | 1.494122 | -0.423443 | H | 1.915740 | 1.976266 | 0.552634  |

|   |           |           |           |   |           |           |           |
|---|-----------|-----------|-----------|---|-----------|-----------|-----------|
| C | 2.035141  | -0.708097 | 0.730892  | H | -0.364736 | -1.876105 | 2.091490  |
| H | 1.755709  | -1.762626 | 0.737271  | W | -1.153669 | 1.756741  | 2.112742  |
| H | 3.109117  | -0.669968 | 0.531371  | C | -1.842990 | 2.897784  | 3.599316  |
| H | 1.882404  | -0.309882 | 1.732902  | O | -2.244508 | 3.556580  | 4.452057  |
| C | 1.448917  | -0.604183 | -1.688261 | C | 0.468168  | 1.366137  | 3.241390  |
| H | 2.507413  | -0.659596 | -1.955034 | O | 1.373741  | 1.184544  | 3.930841  |
| H | 1.073025  | -1.629286 | -1.686141 | C | -0.245062 | 3.431951  | 1.356412  |
| H | 0.944436  | -0.060002 | -2.490234 | O | 0.234053  | 4.398543  | 0.974677  |
| N | -0.965444 | -1.399598 | 0.084887  | C | -2.893283 | 2.204690  | 0.928543  |
| C | -1.537133 | -2.101119 | -0.878387 | O | -3.799994 | 2.772716  | 0.516200  |
| N | -1.742220 | -3.340985 | -0.454618 | C | -2.177797 | 0.176211  | 2.927567  |
| C | -1.287444 | -3.438623 | 0.835766  | O | -2.771482 | -0.676793 | 3.406261  |
| C | -0.801963 | -2.219588 | 1.170547  | O | -2.775471 | 0.433973  | -0.135972 |
| C | -2.351418 | -4.410906 | -1.220798 | H | -0.803178 | 0.734246  | -1.291909 |
| H | -3.231855 | -4.779743 | -0.701220 | C | -3.340111 | 0.502698  | -1.385442 |
| H | -1.641045 | -5.222335 | -1.356693 | H | -3.872324 | -0.420459 | -1.677505 |
| H | -2.648595 | -4.031172 | -2.193446 | H | -4.080667 | 1.313913  | -1.472952 |
| H | -1.806114 | -1.731633 | -1.852993 | H | -2.600105 | 0.700913  | -2.192129 |
| H | -1.351803 | -4.350272 | 1.403415  |   |           |           |           |

**3a'**

$E = -1248.65846312$  au

ZPE = 0.22416631 au

$G_{\text{corr}} = 0.17459735$  au

|   |           |           |           |   |           |           |           |
|---|-----------|-----------|-----------|---|-----------|-----------|-----------|
| P | 0.866477  | -0.222563 | 0.042102  | O | 0.823547  | 4.358932  | -3.313523 |
| C | 0.321953  | -0.264392 | 1.811211  | C | -0.371969 | 2.953166  | -0.084934 |
| C | 1.087087  | 0.841750  | 2.538727  | O | -1.000776 | 3.620498  | 0.595292  |
| H | 0.825375  | 0.825561  | 3.598534  | C | 2.470801  | 2.503615  | -0.427150 |
| H | 2.168794  | 0.707124  | 2.469743  | O | 3.407574  | 2.866241  | 0.114325  |
| H | 0.846714  | 1.835029  | 2.160298  | C | 1.940718  | 0.868357  | -2.768718 |
| C | -1.184512 | -0.023619 | 1.889390  | O | 2.597083  | 0.360472  | -3.552541 |
| H | -1.747930 | -0.818075 | 1.400260  | C | -0.957516 | 1.162985  | -2.269052 |
| H | -1.494528 | 0.005560  | 2.936055  | O | -1.924202 | 0.792958  | -2.747708 |
| H | -1.478067 | 0.923363  | 1.437050  | O | 0.086194  | -1.550947 | -0.525054 |
| C | 0.670577  | -1.621152 | 2.425572  | H | 2.192308  | -0.702404 | 0.204975  |
| H | 0.376348  | -1.628153 | 3.477518  | C | 0.458189  | -2.097134 | -1.776502 |
| H | 0.151190  | -2.441362 | 1.932463  | H | 1.520055  | -2.359424 | -1.805633 |
| H | 1.742464  | -1.821551 | 2.383624  | H | -0.125115 | -3.004266 | -1.920493 |
| W | 0.774698  | 1.845488  | -1.385568 | H | 0.243603  | -1.416629 | -2.603433 |
| C | 0.799824  | 3.455360  | -2.612093 |   |           |           |           |

**6'**

$E = -1132.85770290$  au

ZPE = 0.16863624 au

$G_{\text{corr}} = 0.12191948$  au

|   |           |           |          |   |           |           |          |
|---|-----------|-----------|----------|---|-----------|-----------|----------|
| P | -0.429242 | 0.458832  | 0.368451 | H | -0.082877 | -1.835058 | 1.938266 |
| C | -0.126783 | 0.347998  | 2.210441 | H | 1.517723  | -1.085103 | 1.934891 |
| C | 0.521462  | -1.037235 | 2.375627 | C | 0.755456  | 1.424022  | 2.826241 |
| H | 0.622840  | -1.256176 | 3.442265 | H | 0.313869  | 2.414933  | 2.716202 |

|   |           |           |           |   |           |           |           |
|---|-----------|-----------|-----------|---|-----------|-----------|-----------|
| H | 0.874079  | 1.240404  | 3.897720  | C | 1.352063  | 3.229457  | 0.085633  |
| H | 1.752482  | 1.446677  | 2.389918  | O | 1.444188  | 4.196382  | 0.677767  |
| C | -1.494417 | 0.347846  | 2.901790  | C | 2.833272  | 0.755361  | 0.022608  |
| H | -1.371532 | 0.184059  | 3.975953  | O | 3.739862  | 0.358185  | 0.586182  |
| H | -2.010745 | 1.300772  | 2.772916  | C | 1.134810  | -0.226534 | -2.189376 |
| H | -2.143284 | -0.437336 | 2.512788  | O | 1.089641  | -1.162267 | -2.833935 |
| W | 1.216096  | 1.489499  | -1.030650 | C | -0.384518 | 2.231723  | -2.114606 |
| C | 2.500379  | 2.321350  | -2.445922 | O | -1.259348 | 2.632841  | -2.720762 |
| O | 3.204803  | 2.774789  | -3.215728 |   |           |           |           |

N-Melm

$E = -265.47223160$  au

ZPE = 0.10229563 au

$G_{\text{corr}} = 0.07362241$  au

|   |           |           |           |   |           |           |           |
|---|-----------|-----------|-----------|---|-----------|-----------|-----------|
| N | -0.595149 | -1.164843 | -0.637517 | H | -3.645717 | -0.974895 | -3.513057 |
| C | -1.065054 | -0.515103 | -1.668488 | H | -2.247992 | -1.483945 | -4.475915 |
| N | -1.884150 | -1.279441 | -2.423737 | H | -2.335778 | 0.161604  | -3.842262 |
| C | -1.937513 | -2.507300 | -1.826656 | H | -0.848768 | 0.512307  | -1.921830 |
| C | -1.134438 | -2.413767 | -0.725808 | H | -2.525342 | -3.316786 | -2.226023 |
| C | -2.567497 | -0.878841 | -3.629057 | H | -0.919825 | -3.179914 | 0.002783  |

7'

$E = -1248.59012068$  au

ZPE = 0.22531538 au

$G_{\text{corr}} = 0.17516343$  au

|   |           |           |           |   |           |           |           |
|---|-----------|-----------|-----------|---|-----------|-----------|-----------|
| P | 0.069764  | 0.029225  | 0.200825  | O | 3.748858  | 3.099406  | -2.922722 |
| C | 0.178448  | 0.054084  | 2.073031  | C | 2.064725  | 2.858689  | 0.388417  |
| C | 1.588489  | 0.029889  | 2.648575  | O | 2.242713  | 3.686782  | 1.154035  |
| H | 1.551416  | 0.064467  | 3.741218  | C | 3.425528  | 0.419536  | -0.281514 |
| H | 2.124709  | -0.879955 | 2.374071  | O | 4.338400  | -0.117315 | 0.152831  |
| H | 2.179594  | 0.880957  | 2.313882  | C | 1.634628  | 0.075441  | -2.600886 |
| C | -0.527460 | 1.363500  | 2.445623  | O | 1.549026  | -0.656777 | -3.476553 |
| H | -1.553069 | 1.394919  | 2.071886  | C | 0.190032  | 2.465332  | -1.785746 |
| H | -0.573123 | 1.455108  | 3.533496  | O | -0.705644 | 3.048845  | -2.181895 |
| H | -0.006767 | 2.244658  | 2.070942  | O | 0.819568  | -1.732257 | 0.027460  |
| C | -0.632383 | -1.112324 | 2.644665  | C | 0.010429  | -2.728662 | -0.632776 |
| H | -0.705074 | -1.016574 | 3.731561  | H | -0.177959 | -2.449427 | -1.667447 |
| H | -1.647369 | -1.132717 | 2.244714  | H | 0.531896  | -3.681436 | -0.580802 |
| H | -0.165972 | -2.077367 | 2.441542  | H | -0.925800 | -2.782631 | -0.087941 |
| W | 1.816943  | 1.419071  | -1.064182 | H | 1.709097  | -1.695286 | -0.352455 |
| C | 3.048127  | 2.495631  | -2.244797 |   |           |           |           |

(7'→3a')<sup>‡</sup>

$E = -1248.55269867$  au

ZPE = 0.22029633 au

$G_{\text{corr}} = 0.17062555$  au

$\nu = -1707.76$  cm<sup>-1</sup>

|   |           |           |           |   |          |           |          |
|---|-----------|-----------|-----------|---|----------|-----------|----------|
| P | -0.243225 | -0.326630 | -0.003997 | C | 1.376839 | -0.084897 | 2.273005 |
| C | -0.086984 | -0.027991 | 1.831182  | H | 1.448129 | 0.216546  | 3.320906 |

|   |           |           |           |   |           |           |           |
|---|-----------|-----------|-----------|---|-----------|-----------|-----------|
| H | 1.794663  | -1.087334 | 2.194790  | O | -2.105278 | 2.439641  | -2.142617 |
| H | 2.001721  | 0.594539  | 1.691070  | C | -1.668647 | -1.275024 | -2.796437 |
| C | -0.604283 | 1.398232  | 2.044909  | O | -1.258981 | -1.660848 | -3.789765 |
| H | -1.644202 | 1.525320  | 1.747863  | C | -2.769233 | -2.440284 | -0.295417 |
| H | -0.538934 | 1.648308  | 3.106115  | O | -2.921509 | -3.479043 | 0.151167  |
| H | -0.007735 | 2.131341  | 1.498281  | C | -3.584394 | 0.190233  | 0.525612  |
| C | -0.909953 | -1.038139 | 2.624639  | O | -4.253409 | 0.588288  | 1.360642  |
| H | -0.813241 | -0.837672 | 3.694592  | O | 0.856560  | -1.862081 | -0.021716 |
| H | -1.969795 | -0.993062 | 2.377716  | C | 0.736020  | -2.806463 | -1.078422 |
| H | -0.567267 | -2.058907 | 2.449782  | H | 0.874845  | -2.342627 | -2.056900 |
| W | -2.518885 | -0.549043 | -1.071007 | H | 1.514303  | -3.554397 | -0.935824 |
| C | -4.292643 | -0.670893 | -2.029818 | H | -0.237658 | -3.293161 | -1.048891 |
| O | -5.294857 | -0.746127 | -2.577423 | H | 1.212692  | -0.746970 | -0.418272 |
| C | -2.249163 | 1.373645  | -1.765304 |   |           |           |           |

(7'→3a')<sup>‡</sup>·MeOH

$E = -1364.30489212$  au

ZPE = 0.27711982 au

$G_{\text{corr}} = 0.22362663$  au

$\nu = -314.21$  cm<sup>-1</sup>

|   |           |           |           |   |           |           |           |
|---|-----------|-----------|-----------|---|-----------|-----------|-----------|
| P | 0.264441  | -0.102767 | -0.268680 | C | 3.619264  | 0.391458  | -0.024113 |
| C | -0.145610 | -0.220298 | 1.559718  | O | 4.438268  | -0.182503 | 0.531030  |
| C | 1.082922  | -0.312860 | 2.460855  | C | 2.334059  | 0.313003  | -2.682767 |
| H | 0.782087  | -0.310267 | 3.512616  | O | 2.436785  | -0.304242 | -3.640143 |
| H | 1.648849  | -1.229424 | 2.290383  | C | 0.656507  | 2.549069  | -1.879558 |
| H | 1.760491  | 0.526433  | 2.310506  | O | -0.191054 | 3.143952  | -2.361168 |
| C | -0.918868 | 1.065534  | 1.865723  | O | 0.629924  | -1.780522 | -0.657781 |
| H | -1.833551 | 1.136093  | 1.274371  | C | 1.893030  | -2.408549 | -0.519356 |
| H | -1.202294 | 1.085292  | 2.921005  | H | 2.255380  | -2.337638 | 0.505331  |
| H | -0.330965 | 1.963554  | 1.675065  | H | 1.771069  | -3.462117 | -0.770337 |
| C | -1.060564 | -1.416715 | 1.818285  | H | 2.636740  | -1.975239 | -1.188189 |
| H | -1.365781 | -1.431368 | 2.868123  | H | -0.371156 | -2.010124 | -1.622348 |
| H | -1.970549 | -1.363066 | 1.217079  | O | -1.247430 | -1.653253 | -2.115823 |
| H | -0.569271 | -2.367102 | 1.609229  | H | -1.209596 | -0.746301 | -1.585087 |
| W | 2.167927  | 1.469854  | -0.994507 | C | -2.421957 | -2.426833 | -1.797993 |
| C | 3.551664  | 2.703121  | -1.769178 | H | -2.571694 | -2.484105 | -0.721251 |
| O | 4.344779  | 3.399938  | -2.222080 | H | -3.274733 | -1.949450 | -2.270360 |
| C | 2.077893  | 2.715764  | 0.635095  | H | -2.283626 | -3.422214 | -2.208879 |
| O | 2.074506  | 3.445905  | 1.515293  |   |           |           |           |

(7'→3a')<sup>‡</sup>·(MeOH)<sub>2</sub>

$E = -1480.04011201$  au

ZPE = 0.33230475 au

$G_{\text{corr}} = 0.27407983$  au

$\nu = -119.95$  cm<sup>-1</sup>

|   |           |           |           |   |           |           |          |
|---|-----------|-----------|-----------|---|-----------|-----------|----------|
| P | -0.041845 | 0.055083  | -0.024508 | H | 1.942869  | -0.911433 | 2.168025 |
| C | -0.016309 | 0.011570  | 1.856503  | H | 1.968077  | 0.846191  | 2.181357 |
| C | 1.381899  | -0.026133 | 2.467945  | C | -0.719673 | 1.304158  | 2.281999 |
| H | 1.318570  | -0.034847 | 3.560313  | H | -1.758198 | 1.328036  | 1.946620 |

|   |           |           |           |   |           |           |           |
|---|-----------|-----------|-----------|---|-----------|-----------|-----------|
| H | -0.719919 | 1.388328  | 3.371816  | C | 1.312104  | -2.388840 | -0.271781 |
| H | -0.226330 | 2.195920  | 1.893019  | H | 1.487700  | -2.631342 | 0.777404  |
| C | -0.832853 | -1.178793 | 2.360649  | H | 1.203224  | -3.320445 | -0.827831 |
| H | -0.944227 | -1.118445 | 3.446746  | H | 2.178696  | -1.854834 | -0.659908 |
| H | -1.836195 | -1.196060 | 1.930187  | H | -1.049647 | -2.157596 | -1.050791 |
| H | -0.360058 | -2.135948 | 2.139798  | O | -1.962624 | -2.330288 | -1.533950 |
| W | 1.779316  | 1.438057  | -1.230426 | H | -2.525039 | -1.380648 | -1.382503 |
| C | 3.039934  | 2.517089  | -2.359156 | C | -1.742965 | -2.596997 | -2.928936 |
| O | 3.761061  | 3.125458  | -3.015981 | H | -2.711017 | -2.705918 | -3.409685 |
| C | 1.890252  | 2.890346  | 0.217358  | H | -1.185170 | -1.791357 | -3.405044 |
| O | 1.983897  | 3.723063  | 0.995887  | H | -1.190843 | -3.528704 | -3.021534 |
| C | 3.367896  | 0.492765  | -0.338055 | O | -2.939181 | -0.166946 | -1.139369 |
| O | 4.275703  | -0.001583 | 0.152664  | H | -2.078403 | 0.179951  | -0.720357 |
| C | 1.691029  | 0.016954  | -2.705525 | C | -4.017759 | -0.037880 | -0.216890 |
| O | 1.635316  | -0.769405 | -3.535734 | H | -4.892295 | -0.522879 | -0.644185 |
| C | 0.170652  | 2.413706  | -2.059273 | H | -3.789342 | -0.502208 | 0.744829  |
| O | -0.728373 | 2.955135  | -2.510815 | H | -4.244697 | 1.015507  | -0.057102 |
| O | 0.125751  | -1.632590 | -0.436517 |   |           |           |           |

**(7'→8')<sup>‡</sup>**

$E = -1248.55952114$  au

ZPE = 0.21795860 au

$G_{\text{corr}} = 0.16830392$  au

$\nu = -1490.54$  cm<sup>-1</sup>

|   |           |           |           |   |           |           |           |
|---|-----------|-----------|-----------|---|-----------|-----------|-----------|
| P | -0.043024 | -0.005575 | 0.315068  | O | 3.753256  | 3.001320  | -2.877617 |
| C | 0.181712  | 0.061283  | 2.172779  | C | 1.859693  | 2.759777  | 0.300487  |
| C | 1.621390  | 0.012089  | 2.664909  | O | 1.937481  | 3.650161  | 1.005366  |
| H | 1.641253  | 0.000672  | 3.758117  | C | 3.502060  | 0.429466  | -0.176937 |
| H | 2.138124  | -0.883997 | 2.320266  | O | 4.446089  | 0.010404  | 0.305828  |
| H | 2.193775  | 0.880257  | 2.339971  | C | 1.944567  | -0.122395 | -2.634774 |
| C | -0.503044 | 1.354042  | 2.623442  | O | 2.035737  | -0.823239 | -3.530325 |
| H | -1.549198 | 1.388301  | 2.313757  | C | 0.146044  | 2.027013  | -1.977472 |
| H | -0.480573 | 1.419252  | 3.713732  | O | -0.781809 | 2.463344  | -2.469041 |
| H | -0.013295 | 2.248917  | 2.241144  | O | 0.685783  | -1.641892 | 0.070000  |
| C | -0.599788 | -1.129993 | 2.739646  | C | -0.060078 | -2.505738 | -0.777146 |
| H | -0.618079 | -1.064691 | 3.830552  | H | -0.184649 | -2.085293 | -1.778683 |
| H | -1.635507 | -1.140306 | 2.394577  | H | 0.477408  | -3.449196 | -0.854342 |
| H | -0.141919 | -2.083581 | 2.478163  | H | -1.050077 | -2.681289 | -0.351979 |
| W | 1.830927  | 1.217798  | -1.082780 | H | 1.411093  | -0.653396 | -0.466188 |
| C | 3.056419  | 2.369295  | -2.231462 |   |           |           |           |

**8'**

$E = -1248.61478663$  au

ZPE = 0.22244975 au

$G_{\text{corr}} = 0.17206367$  au

|   |          |           |          |   |           |           |          |
|---|----------|-----------|----------|---|-----------|-----------|----------|
| P | 0.038395 | -0.124372 | 0.502718 | H | 1.457807  | -2.112051 | 2.346179 |
| C | 0.355558 | -0.229750 | 2.339906 | H | 2.485241  | -0.680455 | 2.242178 |
| C | 1.571464 | -1.082837 | 2.684608 | C | 0.559683  | 1.209064  | 2.812195 |
| H | 1.713349 | -1.103795 | 3.767969 | H | -0.292655 | 1.847917  | 2.572787 |

|   |           |           |           |   |           |           |           |
|---|-----------|-----------|-----------|---|-----------|-----------|-----------|
| H | 0.686434  | 1.223833  | 3.896623  | O | 4.369138  | 2.013360  | 0.706090  |
| H | 1.454397  | 1.660770  | 2.378057  | C | 2.826155  | -0.241402 | -1.954389 |
| C | -0.908439 | -0.817263 | 2.971525  | O | 3.381169  | -1.124642 | -2.411183 |
| H | -0.796621 | -0.846828 | 4.057570  | C | 0.267702  | 1.081813  | -2.458845 |
| H | -1.791832 | -0.217385 | 2.746127  | O | -0.587530 | 0.946607  | -3.198624 |
| H | -1.094308 | -1.836566 | 2.631967  | O | 0.127716  | -1.718109 | 0.092969  |
| W | 1.841170  | 1.387231  | -1.157608 | C | -0.492998 | -2.127147 | -1.114428 |
| C | 2.678744  | 2.551431  | -2.535159 | H | 0.139604  | -1.914109 | -1.979821 |
| O | 3.178017  | 3.218391  | -3.322385 | H | -0.643540 | -3.203819 | -1.058588 |
| C | 0.856373  | 3.019461  | -0.367353 | H | -1.463208 | -1.646066 | -1.265139 |
| O | 0.320152  | 3.933366  | 0.049976  | H | 1.506933  | 0.181751  | 0.337219  |
| C | 3.457697  | 1.774411  | 0.065916  |   |           |           |           |

**(8'→3a')<sup>‡</sup>**

$E = -1248.61160839$  au

ZPE = 0.22202724 au

$G_{\text{corr}} = 0.17204787$  au

$\nu = -198.68$  cm<sup>-1</sup>

|   |           |           |           |   |           |           |           |
|---|-----------|-----------|-----------|---|-----------|-----------|-----------|
| P | 0.374096  | -0.219164 | 0.511605  | O | 2.909489  | 3.389836  | -3.394913 |
| C | 0.403630  | -0.271472 | 2.373881  | C | 0.762000  | 2.993230  | -0.375056 |
| C | 1.437989  | -1.260976 | 2.901964  | O | 0.188140  | 3.870075  | 0.070401  |
| H | 1.415694  | -1.269390 | 3.994642  | C | 3.443323  | 1.920021  | -0.054897 |
| H | 1.241785  | -2.276800 | 2.560386  | O | 4.363073  | 2.227897  | 0.544601  |
| H | 2.448877  | -0.988898 | 2.593581  | C | 2.887237  | -0.095682 | -2.100821 |
| C | 0.739985  | 1.148515  | 2.825071  | O | 3.493567  | -0.913839 | -2.611689 |
| H | 0.001326  | 1.875927  | 2.484538  | C | 0.222861  | 1.052087  | -2.483558 |
| H | 0.758977  | 1.187950  | 3.916175  | O | -0.643796 | 0.882318  | -3.202132 |
| H | 1.722622  | 1.471877  | 2.474465  | O | 0.290895  | -1.814612 | 0.106546  |
| C | -0.998083 | -0.661044 | 2.844352  | C | -0.442192 | -2.162836 | -1.056915 |
| H | -1.032156 | -0.666012 | 3.936016  | H | 0.126849  | -1.954496 | -1.966329 |
| H | -1.754166 | 0.041759  | 2.491183  | H | -0.635131 | -3.233318 | -1.012635 |
| H | -1.275308 | -1.659029 | 2.503027  | H | -1.399311 | -1.637934 | -1.116459 |
| W | 1.817526  | 1.435791  | -1.225502 | H | 1.823550  | -0.058868 | 0.441654  |
| C | 2.508423  | 2.669898  | -2.594127 |   |           |           |           |

**9'**

$E = -1514.09934687$  au

ZPE = 0.32940096 au

$G_{\text{corr}} = 0.27259477$  au

|   |           |           |          |   |           |           |           |
|---|-----------|-----------|----------|---|-----------|-----------|-----------|
| P | -0.348444 | -0.416903 | 0.892400 | C | -0.782326 | -0.299934 | 3.646754  |
| C | -0.051839 | 0.459881  | 2.537806 | H | -0.477065 | 0.084654  | 4.624520  |
| C | 1.456587  | 0.320263  | 2.768794 | H | -1.865451 | -0.191908 | 3.582493  |
| H | 1.742762  | 0.817489  | 3.699898 | H | -0.551633 | -1.366349 | 3.622736  |
| H | 1.755384  | -0.726454 | 2.841562 | N | -1.972270 | -2.914005 | -0.568069 |
| H | 2.043706  | 0.776468  | 1.970185 | C | -2.878566 | -3.385003 | -1.400763 |
| C | -0.428344 | 1.937922  | 2.596239 | N | -2.311324 | -4.300048 | -2.177237 |
| H | -1.489020 | 2.105255  | 2.409929 | C | -0.987824 | -4.406228 | -1.827716 |
| H | -0.203087 | 2.350013  | 3.585493 | C | -0.778161 | -3.527526 | -0.816672 |
| H | 0.128904  | 2.522768  | 1.865424 | C | -2.970381 | -5.051167 | -3.227929 |

|   |           |           |           |   |           |           |           |
|---|-----------|-----------|-----------|---|-----------|-----------|-----------|
| H | -2.938472 | -6.113820 | -3.001676 | O | 2.521750  | 2.660772  | -0.066838 |
| H | -2.476755 | -4.865585 | -4.178241 | C | 1.298908  | -0.525086 | -1.735446 |
| H | -4.006073 | -4.733882 | -3.300233 | O | 1.986498  | -1.406885 | -1.979669 |
| H | -3.908601 | -3.077058 | -1.454974 | C | -1.499413 | 0.042098  | -2.162063 |
| H | -0.315216 | -5.082538 | -2.325347 | O | -2.353834 | -0.508509 | -2.698682 |
| H | 0.109174  | -3.271533 | -0.264045 | O | -2.042144 | -0.826960 | 0.994814  |
| W | 0.044402  | 1.028072  | -1.266160 | H | -2.104594 | -2.106773 | 0.113416  |
| C | 0.414583  | 1.934912  | -3.009963 | C | -3.088412 | 0.116111  | 0.918933  |
| O | 0.618486  | 2.453736  | -4.018411 | H | -4.037726 | -0.424544 | 0.922361  |
| C | -1.211395 | 2.543810  | -0.682916 | H | -3.084694 | 0.789313  | 1.777998  |
| O | -1.902470 | 3.404266  | -0.378567 | H | -3.036895 | 0.719004  | 0.010266  |
| C | 1.630447  | 2.060077  | -0.458906 |   |           |           |           |

**(9'→3a')<sup>‡</sup>**

$E = -1514.09756515$  au

ZPE = 0.32924041 au

$G_{\text{corr}} = 0.27317594$  au

$\nu = -128.33$  cm<sup>-1</sup>

|   |           |           |           |   |           |           |           |
|---|-----------|-----------|-----------|---|-----------|-----------|-----------|
| P | -0.450363 | -0.431237 | 0.955659  | H | -4.195477 | -4.320710 | -2.923295 |
| C | -0.121397 | 0.507452  | 2.560778  | H | -3.560697 | -3.019944 | -0.896022 |
| C | 1.387612  | 0.373113  | 2.783293  | H | -0.430149 | -5.029821 | -2.865826 |
| H | 1.684400  | 0.899639  | 3.694822  | H | 0.575739  | -3.712255 | -0.649760 |
| H | 1.685251  | -0.671484 | 2.887632  | W | 0.016108  | 0.904546  | -1.259038 |
| H | 1.967449  | 0.800497  | 1.963622  | C | 0.401406  | 1.732563  | -3.037896 |
| C | -0.499495 | 1.986527  | 2.565246  | O | 0.610124  | 2.204898  | -4.068287 |
| H | -1.566148 | 2.140964  | 2.402801  | C | -1.327492 | 2.385197  | -0.784681 |
| H | -0.248856 | 2.441718  | 3.529307  | O | -2.059531 | 3.227211  | -0.530137 |
| H | 0.033037  | 2.541831  | 1.794404  | C | 1.525575  | 2.056021  | -0.465393 |
| C | -0.849135 | -0.204526 | 3.702573  | O | 2.378921  | 2.717325  | -0.086565 |
| H | -0.548029 | 0.224302  | 4.663165  | C | 1.367925  | -0.598107 | -1.580134 |
| H | -1.932215 | -0.103991 | 3.627433  | O | 2.115448  | -1.451946 | -1.738048 |
| H | -0.614224 | -1.270198 | 3.726496  | C | -1.431458 | -0.215359 | -2.153671 |
| N | -1.483364 | -3.173046 | -0.431501 | O | -2.222736 | -0.849190 | -2.697535 |
| C | -2.581168 | -3.402986 | -1.123678 | O | -2.123581 | -0.813819 | 1.069826  |
| N | -2.269697 | -4.175652 | -2.154016 | H | -1.425355 | -2.520348 | 0.356677  |
| C | -0.919789 | -4.428602 | -2.120151 | C | -3.161253 | 0.108030  | 0.858637  |
| C | -0.425807 | -3.787700 | -1.033327 | H | -4.112246 | -0.402973 | 1.030172  |
| C | -3.187301 | -4.628542 | -3.182192 | H | -3.114226 | 0.957554  | 1.544747  |
| H | -3.154001 | -5.712130 | -3.255137 | H | -3.169414 | 0.501049  | -0.161820 |
| H | -2.915231 | -4.187681 | -4.137686 |   |           |           |           |

**11<sup>++</sup>**

$E = -1398.833880229162$  au

ZPE = 0.28567851 au

$G_{\text{corr}} = 0.23326223$  au

|   |           |           |          |   |           |          |          |
|---|-----------|-----------|----------|---|-----------|----------|----------|
| P | -0.156627 | 0.253301  | 0.045125 | H | 1.973492  | 0.917109 | 1.877571 |
| C | -0.021979 | -0.010242 | 1.881917 | C | -0.707286 | 1.140683 | 2.613088 |
| C | 1.483935  | -0.011822 | 2.166910 | H | -1.781298 | 1.175107 | 2.421335 |
| H | 1.638844  | -0.131470 | 3.240406 | H | -0.579218 | 1.012068 | 3.689091 |
| H | 1.996254  | -0.836738 | 1.669289 | H | -0.281586 | 2.108606 | 2.348025 |

|   |           |           |           |   |           |           |           |
|---|-----------|-----------|-----------|---|-----------|-----------|-----------|
| C | -0.623487 | -1.350672 | 2.295708  | H | -5.030902 | -0.403344 | -0.650607 |
| H | -0.415389 | -1.520398 | 3.353578  | H | -3.037105 | 1.308939  | 0.123409  |
| H | -1.707105 | -1.378437 | 2.178139  | W | 0.294170  | 2.358262  | -1.174533 |
| H | -0.189611 | -2.188004 | 1.745718  | C | 0.670979  | 4.005450  | -2.314871 |
| N | -1.793157 | -0.401280 | -0.312923 | O | 0.878104  | 4.916738  | -2.964611 |
| C | -2.066949 | -1.626020 | -0.754550 | C | -1.194286 | 3.391235  | -0.203124 |
| N | -3.371376 | -1.741378 | -0.931557 | O | -2.013022 | 3.979099  | 0.330749  |
| C | -3.966966 | -0.554220 | -0.588882 | C | 1.636005  | 3.093131  | 0.214796  |
| C | -2.979745 | 0.286622  | -0.205261 | O | 2.374627  | 3.540548  | 0.955910  |
| C | -4.064165 | -2.921588 | -1.425403 | C | 1.833486  | 1.374576  | -2.143480 |
| H | -4.572731 | -2.682387 | -2.355185 | O | 2.681074  | 0.832289  | -2.673406 |
| H | -4.786297 | -3.255437 | -0.685642 | C | -1.038775 | 1.721670  | -2.607544 |
| H | -3.342560 | -3.712129 | -1.604388 | O | -1.783430 | 1.366353  | -3.393740 |
| H | -1.343448 | -2.400439 | -0.948945 | H | 0.506197  | -0.905117 | -0.406117 |

**11<sup>+</sup>** (gas phase)

$E = -1398.78584020$  au

ZPE = 0.28656344 au

TVC = 0.02314551 au

T·S = 50.10 kcal/mol

$G_{\text{corr}} = 0.23364027$  au

|   |           |           |           |   |           |           |           |
|---|-----------|-----------|-----------|---|-----------|-----------|-----------|
| P | -0.145022 | 0.265848  | 0.067673  | C | -4.078088 | -2.862311 | -1.515751 |
| C | -0.003174 | -0.003480 | 1.904973  | H | -4.574247 | -2.582389 | -2.441497 |
| C | 1.505505  | 0.008434  | 2.179963  | H | -4.811073 | -3.229973 | -0.802446 |
| H | 1.671090  | -0.117204 | 3.251164  | H | -3.361723 | -3.651310 | -1.723815 |
| H | 2.026129  | -0.808047 | 1.676534  | H | -1.354331 | -2.368004 | -0.997265 |
| H | 1.984068  | 0.944116  | 1.894826  | H | -5.039010 | -0.377208 | -0.625423 |
| C | -0.690973 | 1.142086  | 2.642910  | H | -3.039305 | 1.290492  | 0.227806  |
| H | -1.769288 | 1.160005  | 2.474554  | W | 0.282683  | 2.325175  | -1.180043 |
| H | -0.541416 | 1.024622  | 3.717308  | C | 0.640789  | 3.966734  | -2.362775 |
| H | -0.286652 | 2.115002  | 2.363953  | O | 0.832708  | 4.864143  | -3.029060 |
| C | -0.589411 | -1.349288 | 2.323041  | C | -1.224622 | 3.354534  | -0.233867 |
| H | -0.378323 | -1.519079 | 3.380154  | O | -2.059477 | 3.926619  | 0.290646  |
| H | -1.673124 | -1.390410 | 2.209584  | C | 1.611450  | 3.109800  | 0.204769  |
| H | -0.147337 | -2.184299 | 1.775485  | O | 2.336956  | 3.573702  | 0.945420  |
| N | -1.802290 | -0.402773 | -0.272492 | C | 1.845519  | 1.350135  | -2.131135 |
| C | -2.077655 | -1.601870 | -0.771449 | O | 2.699636  | 0.807605  | -2.646129 |
| N | -3.384159 | -1.709789 | -0.960439 | C | -1.036291 | 1.629786  | -2.595360 |
| C | -3.976065 | -0.537212 | -0.566126 | O | -1.780534 | 1.221085  | -3.355591 |
| C | -2.986003 | 0.281587  | -0.141129 | H | 0.491727  | -0.916200 | -0.372976 |

**12<sup>+</sup>**

$E = -1438.148890300190$  au

ZPE = 0.31567536 au

$G_{\text{corr}} = 0.26249370$  au

|   |           |           |           |   |           |           |          |
|---|-----------|-----------|-----------|---|-----------|-----------|----------|
| P | 0.057756  | -0.088093 | -0.021954 | H | 1.928823  | -0.991651 | 2.158181 |
| C | -0.017632 | -0.030015 | 1.846892  | H | 2.042791  | 0.747456  | 1.873781 |
| C | 1.436727  | -0.034715 | 2.331402  | C | -0.702843 | 1.265447  | 2.277343 |
| H | 1.447990  | 0.144406  | 3.407644  | H | -1.738452 | 1.326527  | 1.939080 |



|   |           |           |           |   |           |           |           |
|---|-----------|-----------|-----------|---|-----------|-----------|-----------|
| H | -0.722555 | 1.313531  | 3.367418  | H | -2.731037 | 1.114536  | -0.320920 |
| H | -0.173770 | 2.149429  | 1.923060  | W | 0.605034  | 1.883351  | -1.463219 |
| C | -0.759241 | -1.228375 | 2.435827  | C | 1.062581  | 3.388063  | -2.750854 |
| H | -0.669175 | -1.194383 | 3.523034  | O | 1.314230  | 4.223292  | -3.483801 |
| H | -1.825250 | -1.214668 | 2.207353  | C | -0.905920 | 3.062235  | -0.721633 |
| H | -0.346268 | -2.186738 | 2.118057  | O | -1.729190 | 3.749121  | -0.331423 |
| N | -1.593879 | -0.719197 | -0.402612 | C | 1.885752  | 2.737520  | -0.086615 |
| C | -1.941206 | -1.979041 | -0.654310 | O | 2.598475  | 3.242477  | 0.643653  |
| N | -3.241842 | -2.036365 | -0.882904 | C | 2.190358  | 0.827134  | -2.257607 |
| C | -3.762501 | -0.773229 | -0.770602 | O | 3.074168  | 0.270897  | -2.710903 |
| C | -2.732781 | 0.050768  | -0.473358 | C | -0.653222 | 1.088409  | -2.882983 |
| C | -3.996412 | -3.234252 | -1.216791 | O | -1.354563 | 0.641542  | -3.663003 |
| H | -4.445034 | -3.120178 | -2.199712 | C | 1.019389  | -1.593361 | -0.387980 |
| H | -4.772861 | -3.393839 | -0.473868 | H | 2.069591  | -1.352108 | -0.229903 |
| H | -3.327580 | -4.088871 | -1.225132 | H | 0.776909  | -2.446735 | 0.244194  |
| H | -1.280330 | -2.828001 | -0.681412 | H | 0.907999  | -1.864747 | -1.437343 |
| H | -4.807918 | -0.563445 | -0.917377 |   |           |           |           |

Me<sub>3</sub>P (gas phase)

$E = -461.01963096$  au

ZPE = 0.11637485 au

TVC = 0.00368700 au

T·S = 22.97 kcal/mol

$G_{\text{corr}} = 0.08723634$  au

|   |           |           |           |   |           |           |           |
|---|-----------|-----------|-----------|---|-----------|-----------|-----------|
| P | 0.340562  | -0.370282 | 1.459911  | H | -0.275932 | -0.787765 | -0.910062 |
| C | 1.510166  | 0.860827  | 0.727155  | H | 0.892181  | -1.971767 | -0.304337 |
| H | 1.710699  | 1.655514  | 1.445791  | C | -1.199116 | 0.654353  | 1.468569  |
| H | 2.462044  | 0.379801  | 0.501939  | H | -1.117740 | 1.440105  | 2.219666  |
| H | 1.126231  | 1.312907  | -0.189557 | H | -1.400705 | 1.120136  | 0.501846  |
| C | 0.006414  | -1.391668 | -0.045343 | H | -2.055005 | 0.035588  | 1.738321  |
| H | -0.796892 | -2.099946 | 0.157672  |   |           |           |           |

Me<sub>3</sub>PH<sup>+</sup> (gas phase)

$E = -461.39490788$  au

ZPE = 0.12699682 au

TVC = 0.00393930 au

T·S = 23.35 kcal/mol

$G_{\text{corr}} = 0.09749620$  au

|   |           |           |           |   |           |           |           |
|---|-----------|-----------|-----------|---|-----------|-----------|-----------|
| H | -0.694694 | 0.845274  | -1.672224 | H | -2.621919 | 1.324175  | -4.563414 |
| P | -1.594506 | 0.355874  | -2.624374 | H | -2.353786 | 2.535859  | -3.299524 |
| C | -0.830506 | -1.057908 | -3.432327 | H | -0.998836 | 1.980614  | -4.294723 |
| H | -1.507306 | -1.465174 | -4.182996 | C | -3.099204 | -0.128350 | -1.766073 |
| H | 0.096236  | -0.759846 | -3.920962 | H | -3.824652 | -0.515379 | -2.481168 |
| H | -0.606892 | -1.835717 | -2.703309 | H | -2.883668 | -0.903161 | -1.031452 |
| C | -1.921758 | 1.673001  | -3.804780 | H | -3.535222 | 0.728048  | -1.253308 |

Me<sub>2</sub>C=O (gas phase)

$E = -193.11191615$  au

ZPE = 0.08620305 au

TVC = 0.00163032 au  
T·S = 20.20 kcal/mol  
 $G_{\text{corr}}$  = 0.05941754 au

|   |           |           |          |   |           |           |          |
|---|-----------|-----------|----------|---|-----------|-----------|----------|
| O | -0.000000 | -0.000000 | 0.012673 | H | 1.317000  | 0.874854  | 2.674783 |
| C | 0.000000  | 0.000001  | 1.215752 | C | -1.276647 | 0.000000  | 2.022743 |
| C | 1.276647  | 0.000000  | 2.022743 | H | -2.149108 | -0.000001 | 1.373900 |
| H | 2.149108  | -0.000001 | 1.373900 | H | -1.317000 | 0.874854  | 2.674783 |
| H | 1.316998  | -0.874854 | 2.674783 | H | -1.316998 | -0.874854 | 2.674783 |

Me<sub>2</sub>C=O<sup>+</sup> (gas phase)

$E$  = -193.43536593 au  
ZPE = 0.09883981 au  
TVC = 0.00179692 au  
T·S = 20.44 kcal/mol  
 $G_{\text{corr}}$  = 0.07184320 au

|   |           |           |          |   |           |           |           |
|---|-----------|-----------|----------|---|-----------|-----------|-----------|
| O | -0.032405 | -0.000000 | 0.036767 | C | -1.271581 | 0.000000  | 2.002590  |
| C | 0.017261  | -0.000000 | 1.300921 | H | -2.121603 | 0.000000  | 1.325848  |
| C | 1.293496  | 0.000000  | 2.033834 | H | -1.322669 | 0.870368  | 2.663088  |
| H | 2.178427  | 0.000000  | 1.399404 | H | -1.322669 | -0.870368 | 2.663088  |
| H | 1.327801  | -0.870643 | 2.694549 | H | 0.831237  | -0.000000 | -0.413795 |
| H | 1.327801  | 0.870643  | 2.694549 |   |           |           |           |

CF<sub>3</sub>SO<sub>3</sub><sup>-</sup> (gas phase)

$E$  = -961.60030040 au  
ZPE = 0.02865669 au  
TVC = 0.00418988 au  
T·S = 25.00 kcal/mol  
 $G_{\text{corr}}$  = -0.00322414 au

|   |           |           |           |   |           |           |           |
|---|-----------|-----------|-----------|---|-----------|-----------|-----------|
| S | -1.326753 | -4.066363 | -1.425040 | C | -2.467967 | -4.596488 | -0.064765 |
| O | -0.044765 | -3.967928 | -0.730759 | F | -3.726944 | -4.749521 | -0.498030 |
| O | -1.917714 | -2.798088 | -1.846276 | F | -2.505968 | -3.703500 | 0.933879  |
| O | -1.448579 | -5.168660 | -2.376519 | F | -2.096563 | -5.766434 | 0.473185  |

CF<sub>3</sub>SO<sub>3</sub>H (gas phase)

$E$  = -962.08976692 au  
ZPE = 0.04061674 au  
TVC = 0.00471738 au  
T·S = 25.55 kcal/mol  
 $G_{\text{corr}}$  = 0.00838957 au

|   |           |           |           |   |           |           |           |
|---|-----------|-----------|-----------|---|-----------|-----------|-----------|
| H | -1.525185 | -2.034779 | -1.388237 | C | -2.490053 | -4.621136 | -0.034651 |
| S | -1.298656 | -4.173940 | -1.370087 | F | -3.701418 | -4.767044 | -0.532629 |
| O | -0.033439 | -3.926216 | -0.734200 | F | -2.501853 | -3.665628 | 0.882894  |
| O | -1.944802 | -2.785494 | -1.833374 | F | -2.093581 | -5.753698 | 0.514310  |
| O | -1.495158 | -5.104759 | -2.437546 |   |           |           |           |

AcO<sup>-</sup> (gas phase)

$E$  = -228.49541650 au  
ZPE = 0.04998790 au  
TVC = 0.00157678 au

TS = 20.37 kcal/mol  
 $G_{\text{corr}} = 0.02288110$  au

|   |           |           |          |   |           |           |          |
|---|-----------|-----------|----------|---|-----------|-----------|----------|
| O | 0.997982  | -2.622347 | 2.870146 | H | 0.408811  | -5.186353 | 3.212745 |
| C | -0.025305 | -3.174581 | 2.429592 | H | -0.664249 | -4.253998 | 4.232837 |
| O | -0.766908 | -2.838007 | 1.492668 | H | -1.292099 | -4.983471 | 2.745149 |
| C | -0.428932 | -4.483343 | 3.188861 |   |           |           |          |

HOAc (gas phase)

$E = -229.06404609$  au  
ZPE = 0.06400766 au  
TVC = 0.00164075 au  
T·S = 20.21 kcal/mol  
 $G_{\text{corr}} = 0.03721520$ au

|   |           |           |           |   |           |           |           |
|---|-----------|-----------|-----------|---|-----------|-----------|-----------|
| C | 0.006157  | -0.000002 | 0.004040  | H | -2.107707 | 0.000001  | -0.285208 |
| O | -0.006480 | 0.000000  | 1.202445  | H | -1.201902 | 0.876485  | -1.533610 |
| O | 1.138919  | 0.000000  | -0.711241 | H | -1.201904 | -0.876485 | -1.533611 |
| C | -1.203042 | -0.000000 | -0.885289 | H | 1.883140  | 0.000001  | -0.095186 |

## 7 References

- 1 Armarego, W. *Purification of Laboratory Chemicals*, Elsevier, Amsterdam, 2003.
- 2 G. R. Fulmer, A. J. M. Miller, N. H. Sherden, H. E. Gottlieb, A. Nudelman, B. M. Stoltz, J. E. Bercaw and K. I. Goldberg, *Organometallics*, 2010, **29**, 2176.
- 3 R. K. Harris, E. D. Becker, S. M. Cabral de Menezes, P. Granger, R. E. Hoffman and K. W. Zilm, *Pure Appl. Chem.*, 2008, **80**, 59.
- 4 R. K. Harris, E. D. Becker, S. M. Cabral de Menezes, R. Goodfellow and P. Granger, *Pure Appl. Chem.*, 2001, **73**, 1795.
- 5 R. H. Blessing, *Acta Crystallogr., Sect. A: Found. Crystallogr.*, 1995, **51**, 33.
- 6 G. M. Sheldrick, *ShelXS97 and ShelXL97*, University of Göttingen, Germany, 1997.
- 7 O. V. Dolomanov, L. J. Bourhis, R. J. Gildea, J. A. K. Howard and H. Puschman, *J. Appl. Crystallogr.*, 2009, **42**, 339.
- 8 D. Biskup, G. Schnakenburg, R. T. Boéré, A. Espinosa Ferao and R. K. Streubel, *Nat. Commun.*, 2023, **14**, 6456.
- 9 R. Streubel, A. W. Kyri, L. Duan and G. Schnakenburg, *Dalton Trans.*, 2014, **43**, 2088.
- 10 P. K. Majhi, A. W. Kyri, A. Schmer, G. Schnakenburg and R. Streubel, *Chem. Eur. J.*, 2016, **22**, 15413.
- 11 R. Streubel, A. Schmer, A. W. Kyri and G. Schnakenburg, *Organometallics*, 2017, **36**, 1488.
- 12 M. Brookhart, B. Grant and A. F. Volpe, *Organometallics*, 1992, **11**, 3920.
- 13 I. Krossing and A. Reisinger, *Eur. J. Inorg. Chem.*, 2005, **2005**, 1979.
- 14 ORCA – an ab initio, DFT and semiempirical SCF-MO package. D-45470 Mülheim/Ruhr: Max Planck Institute for Bioinorganic Chemistry. Version 4.2.1. <http://www.cec.mpg.de/forum/portal.php>. F. Neese, *WIREs Comput. Mol. Sci.*, 2018, **8**, e1327.
- 15 S. Grimme, J. G. Brandenburg, C. Bannwarth and A. Hansen, *J. Chem. Phys.*, 2015, **143**, 54107.
- 16 S. Grimme, S. Ehrlich and L. Goerigk, *J. Comput. Chem.*, 2011, **32**, 1456.
- 17 S. Grimme, J. Antony, S. Ehrlich and H. Krieg, *J. Chem. Phys.*, 2010, **132**, 154104.
- 18 H. Kruse and S. Grimme, *J. Chem. Phys.*, 2012, **136**, 154101.
- 19 D. Andrae, U. Huermann, M. Dolg, H. Stoll and H. Preuß, *Theor. Chim. Acta*, 1990, **77**, 123.
- 20 B. Metz, H. Stoll and M. Dolg, *J. Chem. Phys.*, 2000, **113**, 2563.
- 21 L. Goerigk and S. Grimme, *J. Chem. Theory Comput.*, 2011, **7**, 291.
- 22 L. Goerigk and S. Grimme, *Phys. Chem. Chem. Phys.*, 2011, **13**, 6670.
- 23 F. Weigend, F. Furche and R. Ahlrichs, *J. Chem. Phys.*, 2003, **119**, 12753.
- 24 V. Barone and M. Cossi, *J. Phys. Chem. A*, 1998, **102**, 1995.
- 25 M. Cossi, N. Rega, G. Scalmani and V. Barone, *J. Comput. Chem.*, 2003, **24**, 669.
- 26 T. Lu and F. Chen, *J. Comput. Chem.*, 2012, **33**, 580. <http://sobereva.com/multiwfn/>.
